# Supplementary material for: Diastereoselective intramolecular cyclization/Povarov reaction cascade for the one-pot synthesis of polycyclic quinolines
Source: Royal Society of Chemistry journal article supplement (doi:10.1039/d2ob01031c), 2022-01-01
Supplement: d2ob01031c1.pdf [file d2ob01031c1.pdf]

## SUPPLEMENTARY INFORMATION

### **Diastereoselective intramolecular cyclization/Povarov reaction cascade for the one-pot synthesis of polycyclic quinolines**

A E E.A. Kuznetsova,<sup>a</sup> A.V. Smolobochkin,<sup>a</sup> T.S. Rizbayeva,<sup>a</sup> A.S. Gazizov,<sup>\*a</sup> J.K. Voronina,<sup>b,c</sup> O.A. Lodochnikova,<sup>a</sup> D.P. Gerasimova,<sup>a</sup> A.B. Dobrynin,<sup>a</sup> V.V. Syakaev,<sup>a</sup> D.N. Shurpik,<sup>d</sup> I.I. Stoikov,<sup>d</sup> A.R. Burilov,<sup>a</sup> M.A. Pudovik,<sup>a</sup> O.G. Sinyashin<sup>a</sup>

<sup>a</sup> *Arbuzov Institute of Organic and Physical Chemistry, FRC Kazan Scientific Center, Russian Academy of Sciences, Arbuzova str., 8, Kazan, Russian Federation*

<sup>b</sup> *N.S. Kurnakov Institute of General and Inorganic Chemistry, Russian Academy of Sciences, Leninsky Ave. 31, 119991 Moscow, Russian Federation*

<sup>c</sup> *G.V. Plekhanov Russian University of Economics, Stremyanny Per. 36, 117997 Moscow, Russian Federation*

<sup>d</sup> *Organic Chemistry Department of Kazan Federal University, Kremlevskaya, 18, 420008 Kazan, Russian Federation*

\* E-mail: [agazizov@iopc.ru](mailto:agazizov@iopc.ru)

## Table of Contents

|                                                                                          |    |
|------------------------------------------------------------------------------------------|----|
| General methods .....                                                                    | 3  |
| Synthesis of starting compounds .....                                                    | 3  |
| Synthesis of ureas 1 .....                                                               | 3  |
| General method for synthesis of ureas 1a-d,f-k,m-q .....                                 | 3  |
| Synthesis of 1-(4-bromobenzyl)-1-(2,2-dimethoxyethyl)-3-phenylurea (1l) .....            | 7  |
| Synthesis of imidazolin-2-one 3a .....                                                   | 7  |
| Synthesis of imidazolin-2-ones 3b,c,e .....                                              | 8  |
| Synthesis of imidazolin-2-one 3d .....                                                   | 9  |
| Reaction conditions optimization .....                                                   | 9  |
| Isolation of the 4,4'-bi(imidazole-2-one) 4 .....                                        | 10 |
| Synthesis of octahydro-diimidazoquinolines 2 .....                                       | 10 |
| General method for synthesis of octahydro-diimidazoquinolines 2a-g,i-m .....             | 11 |
| Synthesis of the 4,4'-bi(imidazole-2-one) derivatives 5 .....                            | 18 |
| Mechanistic studies .....                                                                | 20 |
| Synthesis of 4,4'-bi(imidazole-2-one) 4 .....                                            | 20 |
| Synthesis of octahydro-diimidazoquinolines ( <i>exo,endo</i> )-2a from compound 3a ..... | 20 |
| Synthesis of octahydro-diimidazoquinolines ( <i>exo,endo</i> )-2a from compound 4 .....  | 20 |
| Computational methods .....                                                              | 20 |
| Mechanism of the formation of octahydro-diimidazoquinolines 2 .....                      | 21 |
| References .....                                                                         | 24 |
| Coordinates of stationary points .....                                                   | 26 |
| Reaction depicted on Scheme S2 .....                                                     | 26 |
| Reaction depicted on Scheme S3 .....                                                     | 52 |
| 2D NMR data .....                                                                        | 61 |
| The structure assignment for the octahydro-diimidazoquinolines 2 .....                   | 61 |
| The structure assignment for the 4,4'-bi(imidazole-2-one) 5a .....                       | 62 |
| X-ray data .....                                                                         | 63 |
| Copies of NMR spectra .....                                                              | 68 |
| Copies of 2D NMR spectra .....                                                           | 68 |
| Copies of <sup>1</sup> H and <sup>13</sup> C NMR spectra .....                           | 95 |



## General methods

$^1\text{H}$  spectra were recorded on a Bruker MSL 400 (400 MHz), Bruker Avance 500 (500 MHz) or Bruker Avance 600 (600 MHz) spectrometer.  $^{13}\text{C}$  NMR spectra were recorded on a Bruker Avance 600 (151 MHz), Bruker Avance 500 (126 MHz) or Bruker MSL 400 (100 MHz) spectrometer. Chemical shifts were reported in parts per million (ppm), and the residual solvent peak was used as an internal reference (proton,  $\text{CDCl}_3$   $\delta$  7.28,  $(\text{CD}_3)_2\text{SO}$   $\delta$  2.50; carbon,  $\text{CDCl}_3$   $\delta$  77.7,  $(\text{CD}_3)_2\text{SO}$   $\delta$  40.0).  $^{31}\text{P}$  spectra were recorded on a Bruker MSL 400 (162 MHz) spectrometer using 85%  $\text{H}_3\text{PO}_4$  as an external reference. Multiplicity was indicated as follows: s (singlet), d (doublet), t (triplet), q (quartet), m (multiplet), dd (doublet of doublet), td (triplet of doublet), bs (broad singlet). Coupling constants were reported in Hertz (Hz). The IR spectra were recorded on a Vector 22 Fourier spectrometer by Bruker in the range of 400-4000  $\text{cm}^{-1}$ . Crystalline samples were studied as a suspension in vaseline oil. The melting points were determined in glass capillaries on a Stuart SMP 10 instrument. Elemental analysis of the compounds was carried out on a high-temperature 2-reactor C, H, N analyzer of EuroVector brand EA 3000. The halogen content was determined by the Schöniger method. MALDI-TOF mass spectra were recorded on a Bruker ULTRAFLEX III TOF/TOF instrument (with 2,5-dihydroxybenzoic acid matrix). All commercially available reagents were used as received for the reactions without any purification. All solvents were purified and dried according to standard procedures.

## Synthesis of starting compounds

### Synthesis of ureas 1

The ureas **1a-d,f-q** were obtained as described below. The urea **1e** was not isolated and the final compound **endo-2h** was obtained in one-pot manner directly from *p*-isopropylaniline and 2,2-dimethoxy-*N*-methylethan-1-amine (see page S13). The urea **1j** was obtained as described on page S7.

### General method for synthesis of ureas 1a-d,f-q

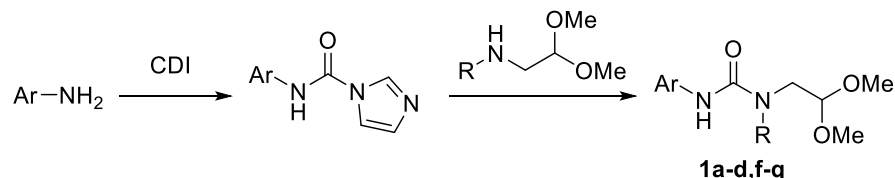

To a 25 mL flask a substituted aniline (5.4 mmol, 1.0 equiv.), chloroform (10 mL) and CDI (6.5 mmol, 1.2 equiv.) were added. The reaction mixture was allowed to stir at room temperature for 10 h. Then, 2,2-dimethoxy-*N*-methylethan-1-amine (0.94 g, 5.4 mmol, 1.0 equiv.) or 2,2-dimethoxyethan-1-amine (0.57 g, 5.4 mmol, 1.0 equiv.) was added and the reaction mixture was refluxed for 10 h. The mixture was subsequently cooled to room temperature, and distilled water (10 mL) was added. The mixture was transferred to a separatory funnel and the organic layer was separated. The aqueous layer was washed with chloroform (3 x 10 mL). The organic layers were combined, dried over  $\text{MgSO}_4$ , filtered, and concentrated under reduced pressure to give the crude compound **1** as an off-white solid, which was used in next steps without further purification.

### 1-(2,2-dimethoxyethyl)-1-methyl-3-phenylurea (**1a**)<sup>[1]</sup>

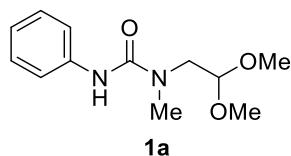

1.701 g, yield 65%, white solid, mp 66-68  $^\circ\text{C}$ ;  $^1\text{H}$  NMR (400 MHz,  $\text{CHCl}_3$ )  $\delta$  3.06 (s, 3H,  $\text{CH}_3$ ), 3.46 (d, 2H,  $J = 5.0$  Hz,  $\text{CH}_2$ ), 3.53 (s, 6H,  $\text{CH}_3$ ), 4.51 (t, 1H,  $J = 5.0$  Hz, CH), 6.99-7.04 (m, 1H, ArH), 7.26-7.32 (m, 2H, ArH), 7.32-

7.37 (m, 2H, ArH), 7.61 (br s, 1H, NH).  $^{13}\text{C}$  NMR (151 MHz,  $\text{CHCl}_3$ )  $\delta$  36.56, 53.25, 55.98, 104.85, 119.90, 122.95, 129.29, 140.21, 157.17. MS (EI)  $m/z$  calcd for 238.3; found 261.5  $[\text{M}+\text{Na}]^+$ .

### 1-(2,2-Dimethoxyethyl)-1-methyl-3-(*p*-tolyl)urea (**1b**)<sup>[2]</sup>

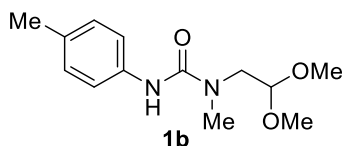

2.498 g, yield 90%, white solid, mp 65-69 °C;  $^1\text{H}$  NMR (400 MHz,  $\text{CHCl}_3$ )  $\delta$  2.29 (s, 3H,  $\text{CH}_3$ ), 3.03 (s, 3H,  $\text{CH}_3$ ), 3.43 (d, 2H,  $J = 5.0$  Hz,  $\text{CH}_2$ ), 3.50 (s, 6H,  $\text{CH}_3$ ), 4.48 (t, 1H,  $J = 5.0$  Hz, CH), 7.07 (d, 2H,  $J = 8.0$  Hz, ArH), 7.22 (d, 2H,  $J = 8.2$  Hz, ArH), 7.47 (br s, 1H, NH);  $^{13}\text{C}$  NMR (151 MHz,  $\text{CHCl}_3$ )  $\delta$  20.72, 36.06, 52.75, 55.45, 104.39, 119.55, 129.30, 131.92, 137.07, 156.76. MS (EI)  $m/z$  calcd for 252.3; found 273.1  $[\text{M}+\text{Na}]^+$ , found 291.1  $[\text{M}+\text{K}]^+$ .

### 3-(4-Chlorophenyl)-1-(2,2-dimethoxyethyl)-1-methylurea (**1c**)<sup>[2]</sup>

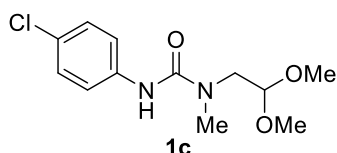

2.730 g, yield 91%, white solid, mp 68-72 °C;  $^1\text{H}$  NMR (400 MHz,  $\text{CHCl}_3$ )  $\delta$  3.03 (s, 3H,  $\text{CH}_3$ ), 3.43 (d, 2H,  $J = 5.0$  Hz,  $\text{CH}_2$ ), 3.51 (s, 6H,  $\text{CH}_3$ ), 4.48 (t, 1H,  $J = 5.0$  Hz, CH), 7.20-7.24 (m, 2H, ArH), 7.25-7.30 (m, 2H, ArH), 7.69 (br s, 1H, NH);  $^{13}\text{C}$  NMR (151 MHz,  $\text{CHCl}_3$ )  $\delta$  35.55, 52.29, 55.04, 103.81, 119.95, 126.72, 128.20, 137.83, 155.97. MS (EI)  $m/z$  calcd for 272.7; found 273.4  $[\text{M}+\text{H}]^+$ .

### 1-(2,2-Dimethoxyethyl)-3-(4-methoxyphenyl)-1-methylurea (**1d**)<sup>[2]</sup>

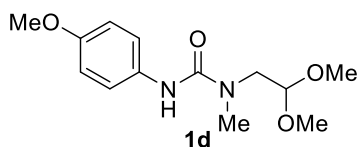

2.833 g, yield 96%, white solid, mp 50-54 °C;  $^1\text{H}$  NMR (400 MHz,  $\text{CHCl}_3$ )  $\delta$  3.00 (s, 3H,  $\text{CH}_3$ ), 3.40 (d, 2H,  $J = 5.0$  Hz,  $\text{CH}_2$ ), 3.47 (s, 6H,  $\text{CH}_3$ ), 3.75 (s, 3H,  $\text{CH}_3$ ), 4.46 (t, 1H,  $J = 5.0$  Hz, CH), 6.80 (d, 2H,  $J = 9.0$  Hz, ArH), 7.21 (d, 2H,  $J = 8.9$  Hz, ArH), 7.36 (br s, 1H, NH);  $^{13}\text{C}$  NMR (151 MHz,  $\text{CHCl}_3$ )  $\delta$  36.05, 52.61, 55.38, 55.51, 104.34, 114.08, 121.53, 132.78, 155.42, 157.00. MS (EI)  $m/z$  calcd for 268.3; found 268.9  $[\text{M}]^+$ , found 306.9  $[\text{M}+\text{K}]^+$ .

### 3-(3-Chlorophenyl)-1-(2,2-dimethoxyethyl)-1-methylurea (**1f**)<sup>[2]</sup>

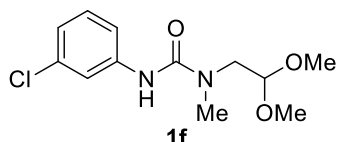

2.393 g, yield 80%, white solid, mp 85-89 °C;  $^1\text{H}$  NMR (400 MHz,  $\text{CHCl}_3$ ,  $\delta$  ppm) 3.03 (s, 3H,  $\text{CH}_3$ ), 3.42 (d, 2H,  $J = 5.0$  Hz,  $\text{CH}_2$ ), 3.31 (s, 6H,  $\text{CH}_3$ ), 4.48 (t, 1H,  $J = 4.9$  Hz, CH), 6.93-6.98 (m, 1H, ArH), 7.147.21 (m, 2H, ArH), 7.43 (s, 1H, ArH), 7.75 (br s, 1H, NH);  $^{13}\text{C}$  NMR (151 MHz,  $\text{CHCl}_3$ ,  $\delta$  ppm) 36.09, 52.82, 55.59, 104.31, 117.24, 119.28, 122.36, 129.73, 134.42, 140.99, 156.37. MS (EI)  $m/z$  calcd for 272.7; found 272.0  $[\text{M}]^+$ , found 295.0  $[\text{M}+\text{Na}]^+$ .

### 1-(2,2-Dimethoxyethyl)-1-methyl-3-(*m*-tolyl)urea (**1g**)<sup>[2]</sup>

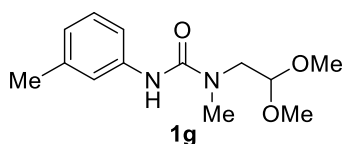

2.198 g, yield 79%, white solid, mp 71-75 °C;  $^1\text{H}$  NMR (400 MHz,  $\text{CHCl}_3$ )  $\delta$  2.32 (s, 3H,  $\text{CH}_3$ ), 3.03 (s, 3H,  $\text{CH}_3$ ), 3.43 (d, 2H,  $J = 4.7$  Hz,  $\text{CH}_2$ ), 3.50 (s, 6H,  $\text{CH}_3$ ), 4.48 (t, 1H,  $J = 4.7$  Hz, CH), 6.81 (d, 1H,  $J = 7.4$  Hz, ArH), 7.02-7.11 (m, 1H, ArH), 7.12-7.17 (m, 1H, ArH), 7.21 (s, 1H, ArH), 7.53 (br s, 1H, NH);  $^{13}\text{C}$  NMR (151 MHz,  $\text{CHCl}_3$ )  $\delta$  21.50, 36.05, 52.76, 55.47, 104.37, 116.46, 120.10, 123.30, 128.60, 138.60, 139.58, 156.67. MS (EI)  $m/z$  calcd for 252.3; found 253.1  $[\text{M}+\text{H}]^+$ , found 275.1  $[\text{M}+\text{Na}]^+$ .

### 3-(4-Bromophenyl)-1-(2,2-dimethoxyethyl)-1-methylurea (1h)

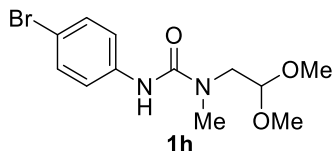

2.426 g, 45% yield, white solid, mp 61-65 °C; IR 1591, 1644, 2836, 2919.  $^1\text{H}$  NMR (400 MHz,  $\text{DMSO}-d_6$ )  $\delta$  2.99 (s, 3H,  $\text{CH}_3$ ), 3.31 (s, 6H,  $\text{OCH}_3$ ), 3.40 (d, 2H,  $J = 5.3$  Hz,  $\text{CH}_2$ ), 4.50 (t, 1H,  $J = 5.3$  Hz, CH), 7.37-7.42 (m, 2H, ArH), 7.44-7.47 (m, 2H, ArH), 8.39 (br s, 1H, NH).  $^{13}\text{C}$  NMR (151 MHz,  $\text{DMSO}-d_6$ )  $\delta$  36.31, 50.55, 54.29, 103.15, 113.65, 122.03, 131.45, 140.46, 155.75. Anal. Calcd for  $\text{C}_{12}\text{H}_{17}\text{BrN}_2\text{O}_3$ : C, 45.44; H, 5.40; Br, 25.19; N, 8.83. Found: C, 45.54; H, 5.35; Br, 25.28; N, 8.76. MS (EI)  $m/z$  calcd for 317.1; found 317.1  $[\text{M}]^+$ .

### 1-(2,2-Dimethoxyethyl)-1-methyl-3-(naphthalen-2-yl)urea (1i)

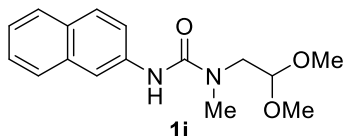

2.462 g, 61% yield, white solid, mp 61-65 °C; IR 1544, 1642, 2831, 2940.  $^1\text{H}$  NMR (400 MHz,  $\text{CDCl}_3$ )  $\delta$  3.07 (s, 3H,  $\text{CH}_3$ ), 3.49 (d, 2H,  $J = 5.0$  Hz,  $\text{CH}_2$ ), 3.53 (s, 6H,  $\text{OCH}_3$ ), 4.51 (t, 1H,  $J = 5.0$  Hz, CH), 7.31-7.43 (m, 3H, ArH), 7.71-7.76 (m, 3H, ArH), 7.84 (br s, 1H, NH), 7.93 (s, 1H, ArH).  $^{13}\text{C}$  NMR (151 MHz,  $\text{CDCl}_3$ )  $\delta$  36.64, 53.32, 56.06, 104.90, 115.65, 120.85, 124.65, 126.73, 127.80, 128.03, 128.97, 130.39, 134.71, 137.82, 157.27. Anal. Calcd for  $\text{C}_{16}\text{H}_{20}\text{N}_2\text{O}_3$ : C, 66.65; H, 6.99; N, 9.72. Found: C, 66.46; H, 7.15; N, 9.95. MS (EI)  $m/z$  calcd for 288.3; found 311.3  $[\text{M}+\text{Na}]^+$ .

### 1-(2,2-Dimethoxyethyl)-3-(9H-fluoren-2-yl)-1-methylurea (1k)

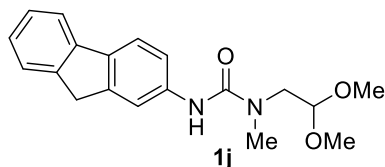

718 mg, 40% yield, yellow oil; IR 1560, 1641, 2854, 2962.  $^1\text{H}$  NMR (600 MHz,  $\text{CDCl}_3$ )  $\delta$  3.07 (s, 3H,  $\text{CH}_3$ ), 3.47 (d, 2H,  $J = 5.0$  Hz,  $\text{CH}_2$ ), 3.52 (s, 6H,  $\text{CH}_3$ ), 3.86 (s, 2H,  $\text{CH}_2$ ), 4.51 (t, 1H,  $J = 5.0$  Hz, CH), 7.19-7.28 (m, 2H, ArH), 7.35 (t, 1H,  $J = 7.5$  Hz, ArH), 7.51 (d, 1H,  $J = 7.4$  Hz, ArH), 7.64-7.72 (m, 3H, ArH), 7.79 (br s, 1H, NH).  $^{13}\text{C}$  NMR (151 MHz,  $\text{CDCl}_3$ )  $\delta$  36.13, 37.00, 52.80, 55.52, 104.36, 116.47, 118.29, 119.25, 120.00, 121.65, 124.90, 125.88, 126.68, 136.51, 138.59, 143.01, 144.32, 156.87. Anal. Calcd for  $\text{C}_{19}\text{H}_{22}\text{N}_2\text{O}_3$ : C, 69.92; H, 6.79; N, 8.58. Found: C, 69.95; H, 6.84; N, 8.44. MS (EI)  $m/z$  calcd for 326.4; found 327.8  $[\text{M}+\text{H}]^+$ .

### 1-(2,2-Dimethoxyethyl)-3-(4-fluorophenyl)-1-methylurea (1l)

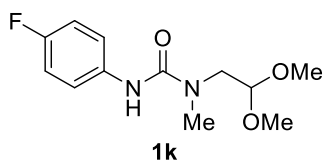

1.528 g, 67% yield, dark crystalline solid, mp 125 °C;  $^1\text{H}$  NMR (500 MHz,  $\text{CDCl}_3$ )  $\delta$  3.03 (s, 3H,  $\text{CH}_3$ ), 3.44 (d, 2H,  $J = 5.0$  Hz,  $\text{CH}_2$ ), 3.50 (s, 6H,  $\text{CH}_3$ ), 4.48 (t, 1H,  $J = 5.0$  Hz, CH), 6.92-6.97 (m, 2H, ArH), 7.23-7.27 (m, 2H, ArH), 7.62 (br s, 1H, NH).  $^{13}\text{C}$  NMR (151 MHz,  $\text{CDCl}_3$ )  $\delta$  36.11, 52.74, 55.51, 104.34, 115.36 (d,  $J = 11.0$  Hz), 120.79, 121.39, 135.58, 156.98, 158.60 (d,  $J = 241.0$  Hz). Anal. Calcd for  $\text{C}_{12}\text{H}_{17}\text{FN}_2\text{O}_3$ : C, 56.24; H, 6.69; N, 10.93. Found: C, 56.35; H, 6.54; N, 11.05. MS (EI)  $m/z$  calcd for 256.3; found 295.1  $[\text{M}+\text{K}]^+$ .

### 1-(2,2-Dimethoxyethyl)-3-phenylurea (1m)<sup>[3]</sup>

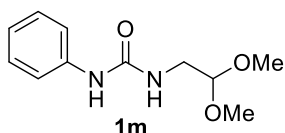

2.020 g, yield 82%, white solid, mp 66-70 °C;  $^1\text{H}$  NMR (400 MHz,  $\text{CHCl}_3$ )  $\delta$  3.41-3.45 (m, 2H,  $\text{CH}_2$ ), 3.43 (s, 6H,  $\text{CH}_3$ ), 4.44 (t, 1H,  $J = 5.1$  Hz, CH), 5.37 (s, 1H, NH), 7.02-7.10 (m, 2H, ArH), 7.30 (s, 1H, NH), 7.30-7.33 (m, 3H, ArH).  $^{13}\text{C}$  NMR (126 MHz,  $\text{CDCl}_3$ )  $\delta$  41.86, 54.54, 103.58, 120.25, 123.19, 129.04, 138.92, 156.45. MS (EI)  $m/z$  calcd for 224.2; found 247.4  $[\text{M}+\text{Na}]^+$ .

### 1-(2,2-Dimethoxyethyl)-3-(*p*-tolyl)urea (1n)<sup>[4]</sup>

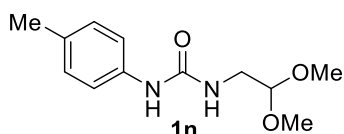

2.359 g, yield 90%, white solid, mp 69-73 °C;  $^1\text{H}$  NMR (400 MHz,  $\text{CDCl}_3$ )  $\delta$  2.28 (s, 3H,  $\text{CH}_3$ ), 3.38 (s, 6H,  $\text{CH}_3$ ), 3.34-3.40 (m, 2H,  $\text{CH}_2$ ), 4.39 (t, 1H,  $J = 5.2$  Hz, CH), 5.52 (br s, 1H, NH), 7.06 (d, 2H,  $J = 8.2$  Hz, ArH), 7.15 (br s, 1H, NH), 7.16 (d, 2H,  $J = 8.4$  Hz, ArH).  $^{13}\text{C}$  NMR (151 MHz,  $\text{CDCl}_3$ )  $\delta$  21.27, 42.41, 55.06, 104.10, 121.59, 130.20, 133.74, 136.59, 157.02. MS (EI)  $m/z$  calcd for 238.3; found 239.5  $[\text{M}+\text{H}]^+$ , found 261.2  $[\text{M}+\text{Na}]^+$ .

### 1-(2,2-Dimethoxyethyl)-3-(4-methoxyphenyl)urea (1o)<sup>[2]</sup>

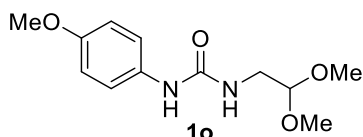

2.713 g, yield 97%, white solid, mp 68-72 °C;  $^1\text{H}$  NMR (400 MHz,  $\text{CHCl}_3$ )  $\delta$  3.39 (s, 6H,  $\text{CH}_3$ ), 3.32-3.44 (m, 2H,  $\text{CH}_2$ ), 3.77 (s, 3H,  $\text{CH}_3$ ), 4.40 (t, 1H,  $J = 5.0$  Hz, CH), 5.44 (br s, 1H, NH), 6.82 (d, 2H,  $J = 9.0$  Hz, ArH), 7.08 (br s, 1H, NH), 7.19 (d, 2H,  $J = 9.1$  Hz, ArH);  $^{13}\text{C}$  NMR (151 MHz,  $\text{CHCl}_3$ )  $\delta$  41.90, 54.53, 55.51, 103.56, 114.45, 123.49, 131.47, 156.43, 156.83. MS (EI)  $m/z$  calcd for 254.3; found 277.5  $[\text{M}+\text{Na}]^+$ .

### 1-(4-Chlorophenyl)-3-(2,2-dimethoxyethyl)urea (1p)<sup>[2]</sup>

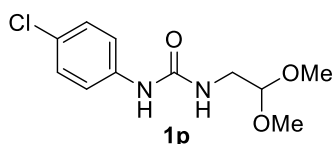

2.703 g, 95% yield, white crystalline solid, mp 73-77 °C;  $^1\text{H}$  NMR (400 MHz,  $\text{CHCl}_3$ )  $\delta$  3.41 (s, 6H,  $\text{CH}_3$ ), 3.36-3.45 (m, 2H,  $\text{CH}_2$ ), 4.40 (t, 1H,  $J = 4.7$  Hz, CH), 5.68 (br s, 1H, NH), 7.17-7.25 (m, 4H, ArH), 7.48 (br s, 1H, NH);  $^{13}\text{C}$

NMR (151 MHz, CHCl<sub>3</sub>)  $\delta$  41.87, 54.73, 103.69, 121.24, 128.18, 128.98, 137.52, 156.12. MS (EI)  $m/z$  calcd for 258.7; found 259.0 [M+H]<sup>+</sup>.

### 1-(3-Chlorophenyl)-3-(2,2-dimethoxyethyl)urea (**1q**)<sup>[2]</sup>

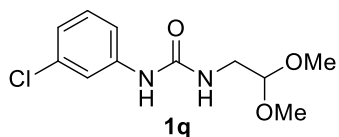

2.333 g, yield 82%, white solid, mp 60–65 °C; <sup>1</sup>H NMR (400 MHz, CHCl<sub>3</sub>)  $\delta$  3.42 (s, 6H, CH<sub>3</sub>), 3.37–3.46 (m, 2H, CH<sub>2</sub>), 4.41 (t, 1H,  $J$  = 4.9 Hz, CH), 5.77 (br s, 1H, NH), 6.96 (d, 1H,  $J$  = 7.4 Hz, ArH), 7.10–7.19 (m, 2H, ArH), 7.39 (s, 1H, ArH), 7.65 (br s, 1H, NH); <sup>13</sup>C-NMR (151 MHz, CHCl<sub>3</sub>,  $\delta$  ppm) 41.86, 54.69, 103.66, 117.59, 119.62, 122.84, 129.92, 134.56, 140.37, 155.98. MS (EI)  $m/z$  calcd for 258.7; found 281.2 [M+Na]<sup>+</sup>.

### Synthesis of 1-(4-bromobenzyl)-1-(2,2-dimethoxyethyl)-3-phenylurea (**1j**)

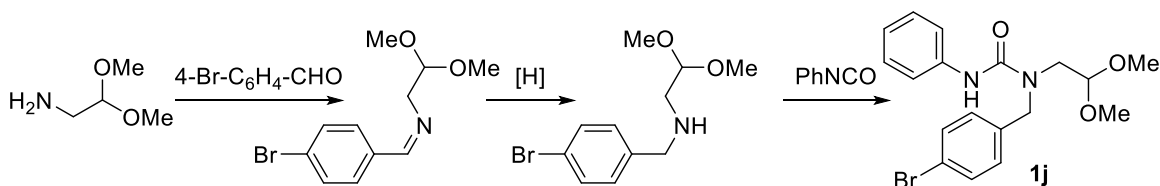

A 4-bromobenzaldehyde (3.5 g, 19 mmol, 1.0 equiv.), 2,2-dimethoxyethan-1-amine (2.0 g, 19 mmol, 1.0 equiv.) and DCM (10 mL) were placed in 25 mL flask. The reaction mixture was allowed to stir at room temperature for 10 h and then cooled to 0 °C. NaBH<sub>4</sub> (1.0 g, 28.5 mmol, 1.5 equiv.) was added slowly. The mixture was subsequently warmed to room temperature and allowed to stir for 4 h. An ice-cold distilled water was added and the organic layer was separated. The aqueous layer was extracted with DCM (3 x 10 mL). The organic layers were combined, dried over MgSO<sub>4</sub>, filtered, and concentrated under reduced pressure. The yellowish gummy residue was dissolved in benzene (10 mL) and a phenylisocyanate (2.30 g, 19 mmol, 1.0 equiv.) was added slowly at room temperature. The mixture was allowed to stir for 6 h, the volatiles were removed in vacuum to give the crude **1j** as white solid (3.964 g, 72% yield), which was used without further purification.

Mp 110 °C; IR 1538, 1653, 2946, 3308. <sup>1</sup>H NMR (400 MHz, CDCl<sub>3</sub>)  $\delta$  3.41 (d, 2H,  $J$  = 5.0 Hz, CH<sub>2</sub>), 3.45 (s, 6H, OCH<sub>3</sub>), 4.27 (t, 1H,  $J$  = 4.9 Hz, CH), 4.58 (s, 2H, CH<sub>2</sub>), 7.03 (t, 1H,  $J$  = 7.3 Hz, ArH), 7.23 (d, 2H,  $J$  = 8.4 Hz, ArH), 7.27–7.32 (m, 2H, ArH), 7.36–7.39 (m, 2H, ArH), 7.48 (d, 2H,  $J$  = 8.4 Hz, ArH), 8.07 (br s, 1H, NH). <sup>13</sup>C NMR (151 MHz, CDCl<sub>3</sub>)  $\delta$  50.77, 51.04, 55.56, 104.64, 119.37, 121.36, 122.59, 128.82, 129.74, 131.73, 137.23, 139.57, 156.80. Anal. Calcd for C<sub>18</sub>H<sub>21</sub>BrN<sub>2</sub>O<sub>3</sub>: C, 45.44; H, 5.40; Br, 25.19; N, 8.83. Found: C, 45.55; H, 5.36; Br, 25.12; N, 9.14. MS (EI)  $m/z$  calcd for 393.3; found 417.0 [M+Na]<sup>+</sup>.

### Synthesis of imidazolin-2-one **3a**

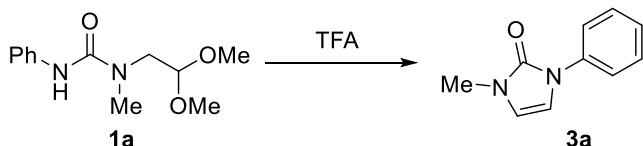

To a 25 mL flask a urea **1a** (0.50 g, 2.1 mmol, 1.0 equiv.), chloroform (10 mL) and TFA (0.28 mL, 0.353 g, 3.1 mmol, 1.5 equiv.) was added. The reaction mixture was allowed to stir at room temperature for 6 h and concentrated under reduced pressure. To the resulting yellow oily residue distilled water (15 mL) and Na<sub>2</sub>CO<sub>3</sub> (0.45 g, 4.2 mmol, 2 equiv.) was added. The precipitate was filtered off and dried under reduced pressure to give the compound **3a** as yellowish solid (329 mg, yield 90%), which was used without further purification.

Mp 103-107 °C; <sup>1</sup>H NMR (400 MHz, DMSO-*d*<sub>6</sub>) δ 3.20 (s, 3H, CH<sub>3</sub>), 6.69 (d, 1H, *J* = 3.0 Hz, CH), 6.97 (d, 1H, *J* = 3.1 Hz, CH), 7.18-7.24 (m, 1H, ArH), 7.38-7.44 (m, 2H, ArH), 7.66-7.35 (m, 2H, ArH). <sup>13</sup>C NMR (151 MHz, DMSO-*d*<sub>6</sub>) δ 30.34, 109.14, 113.99, 114.06, 116.93, 120.99, 125.49, 129.40, 137.93, 151.86. Anal. Calcd for C<sub>10</sub>H<sub>10</sub>N<sub>2</sub>O: C, 68.95; H, 5.79; N, 16.08. Found: C, 68.80; H, 5.63; N, 16.13. MS (EI) *m/z* calcd for 174.2; found 175.1 [M+H]<sup>+</sup>, 197.5 [M+Na]<sup>+</sup>.

### Synthesis of imidazolin-2-ones **3m,n,p**

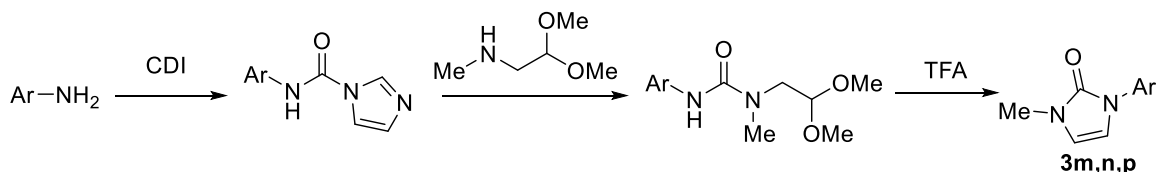

To a 25 mL flask a substituted aniline (5.4 mmol, 1.0 equiv.), chloroform (10 mL) and CDI (6.5 mmol, 1.2 equiv.) were added. The reaction mixture was allowed to stir at room temperature for 10 h. Then, 2,2-dimethoxy-*N*-methylethan-1-amine (0.94 g, 5.4 mmol, 1.0 equiv.) was added and the reaction mixture was refluxed for 10 h. The mixture was subsequently cooled to room temperature, and distilled water (10 mL) was added. The mixture was transferred to a separatory funnel and the organic layer was separated. The aqueous layer was washed with chloroform (3 x 10 mL). The organic layers were combined, dried over MgSO<sub>4</sub>, filtered, and concentrated under reduced pressure. The residue was dissolved in ethanol (10 mL) and the concentrated hydrochloric acid (39% wt., 2 mL) was added. The reaction mixture was allowed to stir at room temperature for 3 h and then concentrated under reduced pressure to give target compound **3**, which was used without further purification.

### 4-(3-Methyl-2-oxo-2,3-dihydro-1*H*-imidazol-1-yl)benzotrile (**3m**)

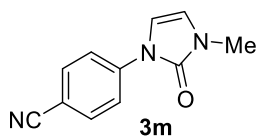

468 mg, 28% yield, white solid, mp 168-172 °C; IR 1620, 1692, 2891, 2978. <sup>1</sup>H NMR (500 MHz, CDCl<sub>3</sub>) δ 3.32 (s, 3H, CH<sub>3</sub>), 6.40 (d, 1H, *J* = 3.2 Hz, CH), 6.63 (d, 1H, *J* = 3.2 Hz, CH), 7.68-7.71 (m, 2H, ArH), 7.81-7.84 (m, 2H, ArH). <sup>13</sup>C NMR (151 MHz, CDCl<sub>3</sub>) δ 30.38, 107.53, 108.35, 114.06, 118.38, 120.42, 133.13, 140.95, 151.64. Anal. Calcd for C<sub>11</sub>H<sub>9</sub>N<sub>3</sub>O: C, 66.32; H, 4.55; N, 21.09. Found: C, 66.25; H, 4.72; N, 21.15. MS (EI) *m/z* calcd for 199.2; found 238.5 [M+K]<sup>+</sup>.

### 1-Methyl-3-(3,4,5-trimethoxyphenyl)-1,3-dihydro-2*H*-imidazol-2-one (**3n**)

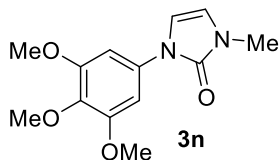

910 mg, 63% yield, white solid, mp 144-148 °C; IR 1510, 1706, 2874, 2950. <sup>1</sup>H NMR (400 MHz, DMSO-*d*<sub>6</sub>) δ 3.19 (s, 3H, CH<sub>3</sub>), 3.66 (s, 3H, OCH<sub>3</sub>), 3.79 (s, 6H, OCH<sub>3</sub>), 6.71 (d, 1H, *J* = 3.1 Hz, CH), 7.02 (s, 2H, ArH), 7.04 (d, 1H, *J* = 3.1 Hz, CH). <sup>13</sup>C NMR (151 MHz, DMSO-*d*<sub>6</sub>) δ 30.92, 57.00, 61.09, 99.68, 110.16, 114.20, 134.41, 135.94, 152.33, 153.97. Anal. Calcd for C<sub>13</sub>H<sub>16</sub>N<sub>2</sub>O<sub>4</sub>: C, 59.08; H, 6.10; N, 10.60. Found: C, 59.19; H, 6.18; N, 10.74. MS (EI) *m/z* calcd for 264.3; found 265.7 [M+H]<sup>+</sup>.

### 1-(2-Fluorophenyl)-3-methyl-1,3-dihydro-2*H*-imidazol-2-one (**3p**)

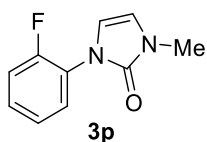

325 mg, 65% yield, brown oil; IR 1318, 1470, 1682, 2881, 2985.  $^1\text{H}$  NMR (600 MHz,  $\text{CDCl}_3$ )  $\delta$  3.42 (s, 3H,  $\text{CH}_3$ ), 6.45 (d, 1H,  $J = 2.9$  Hz, CH), 6.55 (d, 1H,  $J = 2.4$  Hz, CH), 7.19-7.25 (m, 2H, ArH), 7.35-7.39 (m, 1H, ArH), 7.49-7.53 (m, 1H, ArH).  $^{13}\text{C}$  NMR (151 MHz,  $\text{CDCl}_3$ )  $\delta$  31.26, 112.83, 113.59, 116.95 (d,  $J = 19.6$  Hz), 123.31, 124.79, 124.87 ( $J = 4.1$  Hz), 128.04, 130.08 (d,  $J = 7.7$  Hz), 156.74 (d,  $J = 251.9$  Hz). Anal. Calcd for  $\text{C}_{10}\text{H}_9\text{FN}_2\text{O}$ : C, 62.49; H, 4.72; N, 14.58. Found: C, 62.53; H, 4.82; N, 14.50. MS (EI)  $m/z$  calcd for 192.2; found 215.7 [ $\text{M}+\text{Na}$ ] $^+$ .

### Synthesis of imidazolin-2-one **3o**

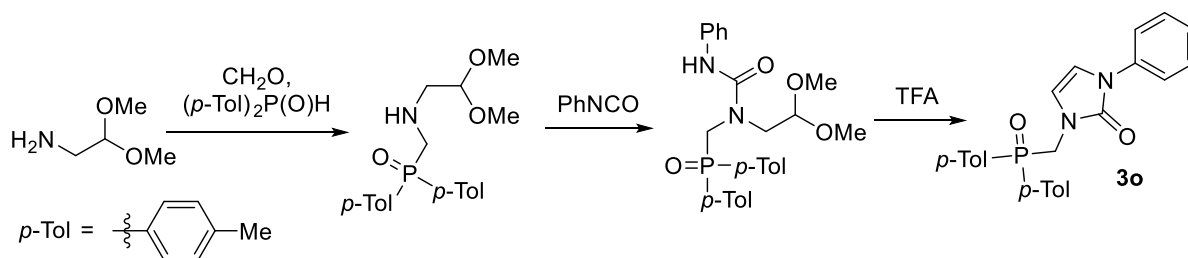

To a 100 mL flask a 2,2-dimethoxyethan-1-amine (1.0 g, 9.5 mmol, 1.0 equiv.), di-*p*-tolylphosphine oxide (1.0 g, 9.5 mmol, 1.0 equiv.), paraform (0.3 g, 9.5 mmol, 1.0 equiv.), *p*-toluenesulfonic acid (0.082 g, 0.475 mmol, 0.05 equiv.) and benzene (30 mL) were added. The mixture was refluxed with Dean-Stark apparatus for 14 h, allowed to cool to room temperature and washed with saturated  $\text{NaHCO}_3$  solution (3 x 10 mL). The organic layer was separated, dried over  $\text{MgSO}_4$  and concentrated under reduced pressure. The resulting yellow oil was dissolved in benzene (10 mL), a phenylisocyanate (1.10 g, 9.5 mmol, 1.0 equiv.) was added and the reaction mixture was allowed to stir at room temperature for 10 h. Then, a TFA (1.09 mL, 1.62 g, 14.25 mmol, 1.5 equiv.) was added and the reaction mixture was allowed to stir at room temperature for additional 6 h. The volatiles were removed in vacuum to give the crude compound **3d** as brown oil (2.49 g, 65% yield), which was used without further purification.

IR 1120, 1554, 1673, 2958, 3023.  $^1\text{H}$  NMR (400 MHz,  $\text{CDCl}_3$ )  $\delta$  2.42 (s, 6H,  $\text{CH}_3$ ), 4.73 (d, 2H,  $J = 5.4$  Hz,  $\text{CH}_2$ ), 6.55 (d, 1H,  $J = 2.2$  Hz, CH), 6.89 (d, 1H,  $J = 3.1$  Hz, CH), 7.32-7.41 (m, 8H, ArH), 7.68-7.79 (m, 5H, ArH).  $^{31}\text{P}$  NMR (161.5 MHz,  $\text{CDCl}_3$ )  $\delta$  35.04.  $^{13}\text{C}$  NMR (151 MHz,  $\text{CDCl}_3$ )  $\delta$  21.57, 43.06 (d,  $J = 76.2$  Hz), 111.28, 112.63, 122.46, 129.91 (d,  $J = 12.8$  Hz), 131.25 (d,  $J = 10.7$  Hz), 136.37, 144.23, 151.43.  $^{31}\text{P}$  NMR (162 MHz,  $\text{CDCl}_3$ )  $\delta$  31.32. Anal. Calcd for  $\text{C}_{24}\text{H}_{23}\text{N}_2\text{O}_2\text{P}$ : C, 71.63; H, 5.76; N, 6.96; P, 7.70. Found: C, 71.77; H, 5.64; N, 7.03; P, 7.71. MS (EI)  $m/z$  calcd for 402.4; found 403.5 [ $\text{M}+\text{H}$ ] $^+$ .

### Reaction conditions optimization

The reaction conditions were screened using various Lewis and Bronsted acid catalysts and solvents.  $\text{AlCl}_3$  was found to be completely unsuitable for this reaction (Table S1, entries 2,3). Boron trifluoride provided the desired compounds **2a** in 40% yield at room temperature (Table S1, entry 9). However, the yield lowered to 6% upon refluxing the reaction mixture (Table S1, entry 8). Among the Bronsted acids, the triflic acid in refluxing *o*-xylene performed the best, providing the desired octahydro-diimidazoquinolines **endo-2a** and **exo-2a** in 98% yield and 85 : 15 *dr* (Table S1, entry 7). Interestingly, lower reaction temperatures improved the *dr* up to 95 : 5. However, a lot of unidentified byproducts were formed and the yield dropped to 27% (Table S1, entry 6). The same *dr* was achieved when acetic acid was used as solvent, albeit the yield was only 35% (Table S1, entry 14). Chiral (1*S*)-(+)-10-camphorsulfonic and (1*R*)-(-)-10-camphorsulfonic acids provided the octahydro-diimidazoquinolines **endo-2a** and **exo-2a** in low yields and almost identical *dr* (Table S1, entries 10,12).

**Table S1.** Reaction conditions optimization<sup>a</sup>
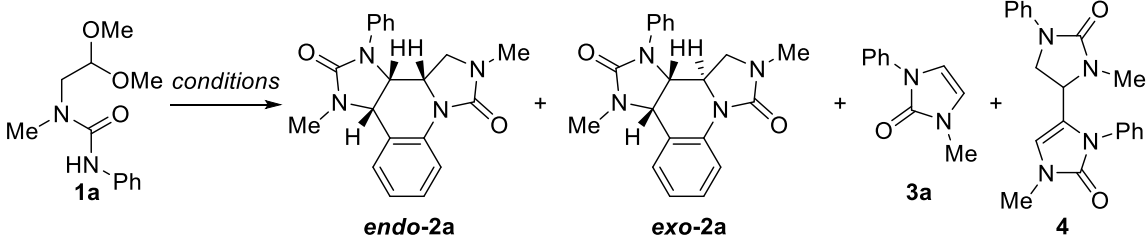

The reaction scheme shows urea **1a** (1-methoxy-N-methyl-N-phenylethan-1-amine-2-ylidene) reacting under various conditions to produce a mixture of **endo-2a**, **exo-2a**, **3a**, and **4**. **endo-2a** and **exo-2a** are diastereomeric octahydro-diimidazoquinolines. **3a** is an imidazolinone, and **4** is a 4,4'-bi(imidazole-2-one).

| No | catalyst                           | solvent                | ratio ( <i>endo-2a</i> + <i>exo-2a</i> ) / <b>3a</b> / <b>4</b> , % <sup>b</sup> | <i>dr</i> <sup>b</sup> ( <i>endo</i> : <i>exo</i> ) |
|----|------------------------------------|------------------------|----------------------------------------------------------------------------------|-----------------------------------------------------|
| 1  | HCl(conc)                          | -                      | 5 / 81 / 13                                                                      | 1 : 1                                               |
| 2  | AlCl <sub>3</sub>                  | toluene                | 0 / 0 / 0                                                                        | -                                                   |
| 3  | AlCl <sub>3</sub>                  | water                  | 0 / 0 / 0                                                                        | -                                                   |
| 4  | TFA                                | toluene                | 0 / 98 / 0                                                                       | -                                                   |
| 5  | TFA                                | water                  | 0 / 0 / 0                                                                        | -                                                   |
| 6  | TfOH                               | toluene                | 27 / 0 / 0 <sup>c</sup>                                                          | > 95 : 5                                            |
| 7  | <b>TfOH</b>                        | <b><i>o</i>-xylene</b> | <b>98 / 0 / 0</b>                                                                | <b>85 : 15</b>                                      |
| 8  | BF <sub>3</sub> *Et <sub>2</sub> O | toluene                | 6 / 53 / 40                                                                      | 67 : 33                                             |
| 9  | BF <sub>3</sub> *Et <sub>2</sub> O | toluene <sup>d</sup>   | 40 / 0 / 0 <sup>c</sup>                                                          | 85 : 15                                             |
| 10 | +CSA                               | toluene                | 6 / 75 / 18                                                                      | 84 : 16                                             |
| 11 | +CSA                               | water                  | 0 / 93 / 6                                                                       | -                                                   |
| 12 | -CSA                               | toluene                | 6 / 75 / 18                                                                      | 85 : 15                                             |
| 13 | -CSA                               | water                  | 0 / 94 / 5                                                                       | -                                                   |
| 14 | AcOH                               | -                      | 35 / 47 / 17                                                                     | > 95 : 5                                            |

<sup>a</sup> Reaction conditions: urea **1a** (2.1 mmol), catalyst (10% mol.), solvent (5 mL), reflux, 10 h; <sup>b</sup> According to <sup>1</sup>H NMR data;

<sup>c</sup> A lot of unidentified products were observed; <sup>d</sup> Reaction was carried out at rt

### Isolation of the 4,4'-bi(imidazole-2-one) **4**

Compound **4** was isolated from the reaction mixture (Table S1, entry 1) as follows. First, the solvent was removed in vacuum. The dark residue was thoroughly washed with cold acetone and the precipitate of **exo-2a** and **endo-2a** was filtered off. The filtrate was evaporated and washed multiple times with distilled water and diethyl ether to give **4** as white crystalline solid with 3% isolated yield. Alternative synthesis of this compound was achieved after multiple attempts starting from urea **1a** (see page S20).

### Synthesis of octahydro-diimidazoquinolines **2**

The compounds **2a-i,m-o** were obtained as described below. In case of compound **endo-2e**, the intermediate urea **1e** was not isolated and the reaction was carried in one-pot manner starting from *p*-isopropylaniline and 2,2-dimethoxy-*N*-methylethan-1-amine (see page S13). In case of ureas **1l** and **1k** the reaction resulted in imidazolinones **3l** and **3k**.



## General method for synthesis of octahydro-diimidazoquinolines 2a-i,m-o

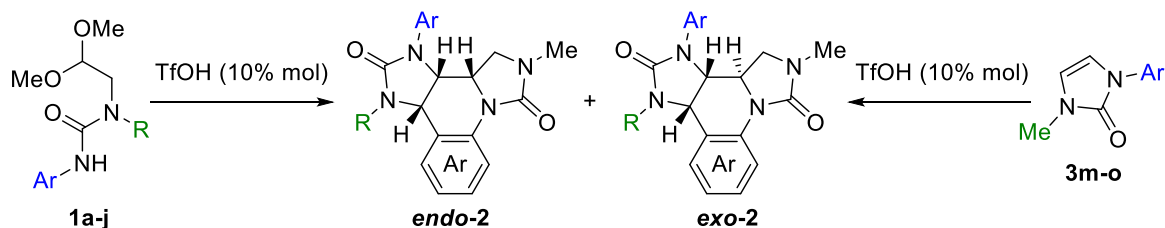

To a 10 mL flask a 1-(2,2-dimethoxyethyl)urea **1a-d,f-l** (2.1 mmol, 1.0 equiv.) or imidazolin-2-one **3m-p** (2.1 mmol, 1.0 equiv.), *o*-xylene (5 mL) and triflic acid (31.53 mg, 0.21 mmol, 0.1 equiv.) were added. The reaction mixture was refluxed for 10 h and cooled to room temperature. The volatiles were removed in vacuum. The resulting dark residue was washed with diethyl ether (2 x 10 mL) and recrystallized multiple times from dry acetone to give the compounds **2** as a pure *exo*- or *endo*-diastereomer.

### (3a*R*,3b*R*,11b*R*)-1,5-Dimethyl-3-phenyl-1,3a,3b,4,5,11b-hexahydro-2*H*-diimidazo[1,5-*a*:4',5'-*c*]quinoline-2,6(3*H*)-dione (*endo*-**2a**)

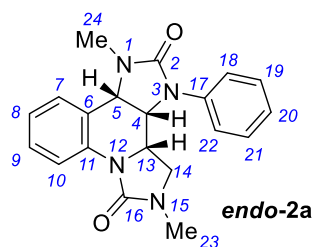

259 mg, 74% yield, white solid, mp 124-128 °C; IR 1492, 1701, 2889, 2929. <sup>1</sup>H NMR (500 MHz, DMSO-*d*<sub>6</sub>) δ 2.459 (s, 3H, H<sup>24</sup>), 2.509 (s, 3H, H<sup>23</sup>), 2.758 (dd, *J* = 8.8 Hz, *J* = 9.1 Hz, 1H, H<sup>14</sup> (*trans* to H<sup>13</sup>)), 3.278 (dd, *J* = 8.8 Hz, *J* = 9.0 Hz, 1H, H<sup>14</sup> (*cis* to H<sup>13</sup>)), 3.985 (dd, *J* = 4.3 Hz, *J* = 9.1 Hz, 1H, H<sup>13</sup>), 4.890 (d, *J* = 9.5 Hz, 1H, H<sup>5</sup>), 5.277 (dd, *J* = 4.3 Hz, *J* = 9.5 Hz, 1H, H<sup>4</sup>), 7.106 (t, *J* = 7.6 Hz 1H, H<sup>8</sup>), 7.136 (m, 1H, H<sup>20</sup>), 7.362 (t, *J* = 7.6 Hz 1H, H<sup>9</sup>), 7.434 (d, *J* = 7.5 Hz, 2H, H<sup>19/21</sup>), 7.440 (td, *J* = 1.4 Hz, *J* = 7.6 Hz, 1H, H<sup>7</sup>), 7.554 (d, *J* = 7.7 Hz, 2H, H<sup>18/22</sup>), 7.982 (dd, *J* = 1.4 Hz, *J* = 7.6 Hz, 1H, H<sup>10</sup>). <sup>13</sup>C NMR (126 MHz, DMSO-*d*<sub>6</sub>) δ 28.3 (C<sup>23</sup>), 30.1 (C<sup>24</sup>), 45.6 (C<sup>14</sup>), 54.8 (C<sup>13</sup>), 55.5 (C<sup>5</sup>), 56.2 (C<sup>4</sup>), 117.8 (C<sup>10</sup>), 120.4 (C<sup>18/22</sup>), 122.2 (C<sup>8</sup>), 123.5 (C<sup>20</sup>), 123.6 (C<sup>6</sup>), 128.7 (C<sup>19/21</sup>), 128.8 (C<sup>9</sup>), 130.5 (C<sup>7</sup>), 139.3 (C<sup>11</sup>), 140.6 (C<sup>17</sup>), 156.2 (C<sup>16</sup>), 157.6 (C<sup>2</sup>). <sup>15</sup>N NMR (51 MHz, DMSO-*d*<sub>6</sub>) δ 102.6 (N<sup>12</sup>), 102.0 (N<sup>3</sup>), 87.1 (N<sup>1</sup>), 77.5 (N<sup>15</sup>). Anal. Calcd for C<sub>20</sub>H<sub>20</sub>N<sub>4</sub>O<sub>2</sub>: C, 68.95; H, 5.79; N, 16.08. Found: C, 68.86; H, 5.90; N, 15.86. MS (EI) *m/z* calcd for 348.4; found 349.6 [M+H]<sup>+</sup>.

### (3a*S*,3b*R*,11b*S*)-1,5-Dimethyl-3-phenyl-3,3a,4,5-tetrahydro-1*H*-diimidazo[1,5-*a*:4',5'-*c*]quinoline-2,6(3b*H*,11b*H*)-dione (*exo*-**2a**)

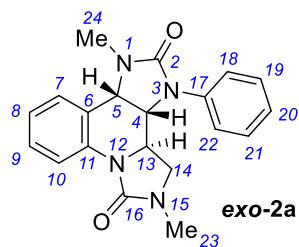

54 mg, 15% yield, white solid, mp 158-162 °C; IR 1492, 1702, 2876, 2913. <sup>1</sup>H NMR (500 MHz, DMSO-*d*<sub>6</sub>) δ 2.590 (s, 3H, H<sup>23</sup>), 2.785 (s, 3H, H<sup>24</sup>), 2.863 (dd, *J* = 8.6 Hz, *J* = 8.8 Hz, 1H, H<sup>14</sup> (*trans* to H<sup>13</sup>)), 2.892 (dd, *J* = 8.6 Hz, *J* = 9.0 Hz, 1H, H<sup>14</sup> (*cis* to H<sup>13</sup>)), 3.993 (m, *J* = 9.9 Hz, *J* = 8.9 Hz, 1H, H<sup>13</sup>), 4.610 (d, *J* = 6.8 Hz, 1H, H<sup>5</sup>), 4.782 (dd, *J* = 6.8 Hz, *J* = 9.9 Hz, 1H, H<sup>4</sup>), 7.081 (td, *J* = 7.7 Hz, *J* = 1.2 Hz, 1H, H<sup>8</sup>), 7.184 (t, *J* = 7.5 Hz, 1H, H<sup>20</sup>), 7.372 (m, 1H, H<sup>9</sup>), 7.389 (t, *J* = 7.5 Hz, 2H, H<sup>19/21</sup>), 7.477 (td, *J* = 7.7 Hz, *J* = 1.4 Hz, 1H, H<sup>7</sup>), 7.604 (d, *J* = 7.5 Hz, 2H, H<sup>18/22</sup>), 8.328 (dd, *J* = 7.7 Hz, *J* = 1.4 Hz, 1H, H<sup>10</sup>). <sup>13</sup>C NMR (126 MHz, DMSO-*d*<sub>6</sub>) δ 29.3 (C<sup>23</sup>), 30.4 (C<sup>24</sup>), 48.1

(C<sup>14</sup>), 51.0 (C<sup>13</sup>), 54.5 (C<sup>4</sup>), 55.5 (C<sup>5</sup>), 117.1 (C<sup>10</sup>), 119.0 (C<sup>6</sup>), 121.3 (C<sup>8</sup>), 122.7 (C<sup>18/22</sup>), 124.6 (C<sup>20</sup>), 128.8 (C<sup>19/21</sup>), 129.0 (C<sup>9</sup>), 131.5 (C<sup>7</sup>), 136.9 (C<sup>11</sup>), 138.5 (C<sup>17</sup>), 156.1 (C<sup>16</sup>), 157.2 (C<sup>2</sup>). <sup>15</sup>N NMR (51 MHz, DMSO-*d*<sub>6</sub>) δ 106.6 (N<sup>3</sup>), 101.6 (N<sup>12</sup>), 91.9 (N<sup>1</sup>), 76.6 (N<sup>15</sup>). Anal. Calcd for C<sub>20</sub>H<sub>20</sub>N<sub>4</sub>O<sub>2</sub>: C, 68.95; H, 5.79; N, 16.08. Found: C, 68.87; H, 5.88; N, 15.86. MS (EI) *m/z* calcd for 348.4; found 387.4 [M+K]<sup>+</sup>.

**(3a*S*,3b*S*,11b*S*)-1,5,10-Trimethyl-3-(*p*-tolyl)-3,3a,4,5-tetrahydro-1*H*-diimidazo[1,5-*a*:4',5'-*c*]quinoline-2,6(3b*H*,11b*H*)-dione (endo-2b)**

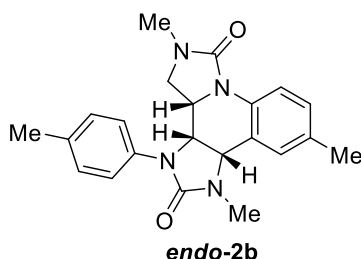

79 mg, 20% yield, white solid, mp 176-180 °C; IR 1511, 1694, 2866, 2920. <sup>1</sup>H NMR (400 MHz, DMSO-*d*<sub>6</sub>) δ 2.29 (s, 3H, CH<sub>3</sub>), 2.31 (s, 3H, CH<sub>3</sub>), 2.47 (s, 3H, CH<sub>3</sub>), 2.51 (s, 3H, CH<sub>3</sub>), 2.71-2.77 (m, 1H, CH<sub>2</sub>), 3.20-3.26 (m, 1H, CH<sub>2</sub>), 3.90-3.96 (m, 1H, CH), 4.82 (d, 1H, *J* = 9.5 Hz, CH), 4.78 (dd, 1H, 1H, *J* = 9.5 Hz, *J* = 4.2 Hz, CH), 7.13-7.19 (m, 3H, ArH), 7.24 (s, 1H, ArH), 7.41 (d, 2H, *J* = 8.2 Hz, ArH), 7.84 (d, 1H, *J* = 8.3 Hz, ArH). <sup>13</sup>C NMR (126 MHz, DMSO-*d*<sub>6</sub>) δ 20.86, 20.92, 28.87, 30.72, 46.10, 55.41, 56.11, 56.78, 118.24, 121.15, 123.99, 129.71, 129.79, 131.26, 131.72, 133.11, 137.26, 138.66, 156.86, 158.31. Anal. Calcd for C<sub>22</sub>H<sub>24</sub>N<sub>4</sub>O<sub>2</sub>: C, 70.19; H, 6.43; N, 14.88. Found: C, 70.30; H, 6.58; N, 14.88. MS (EI) *m/z* calcd for 376.5; found 399.5 [M+Na]<sup>+</sup>.

**(3a*S*,3b*S*,11b*S*)-10-Chloro-3-(4-chlorophenyl)-1,5-dimethyl-3,3a,4,5-tetrahydro-1*H*-diimidazo[1,5-*a*:4',5'-*c*]quinoline-2,6(3b*H*,11b*H*)-dione (endo-2c)**

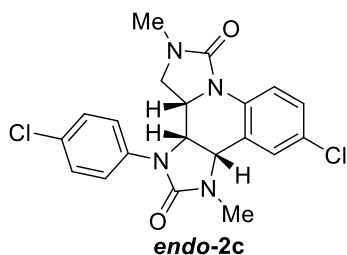

109 mg, 25% yield, white solid, mp 174-178 °C; IR 1595, 1713, 2880, 2958. <sup>1</sup>H NMR (400 MHz, DMSO-*d*<sub>6</sub>) δ 2.49 (s, 3H, CH<sub>3</sub>), 2.55 (s, 3H, CH<sub>3</sub>), 2.71-2.79 (m, 1H, CH<sub>2</sub>), 3.26-3.31 (m, 1H, CH<sub>2</sub>), 3.95-4.03 (m, 1H, CH), 4.91 (d, 1H, *J* = 9.5 Hz, CH), 5.28 (dd, 1H, 1H, *J* = 9.5 Hz, *J* = 4.3 Hz, CH), 7.41-7.45 (m, 3H, ArH), 7.58-7.62 (m, 3H, ArH), 8.02 (d, 1H, *J* = 8.8 Hz, ArH). <sup>13</sup>C NMR (151 MHz, DMSO-*d*<sub>6</sub>) δ 28.81, 30.68, 46.10, 55.33, 55.54, 56.53, 119.88, 122.27, 126.05, 126.49, 127.83, 129.11, 129.29, 130.52, 138.81, 139.91, 156.58, 157.79. Anal. Calcd for C<sub>20</sub>H<sub>18</sub>Cl<sub>2</sub>N<sub>4</sub>O<sub>2</sub>: C, 57.57; H, 4.35; Cl, 16.99; N, 13.43. Found: C, 57.75; H, 4.64; Cl, 17.09; N, 13.26. MS (EI) *m/z* calcd for 417.3; found 439.1 [M+Na]<sup>+</sup>.

**(3a*R*,3b*R*,11b*R*)-10-Methoxy-3-(4-methoxyphenyl)-1,5-dimethyl-1,3a,3b,4,5,11b-hexahydro-2*H*-diimidazo[1,5-*a*:4',5'-*c*]quinoline-2,6(3*H*)-dione (endo-2d)**

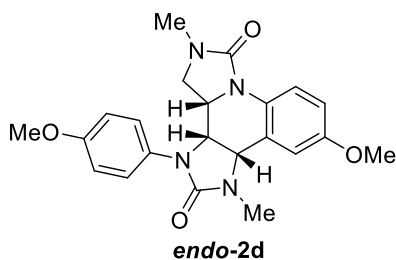

150 mg, 35% yield, white solid, mp 204-208 °C; IR 1508, 1692, 2838, 2934. <sup>1</sup>H NMR (600 MHz, DMSO-*d*<sub>6</sub>) δ 2.47 (s, 3H, CH<sub>3</sub>), 2.56 (s, 3H, CH<sub>3</sub>), 2.68-2.74 (m, 1H, CH<sub>2</sub>), 3.89-3.97 (m, 1H, CH<sub>2</sub>), 4.54-4.58 (m, 1H, CH), 4.86 (d, 1H, *J* = 9.4 Hz, CH), 5.11 (dd, 1H, *J* = 9.7, *J* = 3.4 Hz, CH), 6.98-6.91 (m, 4H, ArH), 7.36 (d, 2H, *J* = 8.7 Hz, ArH), 7.82 (d, 1H, *J* = 8.9 Hz, ArH). <sup>13</sup>C NMR (151 MHz, DMSO-*d*<sub>6</sub>) δ 29.06, 30.63, 45.73, 54.90, 55.75, 55.79, 55.93, 56.04, 57.41, 114.44, 114.66, 115.90, 119.94, 124.34, 125.40, 125.92, 132.55, 134.13, 154.86, 156.67, 156.85, 158.73. Anal. Calcd for C<sub>22</sub>H<sub>24</sub>N<sub>4</sub>O<sub>4</sub>: C, 64.69; H, 5.92; N, 13.72; O, 15.67. Found: C, 64.75; H, 6.08; N, 13.85; O, 15.32. MS (EI) *m/z* calcd for 408.4; found 408.2 [M]<sup>+</sup>.

**(3*a*S,3*b*S,11*b*S)-10-Isopropyl-3-(4-isopropylphenyl)-1,5-dimethyl-3,3*a*,4,5-tetrahydro-1*H*-diimidazo[1,5-*a*:4',5'-*c*]quinoline-2,6(3*b*H,11*b*H)-dione (endo-2e)**

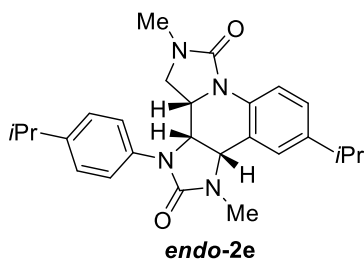

To a 25 mL flask a *p*-isopropylaniline (0.32 g, 2.4 mmol, 1 equiv.) and DCM (10 mL) was added. Then, a CDI (0.42 g, 2.6 mmol, 1.08 equiv.) was slowly added and the reaction mixture was allowed to stir at room temperature for 10 h. Next, 2,2-dimethoxy-*N*-methylethan-1-amine (0.29 g, 2.4 mmol, 1 equiv.) was added dropwise and the reaction mixture was refluxed for 14 h. The solvent was removed under reduced pressure. The resulting white residue was dissolved in ethanol (15 mL) and concentrated hydrochloric acid (39% wt., 15 mL) was added. The reaction mixture was refluxed for 72 h. The dark brown precipitate was filtered off, washed with distilled water (3 x 15 mL) and recrystallized multiple times from anhydrous DMF to give the compound **endo-2e** (240 mg, 46% yield) as white solid.

Mp 180-184 °C; IR 1513, 1702, 2959, 3312. <sup>1</sup>H NMR (600 MHz, DMSO-*d*<sub>6</sub>) δ 1.20-1.24 (m, 12H, CH<sub>3</sub>), 2.46 (s, 3H, CH<sub>3</sub>), 2.49 (s, 3H, CH<sub>3</sub>), 2.71-2.76 (m, 1H, CH<sub>2</sub>), 2.86-2.93 (m, 2H, CH), 3.23-3.29 (m, 1H, CH<sub>2</sub>), 3.95-4.02 (m, 1H, CH), 4.87 (d, 1H, *J* = 9.4 Hz, CH), 5.16 (dd, 1H, 1H, *J* = 9.6 Hz, *J* = 3.8 Hz, CH), 7.20-7.27 (m, 3H, ArH), 7.29 (s, 1H, ArH), 7.40 (d, 2H, *J* = 8.5 Hz, ArH), 7.83 (d, 1H, *J* = 8.3 Hz, ArH). <sup>13</sup>C NMR (151 MHz, DMSO-*d*<sub>6</sub>) δ 24.33, 24.36, 24.47, 24.54, 28.86, 30.54, 33.28, 33.36, 45.94, 54.90, 56.18, 57.14, 118.54, 121.83, 123.97, 126.94, 127.10, 128.55, 137.18, 138.86, 142.80, 144.50, 156.71, 158.46. Anal. Calcd for C<sub>26</sub>H<sub>32</sub>N<sub>4</sub>O<sub>2</sub>: C, 72.19; H, 7.46; N, 12.95. Found: C, 80.19; H, 7.68; N, 12.75. MS (EI) *m/z* calcd for 432.6; found 433.2 [M+H]<sup>+</sup>.

**(3*a*S,3*b*S,11*b*R)-9-Chloro-3-(3-chlorophenyl)-1,5-dimethyl-1,3*a*,3*b*,4,5,11*b*-hexahydro-2*H*-imidazo[4,5-*c*]pyrrolo[1,2-*a*]quinoline-2,6(3*H*)-dione (exo-2f)**

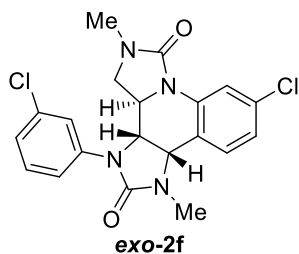

114 mg, 26% yield, white solid, mp 144-148 °C; IR 1595, 1713, 2878, 2915. <sup>1</sup>H NMR (600 MHz, DMSO-*d*<sub>6</sub>) δ 2.44 (s, 3H, CH<sub>3</sub>), 2.58 (s, 3H, CH<sub>3</sub>), 2.75-2.80 (m, 1H, CH<sub>2</sub>), 3.31-3.32 (m, 1H, CH<sub>2</sub>), 4.00-4.03 (m, 1H, CH), 4.92 (d, 1H, *J* = 9.4 Hz, CH), 5.30 (dd, *J* = 9.5, *J* = 4.5 Hz, 1H), 7.14-7.18 (m, 2H, ArH), 7.36-7.40 (m, 1H, ArH), 7.43-7.46 (m, 1H, ArH), 8.06 (d, 1H, *J* = 2.1 Hz, ArH), 7.82 (s, 1H, ArH), 8.07 (s, 1H, ArH). <sup>13</sup>C NMR (151 MHz, DMSO-*d*<sub>6</sub>) δ 28.73, 30.68, 31.16, 46.19, 55.51, 56.37, 117.79, 118.54, 119.93, 122.58, 122.78, 123.54, 130.84, 132.73,

133.84, 134.10, 141.20, 142.49, 156.55, 157.71. Anal. Calcd for C<sub>20</sub>H<sub>18</sub>Cl<sub>2</sub>N<sub>4</sub>O<sub>2</sub>: C, 57.57; H, 4.35; Cl, 16.99; N, 13.43. Found: C, 57.62; H, 4.15; Cl, 17.15; N, 13.26. MS (EI) *m/z* calcd for 417.3; found 440.7 [M+Na]<sup>+</sup>.

**(3*aR*,3*bS*,11*bR*)-1,5,9-Trimethyl-3-(*m*-tolyl)-1,3*a*,3*b*,4,5,11*b*-hexahydro-2*H*-diimidazo[1,5-*a*:4',5'-*c*]quinoline-2,6(3*H*)-dione (*exo*-2*g*)**

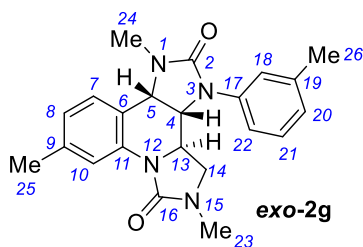

162 mg, 41% yield, white solid, mp 134-138 °C; IR 1494, 1671, 2923, 3033. <sup>1</sup>H NMR (500 MHz, DMSO-*d*<sub>6</sub>) δ 2.304 (s, 3H, H<sup>25</sup>), 2.315 (s, 3H, H<sup>26</sup>), 2.592 (s, 3H, H<sup>23</sup>), 2.758 (s, 3H, H<sup>24</sup>), 2.87 (dd, *J* = 8.9 Hz, *J* = 9.0 Hz, 1H, H<sup>14</sup> (*trans* to H<sup>13</sup>)), 3.984 (dd, *J* = 8.5 Hz, *J* = 9.0 Hz, 1H, H<sup>14</sup> (*cis* to H<sup>13</sup>)), 3.932 (dd, *J* = 9.0 Hz, *J* = 9.9 Hz, 1H, H<sup>13</sup>), 4.545 (d, *J* = 6.8 Hz, 1H, H<sup>5</sup>), 4.720 (dd, *J* = 6.8 Hz, *J* = 9.9 Hz, 1H, H<sup>4</sup>), 6.901 (dd, *J* = 7.8 Hz, *J* = 1.5 Hz, 1H, H<sup>8</sup>), 6.983 (d, *J* = 7.5 Hz, 1H, H<sup>20</sup>), 7.258 (t, *J* = 7.5 Hz, 1H, H<sup>21</sup>), 7.346 (d, *J* = 7.8 Hz 1H, H<sup>7</sup>), 7.361 (d, *J* = 7.5 Hz, 1H, H<sup>22</sup>), 7.454 (m, 1H, H<sup>18</sup>), 8.158 (d, *J* = 1.4 Hz, 1H, H<sup>10</sup>). <sup>13</sup>C NMR (126 MHz, DMSO-*d*<sub>6</sub>) δ 21.1 (C<sup>26</sup>), 21.2 (C<sup>25</sup>), 29.2 (C<sup>24</sup>), 30.4 (C<sup>23</sup>), 48.0 (C<sup>14</sup>), 51.1 (C<sup>13</sup>), 54.6 (C<sup>4</sup>), 54.9 (C<sup>5</sup>), 116.3 (C<sup>6</sup>), 117.4 (C<sup>10</sup>), 119.8 (C<sup>22</sup>), 122.2 (C<sup>8</sup>), 123.3 (C<sup>18</sup>), 125.2 (C<sup>20</sup>), 128.6 (C<sup>21</sup>), 131.3 (C<sup>7</sup>), 136.8 (C<sup>11</sup>), 138.1 (C<sup>19</sup>), 138.4 (C<sup>9</sup>), 138.4 (C<sup>17</sup>), 156.1 (C<sup>16</sup>), 157.1 (C<sup>2</sup>). <sup>15</sup>N NMR (51 MHz, DMSO-*d*<sub>6</sub>) δ 101.8 (N<sup>12</sup>), 101.0 (N<sup>3</sup>), 92.1 (N<sup>1</sup>), 76.3 (N<sup>15</sup>). Anal. Calcd for C<sub>22</sub>H<sub>24</sub>N<sub>4</sub>O<sub>2</sub>: C, 70.19; H, 6.43; N, 14.88. Found: C, 70.30; H, 6.58; N, 14.88. MS (EI) *m/z* calcd for 376.5; found 377.2 [M+H]<sup>+</sup>.

**(3*aR*,3*bR*,11*bR*)-9-Bromo-3-(4-bromophenyl)-1,5-dimethyl-1,3*a*,3*b*,4,5,11*b*-hexahydro-2*H*-diimidazo[1,5-*a*:4',5'-*c*]quinoline-2,6(3*H*)-dione (*endo*-2*h*)**

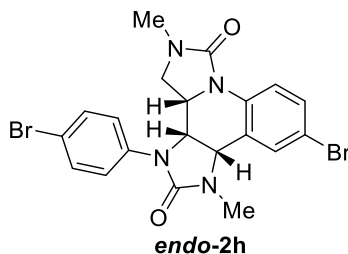

202 mg, 38% yield, white solid, mp 127-131 °C; IR 1493, 1703, 2952, 3067. <sup>1</sup>H NMR (500 MHz, DMSO-*d*<sub>6</sub>) δ 2.46 (s, 3H, CH<sub>3</sub>), 2.55 (s, 3H, CH<sub>3</sub>), 2.72-2.77 (m, 1H, CH<sub>2</sub>), 3.30-3.33 (m, 1H, CH<sub>2</sub>), 3.94-4.00 (m, 1H, CH), 4.90 (d, 1H, *J* = 9.4 Hz, CH), 5.27 (dd, 1H, *J* = 9.5, *J* = 4.4 Hz, CH), 7.53-7.55 (m, 4H, ArH), 7.55-7.57 (m, 1H, ArH), 7.70 (d, 1H, *J* = 2.4 Hz, ArH), 7.96 (d, 1H, *J* = 8.8 Hz, ArH). <sup>13</sup>C NMR (151 MHz, DMSO-*d*<sub>6</sub>) δ 28.25, 30.16, 45.61, 54.81, 54.93, 55.93, 113.84, 115.26, 119.66, 121.88, 125.90, 131.48, 131.58, 131.67, 132.83, 138.77, 139.82, 156.03, 157.18. Anal. Calcd for C<sub>20</sub>H<sub>18</sub>Br<sub>2</sub>N<sub>4</sub>O<sub>2</sub>: C, 47.46; H, 3.58; Br, 31.57; N, 11.07. Found: C, 47.55; H, 3.70; Br, 31.35; N, 11.05. MS (EI) *m/z* calcd for 506.2; found 529.3 [M+Na]<sup>+</sup>.

**(3*aR*,3*bS*,11*bR*)-9-Bromo-3-(4-bromophenyl)-1,5-dimethyl-1,3*a*,3*b*,4,5,11*b*-hexahydro-2*H*-diimidazo[1,5-*a*:4',5'-*c*]quinoline-2,6(3*H*)-dione (*exo*-2*h*)**

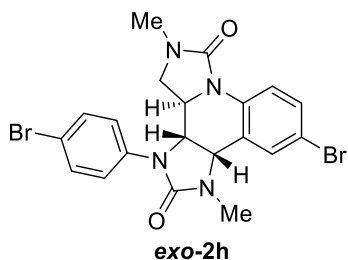

111 mg, 21% yield, white solid, mp 126-129 °C; IR 1514, 1715, 2961, 3052. <sup>1</sup>H NMR (400 MHz, DMSO-*d*<sub>6</sub>) δ 2.81 (s, 3H, CH<sub>3</sub>), 2.86 (s, 3H, CH<sub>3</sub>), 3.61-3.67 (m, 2H, CH<sub>2</sub>), 4.09-4.14 (m, 1H, CH), 4.26 (d, 1H, *J* = 8.3 Hz, CH), 5.73 (d, 1H, *J* = 8.3 Hz, CH), 6.89 (d, 1H, *J* = 2.3 Hz, ArH), 7.29-7.34 (m, 2H, ArH), 7.52-7.59 (m, 3H, ArH), 7.76-7.80 (m, 1H, ArH). <sup>13</sup>C NMR (151 MHz, DMSO-*d*<sub>6</sub>) δ 31.37, 33.06, 46.39, 53.04, 54.69, 59.43, 114.31, 117.83, 121.54, 127.14, 127.46, 131.81, 132.26, 132.65, 137.80, 138.58, 157.06, 159.44. Anal. Calcd for C<sub>20</sub>H<sub>18</sub>Br<sub>2</sub>N<sub>4</sub>O<sub>2</sub>: C, 47.46; H, 3.58; Br, 31.57; N, 11.07. Found: C, 47.38; H, 3.72; Br, 31.22; N, 11.15. MS (EI) *m/z* calcd for 506.2; found 529.7 [M+Na]<sup>+</sup>.

**(3*aR*,3*bS*,13*bR*)-1,5-Dimethyl-3-(naphthalen-2-yl)-1,3*a*,3*b*,4,5,13*b*-hexahydro-2*H*-benzo[*g*]diimidazo[1,5-*a*:4',5'-*c*]quinoline-2,6(3*H*)-dione (exo-2i)**

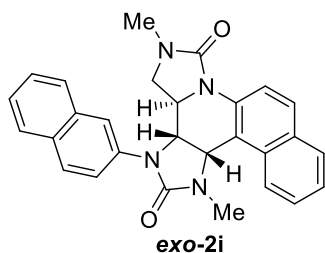

113 mg, 51% yield, white solid, mp <250 °C; IR 1474, 1691, 2874, 2992. <sup>1</sup>H NMR (400 MHz, DMSO-*d*<sub>6</sub>) δ 2.61 (s, 3H, CH<sub>3</sub>), 2.66 (s, 3H, CH<sub>3</sub>), 2.98-3.04 (m, 1H, CH<sub>2</sub>), 3.08-3.13 (m, 1H, CH<sub>2</sub>), 4.23-4.31 (m, 1H, CH), 5.00 (dd, 1H, *J* = 9.9, *J* = 5.9 Hz, CH), 5.65 (d, 1H, *J* = 6.0 Hz, CH), 7.43-7.62 (m, 5H, ArH), 7.86 (d, 1H, *J* = 8.6 Hz, ArH), 7.90-7.99 (m, 6H, ArH), 8.24 (d, 1H, *J* = 1.9 Hz, ArH), 8.32 (d, 1H, *J* = 8.6 Hz, ArH), 8.71 (d, 1H, *J* = 9.1 Hz, ArH). <sup>13</sup>C NMR (151 MHz, DMSO-*d*<sub>6</sub>) δ 30.30, 30.97, 48.23, 50.93, 51.33, 54.77, 111.32, 117.96, 119.02, 121.98, 123.93, 124.50, 125.59, 127.02, 127.34, 127.84, 128.02, 129.02, 129.08, 129.45, 130.24, 130.49, 133.62, 133.83, 136.68, 137.08, 156.72, 157.50. Anal. Calcd for C<sub>28</sub>H<sub>24</sub>N<sub>4</sub>O<sub>2</sub>: C, 74.98; H, 5.39; N, 12.49. Found: C, 75.08; H, 5.45; N, 12.38. MS (EI) *m/z* calcd for 448.5; found 449.5 [M+H]<sup>+</sup>; found 471.5 [M+H]<sup>+</sup>.

**(3*aS*,3*bR*,11*bS*)-3,5-bis(4-bromobenzyl)-1-phenyl-1,3*a*,3*b*,4,5,11*b*-hexahydro-2*H*-diimidazo[1,5-*a*:4',5'-*c*]quinoline-2,6(3*H*)-dione (exo-2j)**

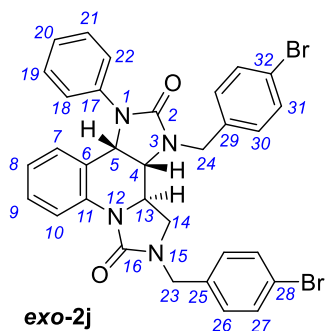

138 mg, 20% yield, white solid, mp <250 °C; IR 1498, 1696, 2875, 2924. <sup>1</sup>H NMR (400 MHz, DMSO-*d*<sub>6</sub>) δ 2.84 (dd, *J* = 7.9 Hz, *J* = 7.8 Hz, 1H, H<sup>14</sup> (*trans* to H<sup>13</sup>)), 3.03 (dd, *J* = 8.6 Hz, *J* = 8.7 Hz, 1H, H<sup>14</sup> (*cis* to H<sup>13</sup>)), 4.20 (m, *J* = 9.8 Hz, *J* = 8.7 Hz, 1H, H<sup>13</sup>), 4.19 (d, *J* = 16.9 Hz, 1H, H<sup>23</sup>), 4.28 (d, *J* = 16.9 Hz, 1H, H<sup>23</sup>), 4.39 (d, *J* = 16.8 Hz, 1H, H<sup>24</sup>), 4.68 (d, *J* = 16.8 Hz, 1H, H<sup>24</sup>), 4.82 (d, *J* = 6.6 Hz, 1H, H<sup>5</sup>), 4.88 (dd, *J* = 6.7 Hz, *J* = 9.8 Hz, 1H, H<sup>4</sup>), 6.97 (t, *J* = 7.5 Hz, 1H, H<sup>8</sup>), 7.10-7.18 (m, 1H, H<sup>20</sup>), 7.10-7.18 (m, 4H, H<sup>26</sup>, H<sup>30</sup>), 7.21 (d, *J* = 7.8 Hz, 1H, H<sup>7</sup>), 7.31 (t, *J* = 7.6 Hz, 2H, H<sup>19/21</sup>), 7.26-7.38 (m, 1H, H<sup>9</sup>), 7.49 (d, *J* = 8.1 Hz, 2H, H<sup>27</sup>), 7.52 (d, *J* = 8.0 Hz, 2H, H<sup>31</sup>), 7.59 (d, *J* = 8.0 Hz, 2H, H<sup>18/22</sup>), 8.19 (d, *J* = 8.4 Hz, 1H, H<sup>10</sup>). <sup>13</sup>C NMR (100 MHz, DMSO-*d*<sub>6</sub>) δ 44.7 (C<sup>24</sup>), 45.5 (C<sup>14</sup>), 46.4 (C<sup>23</sup>), 51.6 (C<sup>13</sup>), 53.6 (C<sup>5</sup>), 54.5 (C<sup>4</sup>), 118.5 (C<sup>10</sup>), 119.6 (C<sup>6</sup>), 120.3 (C<sup>32</sup>), 120.8 (C<sup>28</sup>), 122.3 (C<sup>8</sup>), 122.8 (C<sup>18/22</sup>), 124.9 (C<sup>20</sup>), 129.3 (C<sup>19/21</sup>), 129.5 (C<sup>9</sup>), 129.7 (C<sup>26</sup>), 130.2 (C<sup>30</sup>), 131.7 (C<sup>7</sup>), 131.8 (C<sup>31</sup>), 131.9 (C<sup>27</sup>), 136.7 (C<sup>11</sup>), 137.1 (C<sup>29</sup>), 138.9 (C<sup>25</sup>), 138.9 (C<sup>17</sup>), 156.3 (C<sup>16</sup>), 157.6 (C<sup>2</sup>). Anal. Calcd for C<sub>32</sub>H<sub>26</sub>Br<sub>2</sub>N<sub>4</sub>O<sub>2</sub>: C, 58.38; H, 3.98; Br, 24.27; N, 8.51. Found: C, 58.44; H, 4.06; Br, 24.21; N, 8.56. MS (EI) *m/z* calcd for 658.4; found 681.3 [M+Na]<sup>+</sup>.

**(3a*S*,3b*S*,11b*R*)-10-cyano-3-(4-cyanophenyl)-1,5-dimethyl-1,3a,3b,4,5,11b-hexahydro-2*H*-imidazo[4,5-*c*]pyrrolo[1,2-*a*]quinoline-2,6(3*H*)-dione (exo-2m)**

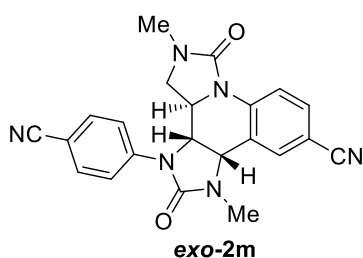

The compound **exo-2m** was obtained from imidazolinone **3m**. 87 mg, 21% yield, white solid, mp <250 °C; IR 1507, 1711, 2224, 2917. <sup>1</sup>H NMR (400 MHz, DMSO-*d*<sub>6</sub>) δ 2.68 (s, 3H, CH<sub>3</sub>), 2.81 (s, 3H, CH<sub>3</sub>), 3.12-3.22 (m, 2H, CH<sub>2</sub>), 4.05-4.11 (m, 1H, CH), 4.73 (d, 1H, *J* = 6.5 Hz, CH), 5.09 (dd, *J* = 9.9, *J* = 6.6 Hz, 1H), 7.82-7.86 (m, 3H, ArH), 7.90-7.93 (m, 2H, ArH), 8.01 (d, 1H, *J* = 8.8 Hz, ArH), 8.58 (d, 1H, *J* = 8.8 Hz, ArH). <sup>13</sup>C NMR (126 MHz, DMSO-*d*<sub>6</sub>) δ 28.78, 30.36, 47.73, 52.48, 50.97, 54.17, 102.92, 105.35, 116.91, 118.87, 119.02, 120.53, 133.21, 136.01, 141.19, 142.84, 155.53, 156.09. Anal. Calcd for C<sub>22</sub>H<sub>18</sub>N<sub>6</sub>O<sub>2</sub>: C, 66.32; H, 4.55; N, 21.09. Found: C, 66.43; H, 4.58; N, 21.15. MS (EI) *m/z* calcd for 398.4; found 421.4 [M+Na]<sup>+</sup>.

**(3a*S*,3b*S*,11b*S*)-10-isocyano-3-(4-isocyanophenyl)-1,5-dimethyl-1,3a,3b,4,5,11b-hexahydro-2*H*-imidazo[4,5-*c*]pyrrolo[1,2-*a*]quinoline-2,6(3*H*)-dione (endo-2m)**

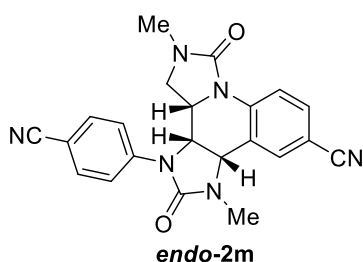

The compound **endo-2m** was obtained from imidazolinone **3m**. 65 mg, 15% yield, white solid, mp <250 °C; IR 1510 1722, 2251, 2964. <sup>1</sup>H NMR (600 MHz, DMSO-*d*<sub>6</sub>) δ 2.28 (s, 3H, CH<sub>3</sub>), 2.30 (s, 3H, CH<sub>3</sub>), 2.69-2.74 (m, 1H, CH<sub>2</sub>), 3.21-3.25 (m, 1H, CH<sub>2</sub>), 3.87-3.94 (m, 1H, CH), 4.82 (d, 1H, *J* = 9.5 Hz, CH), 5.19 (dd, 1H, *J* = 9.5, *J* = 4.3 Hz, CH), 7.13-7.18 (m, 4H, ArH), 7.40 (d, 2H, *J* = 8.1 Hz, ArH), 7.82 (d, 1H, *J* = 8.3 Hz, ArH). <sup>13</sup>C NMR (151 MHz, DMSO-*d*<sub>6</sub>) δ 20.33, 20.39, 28.34, 30.17, 45.55, 54.86, 55.57, 56.26, 117.73, 120.67, 123.46, 129.19, 129.27, 130.73, 131.21, 132.63, 136.71, 138.11, 156.35, 157.81. Anal. Calcd for C<sub>22</sub>H<sub>18</sub>N<sub>6</sub>O<sub>2</sub>: C, 66.32; H, 4.55; N, 21.09. Found: C, 66.20; H, 4.35; N, 21.09. MS (EI) *m/z* calcd for 398.4; found 400.1 [M+H]<sup>+</sup>.

**(3a*S*,3b*S*,11b*R*)-9,10,11-Trimethoxy-1,5-dimethyl-3-(3,4,5-trimethoxyphenyl)-1,3a,3b,4,5,11b-hexahydro-2*H*-imidazo[4,5-*c*]pyrrolo[1,2-*a*]quinoline-2,6(3*H*)-dione (exo-2n)**

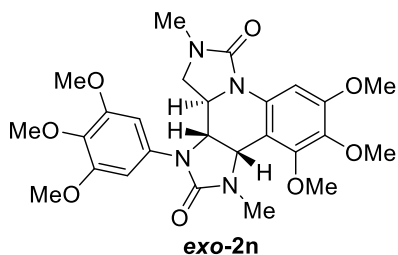

The compound **exo-2n** was obtained from imidazolinone **3n**. 110 mg, 20% yield, white solid, mp <250 °C; IR 1521, 1688, 2841, 2954. <sup>1</sup>H NMR (400 MHz, DMSO-*d*<sub>6</sub>) δ 2.63 (s, 3H, CH<sub>3</sub>), 2.68 (s, 3H, CH<sub>3</sub>), 2.92-2.98 (m, 1H, CH), 3.08-3.15 (m, 1H, CH<sub>2</sub>), 3.66 (s, 3H, CH<sub>3</sub>), 3.74 (s, 3H, CH<sub>3</sub>), 3.77 (s, 6H, CH<sub>3</sub>), 3.78 (s, 3H, CH<sub>3</sub>), 3.89 (s, 3H, CH<sub>3</sub>), 3.93-4.01 (m, 1H, CH), 4.60-4.67 (m, 1H, CH), 4.75 (d, 1H, *J* = 6.1 Hz, CH), 6.95 (s, 2H, ArH), 7.94 (s, 1H, ArH). <sup>13</sup>C NMR (151 MHz, DMSO-*d*<sub>6</sub>) δ 29.82, 30.96, 48.36, 51.04, 51.29, 55.08, 56.13, 56.48, 60.66, 61.04,

61.32, 97.00, 100.98, 104.96, 134.07, 134.81, 135.17, 136.25, 153.29, 154.27, 156.85, 157.56. Anal. Calcd for C<sub>26</sub>H<sub>32</sub>N<sub>4</sub>O<sub>8</sub>: C, 59.08; H, 6.10; N, 10.60. Found: C, 59.20; H, 6.16; N, 10.75. MS (EI) *m/z* calcd for 527.6; found 527.4 [M]<sup>+</sup>.

**(3aR,3bR,11bR)-1,5-Bis((di-*p*-tolylphosphoryl)methyl)-3-phenyl-1,3a,3b,4,5,11b-hexahydro-2H-diimidazo[1,5-a:4',5'-c]quinoline-2,6(3H)-dione (*endo*-2o)**

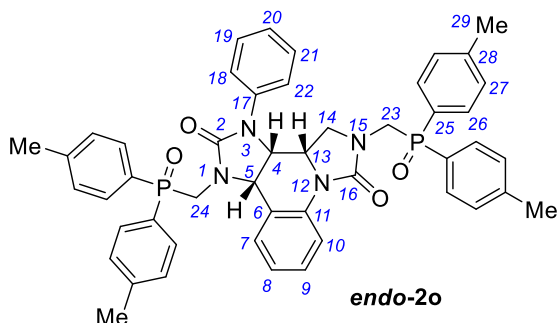

The compound **endo-2o** was obtained from imidazolinone **3o**. 186 mg, 22% yield, white solid, mp 173-177°C; IR 1443, 1697, 2870, 2919. <sup>1</sup>H NMR (500 MHz, DMSO-*d*<sub>6</sub>) δ 2.287, 2.315, 2.338 and 2.368 (s, 12H, CH<sup>29</sup>), 2.799 (dd, *J* = 8.8 Hz, *J* = 9.0 Hz, 1H, H<sup>14</sup> (*trans* to H<sup>13</sup>)), 3.394 (dd, *J* = 8.9 Hz, *J* = 9.0 Hz, 1H, H<sup>14</sup> (*cis* to H<sup>13</sup>)), 3.068, 4.433 (m, 2H, H<sup>24</sup>), 3.396, 4.361 (m, 2H, H<sup>23</sup>), 3.868 (dd, *J* = 8.8 Hz, *J* = 3.8 Hz, 1H, H<sup>13</sup>), 5.065 (dd, *J* = 9.4 Hz, *J* = 3.8 Hz, 1H, H<sup>4</sup>), 5.441 (d, *J* = 9.4 Hz, 1H, H<sup>5</sup>), 7.008 (td, *J* = 7.5 Hz, *J* = 1.1 Hz, 1H, H<sup>8</sup>), 7.153 (t, *J* = 7.5 Hz, 1H, H<sup>20</sup>), 7.260 (t, *J* = 7.5 Hz, 1H, H<sup>19/21</sup>), 7.287-7.374 (m, 8H, H<sup>27</sup>), 7.325 (m, 1H, H<sup>9</sup>), 7.470 (d, *J* = 7.5 Hz, 1H, H<sup>7</sup>), 7.507-7.570 (m, 8H, H<sup>26</sup>), 7.574 (d, *J* = 7.5 Hz, 1H, H<sup>18/22</sup>), 7.835 (d, *J* = 7.5 Hz, 1H, H<sup>10</sup>). <sup>13</sup>C NMR (126 MHz, DMSO-*d*<sub>6</sub>) δ 21.0 (C<sup>29</sup>), 40.6 (d, *J*(CP) = 80.3 Hz, C<sup>24</sup>), 43.3 (d, *J*(CP) = 81.5 Hz, C<sup>23</sup>), 44.7 (C<sup>14</sup>), 53.7 (C<sup>13</sup>), 53.6 (C<sup>5</sup>), 55.0 (C<sup>4</sup>), 117.8 (C<sup>10</sup>), 120.9 (C<sup>18/22</sup>), 122.4 (C<sup>8</sup>), 122.6 (C<sup>6</sup>), 124.1 (C4-Ar), 128.4 (d, *J*(CP) = 98.4 Hz, C<sup>25</sup>), 129.0 (C<sup>19/21</sup>), 129.1 (C<sup>9</sup>), 130.9, 130.4 (d, *J*(CP) = 4.4 Hz, C<sup>26</sup>), 130.9, 130.4 (d, *J*(CP) = 9.8 Hz, C<sup>26</sup>), 131.0 (C<sup>7</sup>), 138.8 (C<sup>11</sup>), 140.1 (C<sup>17</sup>), 142.2, 142.0 (C<sup>28</sup>), 155.6 (C<sup>16</sup>), 156.6 (C<sup>2</sup>). <sup>31</sup>P NMR (161.5 MHz, DMSO-*d*<sub>6</sub>) δ 25.83, 28.05. Anal. Calcd for C<sub>48</sub>H<sub>46</sub>N<sub>4</sub>O<sub>4</sub>P<sub>2</sub>: C, 71.63; H, 5.76; N, 6.96; P, 7.70. Found: C, 71.72; H, 5.82; N, 6.76; P, 7.78. MS (EI) *m/z* calcd for 804.8; found 827.4 [M+Na]<sup>+</sup>.

**1-(4-Fluorophenyl)-3-Methyl-1,3-dihydro-2H-imidazol-2-one (3l)**

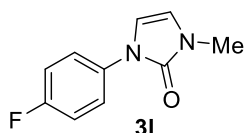

350 mg, 70% yield, brown oil; IR 1320, 458, 1690, 2863, 2990. <sup>1</sup>H NMR (400 MHz, CDCl<sub>3</sub>) δ 3.40 (s, 3H, CH<sub>3</sub>), 6.42 (d, 1H, *J* = 2.9 Hz, CH), 6.57 (d, 1H, *J* = 2.9 Hz, CH), 7.11-7.17 (m, 2H, ArH), 7.47-7.52 (m, 2H, ArH). <sup>13</sup>C NMR (151 MHz, CDCl<sub>3</sub>) δ 30.95, 110.76, 113.33, 161.21 (d, *J* = 247.2 Hz), 124.74 (d, *J* = 8.5 Hz), 127.79, 132.57, 132.57, 152.10, 161.21 (d, *J* = 247.2 Hz). Anal. Calcd for C<sub>10</sub>H<sub>9</sub>FN<sub>2</sub>O: C, 62.49; H, 4.72; N, 14.58. Found: C, 62.36; H, 4.85; N, 14.62. MS (EI) *m/z* calcd for 192.2; found 193.6 [M+H]<sup>+</sup>.

**1-(9H-Fluoren-2-yl)-3-methyl-1,3-dihydro-2H-imidazol-2-one (3k)**

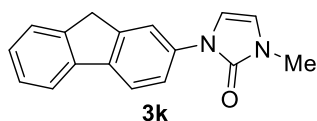

410 mg, 60% yield, mp 148-152 °C; IR 1525, 1761, 2870, 2943. <sup>1</sup>H NMR (600 MHz, CDCl<sub>3</sub>) δ 3.22 (s, 3H, CH<sub>3</sub>), 3.96 (s, 2H, CH<sub>2</sub>), 6.75 (d, 1H, *J* = 3.0 Hz, CH), 7.07 (d, 1H, *J* = 3.1 Hz, CH), 7.29-7.32 (m, 1H, ArH), 7.36-7.40 (m, 1H, ArH), 7.59 (d, 1H, *J* = 7.4 Hz, ArH), 7.71-7.74 (m, 1H, ArH), 7.89 (d, 1H, *J* = 7.5 Hz, ArH), 7.94 (d, 1H, *J* = 8.3 Hz, ArH), 7.95 (s, 1H, ArH). <sup>13</sup>C NMR (151 MHz, DMSO-*d*<sub>6</sub>) δ 31.03, 37.57, 109.97, 114.56, 118.50, 120.33,

120.90, 121.31, 126.11, 127.58, 127.82, 137.34, 139.07, 141.57, 144.05, 144.91, 152.45. Anal. Calcd for C<sub>17</sub>H<sub>14</sub>N<sub>2</sub>O: C, 77.84; H, 5.38; N, 10.68. Found: C, 77.90; H, 5.33; N, 10.72. MS (EI) *m/z* calcd for 262.3; found 263.3 [M+H]<sup>+</sup>.

## Synthesis of the 4,4'-bi(imidazole-2-one) derivatives 5

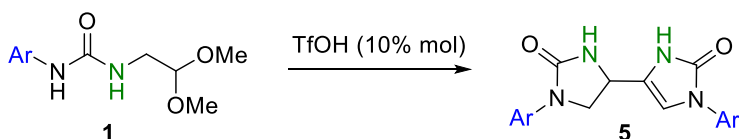

To a 10 mL flask a 1-(2,2-dimethoxyethyl)urea **1m-q** (2.2 mmol, 1.0 equiv.), *o*-xylene (5 mL) and triflic acid (32.99 mg, 0.22 mmol, 0.1 equiv.) were added. The reaction mixture was refluxed for 10 h and cooled to room temperature. The volatiles were removed in vacuum. The resulting dark residue was washed with diethyl ether (2 x 10 mL) and recrystallized from dry acetone to give the compounds **5**.

### 4-(2-Oxo-1-phenylimidazolidin-4-yl)-1-phenyl-1,3-dihydro-2H-imidazol-2-one (5a)

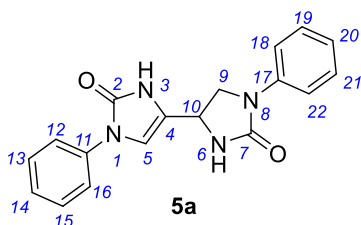

256 mg, 80% yield, white solid, mp <250 °C; IR 1578, 1680, 2891, 2994. <sup>1</sup>H NMR (500 MHz, DMSO-*d*<sub>6</sub>) δ 3.827 (dd, *J* = 7.8 Hz, *J* = 9.4 Hz, 1H, H<sup>9</sup> (*cis* to H<sup>10</sup>)), 4.092 (dd, *J* = 8.6 Hz, *J* = 9.4 Hz, 1H, H<sup>9</sup> (*trans* to H<sup>10</sup>)), 4.708 (dd, *J* = 7.8 Hz, *J* = 8.6 Hz, 1H, H<sup>10</sup>), 7.00 (tr, *J* = 7.3 Hz 1H, H<sup>20</sup>), 7.036 (m, 1H, H<sup>5</sup>), 7.211 (tr, *J* = 7.7 Hz, 1H, H<sup>14</sup>), 7.315 (tr, *J* = 7.3 Hz 2H, H<sup>21/19</sup>), 7.382 (s, 1H, NH<sup>6</sup>), 7.211 (tr, *J* = 7.7 Hz, 2H, H<sup>13/15</sup>), 7.577 (d, *J* = 7.3 Hz 2H, H<sup>22/18</sup>), 7.690 (d, *J* = 7.7 Hz, 2H, H<sup>12/16</sup>), 10.64 (s, 1H, NH<sup>3</sup>). <sup>13</sup>C NMR (126 MHz, DMSO-*d*<sub>6</sub>) δ 44.5 (C<sup>10</sup>), 49.0 (C<sup>9</sup>), 107.6 (C<sup>5</sup>), 117.2 (C<sup>18/22</sup>), 120.3 (C<sup>12/16</sup>), 121.7 (C<sup>20</sup>), 122.2 (C<sup>4</sup>), 124.9 (C<sup>14</sup>), 128.5 (C<sup>19/21</sup>), 129.0 (C<sup>13/15</sup>), 137.2 (C<sup>11</sup>), 140.4 (C<sup>17</sup>), 152.2 (C<sup>2</sup>), 157.8 (C<sup>7</sup>). <sup>15</sup>N NMR (51 MHz, DMSO-*d*<sub>6</sub>) δ 143.5 (N<sup>1</sup>), 128.8 (N<sup>3</sup>), 101.0 (N<sup>8</sup>), 92.0 (N<sup>6</sup>). Anal. Calcd for C<sub>18</sub>H<sub>16</sub>N<sub>4</sub>O<sub>2</sub>: C, 67.49; H, 5.03; N, 17.49. Found: C, 67.65; H, 5.14; N, 17.67. MS (EI) *m/z* calcd for 320.1; found 342.8 [M+Na]<sup>+</sup>.

### 4-(2-Oxo-1-(*p*-tolyl)imidazolidin-4-yl)-1-(*p*-tolyl)-1,3-dihydro-2H-imidazol-2-one (5b)

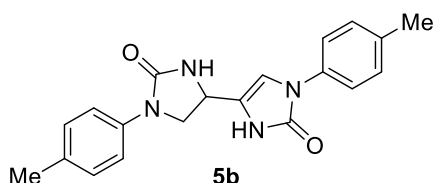

178 mg, 46% yield, white solid, mp 90-94 °C; IR 1643, 1699, 2873, 2968. <sup>1</sup>H NMR (500 MHz, DMSO-*d*<sub>6</sub>) δ 2.25 (s, 3H, CH<sub>3</sub>), 2.30 (s, 3H, CH<sub>3</sub>), 3.74-3.83 (m, 1H, CH<sub>2</sub>), 3.99-4.09 (m, 1H, CH<sub>2</sub>), 4.64-4.72 (m, 1H, CH), 7.12 (d, 2H, *J* = 8.3 Hz, ArH), 7.22 (d, 2H, *J* = 8.2 Hz, ArH), 7.28 (s, 1H, CH), 7.50 (d, 2H, *J* = 8.3 Hz, ArH), 7.56 (d, 2H, *J* = 8.3 Hz, ArH), 10.58 (s, NH), 10.81 (s, NH). <sup>13</sup>C NMR (151 MHz, DMSO-*d*<sub>6</sub>) δ 20.74, 20.89, 45.04, 49.59, 108.16, 106.17, 117.78, 120.81, 121.02, 129.39, 129.87, 135.29, 135.96, 138.42, 152.69, 158.37. Anal. Calcd for C<sub>20</sub>H<sub>20</sub>N<sub>4</sub>O<sub>2</sub>: C, 68.95; H, 5.79; N, 16.08. Found: C, 69.15; H, 5.98; N, 15.85. MS (EI) *m/z* calcd for 348.1; found 387.5 [M+K]<sup>+</sup>.

### 1-(4-Methoxyphenyl)-4-(1-(4-methoxyphenyl)-2-oxoimidazolidin-4-yl)-1H-imidazol-2(3H)-one (5c)



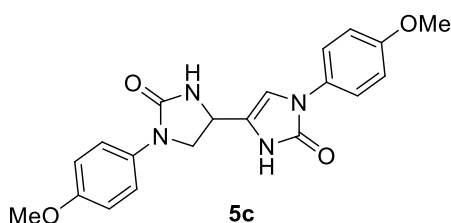

209 mg, 50% yield, white solid, mp 92-96 °C; IR 1670, 1692, 2757, 2920. <sup>1</sup>H NMR (600 MHz, DMSO-*d*<sub>6</sub>) δ 3.32 (s, 3H, CH<sub>3</sub>), 3.45-3.50 (m, 1H, CH<sub>2</sub>), 3.74 (s, 3H, CH<sub>3</sub>), 3.99-4.03 (m, 1H, CH<sub>2</sub>), 4.35-4.40 (m, 1H, CH), 5.49-5.53 (m, 1H, CH), 6.12 (d, 1H, *J* = 2.9 Hz, ArH), 6.72-6.76 (m, 1H, ArH), 6.92 (d, 2H, *J* = 8.9 Hz, ArH), 7.10-7.17 (m, 3H, ArH), 7.82 (s, 1H, NH). <sup>13</sup>C NMR (151 MHz, DMSO) δ 39.09, 53.13, 54.70, 55.17, 55.81, 56.80, 113.83, 114.47, 114.73, 120.08, 125.66, 127.55, 130.94, 131.49, 153.83, 157.07, 158.61, 159.48. Anal. Calcd for C<sub>20</sub>H<sub>20</sub>N<sub>4</sub>O<sub>4</sub>: C, 63.15; H, 5.30; N, 14.73. Found: C, 63.22; H, 5.27; N, 14.88. MS (EI) *m/z* calcd for 380.4; found 381.4 [M+H]<sup>+</sup>.

**1-(4-Chlorophenyl)-4-(1-(4-chlorophenyl)-2-oxoimidazolidin-4-yl)-1H-imidazol-2(3H)-one (5d)**

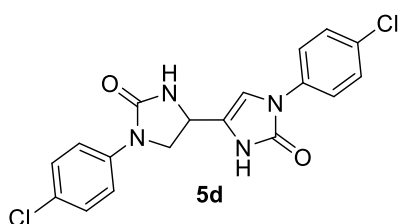

231 mg, 54% yield, white solid, mp 92-96 °C; IR 1683, 1698, 2851, 2943. <sup>1</sup>H NMR (600 MHz, DMSO-*d*<sub>6</sub>) δ 3.76-3.82 (m, 1H, CH<sub>2</sub>), 4.07-4.11 (m, 1H, CH<sub>2</sub>), 4.67-4.42 (m, 1H, CH), 7.07-7.09 (m, 1H, CH), 7.34-7.37 (m, 2H, ArH), 7.45-7.49 (m, 2H, ArH), 7.58-7.61 (m, 2H, ArH), 7.74-7.77 (m, 2H, ArH), 10.72 (s, 1H, NH). <sup>13</sup>C NMR (151 MHz, DMSO-*d*<sub>6</sub>) δ 44.79, 49.39, 107.89, 119.13, 122.19, 122.99, 125.89, 128.82, 129.28, 129.42, 136.61, 139.82, 152.65, 158.06. Anal. Calcd for C<sub>18</sub>H<sub>14</sub>Cl<sub>2</sub>N<sub>4</sub>O<sub>2</sub>: C, 55.54; H, 3.63; Cl, 18.22; N, 14.39; O, 8.22. Found: C, 55.65; H, 3.52; Cl, 18.36; N, 14.55; O, 7.92. MS (EI) *m/z* calcd for 389.2 found 389.0 [M]<sup>+</sup>.

**1-(3-Chlorophenyl)-4-(1-(3-chlorophenyl)-2-oxoimidazolidin-4-yl)-1H-imidazol-2(3H)-one (5e)**

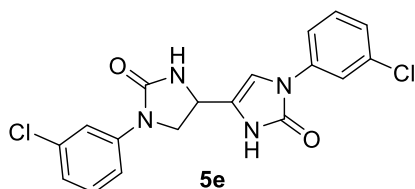

196 mg, 46% yield, white solid, mp 83-87 °C; IR 1664, 1688, 2872, 2998. <sup>1</sup>H NMR (500 MHz, DMSO-*d*<sub>6</sub>) δ 3.76-3.86 (m, 1H, CH<sub>2</sub>), 4.07-4.15 (m, 1H, CH<sub>2</sub>), 4.64-4.76 (m, 1H, CH), 7.05 (d, 1H, *J* = 7.8 Hz, ArH), 7.17 (s, 1H, CH), 7.26 (d, 1H, *J* = 7.7 Hz, ArH), 7.34 (t, 1H, *J* = 8.1 Hz, ArH), 7.41 (d, 1H, *J* = 8.0 Hz, ArH), 7.45 (t, 1H, *J* = 8.0 Hz, ArH), 7.56 (s, 1H, ArH), 7.68 (d, 1H, *J* = 8.3 Hz, ArH), 7.81 (s, 1H, ArH), 7.93 (s, 1H, NH), 10.75 (s, NH). <sup>13</sup>C NMR (151 MHz, DMSO-*d*<sub>6</sub>) δ 44.75, 49.30, 107.76, 115.79, 117.28, 118.68, 120.04, 121.76, 123.22, 125.01, 130.65, 131.21, 133.60, 133.95, 139.03, 142.30, 152.67, 157.95. Anal. Calcd for C<sub>18</sub>H<sub>14</sub>Cl<sub>2</sub>N<sub>4</sub>O<sub>2</sub>: C, 55.54; H, 3.63; Cl, 18.22; N, 14.39. Found: C, 55.71; H, 3.72; Cl, 18.13; N, 14.25. MS (EI) *m/z* calcd for 389.2 found 390.9 [M+H]<sup>+</sup>.

## Mechanistic studies

### Synthesis of 4,4'-bi(imidazole-2-one) **4**

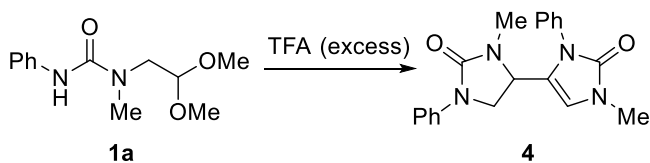

To a 50 mL flask a 1-(2,2-dimethoxyethyl)urea **1a** (3.99 g, 16.8 mmol, 1 equiv.) and dry chloroform (10 mL) was added. Then a TFA (6.42 mL, 83.9 mmol, 5 equiv.) was added dropwise and the reaction mixture was allowed to stir at room temperature for 10 h. The volatiles were removed under reduced pressure. The residue was washed with distilled water (3 x 10 mL) and triturated in water. The precipitate was filtered off and washed consecutively with distilled water (1 x 10 mL) and diethyl ether (1 x 10 mL) to give the compound **4** as a white solid (1.25 g, 75% yield).

Mp 161°C; IR 1598; 1560. <sup>1</sup>H NMR (400 MHz, CD<sub>3</sub>OD) δ 2.79 (s, 3H, CH<sub>3</sub>), 3.33 (s, 3H, CH<sub>3</sub>), 3.61-3.68 (m, 1H, CH<sub>2</sub>), 3.91-3.98 (m, 1H, CH<sub>2</sub>), 4.53-4.60 (m, 1H, CH), 6.77 (s, 1H, CH), 7.00 (tt, 1H, *J* = 6.6 Hz, *J* = 1.9 Hz, ArH), 7.22-7.31 (m, 6H, ArH), 7.31-7.35 (m, 1H, ArH), 7.36-7.42 (m, 2H, ArH). <sup>13</sup>C NMR (151 MHz, CD<sub>3</sub>OD) δ 27.91, 29.40, 47.93, 50.76, 113.03, 117.72, 120.66, 122.42, 128.09, 128.17, 128.75, 129.25, 134.47, 139.54, 153.89, 157.21.

<sup>1</sup>H NMR (500 MHz, CDCl<sub>3</sub>) δ 2.84 (s, 3H, CH<sub>3</sub>), 3.34 (s, 3H, CH<sub>3</sub>), 3.57-3.61 (m, 1H, CH<sub>2</sub>), 3.81-3.88 (m, 1H, CH<sub>2</sub>), 4.35-4.43 (m, 1H, CH), 6.35 (s, 1H, CH), 7.02 (t, 1H, *J* = 7.3, ArH), 7.25-7.31 (m, 4H, ArH), 7.33-7.39 (m, 3H, ArH), 7.44 (t, 1H, *J* = 7.8 Hz, ArH).

Anal. Calcd for C<sub>20</sub>H<sub>20</sub>N<sub>4</sub>O<sub>2</sub>: C, 68.95; H, 5.79; N, 16.08. Found: C, 68.83; H, 5.69; N, 16.17. MS (EI) *m/z* calcd for 348.4; found 349.11 [M+H]<sup>+</sup>, 371.06 [M+Na]<sup>+</sup>.

### Synthesis of octahydro-diimidazoquinolines (*exo,endo*)-**2a** from compound **3a**

This reaction was carried out as described on page S11, except the workup procedure, which was modified as follows. After the removal of solvent in vacuum, the residue was washed with diethyl ether (2 x 10 mL) and acetone (15 mL) to afford the mixture of octahydro-diimidazoquinolines *exo-2a* and *endo-2a* (328 mg, 90% yield) with *dr* 85:15 (according to <sup>1</sup>H NMR data). The <sup>1</sup>H and <sup>13</sup>C NMR spectra of the obtained mixture is consistent with those of compounds *exo-2a* and *endo-2a*.

### Synthesis of octahydro-diimidazoquinolines (*exo,endo*)-**2a** from compound **4**

This reaction was carried out in optimal conditions given in Table S1, entry 7:

To a 10 mL flask the compound **4** (0.5 g, 1.45 mmol, 1 equiv.), *o*-xylene (3.5 mL) and triflic acid (0.0012 g, 0.145 mmol, 0.1 equiv.) was added. The reaction mixture was refluxed for 10 h and cooled to room temperature. The volatiles were removed in vacuum. The resulting dark residue was washed with diethyl ether (2 x 10 mL) and acetone (15 mL) to afford the mixture of octahydro-diimidazoquinolines *exo-2a* and *endo-2a* (435 mg, 87% yield) with *dr* 90:10 (according to <sup>1</sup>H NMR data). The <sup>1</sup>H and <sup>13</sup>C NMR spectra of the obtained mixture is consistent with those of compounds *exo-2a* and *endo-2a*.

## Computational methods

Several works have shown that the B3LYP functional is relatively accurate for kinetic data. In 2004, the Truhlar's group has proposed MPWB1K functional,<sup>[5]</sup> which improve thermodynamic calculations. Later, it was used by Domingo with coworkers to investigate a mechanism of the Lewis and Bronsted acid-catalysed Povarov reaction of some simple imines.<sup>[6]</sup> Consequently, DFT computations were carried out using the

MPWB1K exchange-correlation functional, together with the standard 6-31G(d,p) basis set.<sup>[7]</sup> The optimisations were carried out using the Bery analytical gradient optimisation method.<sup>[8]</sup> The optimisations of the intermediates were followed by frequency computations in order to verify that they correspond to the true minima. The transition states were accepted if they had one and only one imaginary frequency. The IRC paths<sup>[9]</sup> were traced in order to check the energy profiles connecting each transition state to the two associated minima of the proposed mechanism using the HPC algorithm.<sup>[10]</sup> All computations were carried out with the Gaussian 16 suite of programs<sup>[11]</sup> in gaseous phase.

## Mechanism of the formation of octahydro-diimidazoquinolines 2

Our mechanistic proposal includes the intramolecular cyclization of the starting urea **1** to give imidazolin-2-ones **3** through the 2-oxoimidazolium cation **C1** as the first stage of the reaction. The possibility of such a cyclization, as well as the possibility of the subsequent re-protonation of the compound **3** resulting in the isomeric cation **C2** has been demonstrated in our prior work (Scheme S1).<sup>[2,12]</sup>

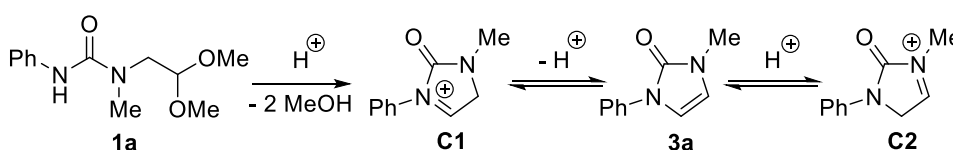

**Scheme S1.** Intramolecular cyclization of the urea **1a**

The subsequent stage involves the Povarov reaction of imidazolium cations **C1** and **C2** with imidazolin-2-one **3**. It is worth noting that the ability of the imidazole-2-ones **3** to serve as the dienophiles in the Povarov reaction was evidenced by Lavilla with coworkers.<sup>[13]</sup>

In principle, the Povarov reaction may proceed either via concerted [4+2] cycloaddition or the stepwise mechanism. However, most of the data to day suggest that the 2-step nucleophilic addition / intramolecular Friedel-Crafts substitution mechanism is more favourable in case of Lewis or Bronsted acid catalysis.<sup>[6,14–17]</sup> Taking this into account, a two-step mechanism was also proposed for the formation of the octahydro-diimidazoquinolines **2**, which was further supported by the quantum chemistry data.

The quantum chemistry calculations were performed using the Bronsted acid catalysed cyclization of the imidazolinone **3a** as the model reaction (Scheme S2).<sup>\*</sup> The interaction of the imidazolin-2-one **3a** with the cations **C1** and **C2** may result in four regioisomeric intermediates **I11-I14**, each of which exists as two diastereomers, giving rise to eight intermediates in total. However, only four of them (**RS-**, **SS-I12** and **RS-**, **SS-I13**) may undergo the intramolecular Friedel-Craft reaction to furnish isomeric octahydro-diimidazoquinolines **endo-2a**, **exo-2a**, **endo-2a'** and **exo-2a'**.

Gibbs free energies for all possible intermediates **C1**, **C2**, **I1-I14**, **I22**, **I23** and transition states **TS11-TS14** and **TS23**, **TS23** were calculated. The obtained results indicate that the intermediates **SS-** and **RS-I14**, as well as the intermediate **SS-I11** have the largest free Gibbs energy barriers for formation (20.81-23.52 kcal/mol). Additionally, the intermediates **SS-I14** and **SS-I11** have the highest free Gibbs energy (12.29 and 6.85 kcal/mol, accordingly). Thus, their formation is both thermodynamically and kinetically disfavored. Although the intermediate **RS-I14** has one of the lowest free energy (4.90 kcal/mol), the highest energy barrier (23.52 kcal/mol) also renders its formation less possible.

The free Gibbs energy of the intermediate **RS-I11** is comparable to that of intermediates **SS-** and **RS-I13** and **SS-I12** (5.16-5.81 kcal/mol). However, it has the lowest formation energy barrier (17.95 kcal/mol) and may be formed under kinetic control. The somewhat lower free energy of the cation **C2** compared to the cation

<sup>\*</sup> The formation of the imidazolinone **3a** from urea **1a** was described before<sup>[12]</sup> and was not modelled.

**C1** may also contribute to its formation. The isolation of the compound **4** from the reaction mixtures during optimization studies suggests that this is indeed the case.

As was mentioned before, only four intermediates, namely, **RS-** and **SS-I13** and **RS-**, **SS-I12**, may undergo the intramolecular aromatic electrophilic substitution to give isomeric octahydro-diimidazoquinolines **2a** and **2a'**. In all cases the free energy barrier for the intramolecular substitution is almost two-fold lower than the energy barrier for the formation of the intermediate itself (10.29-12.42 kcal/mol vs 18.90-19.62 kcal/mol). Thus, the regio- and diastereomeric composition of the final products is determined by the nucleophilic addition step, rather than intramolecular Friedel-Crafts substitution.

The free energy barriers for the formation of intermediates **SS-** and **RS-I13** are *ca* 0.5 kcal/mol higher than for the intermediates **SS-** and **RS-I12**, so the latter are kinetically favored. We should also note that the difference between free energies of the transition states **RS-TS12** and **SS-TS12** is too small (0.04 kcal/mol) and may be neglected. At the same time, the free energy of the intermediate **RS-I12** is the lowest of all (3.88 kcal/mol) and its formation is thermodynamically preferable.

Overall, the presented data suggests that the compound **endo-2a** is the most preferable product under thermodynamic control of the reaction, and the compound **exo-2a** is the next one. On the other hand, the formation of the compound **4** under kinetic control is also possible. These results are in good agreement with the experimental data. Moreover, the formation of both compounds **endo-2a** and **exo-2a** (*dr* 95 : 5) from the compound **4** was experimentally observed, which also supports strongly the theoretical calculations.

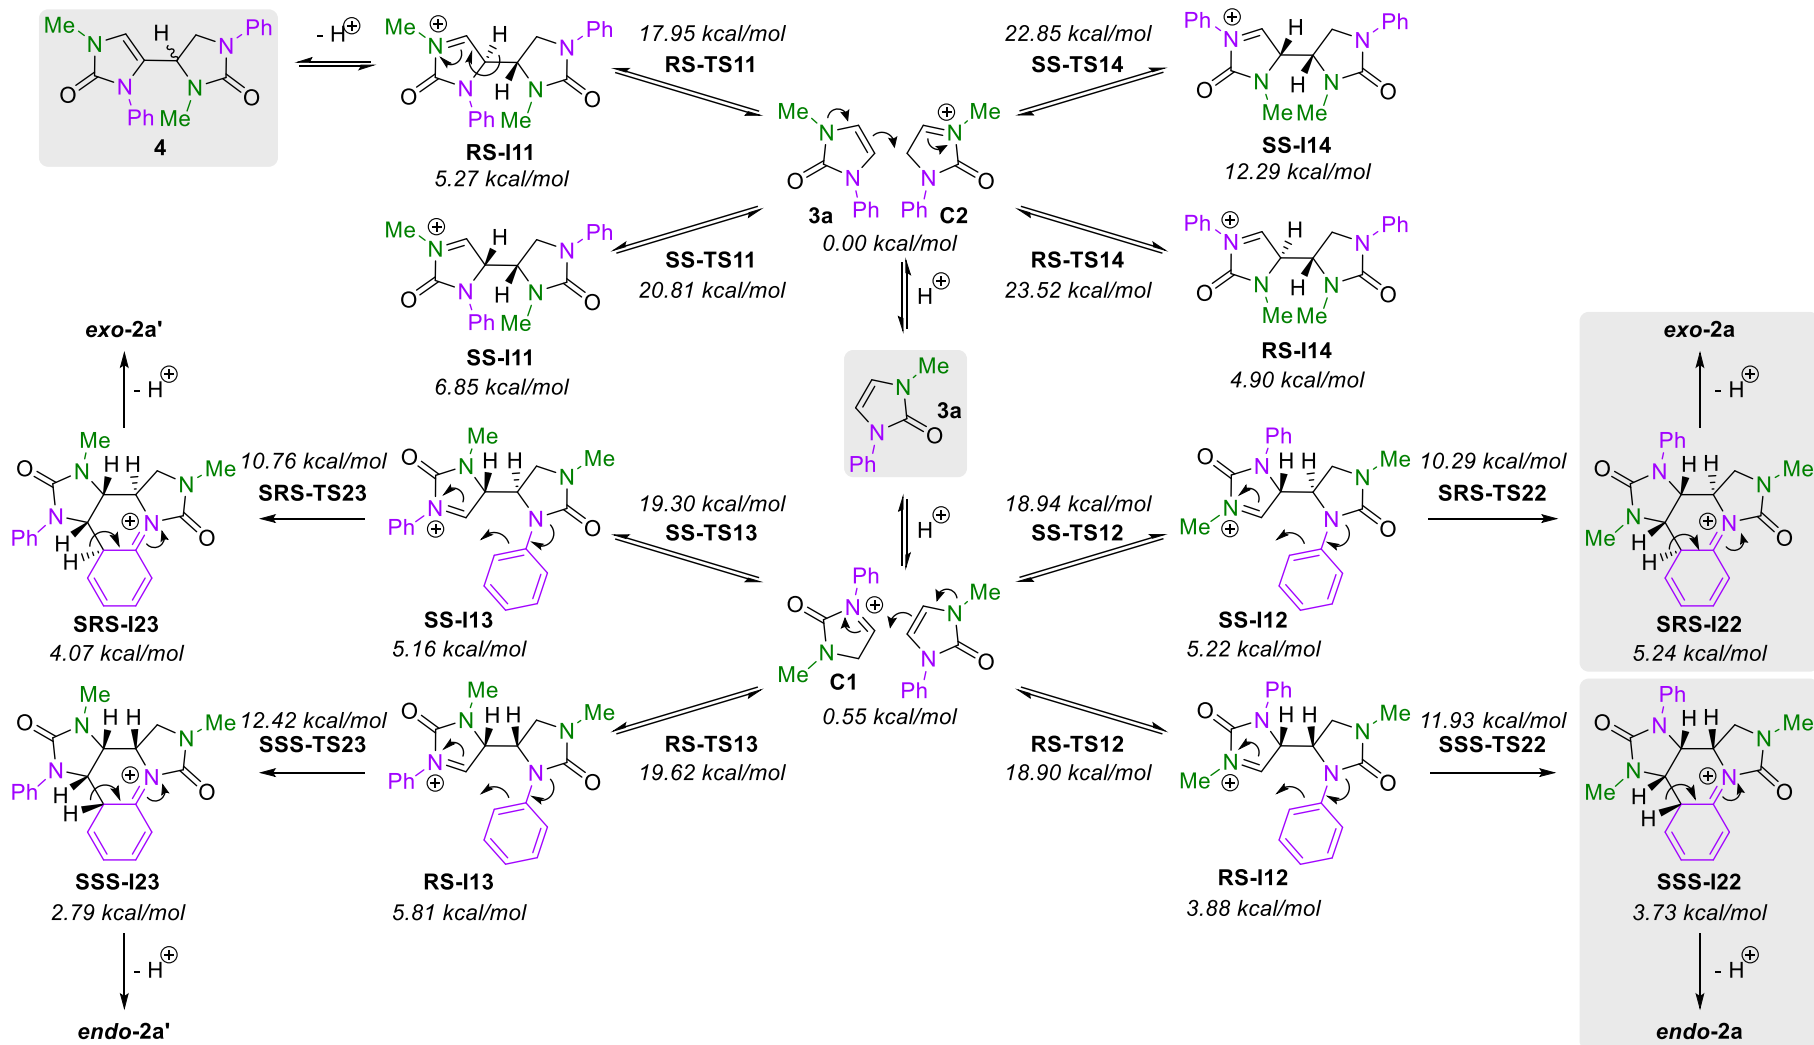

**Scheme S2.** Plausible mechanism for the formation of octahydro-diimidazoquinolines and relative free Gibbs energies (kcal/mol) as obtained from quantum chemistry calculations (MPWB1K/6-31G(d,p)).<sup>[a]</sup>

[a] The cyclization of the urea **1a** was taken as the model reaction

Additional quantum chemistry calculations were performed to explain the preferential formation of the *exo*-diastereomer in case of ureas with 3-substituted phenyl moiety using the urea **1g** as the model compound (Scheme S3). Just as in the case of compounds (*exo,endo*)-**2a**, the formation of the compounds (*exo,endo*)-**2g** is a two-step process with the nucleophilic addition step being a rate-determining one. In contrast to the unsubstituted phenyl ring, the 3-methylphenyl substituent makes the formation of the intermediate **SS-12** more preferable. Not only the free energy barrier is lower by 0.74 kcal/mol in this case, but also the intermediate **SS-12** itself is lower in energy by 1.09 kcal/mol. Thus, the formation of *exo*-isomer is favored by both thermodynamic and kinetic factors and the quantum chemistry data is in good agreement with the experimental results.

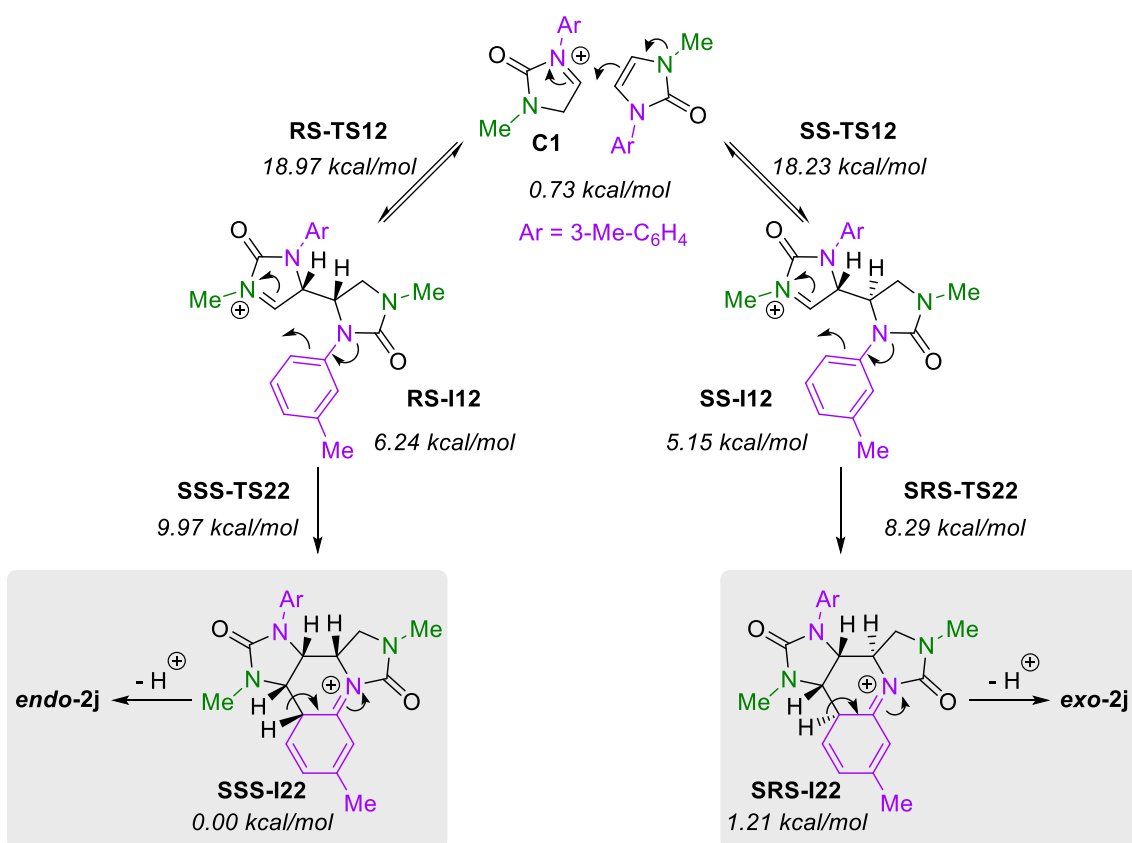

**Scheme S3.** Relative free Gibbs energies (kcal/mol) for the formation of compounds *exo*- and *endo*-**2g** as obtained from quantum chemistry calculations (MPWB1K/6-31G(d,p))

## References

- [1] A. R. Burilov, M. S. Khakimov, A. S. Gazizov, M. A. Pudovik, V. V Syakaev, D. B. Krivolapov, A. I. Kononov, *Mendeleev Commun.* **2008**, *18*, 54–55.
- [2] A. S. Gazizov, A. V Smolobochkin, E. A. Kuznetsova, D. S. Abdullaeva, A. R. Burilov, M. A. Pudovik, A. D. Voloshina, V. V Syakaev, A. P. Lyubina, S. K. Amerhanova, J. K. Voronina, *Molecules* **2021**, *26*, 4432.
- [3] C. C. Llopart, C. Ferrer, J. A. Joule, *Can. J. Chem.* **2004**, *82*, 1649–1661.
- [4] Y.-C. Hu, C.-F. Liang, J.-H. Tsai, G. P. A. Yap, Y.-T. Chang, T.-G. Ong, *Organometallics* **2010**, *29*, 3357–3361.
- [5] Y. Zhao, D. G. Truhlar, *J. Phys. Chem. A* **2004**, *108*, 6908–6918.
- [6] L. R. Domingo, M. J. Aurell, J. A. Sáez, S. M. Mekelleche, *RSC Adv.* **2014**, *4*, 25268.
- [7] W. J. Hehre, R. Ditchfield, J. A. Pople, *J. Chem. Phys.* **1972**, *56*, 2257–2261.
- [8] H. B. Schlegel, *J. Comput. Chem.* **1982**, *3*, 214–218.
- [9] K. Fukui, *Acc. Chem. Res.* **1981**, *14*, 363–368.
- [10] H. P. Hratchian, H. B. Schlegel, *J. Chem. Phys.* **2004**, *120*, 9918–9924.
- [11] M. J. Frisch, G. W. Trucks, H. B. Schlegel, G. E. Scuseria, M. A. Robb, J. R. Cheeseman, G. Scalmani, V. Barone, G.

A. Petersson, H. Nakatsuji, X. Li, M. Caricato, A. V. Marenich, J. Bloino, B. G. Janesko, R. Gomperts, B. Mennucci, H. P. Hratchian, J. V. Ortiz, A. F. Izmaylov, J. L. Sonnenberg, D. Williams-Young, F. Ding, F. Lipparini, F. Egidi, J. Goings, B. Peng, A. Petrone, T. Henderson, D. Ranasinghe, V. G. Zakrzewski, J. Gao, N. Rega, G. Zheng, W. Liang, M. Hada, M. Ehara, K. Toyota, R. Fukuda, J. Hasegawa, M. Ishida, T. Nakajima, Y. Honda, O. Kitao, H. Nakai, T. Vreven, K. Throssell, J. A. Montgomery, Jr., J. E. Peralta, F. Ogliaro, M. J. Bearpark, J. J. Heyd, E. N. Brothers, K. N. Kudin, V. N. Staroverov, T. A. Keith, R. Kobayashi, J. Normand, K. Raghavachari, A. P. Rendell, J. C. Burant, S. S. Iyengar, J. Tomasi, M. Cossi, J. M. Millam, M. Klene, C. Adamo, R. Cammi, J. W. Ochterski, R. L. Martin, K. Morokuma, O. Farkas, J. B. Foresman, and D. J. Fox. Gaussian 16, Revision A.03. Gaussian, Inc., Wallingford CT, 2016.

- [12] A. V. Smolobochkin, A. S. Gazizov, N. K. Otegen, J. K. Voronina, A. G. Strel'nik, A. I. Samigullina, A. R. Buri'lov, M. A. Pudovik, *Synthesis (Stuttg)*. **2020**, *52*, 3263–3271.
- [13] E. Vicente-García, R. Ramón, R. Lavilla, *Synthesis (Stuttg)*. **2011**, *2011*, 2237–2246.
- [14] S. Lamri, A. Heddami, M. Kara, W. Yahia, A. Khorief Nacereddine, *Organics* **2021**, *2*, 57–71.
- [15] S. Hermitage, D. A. Jay, A. Whiting, *Tetrahedron Lett.* **2002**, *43*, 9633–9636.
- [16] F. Linkert, S. Laschat, S. Kotila, T. Fox, *Tetrahedron* **1996**, *52*, 955–970.
- [17] L. R. Domingo, *Tetrahedron* **2002**, *58*, 3765–3774.
- [18] G. M. Sheldrick, **1997**.
- [19] O. V. Dolomanov, L. J. Bourhis, R. J. Gildea, J. A. K. Howard, H. Puschmann, *J. Appl. Crystallogr.* **2009**, *42*, 339–341.
- [20] L. Krause, R. Herbst-Irmer, G. M. Sheldrick, D. Stalke, *J. Appl. Crystallogr.* **2015**, *48*, 3–10.
- [21] G. M. Sheldrick, *Acta Crystallogr. Sect. A Found. Adv.* **2015**, *71*, s9–s9.
- [22] G. M. Sheldrick, *Acta Crystallogr. Sect. C Struct. Chem.* **2015**, *71*, 3–8.

## Coordinates of stationary points

### Reaction depicted on Scheme S2

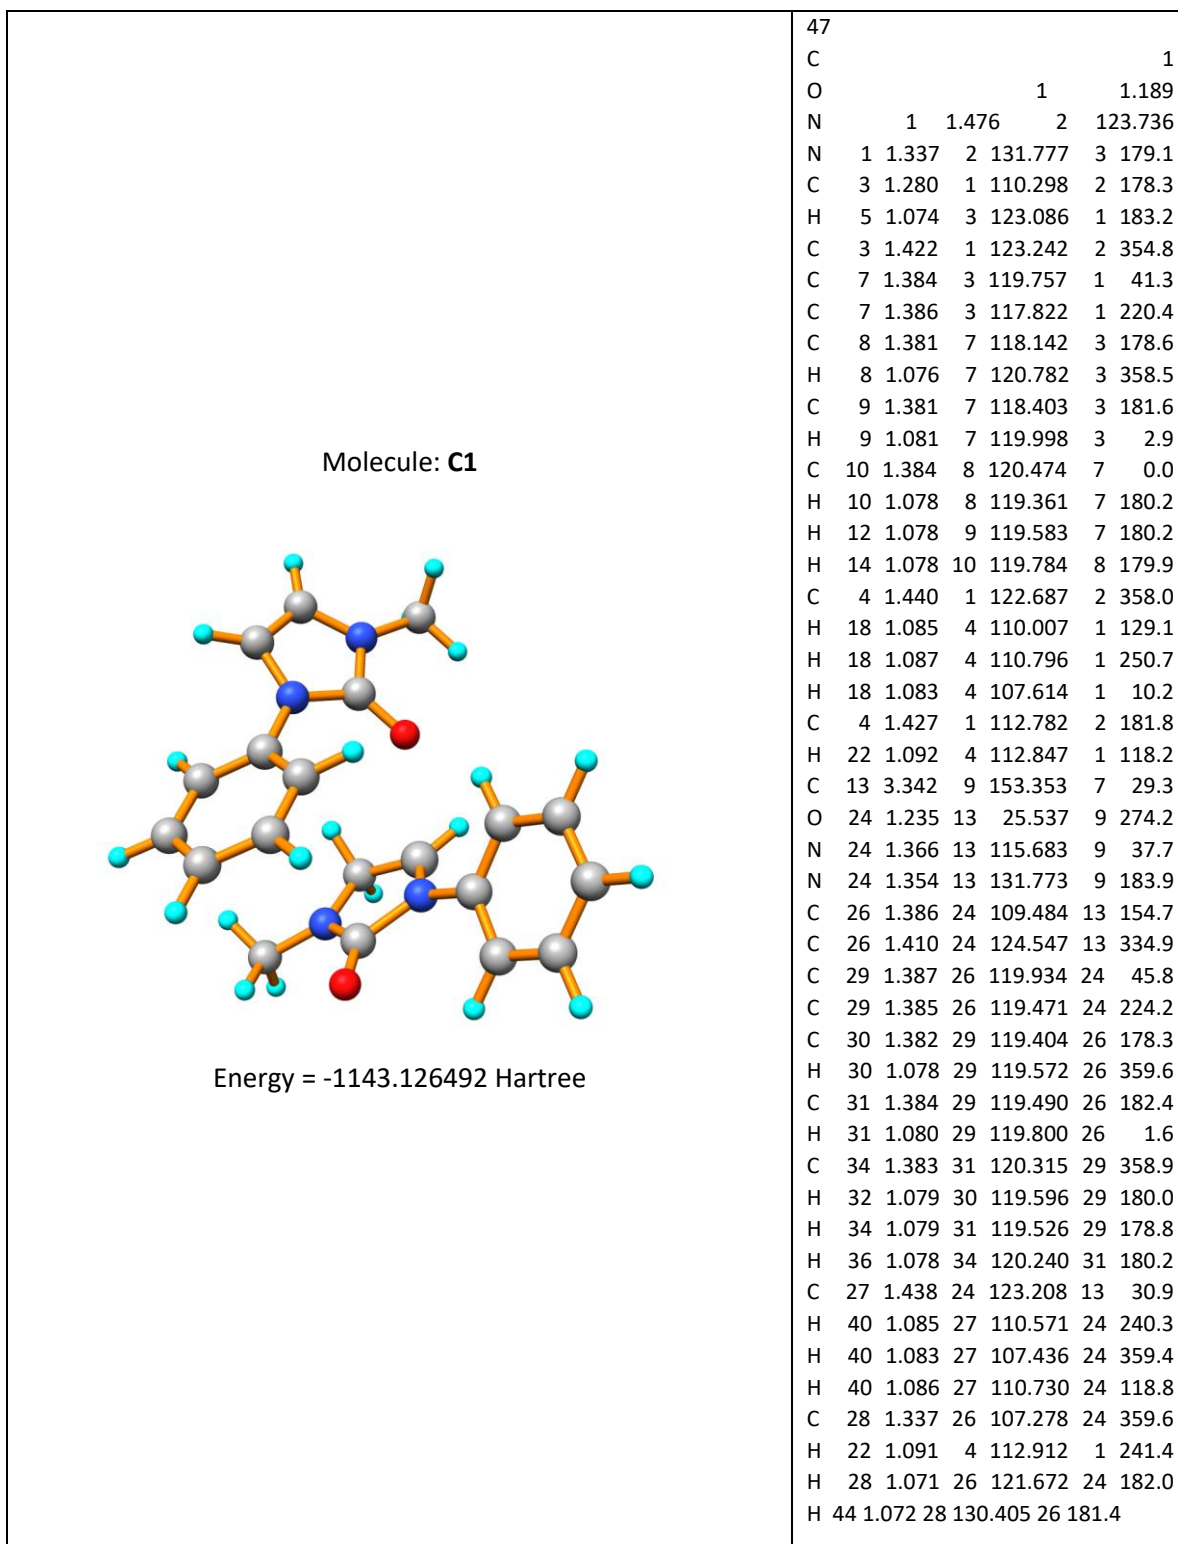



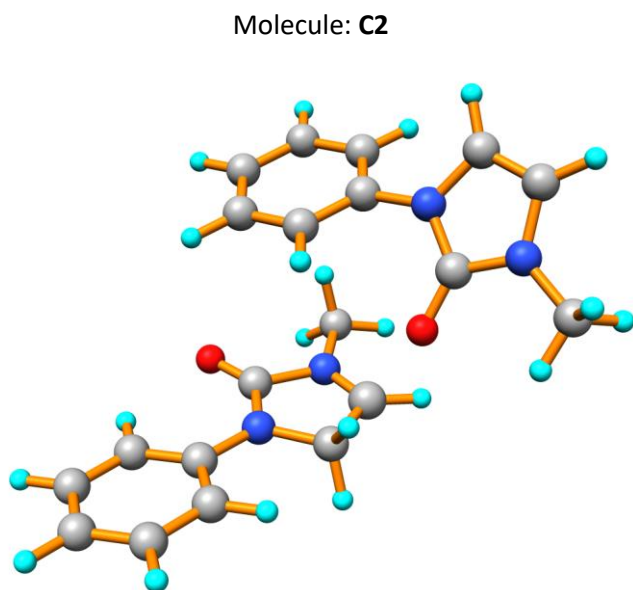

Energy = -1143.125616 Hartree

|    |    |       |    |         |
|----|----|-------|----|---------|
| 47 |    |       |    |         |
| C  |    |       |    | 1       |
| O  |    | 1     |    | 1.191   |
| N  | 1  | 1.345 | 2  | 133.619 |
| N  | 1  | 1.459 | 2  | 121.292 |
| N  | 3  | 1.437 | 1  | 111.401 |
| H  | 5  | 1.090 | 3  | 112.091 |
| C  | 3  | 1.417 | 1  | 126.175 |
| C  | 7  | 1.388 | 3  | 121.137 |
| C  | 7  | 1.387 | 3  | 118.453 |
| C  | 8  | 1.382 | 7  | 119.000 |
| H  | 8  | 1.075 | 7  | 120.693 |
| C  | 9  | 1.381 | 7  | 119.715 |
| H  | 9  | 1.078 | 7  | 121.216 |
| C  | 12 | 1.382 | 9  | 120.402 |
| H  | 10 | 1.078 | 8  | 118.861 |
| H  | 12 | 1.078 | 9  | 119.257 |
| H  | 14 | 1.078 | 12 | 120.272 |
| C  | 4  | 1.445 | 1  | 119.377 |
| H  | 18 | 1.082 | 4  | 109.169 |
| H  | 18 | 1.083 | 4  | 108.191 |
| H  | 18 | 1.086 | 4  | 108.538 |
| C  | 4  | 1.275 | 1  | 111.039 |
| H  | 22 | 1.074 | 4  | 123.986 |
| C  | 23 | 3.233 | 22 | 94.509  |
| O  | 24 | 1.237 | 23 | 34.400  |
| N  | 24 | 1.365 | 23 | 117.560 |
| N  | 24 | 1.353 | 23 | 121.951 |
| C  | 26 | 1.386 | 24 | 109.448 |
| C  | 26 | 1.409 | 24 | 124.923 |
| C  | 29 | 1.385 | 26 | 119.273 |
| C  | 29 | 1.387 | 26 | 120.169 |
| C  | 30 | 1.384 | 29 | 119.615 |
| H  | 30 | 1.079 | 29 | 119.821 |
| C  | 31 | 1.383 | 29 | 119.337 |
| H  | 31 | 1.078 | 29 | 119.491 |
| C  | 32 | 1.383 | 30 | 120.240 |
| H  | 32 | 1.078 | 30 | 119.538 |
| H  | 34 | 1.078 | 31 | 119.614 |
| H  | 36 | 1.078 | 32 | 120.201 |
| C  | 27 | 1.437 | 24 | 123.343 |
| H  | 40 | 1.083 | 27 | 107.478 |
| H  | 40 | 1.086 | 27 | 110.718 |
| H  | 40 | 1.085 | 27 | 110.570 |
| C  | 28 | 1.336 | 26 | 107.336 |
| H  | 5  | 1.089 | 3  | 113.327 |
| H  | 44 | 1.072 | 28 | 130.441 |
| H  | 28 | 1.071 | 26 | 121.684 |

Molecule: **RS-I11**

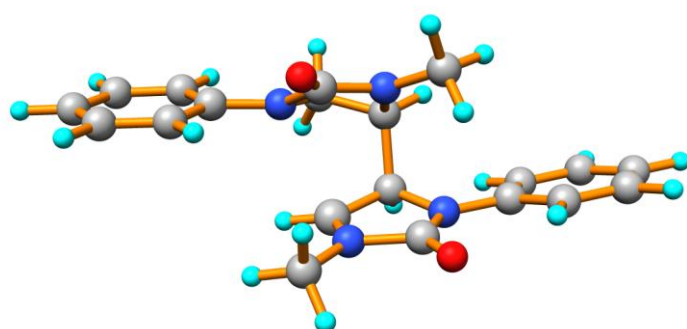

Energy = -1143.119082 Hartree

|    |    |       |    |         |
|----|----|-------|----|---------|
| 47 |    |       |    |         |
| C  |    |       |    | 1       |
| O  |    | 1     |    | 1.201   |
| N  | 1  | 1.396 | 2  | 127.774 |
| N  | 1  | 1.368 | 2  | 126.203 |
| C  | 3  | 1.445 | 1  | 108.884 |
| H  | 5  | 1.090 | 3  | 112.148 |
| C  | 3  | 1.410 | 1  | 124.746 |
| C  | 7  | 1.391 | 3  | 120.519 |
| C  | 7  | 1.388 | 3  | 119.373 |
| C  | 8  | 1.381 | 7  | 119.324 |
| H  | 8  | 1.076 | 7  | 120.125 |
| C  | 9  | 1.383 | 7  | 119.838 |
| H  | 9  | 1.078 | 7  | 120.920 |
| C  | 12 | 1.381 | 9  | 120.438 |
| H  | 10 | 1.078 | 8  | 119.075 |
| H  | 12 | 1.078 | 9  | 119.282 |
| H  | 14 | 1.078 | 12 | 120.264 |
| C  | 4  | 1.443 | 1  | 121.529 |
| H  | 18 | 1.084 | 4  | 109.133 |
| H  | 18 | 1.084 | 4  | 108.125 |
| H  | 18 | 1.088 | 4  | 112.847 |
| C  | 4  | 1.421 | 1  | 110.516 |
| H  | 22 | 1.085 | 4  | 112.594 |
| C  | 21 | 2.634 | 18 | 117.249 |
| O  | 24 | 1.191 | 21 | 81.793  |
| N  | 24 | 1.351 | 21 | 81.741  |
| N  | 24 | 1.452 | 21 | 111.834 |
| C  | 26 | 1.436 | 24 | 110.493 |
| C  | 26 | 1.420 | 24 | 125.837 |
| C  | 29 | 1.388 | 26 | 118.656 |
| C  | 29 | 1.388 | 26 | 121.113 |
| C  | 30 | 1.382 | 29 | 119.831 |
| H  | 30 | 1.079 | 29 | 121.335 |
| C  | 31 | 1.382 | 29 | 119.086 |
| H  | 31 | 1.075 | 29 | 120.720 |
| C  | 32 | 1.382 | 30 | 120.365 |
| H  | 32 | 1.078 | 30 | 119.286 |
| H  | 34 | 1.078 | 31 | 118.831 |
| H  | 36 | 1.078 | 32 | 120.264 |
| C  | 27 | 1.447 | 24 | 119.814 |
| H  | 40 | 1.083 | 27 | 108.822 |
| H  | 40 | 1.085 | 27 | 108.010 |
| H  | 40 | 1.082 | 27 | 108.995 |
| C  | 27 | 1.283 | 24 | 111.093 |
| H  | 5  | 1.088 | 3  | 111.294 |
| H  | 44 | 1.077 | 27 | 123.119 |
| H  | 28 | 1.086 | 26 | 113.366 |

Molecule: **RS-I12**

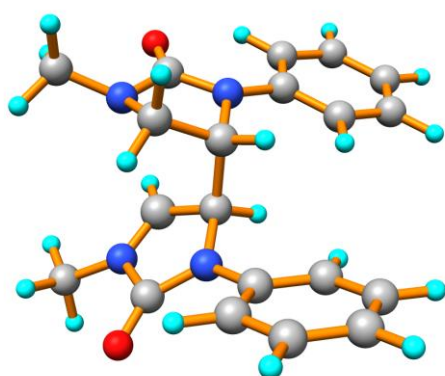

Energy = -1143.121360 Hartree

|    |    |       |    |         |          |
|----|----|-------|----|---------|----------|
| 47 |    |       |    |         |          |
| C  |    |       |    |         | 1        |
| O  |    |       | 1  |         | 1.201    |
| N  | 1  | 1.383 | 2  |         | 128.512  |
| N  | 1  | 1.388 | 2  | 124.733 | 3 184.5  |
| C  | 3  | 1.432 | 1  | 109.016 | 2 189.8  |
| H  | 5  | 1.084 | 3  | 113.636 | 1 211.7  |
| C  | 3  | 1.413 | 1  | 126.345 | 2 353.7  |
| C  | 7  | 1.391 | 3  | 121.573 | 1 6.1    |
| C  | 7  | 1.391 | 3  | 118.928 | 1 185.8  |
| C  | 8  | 1.381 | 7  | 119.382 | 3 180.3  |
| H  | 8  | 1.074 | 7  | 120.223 | 3 0.8    |
| C  | 9  | 1.383 | 7  | 120.214 | 3 179.6  |
| H  | 9  | 1.079 | 7  | 121.285 | 3 357.5  |
| C  | 12 | 1.380 | 9  | 120.479 | 7 0.2    |
| H  | 10 | 1.078 | 8  | 118.671 | 7 180.2  |
| H  | 12 | 1.078 | 9  | 119.203 | 7 179.5  |
| H  | 14 | 1.078 | 12 | 120.432 | 9 179.8  |
| C  | 4  | 1.442 | 1  | 118.555 | 2 339.2  |
| H  | 18 | 1.083 | 4  | 108.029 | 1 32.8   |
| H  | 18 | 1.085 | 4  | 109.997 | 1 152.6  |
| H  | 18 | 1.089 | 4  | 111.316 | 1 273.5  |
| C  | 4  | 1.436 | 1  | 109.003 | 2 194.7  |
| H  | 22 | 1.091 | 4  | 112.368 | 1 84.4   |
| C  | 5  | 3.447 | 3  | 132.449 | 1 64.0   |
| O  | 24 | 1.189 | 5  | 152.199 | 3 207.6  |
| N  | 24 | 1.348 | 5  | 37.138  | 3 121.6  |
| N  | 24 | 1.458 | 5  | 75.571  | 3 341.0  |
| C  | 26 | 1.435 | 24 | 112.058 | 5 323.0  |
| C  | 26 | 1.420 | 24 | 124.788 | 5 140.8  |
| C  | 29 | 1.386 | 26 | 118.835 | 24 145.3 |
| C  | 29 | 1.384 | 26 | 120.157 | 24 324.5 |
| C  | 30 | 1.382 | 29 | 119.347 | 26 178.5 |
| H  | 30 | 1.080 | 29 | 120.732 | 26 356.8 |
| C  | 31 | 1.382 | 29 | 118.935 | 26 180.6 |
| H  | 31 | 1.077 | 29 | 120.450 | 26 1.8   |
| C  | 32 | 1.383 | 30 | 120.198 | 29 0.8   |
| H  | 32 | 1.078 | 30 | 119.537 | 29 179.9 |
| H  | 34 | 1.078 | 31 | 119.245 | 29 180.5 |
| H  | 36 | 1.078 | 32 | 120.046 | 30 179.5 |
| C  | 27 | 1.447 | 24 | 119.531 | 5 200.4  |
| H  | 40 | 1.084 | 27 | 108.230 | 24 49.0  |
| H  | 40 | 1.082 | 27 | 109.320 | 24 170.0 |
| H  | 40 | 1.085 | 27 | 108.971 | 24 291.0 |
| C  | 27 | 1.282 | 24 | 111.057 | 5 21.2   |
| H  | 44 | 1.077 | 27 | 123.377 | 24 175.8 |
| H  | 22 | 1.088 | 4  | 112.114 | 1 207.0  |
| H  | 28 | 1.094 | 26 | 113.008 | 24 240.8 |

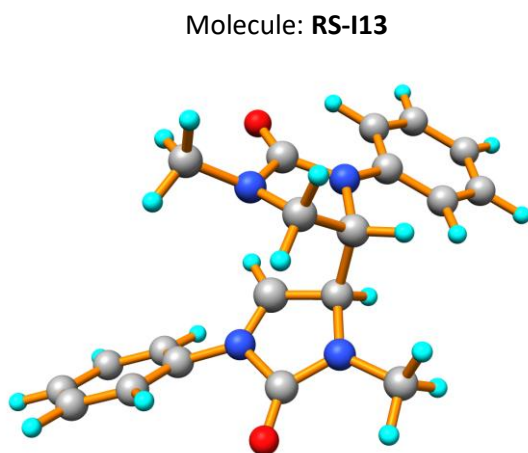

Energy = -1143.119464 Hartree

|    |    |       |    |         |          |
|----|----|-------|----|---------|----------|
| 47 |    |       |    |         |          |
| C  |    |       |    |         | 1        |
| O  |    |       | 1  |         | 1.201    |
| N  | 1  | 1.384 | 2  |         | 128.362  |
| N  | 1  | 1.385 | 2  | 124.940 | 3 184.7  |
| C  | 3  | 1.433 | 1  | 109.041 | 2 190.2  |
| H  | 5  | 1.084 | 3  | 112.619 | 1 212.3  |
| C  | 3  | 1.413 | 1  | 126.383 | 2 355.5  |
| C  | 7  | 1.391 | 3  | 121.411 | 1 10.1   |
| C  | 7  | 1.391 | 3  | 119.162 | 1 189.4  |
| C  | 8  | 1.381 | 7  | 119.409 | 3 179.9  |
| H  | 8  | 1.074 | 7  | 120.175 | 3 0.1    |
| C  | 9  | 1.383 | 7  | 120.291 | 3 180.1  |
| H  | 9  | 1.079 | 7  | 121.428 | 3 358.4  |
| C  | 12 | 1.380 | 9  | 120.448 | 7 0.1    |
| H  | 10 | 1.078 | 8  | 118.660 | 7 180.2  |
| H  | 12 | 1.078 | 9  | 119.190 | 7 179.7  |
| H  | 14 | 1.078 | 12 | 120.436 | 9 179.9  |
| C  | 4  | 1.441 | 1  | 119.197 | 2 340.8  |
| H  | 18 | 1.083 | 4  | 107.898 | 1 29.7   |
| H  | 18 | 1.086 | 4  | 109.973 | 1 149.2  |
| H  | 18 | 1.089 | 4  | 111.311 | 1 270.3  |
| C  | 4  | 1.435 | 1  | 109.308 | 2 194.1  |
| H  | 22 | 1.091 | 4  | 112.367 | 1 84.9   |
| C  | 5  | 3.470 | 3  | 131.782 | 1 64.2   |
| O  | 24 | 1.187 | 5  | 152.771 | 3 201.6  |
| N  | 24 | 1.471 | 5  | 75.299  | 3 340.5  |
| N  | 24 | 1.343 | 5  | 36.212  | 3 123.3  |
| C  | 26 | 1.287 | 24 | 110.145 | 5 21.1   |
| C  | 26 | 1.423 | 24 | 123.015 | 5 198.0  |
| C  | 29 | 1.384 | 26 | 119.436 | 24 43.7  |
| C  | 29 | 1.385 | 26 | 118.486 | 24 223.0 |
| C  | 30 | 1.381 | 29 | 118.277 | 26 178.4 |
| H  | 30 | 1.076 | 29 | 120.737 | 26 358.1 |
| C  | 31 | 1.380 | 29 | 118.801 | 26 181.7 |
| H  | 31 | 1.080 | 29 | 120.715 | 26 3.7   |
| C  | 32 | 1.384 | 30 | 120.480 | 29 0.1   |
| H  | 32 | 1.078 | 30 | 119.357 | 29 180.1 |
| H  | 34 | 1.078 | 31 | 119.645 | 29 180.4 |
| H  | 36 | 1.078 | 32 | 119.833 | 30 179.7 |
| C  | 27 | 1.442 | 24 | 122.126 | 5 147.7  |
| H  | 40 | 1.084 | 27 | 107.573 | 24 0.7   |
| H  | 40 | 1.086 | 27 | 110.391 | 24 119.7 |
| H  | 40 | 1.086 | 27 | 111.091 | 24 241.6 |
| C  | 27 | 1.428 | 24 | 112.981 | 5 323.2  |
| H  | 22 | 1.088 | 4  | 111.956 | 1 207.6  |
| H  | 44 | 1.095 | 27 | 112.471 | 24 242.6 |
| H  | 28 | 1.077 | 26 | 122.616 | 24 176.7 |

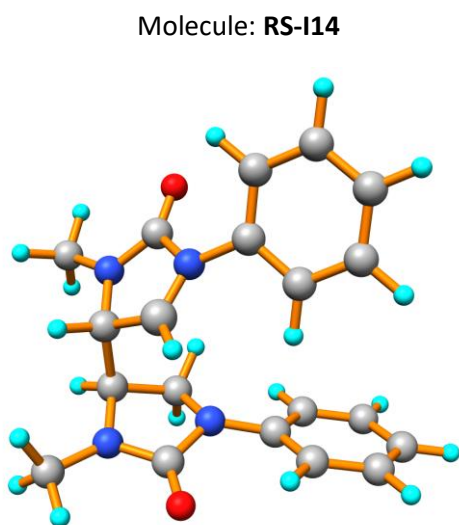

Energy = -1143.120578 Hartree

|    |    |       |    |         |          |
|----|----|-------|----|---------|----------|
| 47 |    |       |    |         |          |
| C  |    |       |    |         | 1        |
| O  |    |       | 1  |         | 1.200    |
| N  | 1  | 1.395 | 2  |         | 127.753  |
| N  | 1  | 1.371 | 2  | 125.818 | 3 183.5  |
| C  | 3  | 1.444 | 1  | 108.888 | 2 168.5  |
| H  | 5  | 1.090 | 3  | 111.907 | 1 271.7  |
| C  | 3  | 1.412 | 1  | 123.768 | 2 15.4   |
| C  | 7  | 1.392 | 3  | 120.804 | 1 327.5  |
| C  | 7  | 1.388 | 3  | 119.314 | 1 150.4  |
| C  | 8  | 1.381 | 7  | 119.361 | 3 182.4  |
| H  | 8  | 1.075 | 7  | 120.177 | 3 4.1    |
| C  | 9  | 1.383 | 7  | 119.986 | 3 177.4  |
| H  | 9  | 1.078 | 7  | 121.031 | 3 356.6  |
| C  | 12 | 1.381 | 9  | 120.505 | 7 0.0    |
| H  | 10 | 1.079 | 8  | 118.900 | 7 180.8  |
| H  | 12 | 1.078 | 9  | 119.214 | 7 179.7  |
| H  | 14 | 1.078 | 12 | 120.322 | 9 179.7  |
| C  | 4  | 1.436 | 1  | 122.054 | 2 2.3    |
| H  | 18 | 1.084 | 4  | 107.195 | 1 347.2  |
| H  | 18 | 1.090 | 4  | 112.311 | 1 106.2  |
| H  | 18 | 1.086 | 4  | 110.571 | 1 228.2  |
| C  | 4  | 1.420 | 1  | 110.801 | 2 168.5  |
| H  | 22 | 1.087 | 4  | 112.580 | 1 148.3  |
| C  | 22 | 3.453 | 4  | 134.620 | 1 296.4  |
| O  | 24 | 1.187 | 22 | 152.054 | 4 158.9  |
| N  | 24 | 1.472 | 22 | 75.377  | 4 21.0   |
| N  | 24 | 1.342 | 22 | 36.761  | 4 239.5  |
| C  | 26 | 1.286 | 24 | 110.156 | 22 337.2 |
| C  | 26 | 1.422 | 24 | 122.992 | 22 156.0 |
| C  | 29 | 1.384 | 26 | 119.520 | 24 42.1  |
| C  | 29 | 1.385 | 26 | 118.162 | 24 221.2 |
| C  | 30 | 1.381 | 29 | 118.131 | 26 178.4 |
| H  | 30 | 1.076 | 29 | 120.886 | 26 358.4 |
| C  | 31 | 1.380 | 29 | 118.605 | 26 181.6 |
| H  | 31 | 1.080 | 29 | 120.790 | 26 4.0   |
| C  | 34 | 1.384 | 31 | 120.059 | 29 359.7 |
| H  | 32 | 1.078 | 30 | 119.342 | 29 180.3 |
| H  | 34 | 1.078 | 31 | 119.402 | 29 180.7 |
| H  | 36 | 1.078 | 34 | 119.826 | 31 180.3 |
| C  | 27 | 1.443 | 24 | 122.131 | 22 214.8 |
| H  | 40 | 1.084 | 27 | 107.515 | 24 357.4 |
| H  | 40 | 1.086 | 27 | 111.201 | 24 116.4 |
| H  | 40 | 1.086 | 27 | 110.371 | 24 238.3 |
| C  | 27 | 1.429 | 24 | 112.986 | 22 37.4  |
| H  | 5  | 1.088 | 3  | 111.489 | 1 149.7  |
| H  | 44 | 1.093 | 27 | 111.894 | 24 119.0 |
| H  | 28 | 1.077 | 26 | 122.434 | 24 184.7 |

Molecule: **RS-TS11**

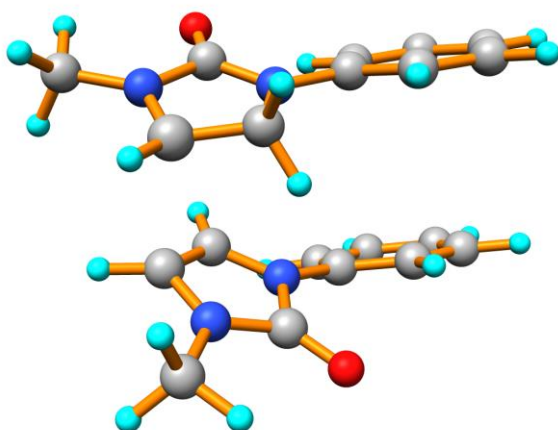

Energy = -1143.095350 Hartree

Imag. Freq. = -183.2399 cm<sup>-1</sup>

| 47 |    |       |    |         |
|----|----|-------|----|---------|
| C  |    |       |    | 1       |
| O  |    | 1     |    | 1.194   |
| N  | 1  | 1.356 | 2  | 131.464 |
| N  | 1  | 1.430 | 2  | 123.041 |
| C  | 3  | 1.433 | 1  | 111.305 |
| H  | 5  | 1.094 | 3  | 112.401 |
| C  | 3  | 1.415 | 1  | 125.777 |
| C  | 7  | 1.386 | 3  | 120.501 |
| C  | 7  | 1.385 | 3  | 118.802 |
| C  | 8  | 1.381 | 7  | 118.994 |
| H  | 8  | 1.076 | 7  | 120.435 |
| C  | 9  | 1.382 | 7  | 119.572 |
| H  | 9  | 1.079 | 7  | 121.008 |
| C  | 12 | 1.382 | 9  | 120.290 |
| H  | 10 | 1.078 | 8  | 119.045 |
| H  | 12 | 1.078 | 9  | 119.367 |
| H  | 14 | 1.078 | 12 | 120.172 |
| C  | 4  | 1.443 | 1  | 120.707 |
| H  | 18 | 1.087 | 4  | 110.630 |
| H  | 18 | 1.084 | 4  | 110.085 |
| H  | 18 | 1.083 | 4  | 107.128 |
| C  | 4  | 1.315 | 1  | 110.453 |
| H  | 22 | 1.077 | 4  | 121.208 |
| C  | 5  | 3.373 | 3  | 109.189 |
| O  | 24 | 1.198 | 5  | 121.748 |
| N  | 24 | 1.412 | 5  | 68.595  |
| N  | 24 | 1.372 | 5  | 72.329  |
| C  | 26 | 1.342 | 24 | 109.683 |
| C  | 26 | 1.419 | 24 | 124.672 |
| C  | 29 | 1.384 | 26 | 118.851 |
| C  | 29 | 1.384 | 26 | 119.789 |
| C  | 30 | 1.381 | 29 | 119.203 |
| H  | 30 | 1.079 | 29 | 120.497 |
| C  | 31 | 1.381 | 29 | 118.759 |
| H  | 31 | 1.077 | 29 | 120.317 |
| C  | 32 | 1.383 | 30 | 120.102 |
| H  | 32 | 1.078 | 30 | 119.569 |
| H  | 34 | 1.078 | 31 | 119.287 |
| H  | 36 | 1.078 | 32 | 119.956 |
| C  | 27 | 1.441 | 24 | 121.818 |
| H  | 40 | 1.084 | 27 | 107.001 |
| H  | 40 | 1.086 | 27 | 111.231 |
| H  | 40 | 1.086 | 27 | 110.737 |
| C  | 28 | 1.372 | 26 | 108.847 |
| H  | 5  | 1.089 | 3  | 112.288 |
| H  | 44 | 1.075 | 28 | 127.295 |
| H  | 28 | 1.074 | 26 | 121.831 |

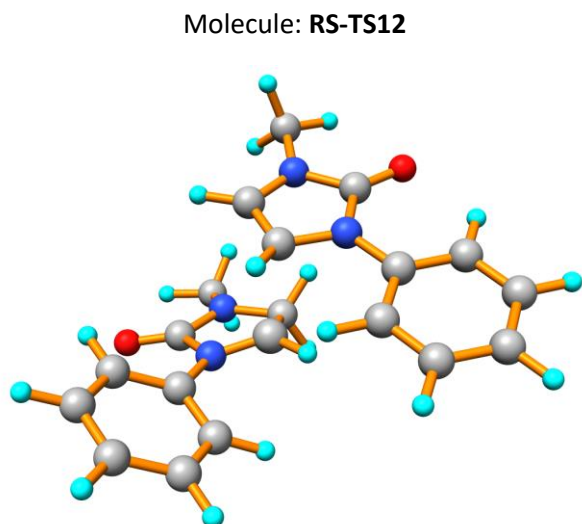

Energy = -1143.096963 Hartree

Imag. Freq. = -202.6069 cm<sup>-1</sup>

| 47 |    |       |    |         |
|----|----|-------|----|---------|
| C  |    |       |    | 1       |
| O  |    | 1     |    | 1.192   |
| N  | 1  | 1.442 | 2  | 124.997 |
| N  | 1  | 1.351 | 2  | 129.753 |
| C  | 3  | 1.314 | 1  | 109.908 |
| H  | 5  | 1.078 | 3  | 122.117 |
| C  | 3  | 1.419 | 1  | 124.588 |
| C  | 7  | 1.385 | 3  | 120.103 |
| C  | 7  | 1.387 | 3  | 118.521 |
| C  | 8  | 1.382 | 7  | 118.637 |
| H  | 8  | 1.076 | 7  | 120.528 |
| C  | 9  | 1.380 | 7  | 119.192 |
| H  | 9  | 1.080 | 7  | 120.629 |
| C  | 10 | 1.383 | 8  | 120.644 |
| H  | 10 | 1.078 | 8  | 119.236 |
| H  | 12 | 1.078 | 9  | 119.603 |
| H  | 14 | 1.078 | 10 | 119.991 |
| C  | 4  | 1.441 | 1  | 121.610 |
| H  | 18 | 1.083 | 4  | 107.700 |
| H  | 18 | 1.085 | 4  | 110.303 |
| H  | 18 | 1.087 | 4  | 111.056 |
| C  | 4  | 1.428 | 1  | 112.028 |
| H  | 22 | 1.095 | 4  | 112.401 |
| C  | 22 | 3.454 | 4  | 119.998 |
| O  | 24 | 1.202 | 22 | 120.664 |
| N  | 24 | 1.380 | 22 | 72.010  |
| N  | 24 | 1.400 | 22 | 70.034  |
| C  | 26 | 1.391 | 24 | 109.238 |
| C  | 26 | 1.417 | 24 | 126.153 |
| C  | 29 | 1.391 | 26 | 119.160 |
| C  | 29 | 1.388 | 26 | 120.949 |
| C  | 30 | 1.383 | 29 | 119.943 |
| H  | 30 | 1.079 | 29 | 121.681 |
| C  | 31 | 1.382 | 29 | 119.236 |
| H  | 31 | 1.074 | 29 | 120.243 |
| C  | 32 | 1.381 | 30 | 120.489 |
| H  | 32 | 1.078 | 30 | 119.190 |
| H  | 34 | 1.078 | 31 | 118.722 |
| H  | 36 | 1.078 | 32 | 120.361 |
| C  | 27 | 1.443 | 24 | 121.276 |
| H  | 40 | 1.085 | 27 | 110.566 |
| H  | 40 | 1.083 | 27 | 107.068 |
| H  | 40 | 1.085 | 27 | 110.306 |
| C  | 27 | 1.341 | 24 | 110.317 |
| H  | 44 | 1.074 | 27 | 122.717 |
| H  | 22 | 1.090 | 4  | 113.458 |
| H  | 28 | 1.073 | 26 | 122.366 |

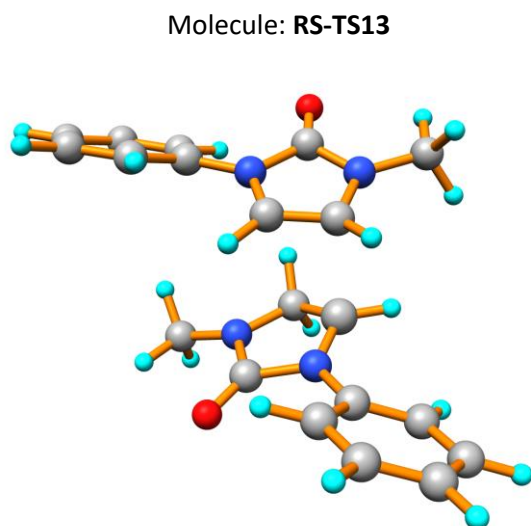

Energy = -1143.096130 Hartree

Imag. Freq. = -208.0142 cm<sup>-1</sup>

| 47 |    |       |    |         |
|----|----|-------|----|---------|
| C  |    |       |    | 1       |
| O  |    | 1     |    | 1.193   |
| N  | 1  | 1.437 | 2  | 124.996 |
| N  | 1  | 1.352 | 2  | 129.673 |
| C  | 3  | 1.322 | 1  | 109.789 |
| H  | 5  | 1.076 | 3  | 120.806 |
| C  | 3  | 1.419 | 1  | 124.448 |
| C  | 7  | 1.385 | 3  | 120.172 |
| C  | 7  | 1.386 | 3  | 118.495 |
| C  | 8  | 1.382 | 7  | 118.661 |
| H  | 8  | 1.076 | 7  | 120.418 |
| C  | 9  | 1.380 | 7  | 119.268 |
| H  | 9  | 1.080 | 7  | 120.457 |
| C  | 10 | 1.383 | 8  | 120.600 |
| H  | 10 | 1.078 | 8  | 119.301 |
| H  | 12 | 1.078 | 9  | 119.650 |
| H  | 14 | 1.078 | 10 | 119.978 |
| C  | 4  | 1.441 | 1  | 121.990 |
| H  | 18 | 1.085 | 4  | 110.098 |
| H  | 18 | 1.087 | 4  | 110.942 |
| H  | 18 | 1.083 | 4  | 107.561 |
| C  | 4  | 1.428 | 1  | 112.002 |
| H  | 22 | 1.095 | 4  | 112.336 |
| C  | 22 | 3.432 | 4  | 113.357 |
| O  | 24 | 1.199 | 22 | 123.069 |
| N  | 24 | 1.413 | 22 | 66.090  |
| N  | 24 | 1.369 | 22 | 73.426  |
| C  | 26 | 1.344 | 24 | 109.666 |
| C  | 26 | 1.418 | 24 | 124.473 |
| C  | 29 | 1.385 | 26 | 119.659 |
| C  | 29 | 1.384 | 26 | 119.192 |
| C  | 30 | 1.382 | 29 | 118.863 |
| H  | 30 | 1.077 | 29 | 120.287 |
| C  | 31 | 1.382 | 29 | 119.279 |
| H  | 31 | 1.079 | 29 | 120.517 |
| C  | 34 | 1.383 | 31 | 120.218 |
| H  | 32 | 1.078 | 30 | 119.297 |
| H  | 34 | 1.078 | 31 | 119.498 |
| H  | 36 | 1.078 | 34 | 120.003 |
| C  | 27 | 1.440 | 24 | 121.931 |
| H  | 40 | 1.085 | 27 | 110.727 |
| H  | 40 | 1.087 | 27 | 111.228 |
| H  | 40 | 1.084 | 27 | 107.039 |
| C  | 28 | 1.371 | 26 | 108.679 |
| H  | 22 | 1.089 | 4  | 113.111 |
| H  | 44 | 1.075 | 28 | 127.275 |
| H  | 28 | 1.073 | 26 | 122.157 |



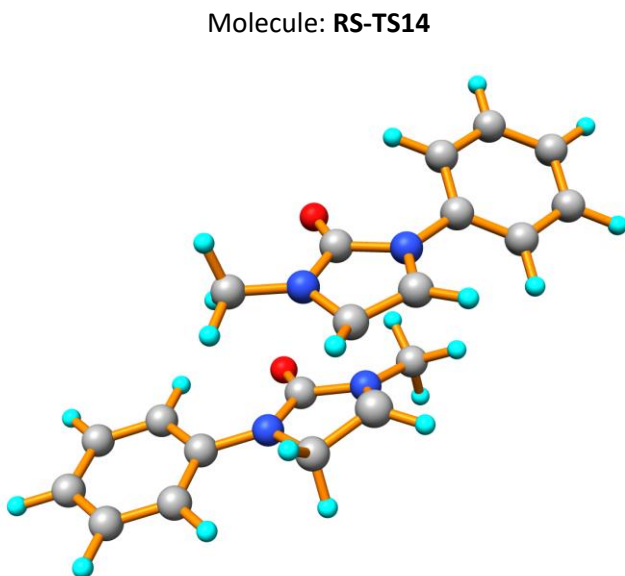

Energy = -1143.092932 Hartree

Imag. Freq. = -317.3563  $\text{cm}^{-1}$

|    |    |       |    |         |          |
|----|----|-------|----|---------|----------|
| 47 |    |       |    |         |          |
| C  |    |       |    |         | 1        |
| O  |    |       | 1  |         | 1.195    |
| N  | 1  | 1.359 | 2  |         | 131.134  |
| N  | 1  | 1.418 | 2  | 122.790 | 3 180.6  |
| C  | 3  | 1.436 | 1  | 110.988 | 2 177.4  |
| H  | 5  | 1.094 | 3  | 111.696 | 1 257.1  |
| C  | 3  | 1.411 | 1  | 126.506 | 2 1.0    |
| C  | 7  | 1.390 | 3  | 121.220 | 1 346.1  |
| C  | 7  | 1.388 | 3  | 118.679 | 1 167.3  |
| C  | 8  | 1.381 | 7  | 119.150 | 3 181.3  |
| H  | 8  | 1.075 | 7  | 120.452 | 3 2.5    |
| C  | 9  | 1.382 | 7  | 119.873 | 3 178.5  |
| H  | 9  | 1.078 | 7  | 121.130 | 3 357.3  |
| C  | 12 | 1.381 | 9  | 120.440 | 7 0.1    |
| H  | 10 | 1.078 | 8  | 118.827 | 7 180.3  |
| H  | 12 | 1.078 | 9  | 119.237 | 7 179.7  |
| H  | 14 | 1.078 | 12 | 120.316 | 9 179.8  |
| C  | 4  | 1.446 | 1  | 119.314 | 2 347.4  |
| H  | 18 | 1.085 | 4  | 109.195 | 1 47.8   |
| H  | 18 | 1.083 | 4  | 109.396 | 1 168.2  |
| H  | 18 | 1.086 | 4  | 109.778 | 1 288.4  |
| C  | 4  | 1.333 | 1  | 111.139 | 2 169.6  |
| H  | 22 | 1.077 | 4  | 119.803 | 1 157.7  |
| C  | 19 | 2.929 | 18 | 100.877 | 4 43.9   |
| O  | 24 | 1.195 | 19 | 82.347  | 18 191.2 |
| N  | 24 | 1.432 | 19 | 77.794  | 18 60.8  |
| N  | 24 | 1.361 | 19 | 111.132 | 18 319.8 |
| C  | 26 | 1.325 | 24 | 109.190 | 19 252.0 |
| C  | 26 | 1.420 | 24 | 124.385 | 19 71.1  |
| C  | 29 | 1.385 | 26 | 119.950 | 24 29.3  |
| C  | 29 | 1.387 | 26 | 119.026 | 24 207.9 |
| C  | 30 | 1.382 | 29 | 118.709 | 26 178.6 |
| H  | 30 | 1.075 | 29 | 120.505 | 26 358.2 |
| C  | 31 | 1.380 | 29 | 119.504 | 26 181.9 |
| H  | 31 | 1.080 | 29 | 120.927 | 26 2.3   |
| C  | 32 | 1.383 | 30 | 120.823 | 29 359.6 |
| H  | 32 | 1.078 | 30 | 119.069 | 29 180.0 |
| H  | 34 | 1.078 | 31 | 119.591 | 29 180.0 |
| H  | 36 | 1.078 | 32 | 120.108 | 30 180.1 |
| C  | 27 | 1.446 | 24 | 120.800 | 19 255.5 |
| H  | 40 | 1.085 | 27 | 109.943 | 24 289.8 |
| H  | 40 | 1.086 | 27 | 109.580 | 24 49.8  |
| H  | 40 | 1.083 | 27 | 109.331 | 24 169.4 |
| C  | 27 | 1.381 | 24 | 110.503 | 19 75.5  |
| H  | 5  | 1.086 | 3  | 111.892 | 1 136.0  |
| H  | 44 | 1.076 | 27 | 120.947 | 24 158.4 |
| H  | 28 | 1.075 | 26 | 122.652 | 24 183.5 |

Molecule: **SRS-I22**

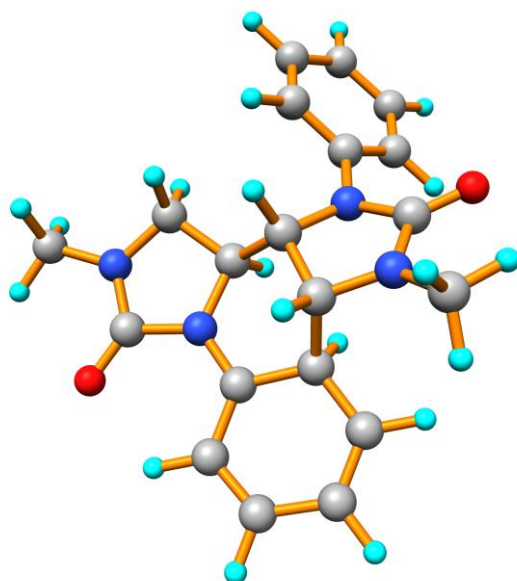

Energy = -1143.122346 Hartree

|    |    |       |    |         |
|----|----|-------|----|---------|
| 47 |    |       |    |         |
| C  |    |       |    | 1       |
| O  |    |       | 1  | 1.197   |
| N  | 1  | 1.387 | 2  | 127.283 |
| N  | 1  | 1.375 | 2  | 126.463 |
| C  | 4  | 1.412 | 1  | 111.516 |
| C  | 3  | 1.437 | 1  | 110.676 |
| H  | 6  | 1.093 | 3  | 112.342 |
| H  | 5  | 1.086 | 4  | 112.419 |
| C  | 3  | 1.411 | 1  | 121.966 |
| C  | 9  | 1.386 | 3  | 119.191 |
| C  | 9  | 1.386 | 3  | 120.612 |
| C  | 10 | 1.380 | 9  | 119.506 |
| H  | 10 | 1.077 | 9  | 119.534 |
| C  | 11 | 1.384 | 9  | 119.832 |
| H  | 11 | 1.080 | 9  | 120.392 |
| C  | 14 | 1.382 | 11 | 120.163 |
| H  | 12 | 1.078 | 10 | 119.382 |
| H  | 14 | 1.079 | 11 | 119.611 |
| H  | 16 | 1.078 | 14 | 120.119 |
| C  | 4  | 1.436 | 1  | 122.189 |
| H  | 20 | 1.087 | 4  | 111.964 |
| H  | 20 | 1.084 | 4  | 106.915 |
| H  | 20 | 1.088 | 4  | 111.180 |
| C  | 6  | 3.620 | 3  | 139.525 |
| O  | 24 | 1.198 | 6  | 148.332 |
| N  | 24 | 1.435 | 6  | 29.330  |
| N  | 24 | 1.335 | 6  | 79.737  |
| C  | 27 | 1.435 | 24 | 114.377 |
| C  | 26 | 1.453 | 24 | 111.431 |
| H  | 29 | 1.091 | 26 | 108.562 |
| H  | 28 | 1.085 | 27 | 111.578 |
| C  | 26 | 1.323 | 24 | 126.692 |
| C  | 32 | 1.405 | 26 | 124.914 |
| C  | 32 | 1.474 | 26 | 113.854 |
| C  | 33 | 1.362 | 32 | 118.126 |
| H  | 33 | 1.074 | 32 | 120.014 |
| C  | 34 | 1.467 | 32 | 115.873 |
| C  | 37 | 1.340 | 34 | 121.594 |
| H  | 35 | 1.080 | 33 | 117.992 |
| H  | 37 | 1.078 | 34 | 116.816 |
| H  | 38 | 1.077 | 37 | 121.241 |
| C  | 27 | 1.438 | 24 | 121.906 |
| H  | 42 | 1.086 | 27 | 110.164 |
| H  | 42 | 1.083 | 27 | 107.954 |
| H  | 42 | 1.088 | 27 | 110.706 |
| H  | 28 | 1.091 | 27 | 110.491 |
| H  | 34 | 1.099 | 32 | 109.310 |

Molecule: **SRS-I23**

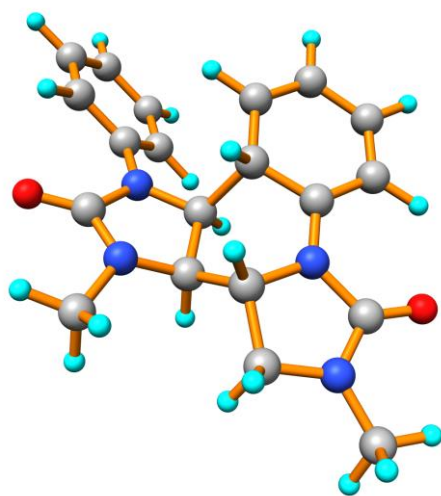

Energy = -1143.125199 Hartree

|    |    |       |    |         |
|----|----|-------|----|---------|
| 47 |    |       |    |         |
| C  |    |       |    | 1       |
| O  |    |       | 1  | 1.198   |
| N  | 1  | 1.386 | 2  | 127.306 |
| N  | 1  | 1.376 | 2  | 125.885 |
| C  | 4  | 1.426 | 1  | 111.436 |
| C  | 3  | 1.419 | 1  | 111.347 |
| H  | 6  | 1.084 | 3  | 112.592 |
| H  | 5  | 1.094 | 4  | 112.038 |
| C  | 3  | 1.411 | 1  | 124.691 |
| C  | 9  | 1.389 | 3  | 120.447 |
| C  | 9  | 1.389 | 3  | 119.552 |
| C  | 10 | 1.381 | 9  | 119.358 |
| H  | 10 | 1.076 | 9  | 119.932 |
| C  | 11 | 1.382 | 9  | 119.954 |
| H  | 11 | 1.079 | 9  | 120.850 |
| C  | 14 | 1.382 | 11 | 120.339 |
| H  | 12 | 1.078 | 10 | 119.055 |
| H  | 14 | 1.078 | 11 | 119.389 |
| H  | 16 | 1.078 | 14 | 120.265 |
| C  | 4  | 1.437 | 1  | 119.906 |
| H  | 20 | 1.088 | 4  | 110.998 |
| H  | 20 | 1.084 | 4  | 107.504 |
| H  | 20 | 1.091 | 4  | 111.526 |
| C  | 5  | 3.529 | 4  | 143.944 |
| O  | 24 | 1.198 | 5  | 146.730 |
| N  | 24 | 1.431 | 5  | 32.482  |
| N  | 24 | 1.337 | 5  | 79.099  |
| C  | 27 | 1.435 | 24 | 115.055 |
| C  | 26 | 1.445 | 24 | 111.937 |
| H  | 29 | 1.090 | 26 | 108.995 |
| H  | 28 | 1.090 | 27 | 110.889 |
| C  | 26 | 1.326 | 24 | 127.390 |
| C  | 32 | 1.400 | 26 | 124.804 |
| C  | 32 | 1.480 | 26 | 113.814 |
| C  | 33 | 1.366 | 32 | 118.105 |
| H  | 33 | 1.074 | 32 | 120.025 |
| C  | 34 | 1.469 | 32 | 115.717 |
| C  | 37 | 1.342 | 34 | 121.393 |
| H  | 35 | 1.080 | 33 | 117.913 |
| H  | 37 | 1.078 | 34 | 117.158 |
| H  | 38 | 1.077 | 37 | 120.956 |
| C  | 27 | 1.438 | 24 | 122.016 |
| H  | 42 | 1.087 | 27 | 110.541 |
| H  | 42 | 1.083 | 27 | 107.890 |
| H  | 42 | 1.087 | 27 | 110.431 |
| H  | 28 | 1.088 | 27 | 110.907 |
| H  | 34 | 1.097 | 32 | 109.611 |

Molecule: SRS-TS22

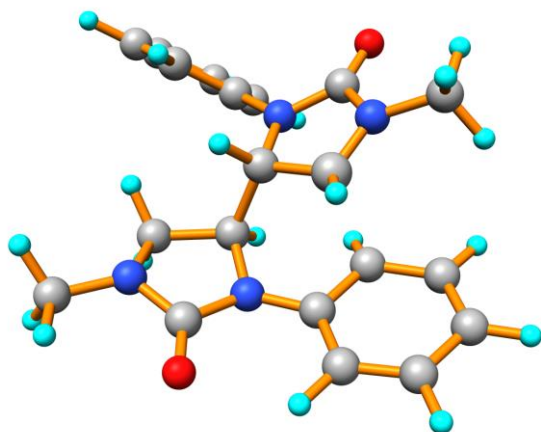

Energy = -1143.112934 Hartree

Imag. Freq. = -267.5081 cm<sup>-1</sup>

| 47 |    |       |    |         |
|----|----|-------|----|---------|
| C  |    |       |    | 1       |
| O  |    | 1     |    | 1.192   |
| N  | 1  | 1.362 | 2  | 130.000 |
| N  | 1  | 1.417 | 2  | 124.592 |
| C  | 4  | 1.329 | 1  | 111.466 |
| C  | 3  | 1.435 | 1  | 112.334 |
| H  | 6  | 1.096 | 3  | 112.336 |
| H  | 5  | 1.078 | 4  | 119.097 |
| C  | 3  | 1.420 | 1  | 122.592 |
| C  | 9  | 1.383 | 3  | 119.473 |
| C  | 9  | 1.386 | 3  | 119.677 |
| C  | 10 | 1.383 | 9  | 119.297 |
| H  | 10 | 1.078 | 9  | 119.748 |
| C  | 11 | 1.382 | 9  | 119.455 |
| H  | 11 | 1.080 | 9  | 120.163 |
| C  | 12 | 1.383 | 10 | 120.239 |
| H  | 12 | 1.078 | 10 | 119.614 |
| H  | 14 | 1.078 | 11 | 119.772 |
| H  | 16 | 1.078 | 12 | 119.963 |
| C  | 4  | 1.440 | 1  | 121.283 |
| H  | 20 | 1.086 | 4  | 110.392 |
| H  | 20 | 1.083 | 4  | 107.070 |
| H  | 20 | 1.085 | 4  | 110.310 |
| C  | 7  | 3.258 | 6  | 81.469  |
| O  | 24 | 1.199 | 7  | 136.464 |
| N  | 24 | 1.416 | 7  | 61.532  |
| N  | 24 | 1.349 | 7  | 65.770  |
| C  | 27 | 1.435 | 24 | 112.449 |
| C  | 26 | 1.434 | 24 | 110.815 |
| H  | 29 | 1.086 | 26 | 112.050 |
| H  | 28 | 1.091 | 27 | 111.529 |
| C  | 26 | 1.361 | 24 | 126.271 |
| C  | 32 | 1.398 | 26 | 123.763 |
| C  | 32 | 1.420 | 26 | 116.184 |
| C  | 33 | 1.372 | 32 | 118.909 |
| H  | 33 | 1.074 | 32 | 119.707 |
| C  | 34 | 1.415 | 32 | 119.168 |
| C  | 37 | 1.362 | 34 | 120.513 |
| H  | 35 | 1.079 | 33 | 118.396 |
| H  | 37 | 1.079 | 34 | 118.659 |
| H  | 38 | 1.077 | 37 | 120.857 |
| C  | 27 | 1.438 | 24 | 121.185 |
| H  | 42 | 1.089 | 27 | 111.084 |
| H  | 42 | 1.083 | 27 | 107.849 |
| H  | 42 | 1.086 | 27 | 110.266 |
| H  | 28 | 1.086 | 27 | 111.902 |
| H  | 34 | 1.081 | 32 | 119.222 |

Molecule: SRS-TS23

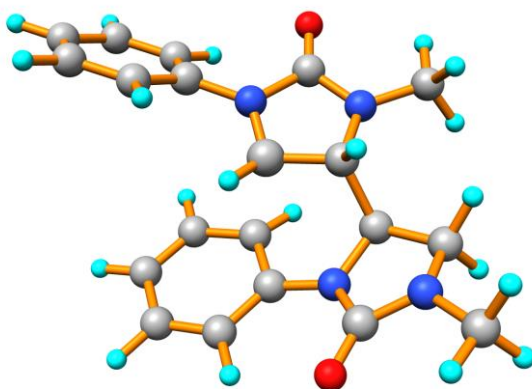

Energy = -1143.113437 Hartree

Imag. Freq. = -241.2620 cm<sup>-1</sup>

| 47 |    |       |    |         |
|----|----|-------|----|---------|
| C  |    |       |    | 1       |
| O  |    |       | 1  | 1.192   |
| N  | 1  | 1.429 | 2  | 125.490 |
| N  | 1  | 1.354 | 2  | 129.052 |
| C  | 4  | 1.429 | 1  | 112.822 |
| C  | 3  | 1.328 | 1  | 110.759 |
| H  | 6  | 1.076 | 3  | 119.781 |
| H  | 5  | 1.097 | 4  | 112.127 |
| C  | 3  | 1.418 | 1  | 123.751 |
| C  | 9  | 1.385 | 3  | 119.725 |
| C  | 9  | 1.385 | 3  | 118.988 |
| C  | 10 | 1.382 | 9  | 118.745 |
| H  | 10 | 1.076 | 9  | 120.338 |
| C  | 11 | 1.380 | 9  | 119.258 |
| H  | 11 | 1.079 | 9  | 120.633 |
| C  | 12 | 1.383 | 10 | 120.547 |
| H  | 12 | 1.078 | 10 | 119.309 |
| H  | 14 | 1.078 | 11 | 119.609 |
| H  | 16 | 1.078 | 12 | 119.990 |
| C  | 4  | 1.439 | 1  | 121.520 |
| H  | 20 | 1.088 | 4  | 111.028 |
| H  | 20 | 1.087 | 4  | 111.073 |
| H  | 20 | 1.084 | 4  | 107.408 |
| C  | 8  | 3.226 | 5  | 82.341  |
| O  | 24 | 1.199 | 8  | 136.360 |
| N  | 24 | 1.412 | 8  | 62.639  |
| N  | 24 | 1.353 | 8  | 64.925  |
| C  | 27 | 1.433 | 24 | 112.077 |
| C  | 26 | 1.431 | 24 | 110.558 |
| H  | 29 | 1.087 | 26 | 111.898 |
| H  | 28 | 1.088 | 27 | 111.536 |
| C  | 26 | 1.368 | 24 | 126.178 |
| C  | 32 | 1.396 | 26 | 123.596 |
| C  | 32 | 1.417 | 26 | 116.452 |
| C  | 33 | 1.375 | 32 | 118.916 |
| H  | 33 | 1.074 | 32 | 119.785 |
| C  | 34 | 1.410 | 32 | 119.603 |
| C  | 37 | 1.365 | 34 | 120.305 |
| H  | 35 | 1.079 | 33 | 118.369 |
| H  | 37 | 1.078 | 34 | 118.864 |
| H  | 38 | 1.077 | 37 | 120.691 |
| C  | 27 | 1.438 | 24 | 121.022 |
| H  | 42 | 1.086 | 27 | 110.255 |
| H  | 42 | 1.083 | 27 | 107.782 |
| H  | 42 | 1.089 | 27 | 111.184 |
| H  | 28 | 1.091 | 27 | 111.689 |
| H  | 34 | 1.080 | 32 | 119.652 |

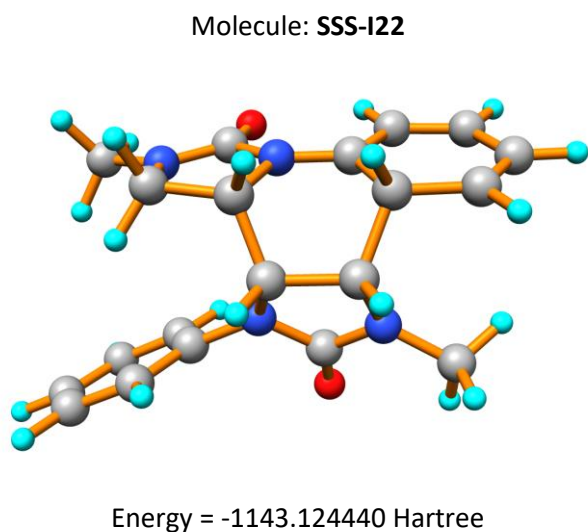

| 47 |    |       |    |         |
|----|----|-------|----|---------|
| C  |    |       |    | 1       |
| O  |    | 1     |    | 1.197   |
| N  | 1  | 1.385 | 2  | 126.446 |
| N  | 1  | 1.373 | 2  | 126.164 |
| C  | 4  | 1.419 | 1  | 112.682 |
| C  | 3  | 1.434 | 1  | 111.816 |
| H  | 6  | 1.090 | 3  | 112.763 |
| H  | 5  | 1.090 | 4  | 111.695 |
| C  | 3  | 1.418 | 1  | 119.579 |
| C  | 9  | 1.384 | 3  | 118.639 |
| C  | 9  | 1.386 | 3  | 121.059 |
| C  | 10 | 1.383 | 9  | 119.605 |
| H  | 10 | 1.078 | 9  | 119.318 |
| C  | 11 | 1.383 | 9  | 119.701 |
| H  | 11 | 1.080 | 9  | 120.587 |
| C  | 14 | 1.383 | 11 | 120.221 |
| H  | 12 | 1.078 | 10 | 119.508 |
| H  | 14 | 1.078 | 11 | 119.590 |
| H  | 16 | 1.078 | 14 | 120.051 |
| C  | 4  | 1.438 | 1  | 120.162 |
| H  | 20 | 1.084 | 4  | 106.903 |
| H  | 20 | 1.085 | 4  | 111.989 |
| H  | 20 | 1.089 | 4  | 110.864 |
| C  | 3  | 3.318 | 1  | 115.951 |
| O  | 24 | 1.197 | 3  | 124.736 |
| N  | 24 | 1.439 | 3  | 58.543  |
| N  | 24 | 1.333 | 3  | 78.831  |
| C  | 27 | 1.435 | 24 | 114.895 |
| C  | 26 | 1.444 | 24 | 111.254 |
| H  | 29 | 1.089 | 26 | 109.955 |
| H  | 28 | 1.089 | 27 | 110.762 |
| C  | 26 | 1.318 | 24 | 126.992 |
| C  | 32 | 1.406 | 26 | 124.843 |
| C  | 32 | 1.481 | 26 | 113.697 |
| C  | 33 | 1.359 | 32 | 117.988 |
| H  | 33 | 1.074 | 32 | 119.903 |
| C  | 34 | 1.473 | 32 | 115.373 |
| C  | 37 | 1.337 | 34 | 121.575 |
| H  | 35 | 1.080 | 33 | 118.125 |
| H  | 37 | 1.080 | 34 | 117.120 |
| H  | 38 | 1.077 | 37 | 121.147 |
| C  | 27 | 1.437 | 24 | 122.325 |
| H  | 42 | 1.087 | 27 | 110.489 |
| H  | 42 | 1.083 | 27 | 107.963 |
| H  | 42 | 1.087 | 27 | 109.764 |
| H  | 28 | 1.086 | 27 | 110.767 |
| H  | 34 | 1.097 | 32 | 107.736 |

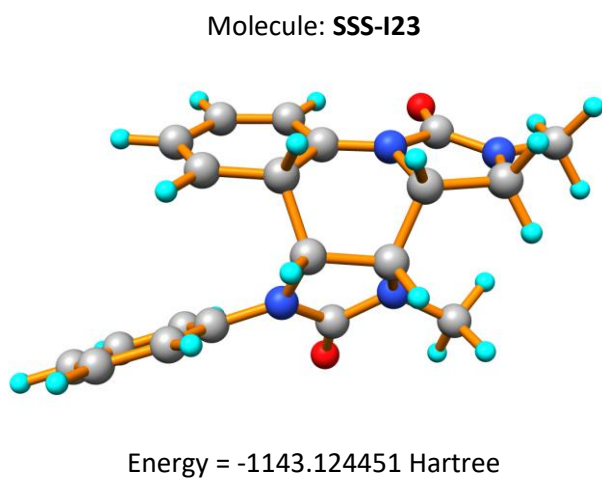

|    |    |       |    |         |          |
|----|----|-------|----|---------|----------|
| 47 |    |       |    |         |          |
| C  |    |       |    |         | 1        |
| O  |    |       | 1  |         | 1.198    |
| N  | 1  | 1.378 | 2  |         | 126.919  |
| N  | 1  | 1.381 | 2  | 125.745 | 3 179.9  |
| C  | 4  | 1.430 | 1  | 111.209 | 2 191.4  |
| C  | 3  | 1.421 | 1  | 111.940 | 2 180.9  |
| H  | 6  | 1.086 | 3  | 112.282 | 1 228.5  |
| H  | 5  | 1.093 | 4  | 112.033 | 1 101.4  |
| C  | 3  | 1.411 | 1  | 123.938 | 2 1.7    |
| C  | 9  | 1.387 | 3  | 120.218 | 1 320.0  |
| C  | 9  | 1.388 | 3  | 119.689 | 1 140.4  |
| C  | 10 | 1.381 | 9  | 119.425 | 3 180.6  |
| H  | 10 | 1.076 | 9  | 119.729 | 3 2.0    |
| C  | 11 | 1.382 | 9  | 119.931 | 3 178.5  |
| H  | 11 | 1.080 | 9  | 120.559 | 3 356.9  |
| C  | 14 | 1.382 | 11 | 120.191 | 9 1.0    |
| H  | 12 | 1.078 | 10 | 119.253 | 9 180.7  |
| H  | 14 | 1.078 | 11 | 119.537 | 9 179.9  |
| H  | 16 | 1.078 | 14 | 120.164 | 11 179.3 |
| C  | 4  | 1.442 | 1  | 117.675 | 2 340.8  |
| H  | 20 | 1.084 | 4  | 107.029 | 1 12.5   |
| H  | 20 | 1.086 | 4  | 111.718 | 1 131.0  |
| H  | 20 | 1.090 | 4  | 111.048 | 1 253.8  |
| C  | 22 | 3.170 | 20 | 115.688 | 4 4.3    |
| O  | 24 | 1.197 | 22 | 118.133 | 20 244.0 |
| N  | 24 | 1.431 | 22 | 91.087  | 20 15.1  |
| N  | 24 | 1.339 | 22 | 54.934  | 20 123.6 |
| C  | 27 | 1.435 | 24 | 114.626 | 22 275.2 |
| C  | 26 | 1.443 | 24 | 111.453 | 22 49.9  |
| H  | 29 | 1.090 | 26 | 110.202 | 24 127.7 |
| H  | 28 | 1.088 | 27 | 111.338 | 24 131.2 |
| C  | 26 | 1.325 | 24 | 126.749 | 22 245.6 |
| C  | 32 | 1.400 | 26 | 124.988 | 24 351.5 |
| C  | 32 | 1.481 | 26 | 113.749 | 24 171.0 |
| C  | 33 | 1.364 | 32 | 118.012 | 26 181.5 |
| H  | 33 | 1.074 | 32 | 120.032 | 26 1.3   |
| C  | 34 | 1.473 | 32 | 115.623 | 26 176.9 |
| C  | 37 | 1.340 | 34 | 121.397 | 32 2.5   |
| H  | 35 | 1.080 | 33 | 117.900 | 32 180.1 |
| H  | 37 | 1.078 | 34 | 117.339 | 32 182.9 |
| H  | 38 | 1.077 | 37 | 121.012 | 34 179.9 |
| C  | 27 | 1.438 | 24 | 121.873 | 22 104.0 |
| H  | 42 | 1.087 | 27 | 110.327 | 24 233.2 |
| H  | 42 | 1.083 | 27 | 107.937 | 24 352.6 |
| H  | 42 | 1.087 | 27 | 110.693 | 24 112.2 |
| H  | 28 | 1.089 | 27 | 110.877 | 24 251.4 |
| H  | 34 | 1.097 | 32 | 106.660 | 26 58.1  |

Molecule: **SSS-TS22**

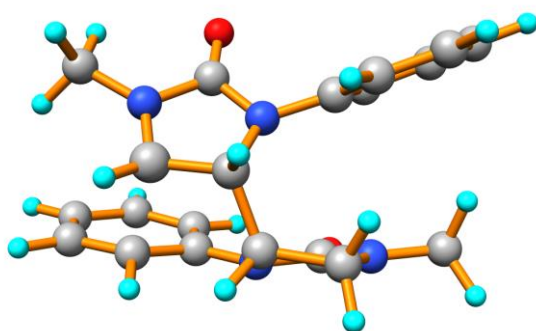

Energy = -1143.112857 Hartree

Imag. Freq. = -286.2390 cm<sup>-1</sup>

|    |    |       |    |         |          |
|----|----|-------|----|---------|----------|
| 47 |    |       |    |         |          |
| C  |    |       |    |         | 1        |
| O  |    |       | 1  |         | 1.191    |
| N  | 1  | 1.369 | 2  |         | 129.586  |
| N  | 1  | 1.413 | 2  | 124.346 | 3 178.2  |
| C  | 4  | 1.327 | 1  | 111.138 | 2 175.4  |
| C  | 3  | 1.437 | 1  | 111.771 | 2 175.4  |
| H  | 6  | 1.094 | 3  | 112.431 | 1 255.3  |
| H  | 5  | 1.078 | 4  | 119.223 | 1 155.4  |
| C  | 3  | 1.424 | 1  | 119.660 | 2 14.2   |
| C  | 9  | 1.384 | 3  | 118.791 | 1 298.8  |
| C  | 9  | 1.385 | 3  | 120.383 | 1 116.0  |
| C  | 10 | 1.382 | 9  | 119.303 | 3 176.8  |
| H  | 10 | 1.078 | 9  | 119.719 | 3 357.4  |
| C  | 11 | 1.384 | 9  | 119.476 | 3 182.1  |
| H  | 11 | 1.080 | 9  | 120.613 | 3 0.3    |
| C  | 14 | 1.384 | 11 | 120.131 | 9 1.3    |
| H  | 12 | 1.078 | 10 | 119.438 | 9 180.7  |
| H  | 14 | 1.078 | 11 | 119.601 | 9 179.8  |
| H  | 16 | 1.078 | 14 | 119.990 | 11 178.9 |
| C  | 4  | 1.443 | 1  | 121.125 | 2 352.9  |
| H  | 20 | 1.083 | 4  | 110.044 | 1 135.8  |
| H  | 20 | 1.086 | 4  | 110.339 | 1 257.3  |
| H  | 20 | 1.083 | 4  | 107.138 | 1 16.3   |
| C  | 3  | 3.162 | 1  | 124.642 | 2 268.8  |
| O  | 24 | 1.202 | 3  | 117.039 | 1 41.6   |
| N  | 24 | 1.417 | 3  | 63.312  | 1 283.4  |
| N  | 24 | 1.342 | 3  | 84.141  | 1 171.8  |
| C  | 27 | 1.429 | 24 | 113.744 | 3 60.0   |
| C  | 26 | 1.435 | 24 | 109.923 | 3 299.2  |
| H  | 29 | 1.087 | 26 | 112.757 | 24 220.8 |
| H  | 28 | 1.090 | 27 | 111.569 | 24 106.2 |
| C  | 26 | 1.363 | 24 | 125.138 | 3 89.1   |
| C  | 32 | 1.397 | 26 | 124.448 | 24 0.3   |
| C  | 32 | 1.419 | 26 | 115.847 | 24 185.7 |
| C  | 33 | 1.372 | 32 | 118.679 | 26 184.7 |
| H  | 33 | 1.074 | 32 | 119.879 | 26 4.5   |
| C  | 34 | 1.415 | 32 | 119.596 | 26 180.4 |
| C  | 37 | 1.361 | 34 | 120.052 | 32 352.8 |
| H  | 35 | 1.079 | 33 | 118.348 | 32 178.5 |
| H  | 37 | 1.079 | 34 | 118.956 | 32 173.3 |
| H  | 38 | 1.078 | 37 | 120.973 | 34 182.0 |
| C  | 27 | 1.434 | 24 | 122.842 | 3 241.3  |
| H  | 42 | 1.087 | 27 | 110.933 | 24 241.6 |
| H  | 42 | 1.083 | 27 | 107.737 | 24 1.2   |
| H  | 42 | 1.088 | 27 | 109.853 | 24 120.3 |
| H  | 28 | 1.087 | 27 | 111.121 | 24 227.2 |
| H  | 34 | 1.080 | 32 | 117.493 | 26 333.0 |



Molecule: **SSS-TS23**

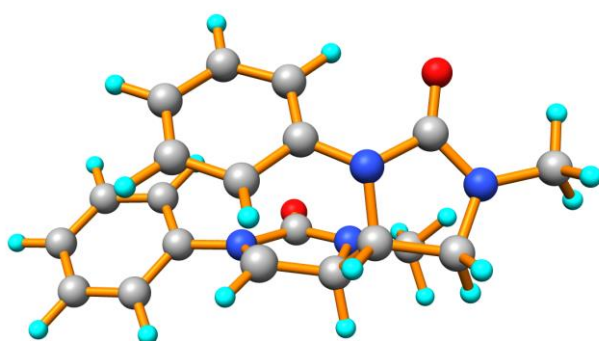

Energy = -1143.111074 Hartree

Imag. Freq. = -287.7437 cm<sup>-1</sup>

| 47 |    |       |    |         |
|----|----|-------|----|---------|
| C  |    |       |    | 1       |
| O  |    | 1     |    | 1.192   |
| N  | 1  | 1.425 | 2  | 125.223 |
| N  | 1  | 1.360 | 2  | 128.638 |
| C  | 4  | 1.430 | 1  | 112.052 |
| C  | 3  | 1.329 | 1  | 110.267 |
| H  | 6  | 1.076 | 3  | 119.422 |
| H  | 5  | 1.096 | 4  | 111.691 |
| C  | 3  | 1.418 | 1  | 123.917 |
| C  | 9  | 1.385 | 3  | 119.963 |
| C  | 9  | 1.385 | 3  | 118.968 |
| C  | 10 | 1.380 | 9  | 118.858 |
| H  | 10 | 1.076 | 9  | 120.094 |
| C  | 11 | 1.382 | 9  | 119.407 |
| H  | 11 | 1.080 | 9  | 120.799 |
| C  | 14 | 1.383 | 11 | 120.065 |
| H  | 12 | 1.078 | 10 | 119.301 |
| H  | 14 | 1.078 | 11 | 119.598 |
| H  | 16 | 1.078 | 14 | 119.998 |
| C  | 4  | 1.445 | 1  | 119.014 |
| H  | 20 | 1.084 | 4  | 107.087 |
| H  | 20 | 1.083 | 4  | 111.306 |
| H  | 20 | 1.089 | 4  | 110.498 |
| C  | 22 | 2.899 | 20 | 122.153 |
| O  | 24 | 1.200 | 22 | 112.271 |
| N  | 24 | 1.407 | 22 | 95.259  |
| N  | 24 | 1.351 | 22 | 57.939  |
| C  | 27 | 1.432 | 24 | 113.287 |
| C  | 26 | 1.433 | 24 | 111.366 |
| H  | 29 | 1.089 | 26 | 112.424 |
| H  | 28 | 1.089 | 27 | 111.554 |
| C  | 26 | 1.369 | 24 | 125.303 |
| C  | 32 | 1.393 | 26 | 124.210 |
| C  | 32 | 1.415 | 26 | 115.880 |
| C  | 33 | 1.375 | 32 | 118.554 |
| H  | 33 | 1.075 | 32 | 120.064 |
| C  | 34 | 1.413 | 32 | 119.832 |
| C  | 37 | 1.363 | 34 | 119.835 |
| H  | 35 | 1.079 | 33 | 118.343 |
| H  | 37 | 1.079 | 34 | 119.237 |
| H  | 38 | 1.077 | 37 | 120.759 |
| C  | 27 | 1.436 | 24 | 121.897 |
| H  | 42 | 1.084 | 27 | 107.680 |
| H  | 42 | 1.088 | 27 | 111.059 |
| H  | 42 | 1.087 | 27 | 110.617 |
| H  | 28 | 1.090 | 27 | 111.358 |
| H  | 34 | 1.080 | 32 | 117.468 |

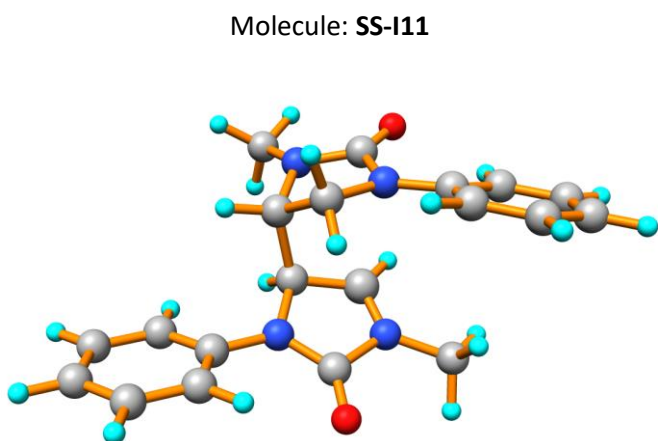

Energy = -1143.120426 Hartree

| 47 |    |       |    |         |
|----|----|-------|----|---------|
| C  |    |       |    | 1       |
| O  |    | 1     |    | 1.200   |
| N  | 1  | 1.395 | 2  | 127.478 |
| N  | 1  | 1.371 | 2  | 126.618 |
| C  | 3  | 1.443 | 1  | 109.158 |
| H  | 5  | 1.089 | 3  | 112.420 |
| C  | 3  | 1.405 | 1  | 126.376 |
| C  | 7  | 1.392 | 3  | 120.486 |
| C  | 7  | 1.389 | 3  | 119.203 |
| C  | 8  | 1.381 | 7  | 119.282 |
| H  | 8  | 1.076 | 7  | 120.171 |
| C  | 9  | 1.383 | 7  | 119.821 |
| H  | 9  | 1.078 | 7  | 120.792 |
| C  | 12 | 1.382 | 9  | 120.463 |
| H  | 10 | 1.079 | 8  | 119.028 |
| H  | 12 | 1.078 | 9  | 119.267 |
| H  | 14 | 1.078 | 12 | 120.272 |
| C  | 4  | 1.438 | 1  | 121.658 |
| H  | 18 | 1.084 | 4  | 107.358 |
| H  | 18 | 1.090 | 4  | 112.212 |
| H  | 18 | 1.085 | 4  | 110.428 |
| C  | 4  | 1.425 | 1  | 109.747 |
| H  | 22 | 1.085 | 4  | 113.527 |
| C  | 5  | 3.403 | 3  | 97.030  |
| O  | 24 | 1.189 | 5  | 132.064 |
| N  | 24 | 1.352 | 5  | 61.078  |
| N  | 24 | 1.453 | 5  | 71.403  |
| C  | 26 | 1.436 | 24 | 111.828 |
| C  | 26 | 1.420 | 24 | 125.118 |
| C  | 29 | 1.386 | 26 | 120.488 |
| C  | 29 | 1.386 | 26 | 118.828 |
| C  | 30 | 1.382 | 29 | 118.997 |
| H  | 30 | 1.076 | 29 | 120.565 |
| C  | 31 | 1.382 | 29 | 119.572 |
| H  | 31 | 1.079 | 29 | 121.026 |
| C  | 34 | 1.382 | 31 | 120.253 |
| H  | 32 | 1.078 | 30 | 119.086 |
| H  | 34 | 1.078 | 31 | 119.428 |
| H  | 36 | 1.078 | 34 | 120.125 |
| C  | 27 | 1.450 | 24 | 120.119 |
| H  | 40 | 1.085 | 27 | 108.980 |
| H  | 40 | 1.083 | 27 | 108.260 |
| H  | 40 | 1.082 | 27 | 108.941 |
| C  | 27 | 1.285 | 24 | 110.946 |
| H  | 5  | 1.086 | 3  | 111.217 |
| H  | 28 | 1.090 | 26 | 112.633 |
| H  | 44 | 1.078 | 27 | 122.693 |

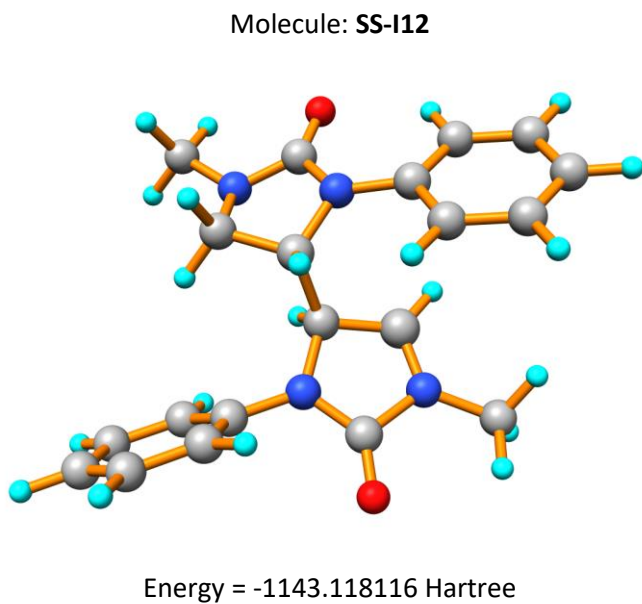

|    |    |       |    |         |          |
|----|----|-------|----|---------|----------|
| 47 |    |       |    |         |          |
| C  |    |       |    |         | 1        |
| O  |    |       | 1  |         | 1.200    |
| N  | 1  | 1.401 | 2  |         | 126.660  |
| N  | 1  | 1.364 | 2  | 126.824 | 3 181.5  |
| C  | 3  | 1.429 | 1  | 110.021 | 2 187.4  |
| H  | 5  | 1.084 | 3  | 113.541 | 1 216.8  |
| C  | 3  | 1.396 | 1  | 126.362 | 2 352.7  |
| C  | 7  | 1.396 | 3  | 122.234 | 1 354.3  |
| C  | 7  | 1.397 | 3  | 118.595 | 1 177.9  |
| C  | 8  | 1.379 | 7  | 119.459 | 3 183.8  |
| H  | 8  | 1.074 | 7  | 119.713 | 3 4.5    |
| C  | 9  | 1.388 | 7  | 120.467 | 3 176.3  |
| H  | 9  | 1.078 | 7  | 120.871 | 3 352.1  |
| C  | 12 | 1.378 | 9  | 120.377 | 7 359.9  |
| H  | 10 | 1.079 | 8  | 118.627 | 7 180.4  |
| H  | 12 | 1.079 | 9  | 119.160 | 7 178.3  |
| H  | 14 | 1.078 | 12 | 120.558 | 9 179.5  |
| C  | 4  | 1.439 | 1  | 120.003 | 2 344.4  |
| H  | 18 | 1.083 | 4  | 107.817 | 1 26.6   |
| H  | 18 | 1.085 | 4  | 110.150 | 1 145.9  |
| H  | 18 | 1.089 | 4  | 111.439 | 1 267.2  |
| C  | 4  | 1.433 | 1  | 110.422 | 2 194.0  |
| H  | 22 | 1.092 | 4  | 112.027 | 1 88.2   |
| C  | 6  | 3.372 | 5  | 86.434  | 3 237.8  |
| O  | 24 | 1.188 | 6  | 134.041 | 5 195.9  |
| N  | 24 | 1.348 | 6  | 44.599  | 5 306.8  |
| N  | 24 | 1.455 | 6  | 84.197  | 5 64.5   |
| C  | 26 | 1.437 | 24 | 112.518 | 6 62.2   |
| C  | 26 | 1.423 | 24 | 122.667 | 6 240.7  |
| C  | 29 | 1.382 | 26 | 119.567 | 24 58.2  |
| C  | 29 | 1.385 | 26 | 119.200 | 24 239.2 |
| C  | 30 | 1.383 | 29 | 119.063 | 26 180.7 |
| H  | 30 | 1.078 | 29 | 120.030 | 26 359.5 |
| C  | 31 | 1.382 | 29 | 119.199 | 26 180.2 |
| H  | 31 | 1.080 | 29 | 120.311 | 26 1.2   |
| C  | 32 | 1.383 | 30 | 120.247 | 29 359.3 |
| H  | 32 | 1.078 | 30 | 119.575 | 29 179.4 |
| H  | 34 | 1.078 | 31 | 119.720 | 29 180.0 |
| H  | 36 | 1.078 | 32 | 119.932 | 30 180.3 |
| C  | 27 | 1.448 | 24 | 120.698 | 6 141.4  |
| H  | 40 | 1.083 | 27 | 106.960 | 24 347.8 |
| H  | 40 | 1.084 | 27 | 109.859 | 24 106.7 |
| H  | 40 | 1.084 | 27 | 109.005 | 24 227.9 |
| C  | 27 | 1.284 | 24 | 110.824 | 6 323.0  |
| H  | 44 | 1.077 | 27 | 123.034 | 24 183.8 |
| H  | 22 | 1.085 | 4  | 112.184 | 1 210.5  |
| H  | 28 | 1.095 | 26 | 112.742 | 24 118.8 |

Molecule: **SS-I13**

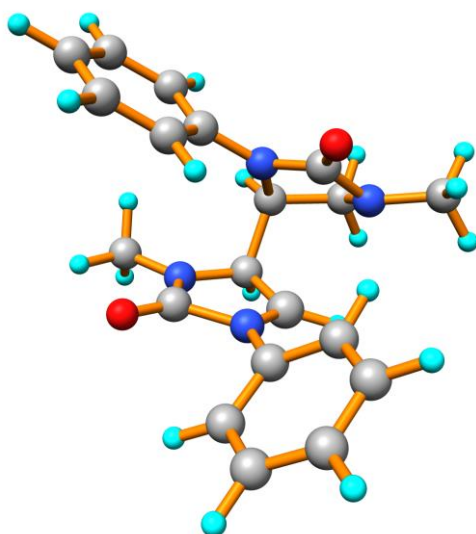

Energy = -1143.121189 Hartree

| 47 |    |       |    |         |
|----|----|-------|----|---------|
| C  |    |       |    | 1       |
| O  |    | 1     |    | 1.200   |
| N  | 1  | 1.378 | 2  | 127.770 |
| N  | 1  | 1.387 | 2  | 125.796 |
| C  | 3  | 1.428 | 1  | 110.294 |
| H  | 5  | 1.085 | 3  | 112.539 |
| C  | 3  | 1.416 | 1  | 124.315 |
| C  | 7  | 1.385 | 3  | 120.245 |
| C  | 7  | 1.387 | 3  | 119.229 |
| C  | 8  | 1.382 | 7  | 119.335 |
| H  | 8  | 1.078 | 7  | 119.860 |
| C  | 9  | 1.382 | 7  | 119.639 |
| H  | 9  | 1.080 | 7  | 120.193 |
| C  | 10 | 1.383 | 8  | 120.488 |
| H  | 10 | 1.078 | 8  | 119.368 |
| H  | 12 | 1.078 | 9  | 119.627 |
| H  | 14 | 1.078 | 10 | 120.099 |
| C  | 4  | 1.441 | 1  | 118.798 |
| H  | 18 | 1.084 | 4  | 107.863 |
| H  | 18 | 1.086 | 4  | 110.498 |
| H  | 18 | 1.089 | 4  | 111.340 |
| C  | 4  | 1.439 | 1  | 109.277 |
| H  | 22 | 1.091 | 4  | 112.023 |
| C  | 11 | 3.032 | 8  | 94.055  |
| O  | 24 | 1.186 | 11 | 80.947  |
| N  | 24 | 1.477 | 11 | 86.957  |
| N  | 24 | 1.339 | 11 | 104.946 |
| C  | 26 | 1.283 | 24 | 110.135 |
| C  | 26 | 1.421 | 24 | 122.928 |
| C  | 29 | 1.384 | 26 | 119.638 |
| C  | 29 | 1.385 | 26 | 117.979 |
| C  | 30 | 1.380 | 29 | 118.111 |
| H  | 30 | 1.076 | 29 | 120.754 |
| C  | 31 | 1.380 | 29 | 118.556 |
| H  | 31 | 1.079 | 29 | 120.451 |
| C  | 34 | 1.384 | 31 | 120.018 |
| H  | 32 | 1.078 | 30 | 119.395 |
| H  | 34 | 1.078 | 31 | 119.650 |
| H  | 36 | 1.078 | 34 | 119.777 |
| C  | 27 | 1.443 | 24 | 122.243 |
| H  | 40 | 1.083 | 27 | 107.363 |
| H  | 40 | 1.086 | 27 | 110.967 |
| H  | 40 | 1.086 | 27 | 110.114 |
| C  | 27 | 1.428 | 24 | 112.646 |
| H  | 22 | 1.089 | 4  | 111.850 |
| H  | 28 | 1.075 | 26 | 122.361 |
| H  | 44 | 1.090 | 27 | 112.530 |

Molecule: **SS-I14**

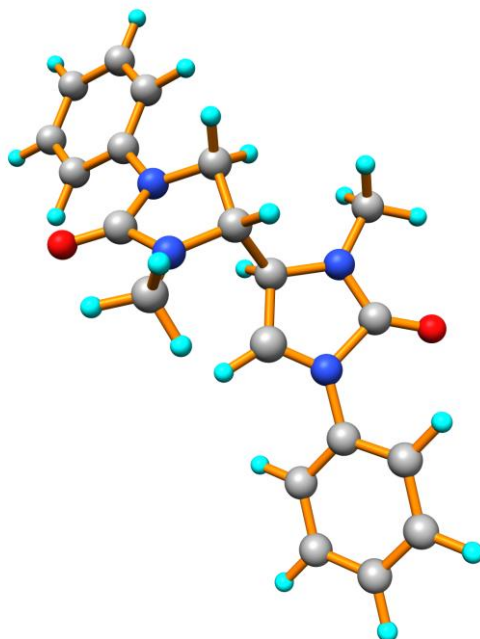

Energy = -1143.107990 Hartree

|    |    |       |    |         |          |
|----|----|-------|----|---------|----------|
| 47 |    |       |    |         |          |
| C  |    |       |    |         | 1        |
| O  |    |       | 1  |         | 1.199    |
| N  | 1  | 1.378 | 2  |         | 128.907  |
| N  | 1  | 1.385 | 2  | 124.795 | 3 181.7  |
| C  | 3  | 1.439 | 1  | 109.574 | 2 164.2  |
| H  | 5  | 1.091 | 3  | 112.071 | 1 271.4  |
| C  | 3  | 1.409 | 1  | 124.364 | 2 6.4    |
| C  | 7  | 1.389 | 3  | 120.471 | 1 325.9  |
| C  | 7  | 1.387 | 3  | 119.527 | 1 147.7  |
| C  | 8  | 1.380 | 7  | 119.373 | 3 181.3  |
| H  | 8  | 1.075 | 7  | 120.076 | 3 2.4    |
| C  | 9  | 1.383 | 7  | 119.918 | 3 178.2  |
| H  | 9  | 1.079 | 7  | 120.895 | 3 357.3  |
| C  | 12 | 1.381 | 9  | 120.412 | 7 0.3    |
| H  | 10 | 1.078 | 8  | 119.012 | 7 180.4  |
| H  | 12 | 1.078 | 9  | 119.302 | 7 179.9  |
| H  | 14 | 1.078 | 12 | 120.313 | 9 179.7  |
| C  | 4  | 1.433 | 1  | 121.886 | 2 344.5  |
| H  | 18 | 1.085 | 4  | 107.082 | 1 10.8   |
| H  | 18 | 1.091 | 4  | 112.200 | 1 129.9  |
| H  | 18 | 1.088 | 4  | 111.692 | 1 251.3  |
| C  | 4  | 1.421 | 1  | 111.530 | 2 175.3  |
| H  | 22 | 1.087 | 4  | 112.918 | 1 142.5  |
| C  | 23 | 3.473 | 22 | 83.587  | 4 124.1  |
| O  | 24 | 1.186 | 23 | 137.561 | 22 159.1 |
| N  | 24 | 1.479 | 23 | 81.795  | 22 291.4 |
| N  | 24 | 1.340 | 23 | 43.128  | 22 52.7  |
| C  | 26 | 1.282 | 24 | 109.648 | 23 36.6  |
| C  | 26 | 1.421 | 24 | 123.118 | 23 213.9 |
| C  | 29 | 1.385 | 26 | 119.440 | 24 41.6  |
| C  | 29 | 1.386 | 26 | 118.373 | 24 220.8 |
| C  | 30 | 1.381 | 29 | 118.165 | 26 178.3 |
| H  | 30 | 1.076 | 29 | 120.830 | 26 358.3 |
| C  | 31 | 1.379 | 29 | 118.740 | 26 181.8 |
| H  | 31 | 1.080 | 29 | 120.738 | 26 4.1   |
| C  | 32 | 1.384 | 30 | 120.501 | 29 0.3   |
| H  | 32 | 1.078 | 30 | 119.335 | 29 180.3 |
| H  | 34 | 1.078 | 31 | 119.673 | 29 180.6 |
| H  | 36 | 1.078 | 32 | 119.807 | 30 179.6 |
| C  | 27 | 1.444 | 24 | 121.160 | 23 123.0 |
| H  | 40 | 1.084 | 27 | 107.430 | 24 1.7   |
| H  | 40 | 1.086 | 27 | 110.406 | 24 120.6 |
| H  | 40 | 1.086 | 27 | 111.005 | 24 242.7 |
| C  | 27 | 1.431 | 24 | 113.076 | 23 299.1 |
| H  | 5  | 1.086 | 3  | 110.898 | 1 149.9  |
| H  | 28 | 1.077 | 26 | 122.844 | 24 180.5 |
| H  | 44 | 1.098 | 27 | 112.342 | 24 245.1 |

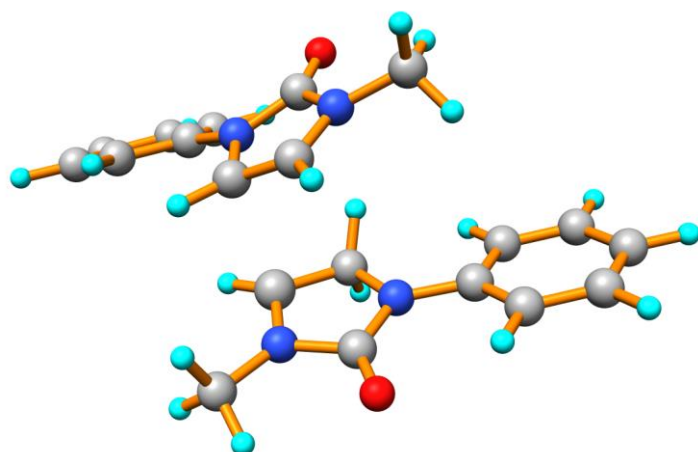

Energy = -1143.097558 Hartree

Imag. Freq. = -173.8029 cm<sup>-1</sup>

| 47 |    |       |    |         |          |
|----|----|-------|----|---------|----------|
| C  |    |       |    |         | 1        |
| O  |    |       | 1  |         | 1.194    |
| N  | 1  | 1.356 | 2  |         | 132.015  |
| N  | 1  | 1.433 | 2  | 122.496 | 3 181.7  |
| C  | 3  | 1.435 | 1  | 111.037 | 2 176.7  |
| H  | 5  | 1.094 | 3  | 112.127 | 1 256.3  |
| C  | 3  | 1.415 | 1  | 126.364 | 2 2.7    |
| C  | 7  | 1.388 | 3  | 121.102 | 1 345.7  |
| C  | 7  | 1.388 | 3  | 118.533 | 1 167.1  |
| C  | 8  | 1.382 | 7  | 119.029 | 3 181.3  |
| H  | 8  | 1.075 | 7  | 120.578 | 3 2.1    |
| C  | 9  | 1.382 | 7  | 119.724 | 3 178.5  |
| H  | 9  | 1.078 | 7  | 121.267 | 3 357.6  |
| C  | 12 | 1.382 | 9  | 120.404 | 7 0.1    |
| H  | 10 | 1.078 | 8  | 118.867 | 7 180.3  |
| H  | 12 | 1.078 | 9  | 119.237 | 7 179.7  |
| H  | 14 | 1.078 | 12 | 120.261 | 9 179.7  |
| C  | 4  | 1.443 | 1  | 120.379 | 2 1.6    |
| H  | 18 | 1.083 | 4  | 109.872 | 1 215.7  |
| H  | 18 | 1.083 | 4  | 107.364 | 1 335.7  |
| H  | 18 | 1.087 | 4  | 110.315 | 1 94.1   |
| C  | 4  | 1.307 | 1  | 110.595 | 2 172.0  |
| H  | 22 | 1.079 | 4  | 122.449 | 1 170.6  |
| C  | 5  | 3.341 | 3  | 115.449 | 1 106.9  |
| O  | 24 | 1.201 | 5  | 119.322 | 3 115.3  |
| N  | 24 | 1.378 | 5  | 71.418  | 3 241.2  |
| N  | 24 | 1.401 | 5  | 71.646  | 3 354.1  |
| C  | 26 | 1.388 | 24 | 109.708 | 5 63.8   |
| C  | 26 | 1.416 | 24 | 125.454 | 5 248.0  |
| C  | 29 | 1.387 | 26 | 120.310 | 24 28.4  |
| C  | 29 | 1.387 | 26 | 119.091 | 24 207.0 |
| C  | 30 | 1.382 | 29 | 119.073 | 26 178.4 |
| H  | 30 | 1.076 | 29 | 120.139 | 26 356.5 |
| C  | 31 | 1.382 | 29 | 119.593 | 26 182.4 |
| H  | 31 | 1.079 | 29 | 120.708 | 26 5.0   |
| C  | 34 | 1.383 | 31 | 120.282 | 29 359.2 |
| H  | 32 | 1.078 | 30 | 119.137 | 29 179.4 |
| H  | 34 | 1.078 | 31 | 119.431 | 29 180.4 |
| H  | 36 | 1.078 | 34 | 120.126 | 31 180.7 |
| C  | 27 | 1.445 | 24 | 121.469 | 5 117.1  |
| H  | 40 | 1.084 | 27 | 110.273 | 24 229.3 |
| H  | 40 | 1.083 | 27 | 106.907 | 24 348.8 |
| H  | 40 | 1.085 | 27 | 110.378 | 24 107.4 |
| C  | 27 | 1.341 | 24 | 110.380 | 5 293.9  |
| H  | 5  | 1.087 | 3  | 112.577 | 1 134.9  |
| H  | 28 | 1.073 | 26 | 121.876 | 24 161.2 |
| H  | 44 | 1.074 | 27 | 122.424 | 24 183.4 |

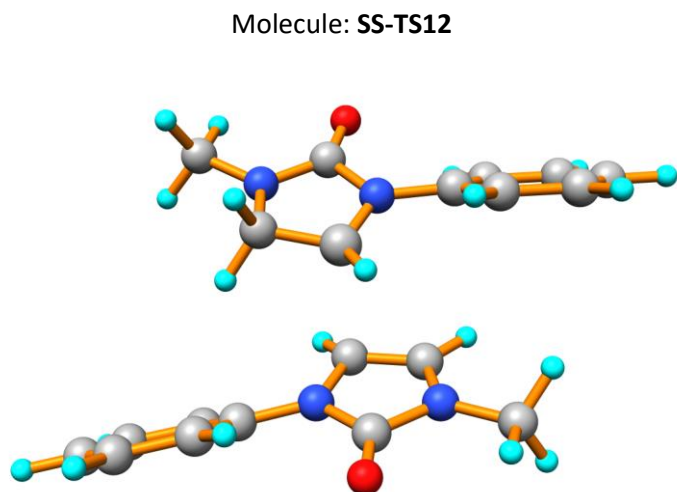

Energy = -1143.097571 Hartree

Imag. Freq. = -228.1080 cm<sup>-1</sup>

| 47 |    |       |    |         |
|----|----|-------|----|---------|
| C  |    |       |    | 1       |
| O  |    | 1     |    | 1.193   |
| N  | 1  | 1.445 | 2  | 124.598 |
| N  | 1  | 1.345 | 2  | 130.204 |
| C  | 3  | 1.320 | 1  | 110.556 |
| H  | 5  | 1.079 | 3  | 121.789 |
| C  | 3  | 1.414 | 1  | 124.260 |
| C  | 7  | 1.387 | 3  | 120.087 |
| C  | 7  | 1.387 | 3  | 118.719 |
| C  | 8  | 1.382 | 7  | 118.745 |
| H  | 8  | 1.076 | 7  | 120.364 |
| C  | 9  | 1.382 | 7  | 119.352 |
| H  | 9  | 1.080 | 7  | 120.503 |
| C  | 10 | 1.384 | 8  | 120.680 |
| H  | 10 | 1.078 | 8  | 119.227 |
| H  | 12 | 1.078 | 9  | 119.620 |
| H  | 14 | 1.078 | 10 | 120.012 |
| C  | 4  | 1.440 | 1  | 122.274 |
| H  | 18 | 1.083 | 4  | 107.636 |
| H  | 18 | 1.086 | 4  | 110.312 |
| H  | 18 | 1.087 | 4  | 110.976 |
| C  | 4  | 1.429 | 1  | 112.307 |
| H  | 22 | 1.095 | 4  | 112.084 |
| C  | 6  | 2.761 | 5  | 117.123 |
| O  | 24 | 1.200 | 6  | 122.753 |
| N  | 24 | 1.378 | 6  | 68.669  |
| N  | 24 | 1.401 | 6  | 71.516  |
| C  | 26 | 1.389 | 24 | 109.734 |
| C  | 26 | 1.416 | 24 | 124.729 |
| C  | 29 | 1.386 | 26 | 120.222 |
| C  | 29 | 1.387 | 26 | 119.034 |
| C  | 30 | 1.382 | 29 | 119.002 |
| H  | 30 | 1.077 | 29 | 120.052 |
| C  | 31 | 1.382 | 29 | 119.511 |
| H  | 31 | 1.079 | 29 | 120.535 |
| C  | 34 | 1.383 | 31 | 120.236 |
| H  | 32 | 1.078 | 30 | 119.183 |
| H  | 34 | 1.078 | 31 | 119.483 |
| H  | 36 | 1.078 | 34 | 120.102 |
| C  | 27 | 1.443 | 24 | 121.509 |
| H  | 40 | 1.085 | 27 | 110.572 |
| H  | 40 | 1.085 | 27 | 109.907 |
| H  | 40 | 1.083 | 27 | 107.038 |
| C  | 27 | 1.340 | 24 | 110.556 |
| H  | 44 | 1.074 | 27 | 122.670 |
| H  | 22 | 1.087 | 4  | 113.159 |
| H  | 28 | 1.074 | 26 | 121.981 |

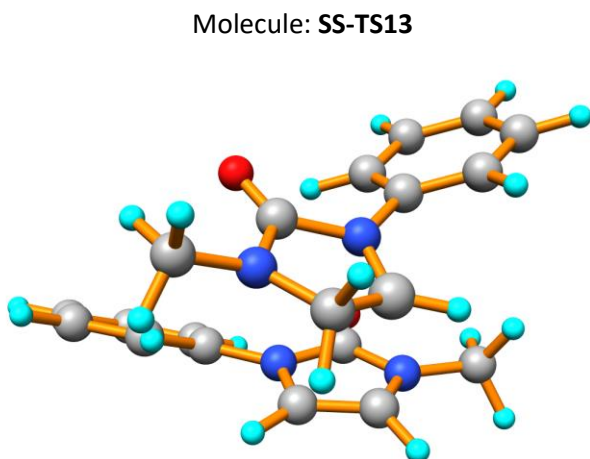

Energy = -1143.099205 Hartree

Imag. Freq. = -170.8280  $\text{cm}^{-1}$

| 47 |    |       |    |         |
|----|----|-------|----|---------|
| C  |    |       |    | 1       |
| O  |    | 1     |    | 1.190   |
| N  | 1  | 1.445 | 2  | 125.174 |
| N  | 1  | 1.355 | 2  | 129.502 |
| C  | 3  | 1.315 | 1  | 109.725 |
| H  | 5  | 1.076 | 3  | 120.569 |
| C  | 3  | 1.422 | 1  | 123.292 |
| C  | 7  | 1.384 | 3  | 120.101 |
| C  | 7  | 1.388 | 3  | 118.417 |
| C  | 8  | 1.383 | 7  | 118.531 |
| H  | 8  | 1.076 | 7  | 120.616 |
| C  | 9  | 1.379 | 7  | 119.168 |
| H  | 9  | 1.080 | 7  | 120.699 |
| C  | 10 | 1.382 | 8  | 120.668 |
| H  | 10 | 1.078 | 8  | 119.102 |
| H  | 12 | 1.078 | 9  | 119.653 |
| H  | 14 | 1.078 | 10 | 119.983 |
| C  | 4  | 1.441 | 1  | 120.984 |
| H  | 18 | 1.086 | 4  | 110.397 |
| H  | 18 | 1.088 | 4  | 111.143 |
| H  | 18 | 1.084 | 4  | 107.578 |
| C  | 4  | 1.430 | 1  | 111.820 |
| H  | 22 | 1.096 | 4  | 111.772 |
| C  | 11 | 2.910 | 8  | 93.204  |
| O  | 24 | 1.201 | 11 | 66.973  |
| N  | 24 | 1.411 | 11 | 90.168  |
| N  | 24 | 1.366 | 11 | 117.027 |
| C  | 26 | 1.345 | 24 | 109.351 |
| C  | 26 | 1.420 | 24 | 124.505 |
| C  | 29 | 1.386 | 26 | 120.270 |
| C  | 29 | 1.386 | 26 | 118.895 |
| C  | 30 | 1.382 | 29 | 118.822 |
| H  | 30 | 1.075 | 29 | 120.414 |
| C  | 31 | 1.380 | 29 | 119.608 |
| H  | 31 | 1.078 | 29 | 120.381 |
| C  | 32 | 1.383 | 30 | 120.864 |
| H  | 32 | 1.078 | 30 | 119.054 |
| H  | 34 | 1.078 | 31 | 119.598 |
| H  | 36 | 1.078 | 32 | 120.167 |
| C  | 27 | 1.439 | 24 | 122.017 |
| H  | 40 | 1.084 | 27 | 106.963 |
| H  | 40 | 1.088 | 27 | 111.036 |
| H  | 40 | 1.085 | 27 | 110.688 |
| C  | 28 | 1.370 | 26 | 108.549 |
| H  | 22 | 1.086 | 4  | 113.207 |
| H  | 28 | 1.073 | 26 | 122.094 |
| H  | 44 | 1.074 | 28 | 127.351 |



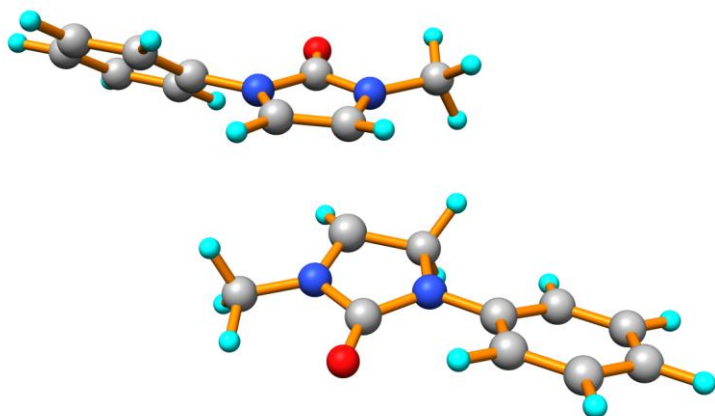

Energy = -1143.089035 Hartree

Imag. Freq. = -231.2093 cm<sup>-1</sup>

| 47 |    |       |    |         |          |
|----|----|-------|----|---------|----------|
| C  |    |       |    |         | 1        |
| O  |    |       | 1  |         | 1.193    |
| N  | 1  | 1.354 | 2  |         | 131.735  |
| N  | 1  | 1.432 | 2  | 122.771 | 3 180.6  |
| C  | 3  | 1.435 | 1  | 110.951 | 2 174.2  |
| H  | 5  | 1.095 | 3  | 111.780 | 1 259.8  |
| C  | 3  | 1.415 | 1  | 125.831 | 2 3.8    |
| C  | 7  | 1.387 | 3  | 120.776 | 1 336.0  |
| C  | 7  | 1.386 | 3  | 118.767 | 1 157.2  |
| C  | 8  | 1.381 | 7  | 119.029 | 3 180.9  |
| H  | 8  | 1.075 | 7  | 120.511 | 3 1.6    |
| C  | 9  | 1.382 | 7  | 119.706 | 3 178.8  |
| H  | 9  | 1.079 | 7  | 121.101 | 3 357.9  |
| C  | 12 | 1.381 | 9  | 120.339 | 7 0.2    |
| H  | 10 | 1.078 | 8  | 118.940 | 7 180.3  |
| H  | 12 | 1.078 | 9  | 119.338 | 7 179.8  |
| H  | 14 | 1.078 | 12 | 120.242 | 9 179.8  |
| C  | 4  | 1.438 | 1  | 120.620 | 2 358.1  |
| H  | 18 | 1.088 | 4  | 110.595 | 1 108.1  |
| H  | 18 | 1.084 | 4  | 110.293 | 1 229.2  |
| H  | 18 | 1.083 | 4  | 107.234 | 1 349.2  |
| C  | 4  | 1.318 | 1  | 111.482 | 2 173.0  |
| H  | 22 | 1.080 | 4  | 121.054 | 1 162.2  |
| C  | 23 | 2.853 | 22 | 114.801 | 4 126.0  |
| O  | 24 | 1.197 | 23 | 123.652 | 22 152.1 |
| N  | 24 | 1.415 | 23 | 74.588  | 22 277.0 |
| N  | 24 | 1.370 | 23 | 65.280  | 22 31.3  |
| C  | 26 | 1.338 | 24 | 109.550 | 23 60.7  |
| C  | 26 | 1.420 | 24 | 124.142 | 23 236.2 |
| C  | 29 | 1.384 | 26 | 119.751 | 24 40.3  |
| C  | 29 | 1.385 | 26 | 118.879 | 24 219.9 |
| C  | 30 | 1.382 | 29 | 118.715 | 26 178.9 |
| H  | 30 | 1.077 | 29 | 120.297 | 26 357.7 |
| C  | 31 | 1.381 | 29 | 119.193 | 26 181.7 |
| H  | 31 | 1.080 | 29 | 120.557 | 26 3.8   |
| C  | 32 | 1.383 | 30 | 120.568 | 29 359.6 |
| H  | 32 | 1.078 | 30 | 119.314 | 29 179.7 |
| H  | 34 | 1.078 | 31 | 119.595 | 29 180.3 |
| H  | 36 | 1.078 | 32 | 120.003 | 30 180.0 |
| C  | 27 | 1.442 | 24 | 120.956 | 23 120.8 |
| H  | 40 | 1.084 | 27 | 107.586 | 24 23.3  |
| H  | 40 | 1.085 | 27 | 109.816 | 24 142.2 |
| H  | 40 | 1.087 | 27 | 112.062 | 24 264.7 |
| C  | 28 | 1.376 | 26 | 109.031 | 24 355.0 |
| H  | 5  | 1.084 | 3  | 111.966 | 1 138.6  |
| H  | 28 | 1.073 | 26 | 122.218 | 24 176.3 |
| H  | 44 | 1.075 | 28 | 126.604 | 26 160.2 |

Reaction depicted on Scheme S3

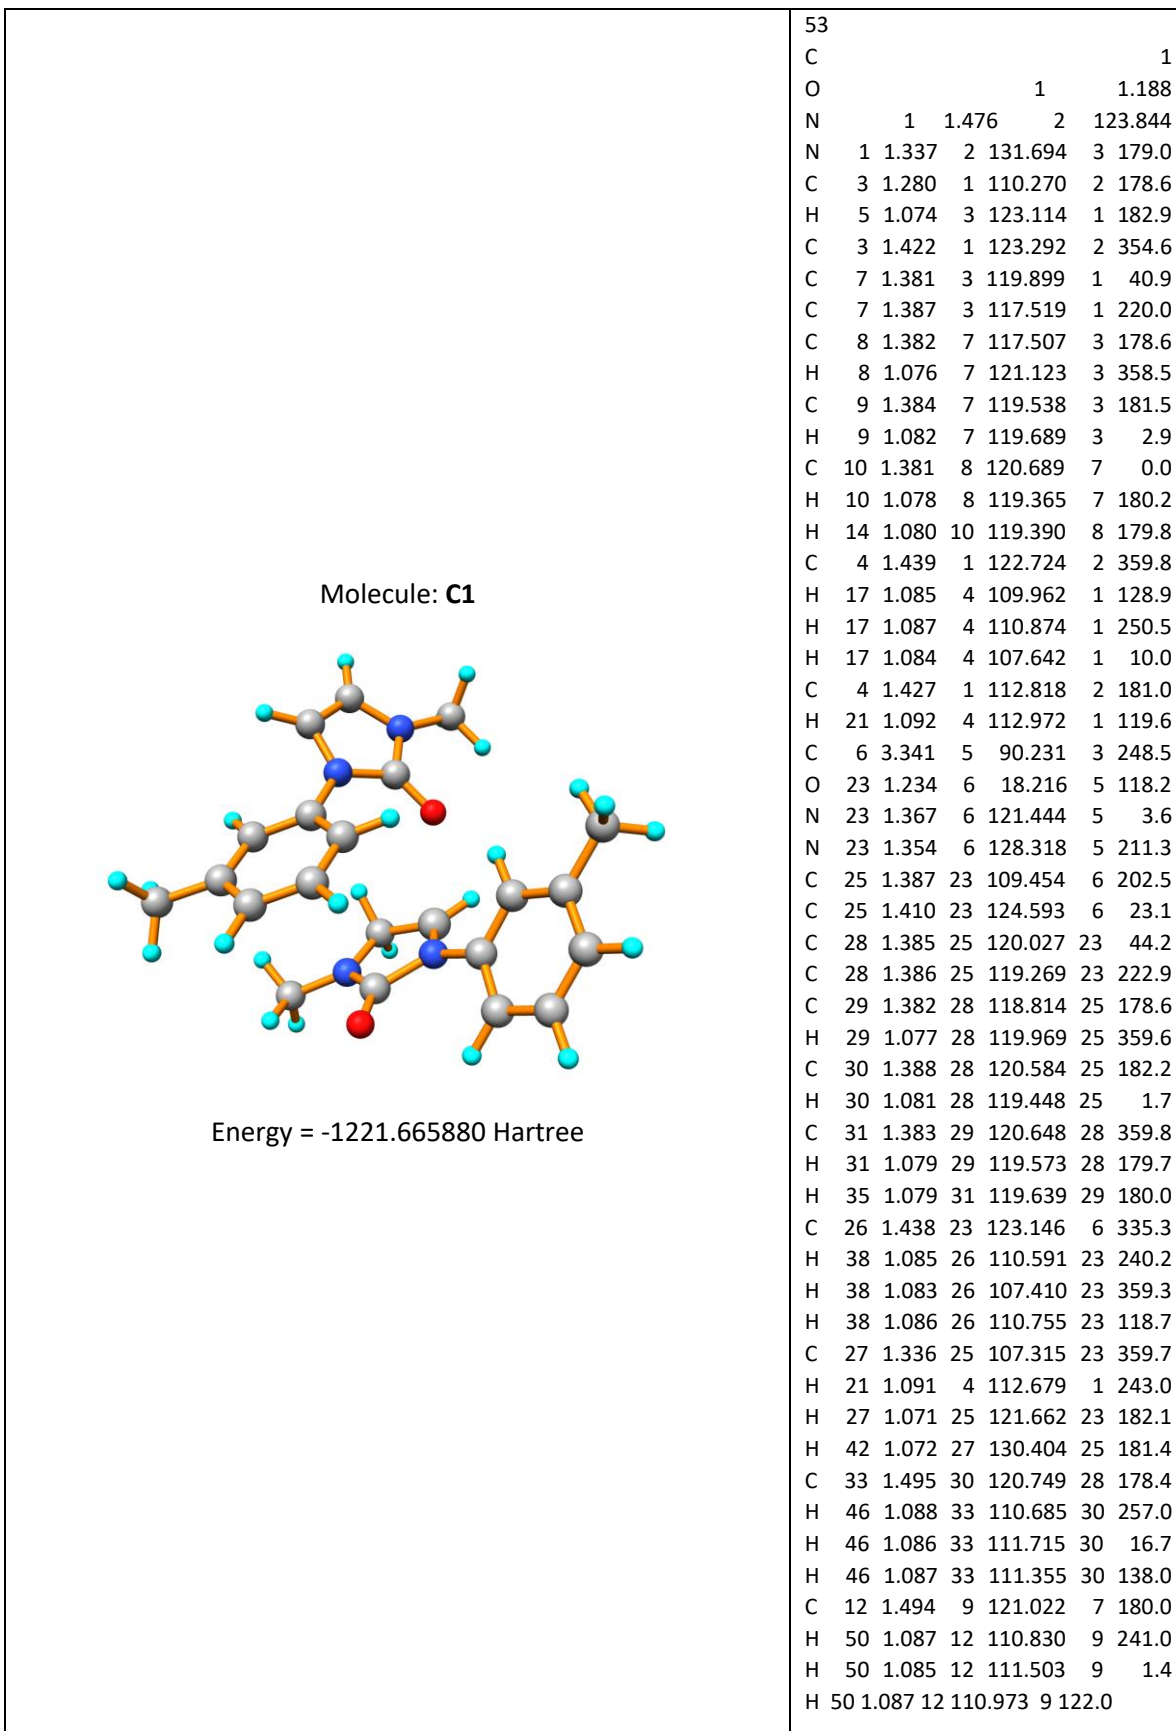

Molecule: **RS-I12-Me**

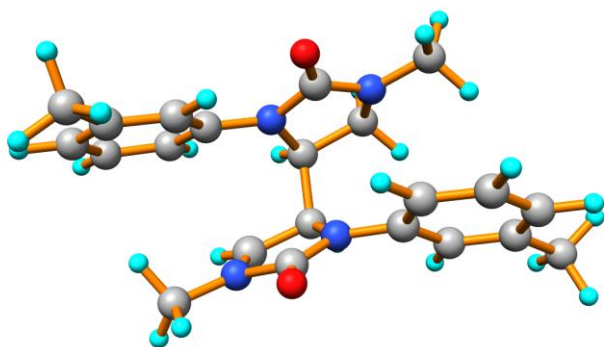

Energy = -1221.659156 Hartree

53

|   |    |       |    |         |
|---|----|-------|----|---------|
| C |    |       |    | 1       |
| O |    |       | 1  | 1.187   |
| N | 1  | 1.350 | 2  | 132.942 |
| N | 1  | 1.458 | 2  | 122.208 |
| C | 4  | 1.277 | 1  | 110.629 |
| C | 3  | 1.436 | 1  | 111.859 |
| H | 6  | 1.091 | 3  | 112.947 |
| H | 5  | 1.077 | 4  | 122.966 |
| C | 3  | 1.425 | 1  | 121.858 |
| C | 9  | 1.381 | 3  | 119.249 |
| C | 9  | 1.385 | 3  | 119.446 |
| C | 10 | 1.383 | 9  | 118.367 |
| H | 10 | 1.077 | 9  | 120.503 |
| C | 11 | 1.387 | 9  | 120.385 |
| H | 11 | 1.081 | 9  | 120.482 |
| C | 12 | 1.381 | 10 | 120.723 |
| H | 12 | 1.078 | 10 | 119.320 |
| H | 16 | 1.079 | 12 | 119.710 |
| C | 4  | 1.447 | 1  | 120.722 |
| H | 19 | 1.086 | 4  | 107.991 |
| H | 19 | 1.083 | 4  | 109.797 |
| H | 19 | 1.083 | 4  | 107.162 |
| C | 3  | 3.155 | 1  | 106.779 |
| O | 23 | 1.203 | 3  | 119.087 |
| N | 23 | 1.403 | 3  | 65.461  |
| N | 23 | 1.351 | 3  | 79.682  |
| C | 26 | 1.425 | 23 | 112.871 |
| C | 25 | 1.424 | 23 | 110.113 |
| H | 28 | 1.086 | 25 | 113.548 |
| H | 27 | 1.092 | 26 | 112.120 |
| C | 25 | 1.401 | 23 | 125.976 |
| C | 31 | 1.393 | 25 | 121.625 |
| C | 31 | 1.393 | 25 | 118.964 |
| C | 32 | 1.387 | 31 | 120.665 |
| H | 32 | 1.076 | 31 | 119.238 |
| C | 33 | 1.387 | 31 | 119.786 |
| C | 36 | 1.378 | 33 | 120.577 |
| H | 36 | 1.079 | 33 | 119.317 |
| H | 37 | 1.079 | 36 | 120.077 |
| C | 26 | 1.431 | 23 | 123.125 |
| H | 40 | 1.088 | 26 | 111.302 |
| H | 40 | 1.084 | 26 | 107.638 |
| H | 40 | 1.088 | 26 | 109.958 |
| H | 27 | 1.088 | 26 | 111.373 |
| H | 33 | 1.079 | 31 | 120.870 |
| C | 34 | 1.494 | 32 | 120.024 |
| H | 46 | 1.088 | 34 | 110.060 |
| H | 46 | 1.086 | 34 | 111.573 |
| H | 46 | 1.085 | 34 | 111.608 |
| C | 14 | 1.495 | 11 | 120.958 |
| H | 50 | 1.087 | 14 | 111.168 |
| H | 50 | 1.088 | 14 | 110.678 |
| H | 50 | 1.086 | 14 | 111.741 |

Molecule: **RS-TS12-Me**

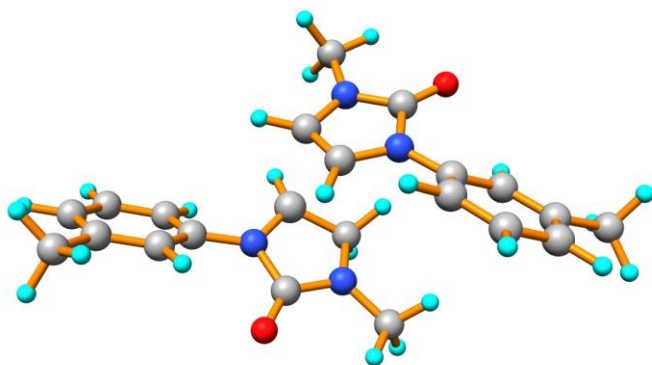

Energy = -1221.635863 Hartree

Imag. Freq. = -210.0126 cm<sup>-1</sup>

53

|   |    |       |    |         |          |
|---|----|-------|----|---------|----------|
| C |    |       |    |         | 1        |
| O |    |       | 1  |         | 1.199    |
| N | 1  | 1.413 | 2  |         | 127.462  |
| N | 1  | 1.370 | 2  | 128.191 | 3 181.7  |
| C | 4  | 1.380 | 1  | 110.616 | 2 178.2  |
| C | 3  | 1.344 | 1  | 109.648 | 2 179.2  |
| H | 6  | 1.073 | 3  | 122.118 | 1 181.1  |
| H | 5  | 1.075 | 4  | 122.029 | 1 161.4  |
| C | 3  | 1.419 | 1  | 124.605 | 2 358.0  |
| C | 9  | 1.385 | 3  | 119.432 | 1 325.1  |
| C | 9  | 1.383 | 3  | 119.197 | 1 147.1  |
| C | 10 | 1.386 | 9  | 119.967 | 3 182.3  |
| H | 10 | 1.078 | 9  | 119.929 | 3 4.0    |
| C | 11 | 1.382 | 9  | 118.618 | 3 176.8  |
| H | 11 | 1.079 | 9  | 120.871 | 3 355.2  |
| C | 14 | 1.381 | 11 | 120.436 | 9 0.9    |
| H | 14 | 1.078 | 11 | 119.527 | 9 180.0  |
| H | 16 | 1.079 | 14 | 119.617 | 11 179.5 |
| C | 4  | 1.440 | 1  | 121.948 | 2 354.6  |
| H | 19 | 1.085 | 4  | 110.747 | 1 243.2  |
| H | 19 | 1.084 | 4  | 107.031 | 1 2.3    |
| H | 19 | 1.087 | 4  | 111.222 | 1 121.2  |
| C | 7  | 2.870 | 6  | 102.359 | 3 252.2  |
| O | 23 | 1.193 | 7  | 105.744 | 6 183.9  |
| N | 23 | 1.436 | 7  | 82.380  | 6 308.3  |
| N | 23 | 1.352 | 7  | 77.200  | 6 56.0   |
| C | 26 | 1.428 | 23 | 111.965 | 7 274.1  |
| C | 25 | 1.322 | 23 | 109.786 | 7 69.2   |
| H | 28 | 1.076 | 25 | 120.742 | 23 167.0 |
| H | 27 | 1.089 | 26 | 113.106 | 23 137.6 |
| C | 25 | 1.419 | 23 | 124.656 | 7 255.3  |
| C | 31 | 1.385 | 25 | 120.017 | 23 38.1  |
| C | 31 | 1.384 | 25 | 118.424 | 23 216.7 |
| C | 32 | 1.386 | 31 | 119.762 | 25 178.3 |
| H | 32 | 1.077 | 31 | 120.019 | 25 356.9 |
| C | 33 | 1.381 | 31 | 118.615 | 25 182.4 |
| C | 36 | 1.381 | 33 | 120.237 | 31 359.3 |
| H | 36 | 1.078 | 33 | 119.677 | 31 180.2 |
| H | 37 | 1.079 | 36 | 119.519 | 33 180.5 |
| C | 26 | 1.441 | 23 | 121.998 | 7 109.6  |
| H | 40 | 1.083 | 26 | 107.553 | 23 343.2 |
| H | 40 | 1.088 | 26 | 110.955 | 23 102.3 |
| H | 40 | 1.085 | 26 | 110.064 | 23 223.9 |
| H | 27 | 1.095 | 26 | 112.331 | 23 259.5 |
| H | 33 | 1.079 | 31 | 120.805 | 25 4.6   |
| C | 12 | 1.494 | 10 | 120.622 | 9 182.0  |
| H | 46 | 1.085 | 12 | 111.651 | 10 340.3 |
| H | 46 | 1.088 | 12 | 110.371 | 10 99.8  |
| H | 46 | 1.086 | 12 | 111.339 | 10 219.0 |
| C | 34 | 1.494 | 32 | 120.693 | 31 178.5 |
| H | 50 | 1.088 | 34 | 110.436 | 32 256.2 |
| H | 50 | 1.085 | 34 | 111.627 | 32 15.9  |
| H | 50 | 1.086 | 34 | 111.234 | 32 137.1 |

Molecule: **SRS-I22-Me**

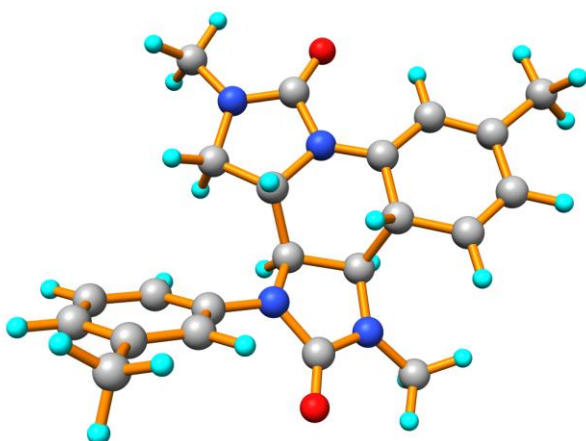

Energy = -1221.668627 Hartree

53

|   |    |       |    |         |
|---|----|-------|----|---------|
| C |    |       |    | 1       |
| O |    |       | 1  | 1.197   |
| N | 1  | 1.387 | 2  | 127.287 |
| N | 1  | 1.375 | 2  | 126.366 |
| C | 4  | 1.414 | 1  | 111.558 |
| C | 3  | 1.437 | 1  | 110.687 |
| H | 6  | 1.093 | 3  | 112.318 |
| H | 5  | 1.086 | 4  | 112.260 |
| C | 3  | 1.412 | 1  | 121.930 |
| C | 9  | 1.386 | 3  | 119.002 |
| C | 9  | 1.385 | 3  | 120.621 |
| C | 10 | 1.385 | 9  | 120.623 |
| H | 10 | 1.078 | 9  | 119.122 |
| C | 11 | 1.384 | 9  | 119.193 |
| H | 11 | 1.080 | 9  | 120.754 |
| C | 14 | 1.380 | 11 | 120.373 |
| H | 14 | 1.079 | 11 | 119.650 |
| H | 16 | 1.079 | 14 | 119.758 |
| C | 4  | 1.436 | 1  | 122.044 |
| H | 19 | 1.087 | 4  | 112.000 |
| H | 19 | 1.084 | 4  | 106.902 |
| H | 19 | 1.088 | 4  | 111.241 |
| C | 6  | 3.619 | 3  | 139.439 |
| O | 23 | 1.199 | 6  | 148.556 |
| N | 23 | 1.432 | 6  | 29.279  |
| N | 23 | 1.336 | 6  | 79.799  |
| C | 26 | 1.435 | 23 | 114.259 |
| C | 25 | 1.453 | 23 | 111.395 |
| H | 28 | 1.091 | 25 | 108.643 |
| H | 27 | 1.085 | 26 | 111.587 |
| C | 25 | 1.327 | 23 | 126.714 |
| C | 31 | 1.397 | 25 | 124.917 |
| C | 31 | 1.475 | 25 | 113.530 |
| C | 32 | 1.371 | 31 | 119.380 |
| H | 32 | 1.075 | 31 | 119.599 |
| C | 33 | 1.467 | 31 | 115.241 |
| C | 36 | 1.336 | 33 | 121.764 |
| H | 36 | 1.078 | 33 | 116.828 |
| H | 37 | 1.079 | 36 | 120.892 |
| C | 26 | 1.437 | 23 | 121.945 |
| H | 40 | 1.086 | 26 | 110.187 |
| H | 40 | 1.083 | 26 | 107.954 |
| H | 40 | 1.088 | 26 | 110.754 |
| H | 27 | 1.091 | 26 | 110.525 |
| H | 33 | 1.099 | 31 | 109.148 |
| C | 34 | 1.481 | 32 | 120.508 |
| H | 46 | 1.089 | 34 | 109.981 |
| H | 46 | 1.083 | 34 | 112.366 |
| H | 46 | 1.089 | 34 | 109.817 |
| C | 12 | 1.494 | 10 | 120.644 |
| H | 50 | 1.086 | 12 | 111.362 |
| H | 50 | 1.088 | 12 | 110.409 |
| H | 50 | 1.085 | 12 | 111.579 |

Molecule: **SRS-TS22-Me**

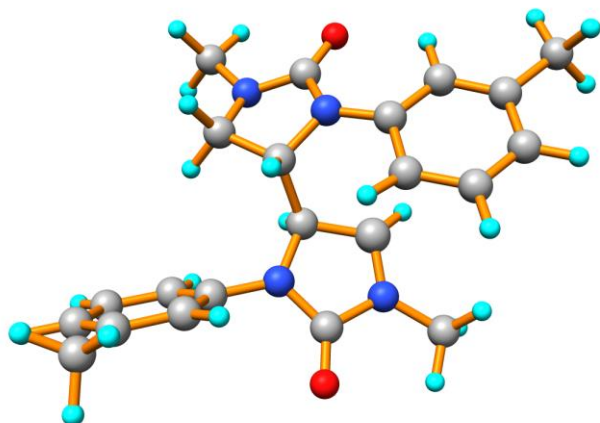

Energy = -1221.655617 Hartree

Imag. Freq. = -223.4549 cm<sup>-1</sup>

| 53 |    |       |    |         |
|----|----|-------|----|---------|
| C  |    |       |    | 1       |
| O  |    | 1     |    | 1.192   |
| N  | 1  | 1.359 | 2  | 130.394 |
| N  | 1  | 1.422 | 2  | 124.279 |
| C  | 4  | 1.322 | 1  | 111.389 |
| C  | 3  | 1.436 | 1  | 112.433 |
| H  | 6  | 1.096 | 3  | 112.243 |
| H  | 5  | 1.077 | 4  | 119.934 |
| C  | 3  | 1.421 | 1  | 122.729 |
| C  | 9  | 1.382 | 3  | 119.221 |
| C  | 9  | 1.384 | 3  | 119.677 |
| C  | 10 | 1.387 | 9  | 120.375 |
| H  | 10 | 1.079 | 9  | 119.380 |
| C  | 11 | 1.382 | 9  | 118.758 |
| H  | 11 | 1.080 | 9  | 120.518 |
| C  | 14 | 1.382 | 11 | 120.254 |
| H  | 14 | 1.078 | 11 | 119.790 |
| H  | 16 | 1.079 | 14 | 119.525 |
| C  | 4  | 1.440 | 1  | 121.172 |
| H  | 19 | 1.086 | 4  | 110.142 |
| H  | 19 | 1.083 | 4  | 107.063 |
| H  | 19 | 1.085 | 4  | 110.269 |
| C  | 7  | 3.224 | 6  | 82.222  |
| O  | 23 | 1.200 | 7  | 136.195 |
| N  | 23 | 1.412 | 7  | 62.538  |
| N  | 23 | 1.352 | 7  | 65.179  |
| C  | 26 | 1.434 | 23 | 112.068 |
| C  | 25 | 1.433 | 23 | 110.613 |
| H  | 28 | 1.086 | 25 | 112.278 |
| H  | 27 | 1.091 | 26 | 111.599 |
| C  | 25 | 1.367 | 23 | 126.313 |
| C  | 31 | 1.395 | 25 | 123.450 |
| C  | 31 | 1.415 | 25 | 116.399 |
| C  | 32 | 1.379 | 31 | 120.188 |
| H  | 32 | 1.075 | 31 | 119.247 |
| C  | 33 | 1.411 | 31 | 118.812 |
| C  | 36 | 1.362 | 33 | 120.656 |
| H  | 36 | 1.079 | 33 | 118.799 |
| H  | 37 | 1.079 | 36 | 120.411 |
| C  | 26 | 1.437 | 23 | 121.005 |
| H  | 40 | 1.089 | 26 | 111.169 |
| H  | 40 | 1.083 | 26 | 107.839 |
| H  | 40 | 1.086 | 26 | 110.256 |
| H  | 27 | 1.086 | 26 | 112.007 |
| H  | 33 | 1.080 | 31 | 119.974 |
| C  | 34 | 1.490 | 32 | 120.398 |
| H  | 46 | 1.088 | 34 | 110.722 |
| H  | 46 | 1.084 | 34 | 111.808 |
| H  | 46 | 1.088 | 34 | 110.253 |
| C  | 12 | 1.494 | 10 | 120.810 |
| H  | 50 | 1.088 | 12 | 110.417 |
| H  | 50 | 1.085 | 12 | 111.624 |
| H  | 50 | 1.086 | 12 | 111.334 |

Molecule: SSS-I22-Me

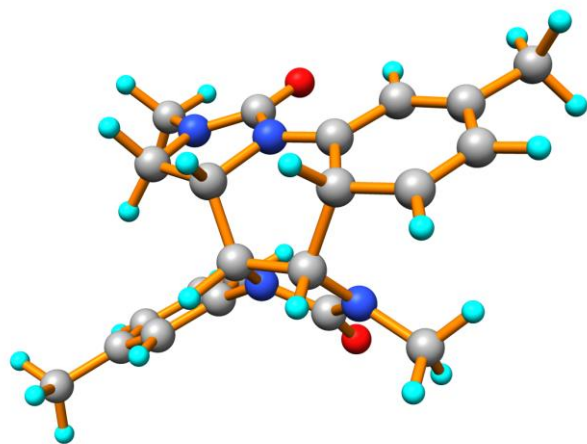

Energy = -1221.670394 Hartree

| 53 |    |       |    |         |
|----|----|-------|----|---------|
| C  |    |       |    | 1       |
| O  |    | 1     |    | 1.197   |
| N  | 1  | 1.384 | 2  | 126.492 |
| N  | 1  | 1.374 | 2  | 126.017 |
| C  | 4  | 1.421 | 1  | 112.588 |
| C  | 3  | 1.434 | 1  | 111.936 |
| H  | 6  | 1.090 | 3  | 112.646 |
| H  | 5  | 1.090 | 4  | 111.602 |
| C  | 3  | 1.419 | 1  | 119.689 |
| C  | 9  | 1.382 | 3  | 118.715 |
| C  | 9  | 1.387 | 3  | 120.817 |
| C  | 10 | 1.384 | 9  | 118.998 |
| H  | 10 | 1.078 | 9  | 119.622 |
| C  | 11 | 1.386 | 9  | 120.785 |
| H  | 11 | 1.081 | 9  | 120.218 |
| C  | 12 | 1.381 | 10 | 120.571 |
| H  | 12 | 1.079 | 10 | 119.537 |
| H  | 16 | 1.080 | 12 | 119.799 |
| C  | 4  | 1.438 | 1  | 119.794 |
| H  | 19 | 1.085 | 4  | 111.977 |
| H  | 19 | 1.090 | 4  | 110.927 |
| H  | 19 | 1.084 | 4  | 106.887 |
| C  | 3  | 3.325 | 1  | 114.364 |
| O  | 23 | 1.198 | 3  | 125.232 |
| N  | 23 | 1.436 | 3  | 58.741  |
| N  | 23 | 1.334 | 3  | 78.343  |
| C  | 26 | 1.435 | 23 | 114.782 |
| C  | 25 | 1.444 | 23 | 111.272 |
| H  | 28 | 1.089 | 25 | 109.976 |
| H  | 27 | 1.089 | 26 | 110.756 |
| C  | 25 | 1.322 | 23 | 127.049 |
| C  | 31 | 1.398 | 25 | 124.851 |
| C  | 31 | 1.482 | 25 | 113.371 |
| C  | 32 | 1.368 | 31 | 119.269 |
| H  | 32 | 1.075 | 31 | 119.485 |
| C  | 33 | 1.473 | 31 | 114.769 |
| C  | 36 | 1.334 | 33 | 121.728 |
| H  | 36 | 1.080 | 33 | 117.171 |
| H  | 37 | 1.079 | 36 | 120.806 |
| C  | 26 | 1.437 | 23 | 122.382 |
| H  | 40 | 1.087 | 26 | 110.536 |
| H  | 40 | 1.083 | 26 | 107.944 |
| H  | 40 | 1.087 | 26 | 109.783 |
| H  | 27 | 1.086 | 26 | 110.833 |
| H  | 33 | 1.096 | 31 | 107.921 |
| C  | 34 | 1.481 | 32 | 120.669 |
| H  | 46 | 1.089 | 34 | 109.962 |
| H  | 46 | 1.089 | 34 | 109.841 |
| H  | 46 | 1.083 | 34 | 112.323 |
| C  | 14 | 1.495 | 11 | 120.951 |
| H  | 50 | 1.087 | 14 | 111.283 |
| H  | 50 | 1.088 | 14 | 110.676 |
| H  | 50 | 1.086 | 14 | 111.691 |

Molecule: **SSS-TS22-Me**

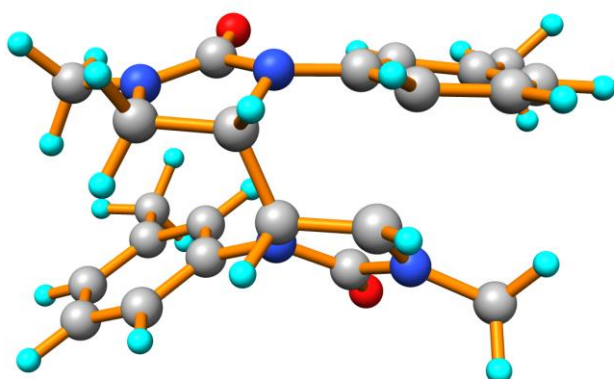

Energy = -1221.655563 Hartree

Imag. Freq. = -250.5242 cm<sup>-1</sup>

53

|   |    |       |    |         |
|---|----|-------|----|---------|
| C |    |       |    | 1       |
| O |    |       | 1  | 1.191   |
| N | 1  | 1.366 | 2  | 129.995 |
| N | 1  | 1.417 | 2  | 124.031 |
| C | 4  | 1.322 | 1  | 110.984 |
| C | 3  | 1.437 | 1  | 111.903 |
| H | 6  | 1.095 | 3  | 112.348 |
| H | 5  | 1.077 | 4  | 119.955 |
| C | 3  | 1.424 | 1  | 120.008 |
| C | 9  | 1.382 | 3  | 118.563 |
| C | 9  | 1.384 | 3  | 120.301 |
| C | 10 | 1.388 | 9  | 120.387 |
| H | 10 | 1.079 | 9  | 119.256 |
| C | 11 | 1.383 | 9  | 118.730 |
| H | 11 | 1.080 | 9  | 120.895 |
| C | 14 | 1.383 | 11 | 120.337 |
| H | 14 | 1.078 | 11 | 119.672 |
| H | 16 | 1.079 | 14 | 119.585 |
| C | 4  | 1.444 | 1  | 120.928 |
| H | 19 | 1.082 | 4  | 109.784 |
| H | 19 | 1.086 | 4  | 110.218 |
| H | 19 | 1.083 | 4  | 107.448 |
| C | 13 | 3.109 | 10 | 91.702  |
| O | 23 | 1.203 | 13 | 71.536  |
| N | 23 | 1.414 | 13 | 104.772 |
| N | 23 | 1.343 | 13 | 97.504  |
| C | 26 | 1.429 | 23 | 113.688 |
| C | 25 | 1.435 | 23 | 109.880 |
| H | 28 | 1.087 | 25 | 112.846 |
| H | 27 | 1.090 | 26 | 111.601 |
| C | 25 | 1.370 | 23 | 125.054 |
| C | 31 | 1.393 | 25 | 124.223 |
| C | 31 | 1.414 | 25 | 115.790 |
| C | 32 | 1.380 | 31 | 119.904 |
| H | 32 | 1.075 | 31 | 119.430 |
| C | 33 | 1.411 | 31 | 119.205 |
| C | 36 | 1.360 | 33 | 120.105 |
| H | 36 | 1.079 | 33 | 119.137 |
| H | 37 | 1.079 | 36 | 120.531 |
| C | 26 | 1.433 | 23 | 122.863 |
| H | 40 | 1.087 | 26 | 110.957 |
| H | 40 | 1.084 | 26 | 107.702 |
| H | 40 | 1.088 | 26 | 109.927 |
| H | 27 | 1.088 | 26 | 111.073 |
| H | 33 | 1.080 | 31 | 118.230 |
| C | 34 | 1.489 | 32 | 120.337 |
| H | 46 | 1.087 | 34 | 110.521 |
| H | 46 | 1.089 | 34 | 110.437 |
| H | 46 | 1.084 | 34 | 111.769 |
| C | 12 | 1.494 | 10 | 120.355 |
| H | 50 | 1.088 | 12 | 110.464 |
| H | 50 | 1.085 | 12 | 111.409 |
| H | 50 | 1.086 | 12 | 111.338 |



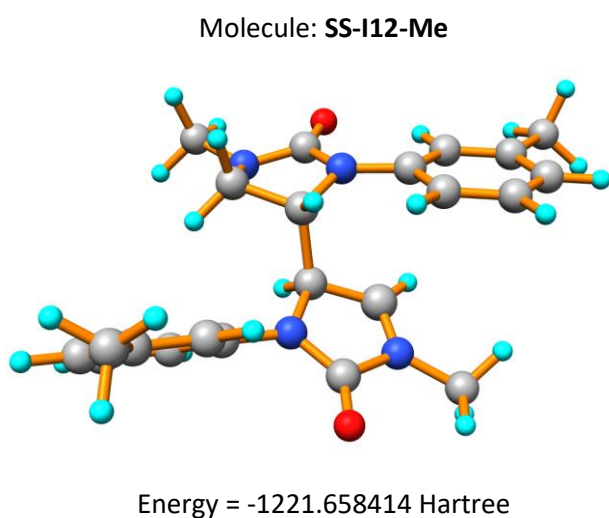

53

|   |    |       |    |         |
|---|----|-------|----|---------|
| C |    |       |    | 1       |
| O |    | 1     |    | 1.188   |
| N | 1  | 1.348 | 2  | 132.485 |
| N | 1  | 1.454 | 2  | 122.872 |
| N | 3  | 180.1 |    |         |
| C | 4  | 1.285 | 1  | 110.871 |
| C | 3  | 1.437 | 1  | 112.517 |
| H | 6  | 1.095 | 3  | 112.672 |
| H | 5  | 1.077 | 4  | 123.042 |
| C | 3  | 1.423 | 1  | 122.796 |
| C | 9  | 1.382 | 3  | 119.334 |
| C | 9  | 1.383 | 3  | 119.237 |
| C | 10 | 1.387 | 9  | 120.175 |
| H | 10 | 1.079 | 9  | 119.631 |
| C | 11 | 1.382 | 9  | 118.542 |
| H | 11 | 1.080 | 9  | 120.660 |
| C | 14 | 1.382 | 11 | 120.281 |
| H | 14 | 1.078 | 11 | 119.739 |
| H | 16 | 1.079 | 14 | 119.487 |
| C | 4  | 1.447 | 1  | 120.745 |
| H | 19 | 1.084 | 4  | 108.987 |
| H | 19 | 1.083 | 4  | 106.933 |
| H | 19 | 1.084 | 4  | 109.934 |
| C | 7  | 3.054 | 6  | 87.646  |
| O | 23 | 1.201 | 7  | 134.545 |
| N | 23 | 1.401 | 7  | 66.061  |
| N | 23 | 1.364 | 7  | 63.368  |
| C | 26 | 1.433 | 23 | 110.462 |
| C | 25 | 1.429 | 23 | 109.997 |
| H | 28 | 1.084 | 25 | 113.503 |
| H | 27 | 1.092 | 26 | 111.992 |
| C | 25 | 1.395 | 23 | 126.552 |
| C | 31 | 1.395 | 25 | 122.074 |
| C | 31 | 1.396 | 25 | 118.508 |
| C | 32 | 1.384 | 31 | 120.607 |
| H | 32 | 1.075 | 31 | 119.272 |
| C | 33 | 1.389 | 31 | 119.774 |
| C | 36 | 1.375 | 33 | 120.597 |
| H | 36 | 1.079 | 33 | 119.178 |
| H | 37 | 1.079 | 36 | 120.159 |
| C | 26 | 1.438 | 23 | 120.033 |
| H | 40 | 1.089 | 26 | 111.454 |
| H | 40 | 1.083 | 26 | 107.819 |
| H | 40 | 1.085 | 26 | 110.148 |
| H | 27 | 1.085 | 26 | 112.192 |
| H | 33 | 1.078 | 31 | 121.215 |
| C | 34 | 1.493 | 32 | 120.200 |
| H | 46 | 1.086 | 34 | 111.333 |
| H | 46 | 1.085 | 34 | 111.625 |
| H | 46 | 1.088 | 34 | 110.193 |
| C | 12 | 1.494 | 10 | 120.817 |
| H | 50 | 1.086 | 12 | 111.292 |
| H | 50 | 1.088 | 12 | 110.411 |
| H | 50 | 1.085 | 12 | 111.640 |

Molecule: SS-TS12-Me

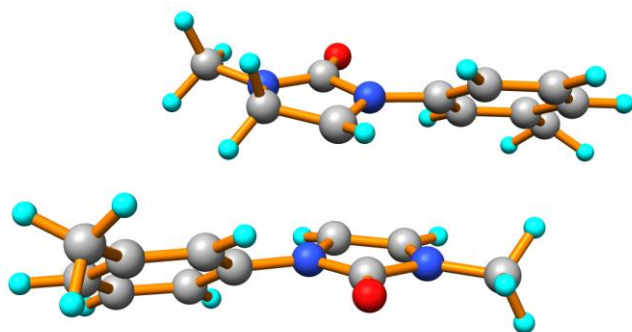

Energy = -1221.637583 Hartree

Imag. Freq. = -227.1069  $\text{cm}^{-1}$

| 53 |    |       |    |         |
|----|----|-------|----|---------|
| C  |    |       |    | 1       |
| O  |    | 1     |    | 1.193   |
| N  | 1  | 1.443 | 2  | 124.667 |
| N  | 1  | 1.346 | 2  | 130.125 |
| C  | 3  | 1.320 | 1  | 110.589 |
| H  | 5  | 1.079 | 3  | 121.656 |
| C  | 3  | 1.414 | 1  | 124.380 |
| C  | 7  | 1.386 | 3  | 120.056 |
| C  | 7  | 1.386 | 3  | 118.515 |
| C  | 8  | 1.388 | 7  | 119.832 |
| H  | 8  | 1.077 | 7  | 119.947 |
| C  | 9  | 1.382 | 7  | 118.695 |
| H  | 9  | 1.079 | 7  | 120.863 |
| C  | 12 | 1.382 | 9  | 120.275 |
| H  | 12 | 1.078 | 9  | 119.660 |
| H  | 14 | 1.079 | 12 | 119.566 |
| C  | 4  | 1.439 | 1  | 122.231 |
| H  | 17 | 1.083 | 4  | 107.620 |
| H  | 17 | 1.086 | 4  | 110.350 |
| H  | 17 | 1.087 | 4  | 110.987 |
| C  | 4  | 1.430 | 1  | 112.278 |
| H  | 21 | 1.095 | 4  | 112.072 |
| C  | 6  | 2.749 | 5  | 118.360 |
| O  | 23 | 1.200 | 6  | 122.412 |
| N  | 23 | 1.378 | 6  | 67.782  |
| N  | 23 | 1.400 | 6  | 72.798  |
| C  | 25 | 1.389 | 23 | 109.704 |
| C  | 25 | 1.416 | 23 | 124.841 |
| C  | 28 | 1.385 | 25 | 119.950 |
| C  | 28 | 1.386 | 25 | 119.112 |
| C  | 29 | 1.387 | 28 | 120.139 |
| H  | 29 | 1.077 | 28 | 119.689 |
| C  | 30 | 1.383 | 28 | 118.838 |
| H  | 30 | 1.079 | 28 | 120.887 |
| C  | 33 | 1.381 | 30 | 120.476 |
| H  | 33 | 1.078 | 30 | 119.501 |
| H  | 35 | 1.079 | 33 | 119.721 |
| C  | 26 | 1.443 | 23 | 121.523 |
| H  | 38 | 1.085 | 26 | 110.551 |
| H  | 38 | 1.085 | 26 | 109.961 |
| H  | 38 | 1.083 | 26 | 106.957 |
| C  | 26 | 1.340 | 23 | 110.556 |
| H  | 42 | 1.074 | 26 | 122.649 |
| H  | 21 | 1.087 | 4  | 113.212 |
| H  | 27 | 1.074 | 25 | 122.007 |
| C  | 10 | 1.494 | 8  | 120.530 |
| H  | 46 | 1.085 | 10 | 111.633 |
| H  | 46 | 1.088 | 10 | 110.266 |
| H  | 46 | 1.086 | 10 | 111.367 |
| C  | 31 | 1.494 | 29 | 120.425 |
| H  | 50 | 1.088 | 31 | 110.344 |
| H  | 50 | 1.085 | 31 | 111.619 |
| H  | 50 | 1.086 | 31 | 111.385 |

## 2D NMR data

All 2D NMR experiments were performed on a Bruker AVANCE-500 spectrometer. The spectrometer was equipped with a z-gradient inverse probe head capable of producing gradients with the strength of  $50 \text{ G cm}^{-1}$ . All experiments were carried out at  $303 \pm 0.2 \text{ K}$ . The NMR signals were assigned on the basis of COSY, NOESY,  $^1\text{H}$ - $^{13}\text{C}$  HSQC,  $^1\text{H}$ - $^{13}\text{C}$  HMBC and  $^1\text{H}$ - $^{15}\text{N}$  HSQC,  $^1\text{H}$ - $^{15}\text{N}$  HMBC experiments.

### The structure assignment for the octahydro-diimidazoquinolines **2**

The structure of the compounds **endo-2a** and **exo-2a** was confirmed by heteronuclear correlation experiments. The signals of protons, carbon and nitrogen atoms were assigned used the set of 2D homo- and heteronuclear correlation experiments. In the  $^1\text{H}$ - $^{15}\text{N}$  HMBC spectrum the cross-peak is observed between the  $\text{H}^{18/22}$  protons of the phenyl fragment and  $\text{N}^3$  nitrogen atom (Figure S1, **endo-2a** is given as an example). Also, there are cross-peaks between  $\text{N}^3$  nitrogen atom and  $\text{H}^5$  proton of the methyne group and  $\text{H}^7$  proton of the second aromatic ring. Additionally, the cross-peaks between  $\text{N}^3$  nitrogen atom and  $\text{H}^{13}$  proton of the methyne group, as well as the  $\text{N}^{12}$  nitrogen atom and the same  $\text{H}^{13}$  proton are present. The combination of this data, as well as  $^1\text{H}$ - $^{13}\text{C}$  HMBC data indicates the presence of three heterocyclic rings fused with benzene moiety.

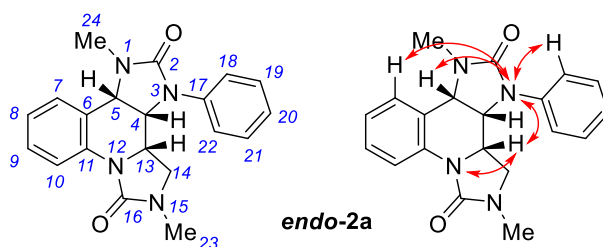

**Figure S1** The atom numbering for the compound **endo-2a** and the key cross-peaks in the  $^1\text{H}$ - $^{15}\text{N}$  HMBC spectrum

The relative configuration of the *endo*-diastereomer was determined based on the spin-spin coupling constants (Figure S2). For the *exo*-diastereomer  $J_{\text{HH}}(\text{H}^4, \text{H}^5) = 6.8 \text{ Hz}$  and  $J_{\text{HH}}(\text{H}^4, \text{H}^{13}) = 9.9 \text{ Hz}$ , whereas for the *endo*-diastereomer  $J_{\text{HH}}(\text{H}^4, \text{H}^5) = 9.5 \text{ Hz}$  and  $J_{\text{HH}}(\text{H}^4, \text{H}^{13}) = 4.3 \text{ Hz}$ . According to the Karplus rule, the coupling constant for the vicinal protons in *trans*-configuration is bigger than for protons in *cis*-configuration. Thus, the relative configuration of the  $\text{H}^5$ - $\text{H}^4$ - $\text{H}^{13}$  protons is *cis-cis-cis* for the *endo*-diastereomer and *cis-cis-trans* for the *exo*-diastereomer. Additionally, a NOE between  $\text{H}^4$  and  $\text{H}^{13}$  atoms is two times higher for the *endo*-diastereomer than for its *exo*-counterpart, which also supports the above configuration assignment.

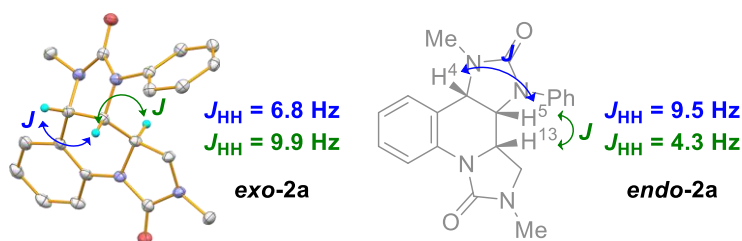

**Figure S2** The H-H coupling constants for the compounds **endo-2a** and **exo-2a**

The structures and relative configurations of the compounds **endo-2b**, **endo-2m**, **endo-2o** and **exo-2g** were established similarly using 2D NMR data and the data obtained from the analysis of the compounds **endo-2a** and **exo-2a**. Additionally, the 2D experiments were carried out for the compound **exo-2j** to further check the correctness of the assignments, which were in the agreement with the x-ray data.

For the compound **exo-2g**, two regioisomers are possible, namely, **exo-2g** and **exo-2g'**, which differ in the position of the methyl group in aromatic fragment (Figure S3). Thus, the exact position of the methyl group in the aromatic ring was additionally established by 2D correlation experiments. In the  $^1\text{H}$ - $^{13}\text{C}$  HMBC spectrum

the cross-peak between H<sup>5</sup> proton of the methyne group (4.545 ppm, d, *J* = 6.8 Hz) and C<sup>7</sup> carbon atom (131.3 ppm) of the aromatic ring is present. According to the <sup>1</sup>H-<sup>13</sup>C HSQC spectrum, the C<sup>7</sup> carbon atom is attached to the H<sup>7</sup> proton (7.346 ppm, d, *J* = 7.8 Hz). In turn, the cross-peak between the H<sup>7</sup> and substituted C<sup>9</sup> carbon atom (138.4 ppm) is also observed in the <sup>1</sup>H-<sup>13</sup>C HMBC spectrum. At the same time, no cross-peak between substituted aromatic carbon atom and H<sup>5</sup> proton is present. All of these suggest the formation of **exo-2g** isomer.

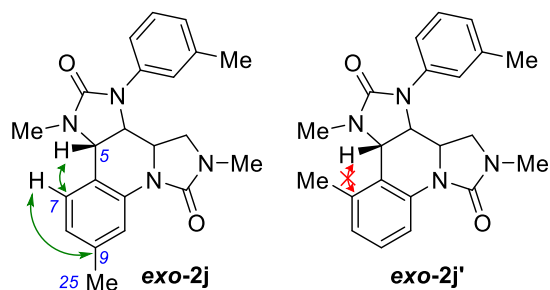

**Figure S3** Two possible regioisomers for the compound **exo-2j** and the key cross-peaks in the <sup>1</sup>H-<sup>13</sup>C HMBC spectrum

### The structure assignment for the 4,4'-bi(imidazole-2-one) **5a**

There are four possible regioisomers for the compound **5a** (Figure S4), so the main question was the determination of the correct substitution pattern for both imidazolinone rings. In the <sup>1</sup>H-<sup>13</sup>C HMBC spectrum, the cross-peak between H<sup>5</sup> proton of the unsaturated imidazolinone ring (7.036 ppm, m) and C<sup>11</sup> carbon atom of the phenyl ring (137.2 ppm) is present. Also, the cross-peak is observed between H<sup>10</sup> proton of the methyne group (4.708 ppm, dd, *J* = 7.8 Hz, *J* = 8.6 Hz) and N<sup>3</sup> nitrogen atom (128.8 ppm) in the <sup>1</sup>H-<sup>15</sup>N HMBC spectrum. Such interactions are impossible for the regioisomers **5a''** and **5a'''**, thus these regioisomers were ruled out. Additionally, the NOESY spectrum indicates the presence of NOE between H<sup>5</sup> and H<sup>12/16</sup> protons of the aromatic ring (7.690 ppm, d, *J* = 7.7 Hz), which also supports the formation of either **5a** or **5a'**. The choice between these regioisomers was made based on the NOESY data. The presence of NOE between H<sup>9</sup> proton of the methylene group (4.092 ppm, dd, *J* = 8.6 Hz, *J* = 9.4 Hz, *trans* to H<sup>10</sup>) and H<sup>18/22</sup> protons of the phenyl moiety (7.577 ppm, d, *J* = 7.3 Hz) indicates their close proximity. At the same time, no NOE was observed between H<sup>10</sup> proton and H<sup>18/22</sup> protons. Thus, the structure **5a** was assigned to the obtained compound.

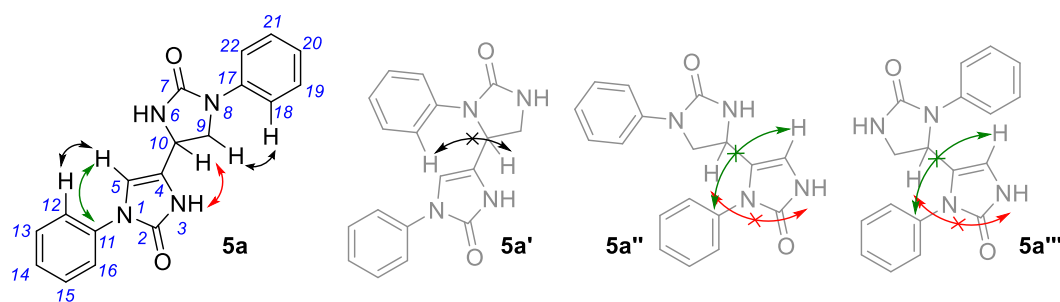

**Figure S4** Possible regioisomers and the key cross-peaks in the <sup>1</sup>H-<sup>13</sup>C HMBC (green), <sup>1</sup>H-<sup>15</sup>N HMBC (red) and NOESY (black) spectra for the compound **5a**

## X-ray data

The X-ray diffraction data for the crystals of **exo-2a**, **endo-2c**, **exo-2n**, **endo-2d** were collected on a Bruker D8 Venture automatic diffractometer using graphite monochromated radiation. The structures were solved by direct methods and refined by full-matrix least-squares using the SHELXL97<sup>[18]</sup> program. All the non-hydrogen atoms were refined with anisotropic atomic displacement parameters. All figures were made using the program OLEX2.<sup>[19]</sup> X-ray diffraction data for the crystals of **3a**, **4**, **exo-2f**, **endo-2h**, **exo-2i**, **exo-2j** were obtained on a Bruker D8 QUEST automated three-circle diffractometer with a PHOTON III area detector and an I $\mu$ S DIAMOND microfocus X-ray tube at a temperature of 100(2) K:  $\lambda(\text{Mo K}\alpha) = 0.71073 \text{ \AA}$ ,  $\omega/\varphi$  scanning mode with a step of  $0.5^\circ$ . Data collection and indexing, determination and refinement of unit cell parameters were carried out using the APEX3 software package. Numerical absorption correction based on the crystal shape, additional spherical absorption correction, and systematic error correction were performed using the SADABS-2016/2 software.<sup>[20]</sup> Using OLEX2,<sup>[19]</sup> structures were solved by direct methods using the SHELXT-2018/3 program<sup>[21]</sup> and refined by full-matrix least-squares on  $F^2$  using the SHELXL-2018/3 program.<sup>[22]</sup> Nonhydrogen atoms were refined anisotropically. The positions of hydrogen atoms of methyl groups were inserted using the rotation of the group with idealized bond angles; the remaining hydrogen atoms were refined using a riding model. Crystallographic data for the structures reported have been deposited with the Cambridge Crystallographic Data Center (2164569, 2164570, 2161404, 2161405, 2161406, 2161407, 2164571, 2164572, 2164573, 2165308).

**Table S2.** Crystallographic data for the compounds **3**, **4**, **exo-2a**, **endo-2c**, **exo-2e**, **endo-2f**, **exo-2i**, **endo-2k**, **exo-2l**

| Compound               | <b>3</b>                                                                                                | <b>4</b>                                                                            | <b>exo-2a</b>                                                                                          | <b>endo-2c</b>                                                                                            | <b>exo-2n</b>                                                                                          |
|------------------------|---------------------------------------------------------------------------------------------------------|-------------------------------------------------------------------------------------|--------------------------------------------------------------------------------------------------------|-----------------------------------------------------------------------------------------------------------|--------------------------------------------------------------------------------------------------------|
| Empirical formula      | C <sub>10</sub> H <sub>10</sub> N <sub>2</sub> O                                                        | C <sub>20</sub> H <sub>20</sub> N <sub>4</sub> O <sub>2</sub> , 2(H <sub>2</sub> O) | C <sub>20</sub> H <sub>20</sub> N <sub>4</sub> O <sub>2</sub>                                          | C <sub>20</sub> H <sub>18</sub> Cl <sub>2</sub> N <sub>4</sub> O <sub>2</sub>                             | C <sub>26</sub> H <sub>32</sub> N <sub>4</sub> O <sub>8</sub>                                          |
| Formula weight         | 174.20                                                                                                  | 384.43                                                                              | 348.40                                                                                                 | 417.28                                                                                                    | 528.55                                                                                                 |
| Radiation, wavelength  | Mo K $\alpha$ , 0.71073 Å                                                                               | Mo K $\alpha$ , 0.71073 Å                                                           | Mo K $\alpha$ , 0.71073 Å                                                                              | Mo K $\alpha$ , 0.71073 Å                                                                                 | Mo K $\alpha$ , 0.71073 Å                                                                              |
| Temperature            | 100(2)                                                                                                  | 100(2)                                                                              | 100(2)                                                                                                 | 150(2)                                                                                                    | 100(2)                                                                                                 |
| Crystal system         | Monoclinic                                                                                              | Orthorhombic                                                                        | Monoclinic                                                                                             | Monoclinic                                                                                                | Monoclinic                                                                                             |
| Space group            | <i>P</i> 2 <sub>1</sub> / <i>c</i> (No. 14)                                                             | <i>P</i> <i>n</i> a2 <sub>1</sub> (No. 33)                                          | <i>P</i> 2 <sub>1</sub> / <i>c</i> (No. 14)                                                            | <i>P</i> 2 <sub>1</sub> / <i>c</i> (No. 14)                                                               | <i>P</i> 2 <sub>1</sub> / <i>n</i> (No. 14)                                                            |
| Unit cell dimensions   | <i>a</i> = 6.3685(3) Å,<br><i>b</i> = 7.0657(3) Å,<br><i>c</i> = 18.9967(10) Å,<br>$\beta$ = 97.181(2)° | <i>a</i> = 12.5996(6) Å,<br><i>b</i> = 7.2670(3) Å,<br><i>c</i> = 42.5196(18) Å     | <i>a</i> = 9.659(3) Å,<br><i>b</i> = 18.266(5) Å,<br><i>c</i> = 10.132(3) Å,<br>$\beta$ = 113.345(10)° | <i>a</i> = 8.8126(4) Å,<br><i>b</i> = 23.7747(9) Å,<br><i>c</i> = 9.4899(4) Å,<br>$\beta$ = 110.6060(10)° | <i>a</i> = 10.678(3) Å,<br><i>b</i> = 9.987(3) Å,<br><i>c</i> = 24.015(7) Å,<br>$\beta$ = 100.609(15)° |
| Volume                 | 848.11(7) Å <sup>3</sup>                                                                                | 3893.1(3) Å <sup>3</sup>                                                            | 1641.4(8) Å <sup>3</sup>                                                                               | 1861.09(14) Å <sup>3</sup>                                                                                | 2517.0(13) Å <sup>3</sup>                                                                              |
| Z and Z'               | 4 and 1                                                                                                 | 8 and 2                                                                             | 4 and 1                                                                                                | 4 and 1                                                                                                   | 4 and 1                                                                                                |
| Calculated density     | 1.364 g cm <sup>-3</sup>                                                                                | 1.312 g cm <sup>-3</sup>                                                            | 1.333 g cm <sup>-3</sup>                                                                               | 1.489 g cm <sup>-3</sup>                                                                                  | 1.395 g cm <sup>-3</sup>                                                                               |
| Absorption coefficient | 0.091 mm <sup>-1</sup>                                                                                  | 0.093 mm <sup>-1</sup>                                                              | 0.094 mm <sup>-1</sup>                                                                                 | 0.374 mm <sup>-1</sup>                                                                                    | 0.104 mm <sup>-1</sup>                                                                                 |

| Compound                                            | <b>3</b>                                                        | <b>4</b>                                                          | <i>exo-2a</i>                                                       | <i>endo-2c</i>                                                      | <i>exo-2n</i>                                                       |
|-----------------------------------------------------|-----------------------------------------------------------------|-------------------------------------------------------------------|---------------------------------------------------------------------|---------------------------------------------------------------------|---------------------------------------------------------------------|
| <i>F</i> (000)                                      | 368                                                             | 1632                                                              | 736                                                                 | 864                                                                 | 1120                                                                |
| Crystal size                                        | 0.464 x 0.284 x 0.162 mm <sup>3</sup>                           | 0.590 x 0.473 x 0.194 mm <sup>3</sup>                             | 0.08 x 0.06 x 0.01 mm <sup>3</sup>                                  | 0.15 x 0.13 x 0.11 mm <sup>3</sup>                                  | 0.08 x 0.07 x 0.02 mm <sup>3</sup>                                  |
| θ range for data collection                         | 2.161° to 26.991°                                               | 1.916° to 27.000°                                                 | 2.296° to 25.999°                                                   | 2.448° to 28.998°                                                   | 1.973° to 24.998°                                                   |
| Index ranges                                        | -8 ≤ <i>h</i> ≤ 8,<br>-9 ≤ <i>k</i> ≤ 9,<br>-24 ≤ <i>l</i> ≤ 24 | -16 ≤ <i>h</i> ≤ 16,<br>-9 ≤ <i>k</i> ≤ 9,<br>-54 ≤ <i>l</i> ≤ 54 | -11 ≤ <i>h</i> ≤ 11,<br>-22 ≤ <i>k</i> ≤ 20,<br>-12 ≤ <i>l</i> ≤ 12 | -12 ≤ <i>h</i> ≤ 12,<br>-32 ≤ <i>k</i> ≤ 31,<br>-12 ≤ <i>l</i> ≤ 12 | -12 ≤ <i>h</i> ≤ 11,<br>-11 ≤ <i>k</i> ≤ 11,<br>-28 ≤ <i>l</i> ≤ 28 |
| Reflections collected                               | 22245                                                           | 44052                                                             | 11447                                                               | 19811                                                               | 13122                                                               |
| Independent reflections                             | 1842                                                            | 8472                                                              | 3235                                                                | 4938                                                                | 4418                                                                |
| <i>R</i> <sub>int</sub>                             | 0.0437                                                          | 0.0695                                                            | 0.0814                                                              | 0.0302                                                              | 0.1967                                                              |
| <i>R</i> σ                                          | 0.0209                                                          | 0.0537                                                            | 0.0884                                                              | 0.0279                                                              | 0.3270                                                              |
| Observed Data [ <i>I</i> > 2σ( <i>I</i> )]          | 1663                                                            | 7806                                                              | 2043                                                                | 4271                                                                | 1343                                                                |
| Completeness to θ = 25.242°                         | 99.7                                                            | 99.9                                                              | 99.9                                                                | 99.8                                                                | 99.9                                                                |
| Max. and min. transmission                          | 0.7460 and 0.6721                                               | 0.7460 and 0.5304                                                 | 0.7461 and 0.6166                                                   | 0.7461 and 0.6724                                                   | 0.7461 and 0.5484                                                   |
| Data / restraints / parameters                      | 1842 / 0 / 119                                                  | 8472 / 1 / 521                                                    | 3235 / 0 / 237                                                      | 4938 / 0 / 255                                                      | 4418 / 0 / 352                                                      |
| Goodness-of-fit on <i>F</i> <sup>2</sup>            | 1.111                                                           | 1.098                                                             | 1.014                                                               | 1.077                                                               | 0.954                                                               |
| Final <i>R</i> indices [ <i>I</i> > 2σ( <i>I</i> )] | <i>R</i> 1 = 0.0498, <i>wR</i> 2 = 0.1247                       | <i>R</i> 1 = 0.0565, <i>wR</i> 2 = 0.1406                         | <i>R</i> 1 = 0.0509, <i>wR</i> 2 = 0.1009                           | <i>R</i> 1 = 0.0398, <i>wR</i> 2 = 0.0900                           | <i>R</i> 1 = 0.0968, <i>wR</i> 2 = 0.2035                           |
| <i>R</i> indices (all data)                         | <i>R</i> 1 = 0.0541, <i>wR</i> 2 = 0.1272                       | <i>R</i> 1 = 0.0615, <i>wR</i> 2 = 0.1443                         | <i>R</i> 1 = 0.0997, <i>wR</i> 2 = 0.1230                           | <i>R</i> 1 = 0.0476, <i>wR</i> 2 = 0.0943                           | <i>R</i> 1 = 0.2888, <i>wR</i> 2 = 0.2804                           |
| Flack parameter                                     | –                                                               | 0.2(5)                                                            | –                                                                   | –                                                                   | –                                                                   |
| Largest diff. peak and hole                         | 0.323 and -0.264 e Å <sup>-3</sup>                              | 0.563 and -0.248 e Å <sup>-3</sup>                                | 0.258 and -0.303 e Å <sup>-3</sup>                                  | 0.367 and -0.308 e Å <sup>-3</sup>                                  | 0.579 and -0.308 e Å <sup>-3</sup>                                  |
| CCDC number                                         | 2164569                                                         | 2164570                                                           | 2161404                                                             | 2161405                                                             | 2161406                                                             |

| Compound                           | <i>endo-2d</i>                                                                                                                                                  | <i>exo-2f</i>                                                                                                                                                      | <i>endo-2h</i>                                                                                | <i>exo-2i</i>                                                                                                                                                  | <i>exo-2j</i>                                                                                                                                                    |
|------------------------------------|-----------------------------------------------------------------------------------------------------------------------------------------------------------------|--------------------------------------------------------------------------------------------------------------------------------------------------------------------|-----------------------------------------------------------------------------------------------|----------------------------------------------------------------------------------------------------------------------------------------------------------------|------------------------------------------------------------------------------------------------------------------------------------------------------------------|
| Empirical formula                  | C <sub>22</sub> H <sub>24</sub> N <sub>4</sub> O <sub>4</sub>                                                                                                   | C <sub>20</sub> H <sub>18</sub> Cl <sub>2</sub> N <sub>4</sub> O <sub>2</sub>                                                                                      | C <sub>20</sub> H <sub>18</sub> Br <sub>2</sub> N <sub>4</sub> O <sub>2</sub>                 | C <sub>28</sub> H <sub>24</sub> N <sub>4</sub> O <sub>2</sub>                                                                                                  | C <sub>32</sub> H <sub>26</sub> Br <sub>2</sub> N <sub>4</sub> O <sub>2</sub>                                                                                    |
| Formula weight                     | 408.45                                                                                                                                                          | 417.28                                                                                                                                                             | 506.20                                                                                        | 448.51                                                                                                                                                         | 658.39                                                                                                                                                           |
| Radiation, wavelength              | Mo K $\alpha$ , 0.71073 Å                                                                                                                                       | Mo K $\alpha$ , 0.71073 Å                                                                                                                                          | Mo K $\alpha$ , 0.71073 Å                                                                     | Mo K $\alpha$ , 0.71073 Å                                                                                                                                      | Mo K $\alpha$ , 0.71073 Å                                                                                                                                        |
| Temperature                        | 100(2)                                                                                                                                                          | 100(2)                                                                                                                                                             | 100(2)                                                                                        | 100(2)                                                                                                                                                         | 100(2)                                                                                                                                                           |
| Crystal system                     | Triclinic                                                                                                                                                       | Triclinic                                                                                                                                                          | Monoclinic                                                                                    | Triclinic                                                                                                                                                      | Triclinic                                                                                                                                                        |
| Space group                        | $P\bar{1}$ (No. 2)                                                                                                                                              | $P\bar{1}$ (No. 2)                                                                                                                                                 | $P2_1/n$ (No. 14)                                                                             | $P\bar{1}$ (No. 2)                                                                                                                                             | $P\bar{1}$ (No. 2)                                                                                                                                               |
| Unit cell dimensions               | $a = 9.7783(9)$ Å,<br>$b = 11.9953(10)$ Å,<br>$c = 17.4364(15)$ Å,<br>$\alpha = 81.427(3)^\circ$ ,<br>$\beta = 83.627(4)^\circ$ ,<br>$\gamma = 70.331(3)^\circ$ | $a = 10.8202(9)$ Å,<br>$b = 12.3589(10)$ Å,<br>$c = 15.5997(14)$ Å,<br>$\alpha = 92.661(3)^\circ$ ,<br>$\beta = 109.964(3)^\circ$ ,<br>$\gamma = 107.892(3)^\circ$ | $a = 14.616(3)$ Å,<br>$b = 9.5381(15)$ Å,<br>$c = 15.044(2)$ Å,<br>$\beta = 117.626(5)^\circ$ | $a = 9.118(4)$ Å,<br>$b = 10.799(4)$ Å,<br>$c = 10.873(5)$ Å,<br>$\alpha = 90.043(14)^\circ$ ,<br>$\beta = 100.093(12)^\circ$ ,<br>$\gamma = 95.192(12)^\circ$ | $a = 9.6635(7)$ Å,<br>$b = 11.4629(8)$ Å,<br>$c = 14.1743(10)$ Å,<br>$\alpha = 91.874(2)^\circ$ ,<br>$\beta = 106.844(2)^\circ$ ,<br>$\gamma = 112.114(2)^\circ$ |
| Volume                             | 1900.3(3) Å <sup>3</sup>                                                                                                                                        | 1839.0(3) Å <sup>3</sup>                                                                                                                                           | 1858.2(5) Å <sup>3</sup>                                                                      | 1049.5(8) Å <sup>3</sup>                                                                                                                                       | 1374.29(17) Å <sup>3</sup>                                                                                                                                       |
| Z and Z'                           | 4 and 2                                                                                                                                                         | 12 and 2                                                                                                                                                           | 4 and 1                                                                                       | 2 and 1                                                                                                                                                        | 2 and 1                                                                                                                                                          |
| Calculated density                 | 1.428 g cm <sup>-3</sup>                                                                                                                                        | 1.507 g cm <sup>-3</sup>                                                                                                                                           | 1.809 g cm <sup>-3</sup>                                                                      | 1.419 g cm <sup>-3</sup>                                                                                                                                       | 1.591 g cm <sup>-3</sup>                                                                                                                                         |
| Absorption coefficient             | 0.100 mm <sup>-1</sup>                                                                                                                                          | 0.379 mm <sup>-1</sup>                                                                                                                                             | 4.388 mm <sup>-1</sup>                                                                        | 0.092 mm <sup>-1</sup>                                                                                                                                         | 2.987 mm <sup>-1</sup>                                                                                                                                           |
| $F(000)$                           | 864                                                                                                                                                             | 864                                                                                                                                                                | 1008                                                                                          | 472                                                                                                                                                            | 664                                                                                                                                                              |
| Crystal size                       | 0.12 x 0.11 x 0.1 mm <sup>3</sup>                                                                                                                               | 0.361 x 0.288 x 0.156 mm <sup>3</sup>                                                                                                                              | 0.371 x 0.306 x 0.130 mm <sup>3</sup>                                                         | 0.445 x 0.381 x 0.262 mm <sup>3</sup>                                                                                                                          | 0.283 x 0.174 x 0.102 mm <sup>3</sup>                                                                                                                            |
| $\theta$ range for data collection | 2.046° to 25.999°                                                                                                                                               | 2.058° to 26.999°                                                                                                                                                  | 2.626° to 26.999°                                                                             | 1.894° to 26.997°                                                                                                                                              | 1.521° to 27.943°                                                                                                                                                |
| Index ranges                       | $-12 \leq h \leq 11$ ,<br>$-13 \leq k \leq 14$ ,<br>$-21 \leq l \leq 21$                                                                                        | $-13 \leq h \leq 13$ ,<br>$-15 \leq k \leq 15$ ,<br>$-19 \leq l \leq 19$                                                                                           | $-18 \leq h \leq 18$ ,<br>$-12 \leq k \leq 12$ ,<br>$-19 \leq l \leq 19$                      | $-11 \leq h \leq 11$ ,<br>$-13 \leq k \leq 13$ ,<br>$-13 \leq l \leq 13$                                                                                       | $-12 \leq h \leq 12$ ,<br>$-15 \leq k \leq 15$ ,<br>$-18 \leq l \leq 18$                                                                                         |
| Reflections collected              | 14765                                                                                                                                                           | 34578                                                                                                                                                              | 53022                                                                                         | 32526                                                                                                                                                          | 37004                                                                                                                                                            |
| Independent reflections            | 7401                                                                                                                                                            | 8012                                                                                                                                                               | 4055                                                                                          | 4584                                                                                                                                                           | 6591                                                                                                                                                             |
| $R_{int}$                          | 0.0493                                                                                                                                                          | 0.0718                                                                                                                                                             | 0.0575                                                                                        | 0.0931                                                                                                                                                         | 0.0884                                                                                                                                                           |
| $R\sigma$                          | 0.0807                                                                                                                                                          | 0.0698                                                                                                                                                             | 0.0242                                                                                        | 0.0571                                                                                                                                                         | 0.0661                                                                                                                                                           |
| Observed Data [ $I > 2\sigma(I)$ ] | 5288                                                                                                                                                            | 5302                                                                                                                                                               | 3519                                                                                          | 3305                                                                                                                                                           | 4984                                                                                                                                                             |

| Compound                                | <i>endo-2d</i>                                | <i>exo-2f</i>                                 | <i>endo-2h</i>                                | <i>exo-2i</i>                                 | <i>exo-2j</i>                                 |
|-----------------------------------------|-----------------------------------------------|-----------------------------------------------|-----------------------------------------------|-----------------------------------------------|-----------------------------------------------|
| Completeness to $\theta = 25.242^\circ$ | 99.1                                          | 100.0                                         | 100.0                                         | 100.0                                         | 100.0                                         |
| Max. and min. transmission              | 0.7461 and 0.5450                             | 0.7460 and 0.6775                             | 0.7460 and 0.5824                             | 0.7460 and 0.5828                             | 0.7456 and 0.4725                             |
| Data / restraints / parameters          | 7401 / 0 / 549                                | 8012 / 0 / 509                                | 4055 / 0 / 255                                | 4584 / 0 / 309                                | 6591 / 0 / 361                                |
| Goodness-of-fit on $F^2$                | 1.030                                         | 1.070                                         | 1.034                                         | 1.029                                         | 0.814                                         |
| Final $R$ indices [ $I > 2\sigma(I)$ ]  | $R1 = 0.0560, wR2 = 0.1241$                   | $R1 = 0.0445, wR2 = 0.0937$                   | $R1 = 0.0250, wR2 = 0.0549$                   | $R1 = 0.0437, wR2 = 0.1021$                   | $R1 = 0.0466, wR2 = 0.1163$                   |
| $R$ indices (all data)                  | $R1 = 0.0850, wR2 = 0.1386$                   | $R1 = 0.0858, wR2 = 0.1059$                   | $R1 = 0.0332, wR2 = 0.0584$                   | $R1 = 0.0702, wR2 = 0.1154$                   | $R1 = 0.0714, wR2 = 0.1344$                   |
| Flack parameter                         | –                                             | –                                             | –                                             | –                                             | –                                             |
| Largest diff. peak and hole             | 0.268 and $-0.334 \text{ e } \text{\AA}^{-3}$ | 0.296 and $-0.316 \text{ e } \text{\AA}^{-3}$ | 0.362 and $-0.357 \text{ e } \text{\AA}^{-3}$ | 0.239 and $-0.261 \text{ e } \text{\AA}^{-3}$ | 1.194 and $-0.894 \text{ e } \text{\AA}^{-3}$ |
| CCDC number                             | 2161407                                       | 2164571                                       | 2164572                                       | 2164573                                       | 2165308                                       |



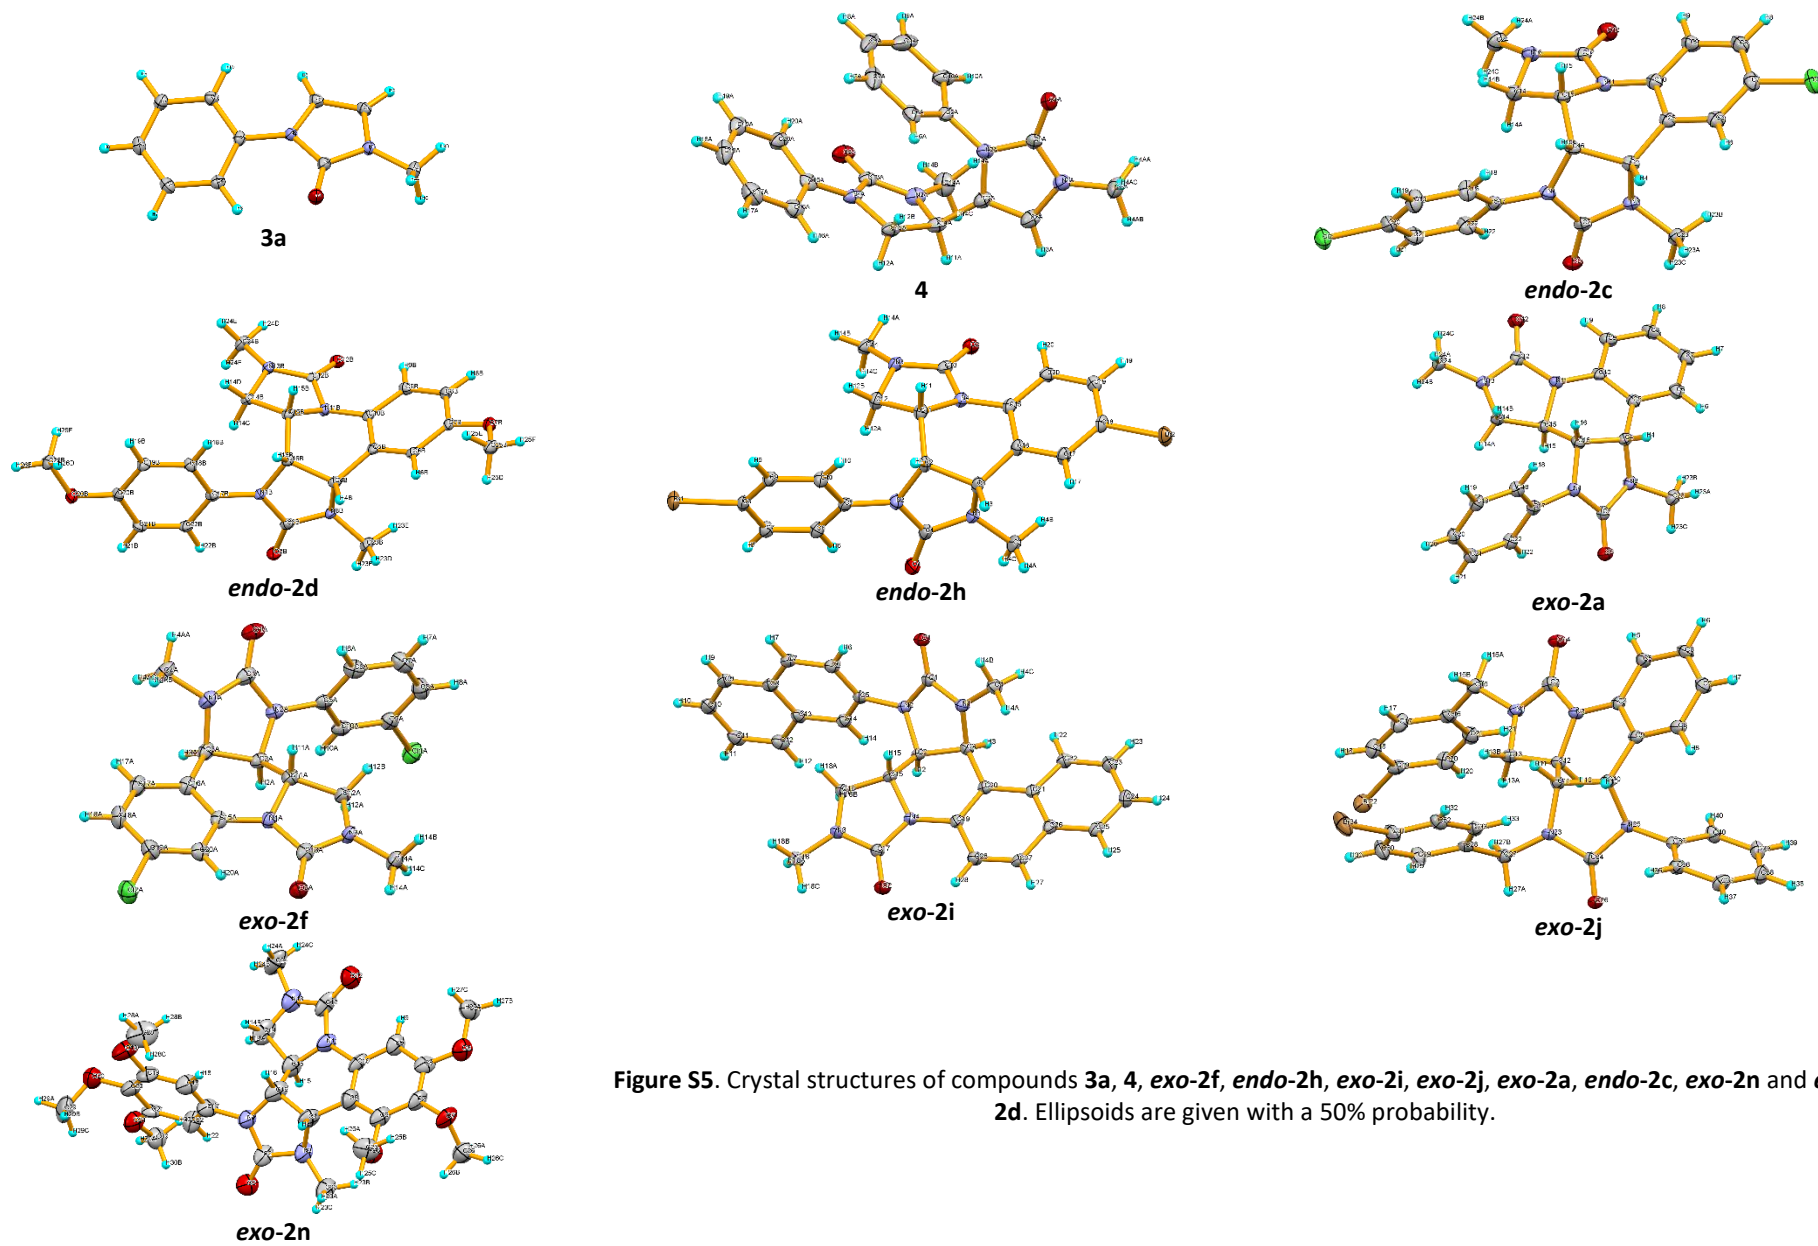

**Figure S5.** Crystal structures of compounds **3a**, **4**, *exo-2f*, *endo-2h*, *exo-2i*, *exo-2j*, *exo-2a*, *endo-2c*, *exo-2n* and *endo-2d*. Ellipsoids are given with a 50% probability.

Copies of NMR spectra

Copies of 2D NMR spectra

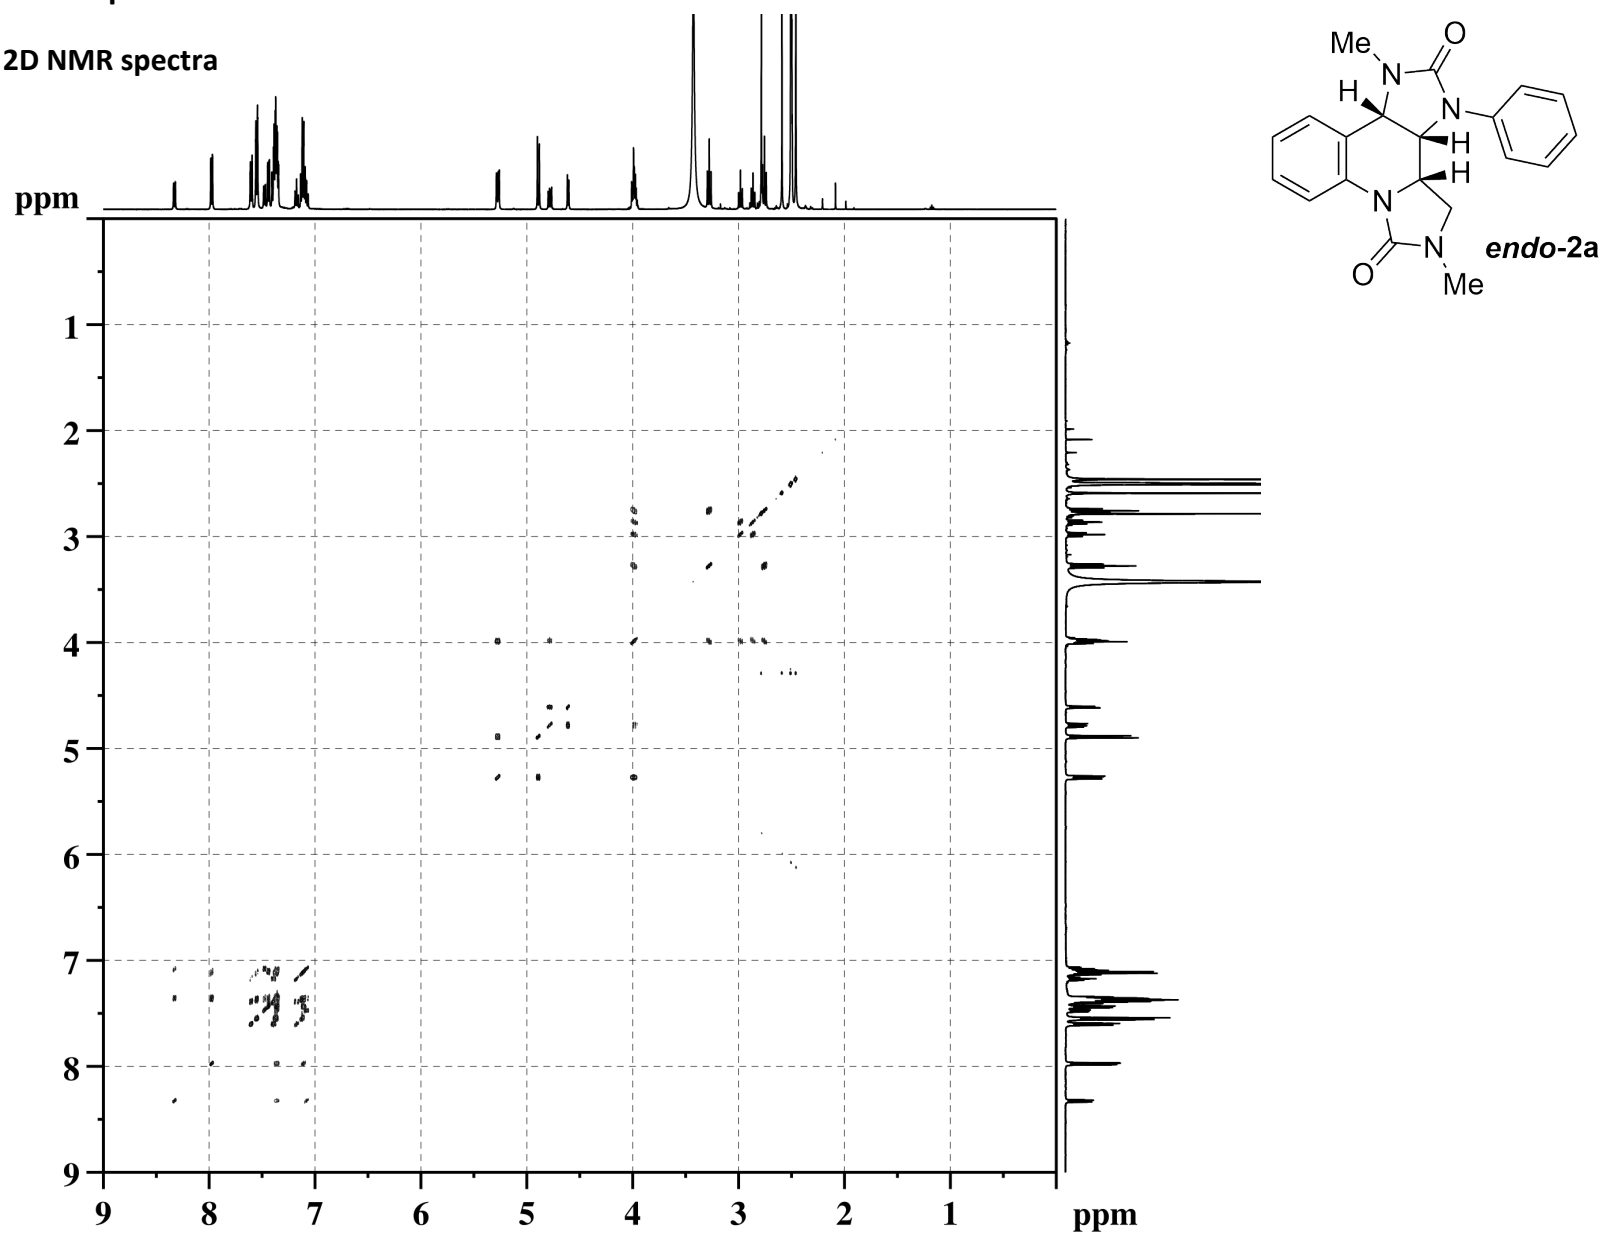

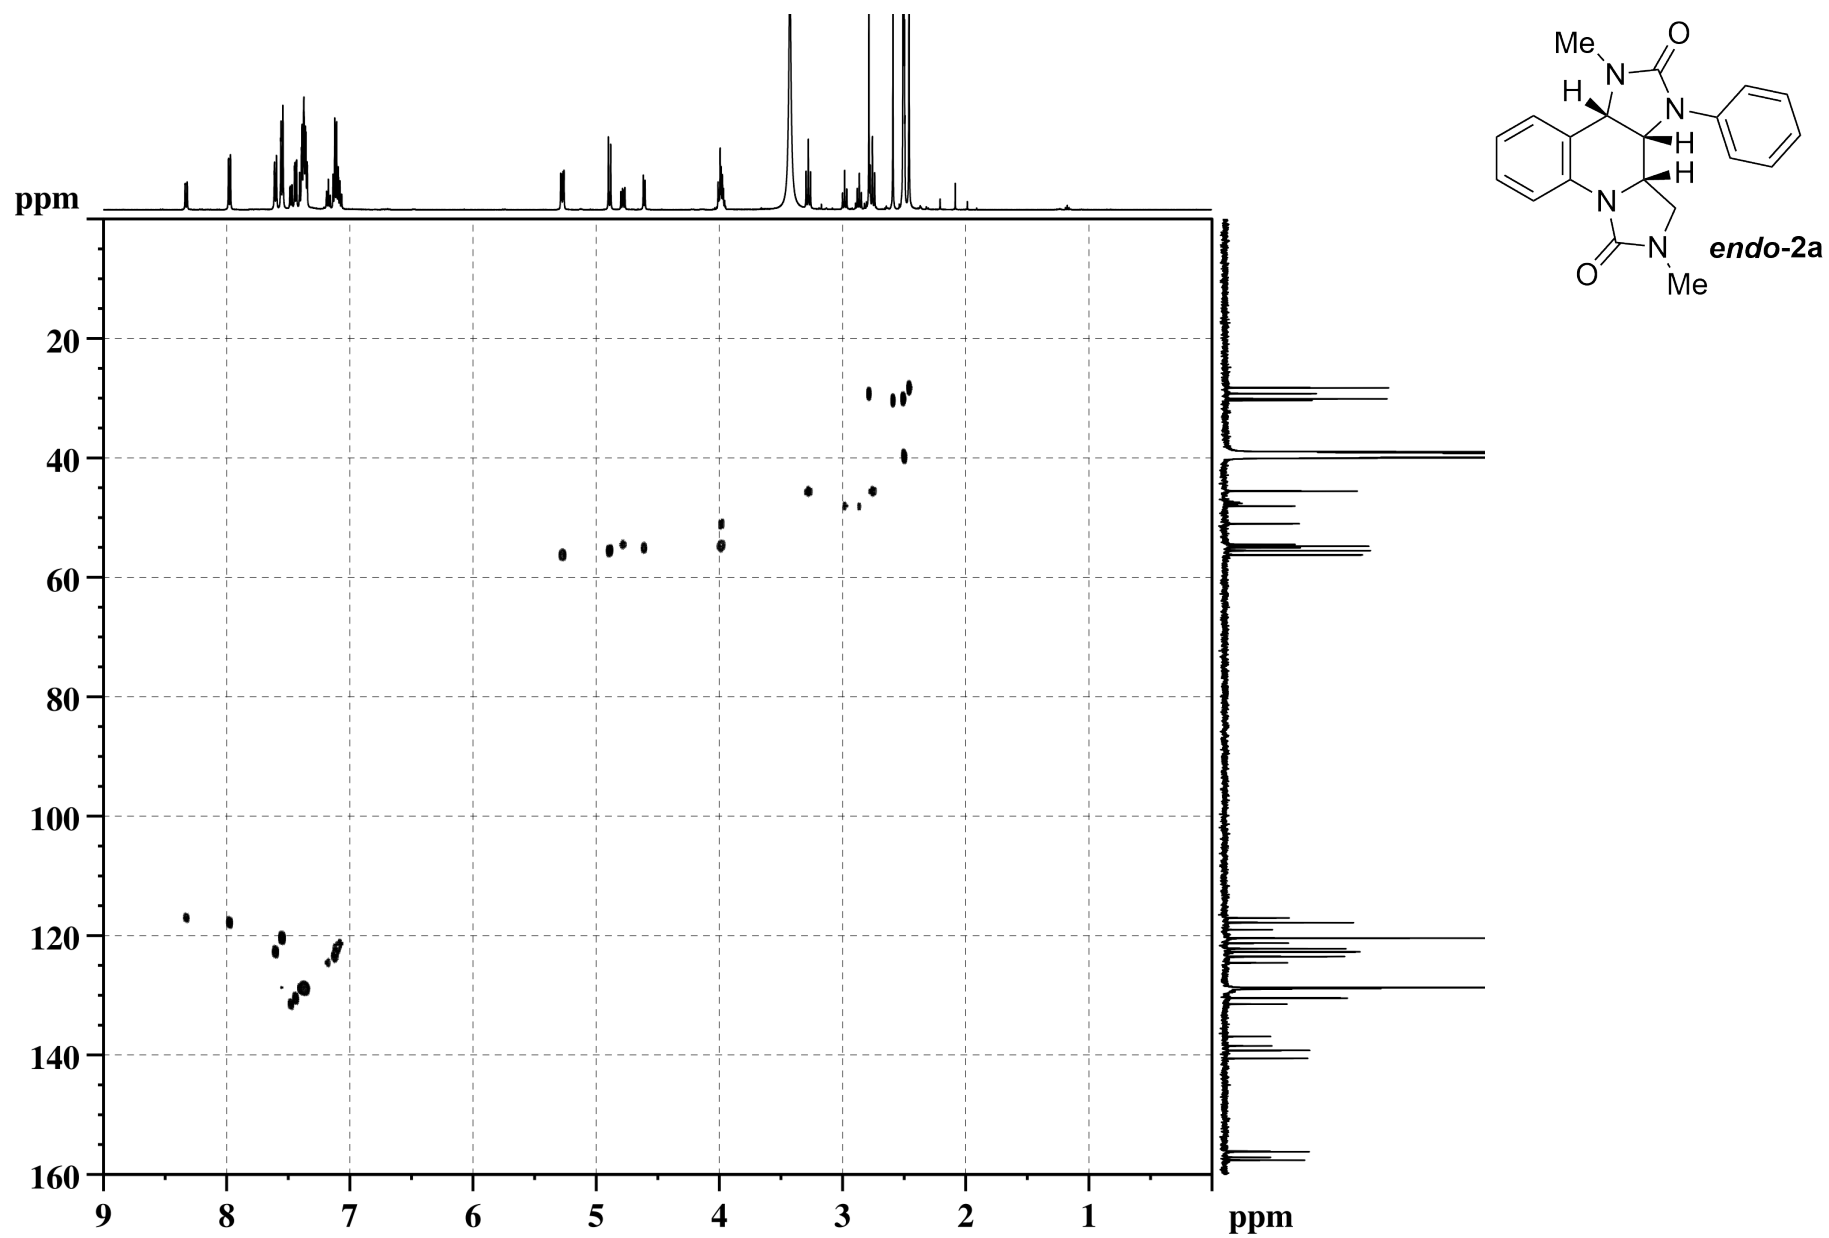

Figure S7.  $^1\text{H}$ - $^{13}\text{C}$  HSQC spectrum ( $(\text{CD}_3)_2\text{SO}$ , 303 K) of the compound *endo-2a*

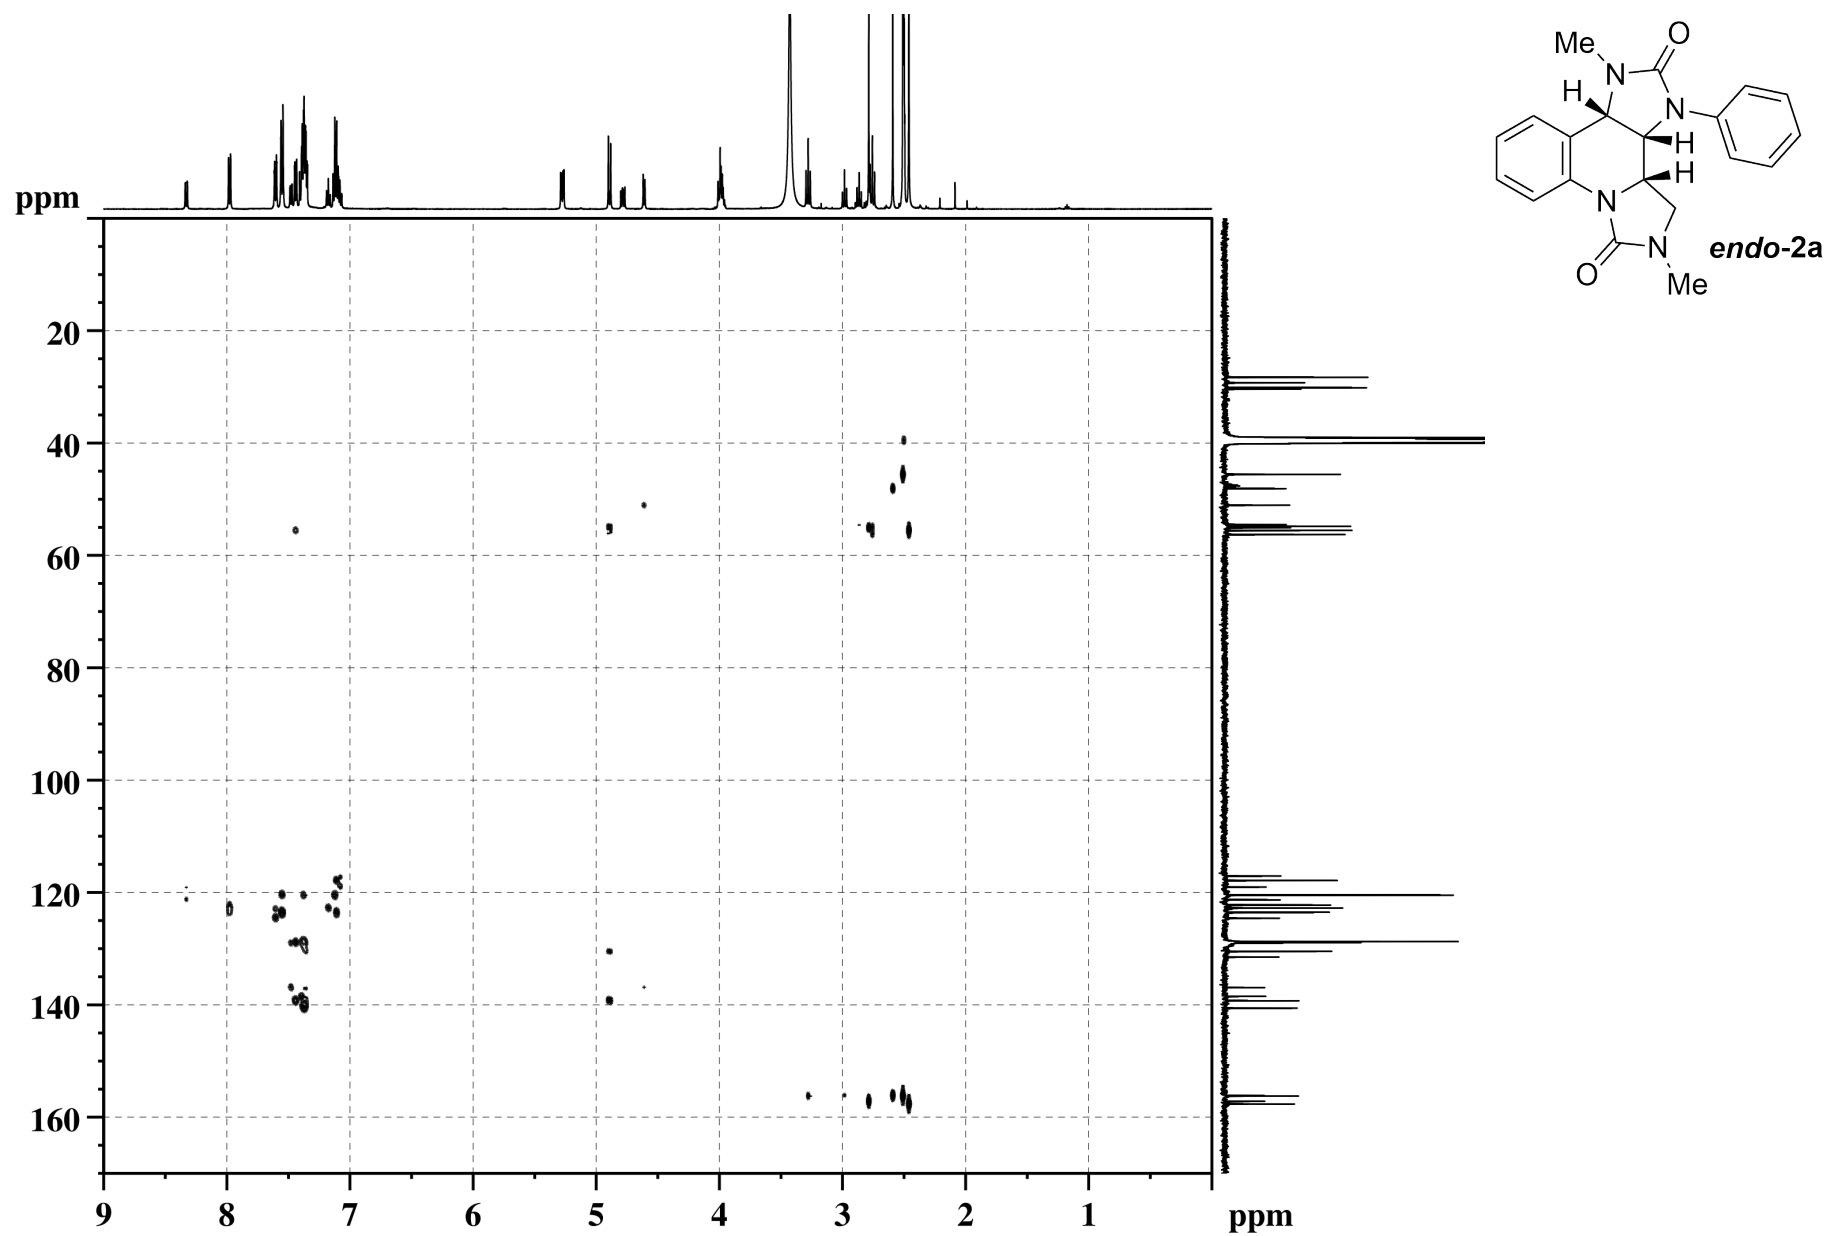

Figure S8.  $^1\text{H}$ - $^{13}\text{C}$  HMBC spectrum ( $(\text{CD}_3)_2\text{SO}$ , 303 K) of the compound *endo-2a*

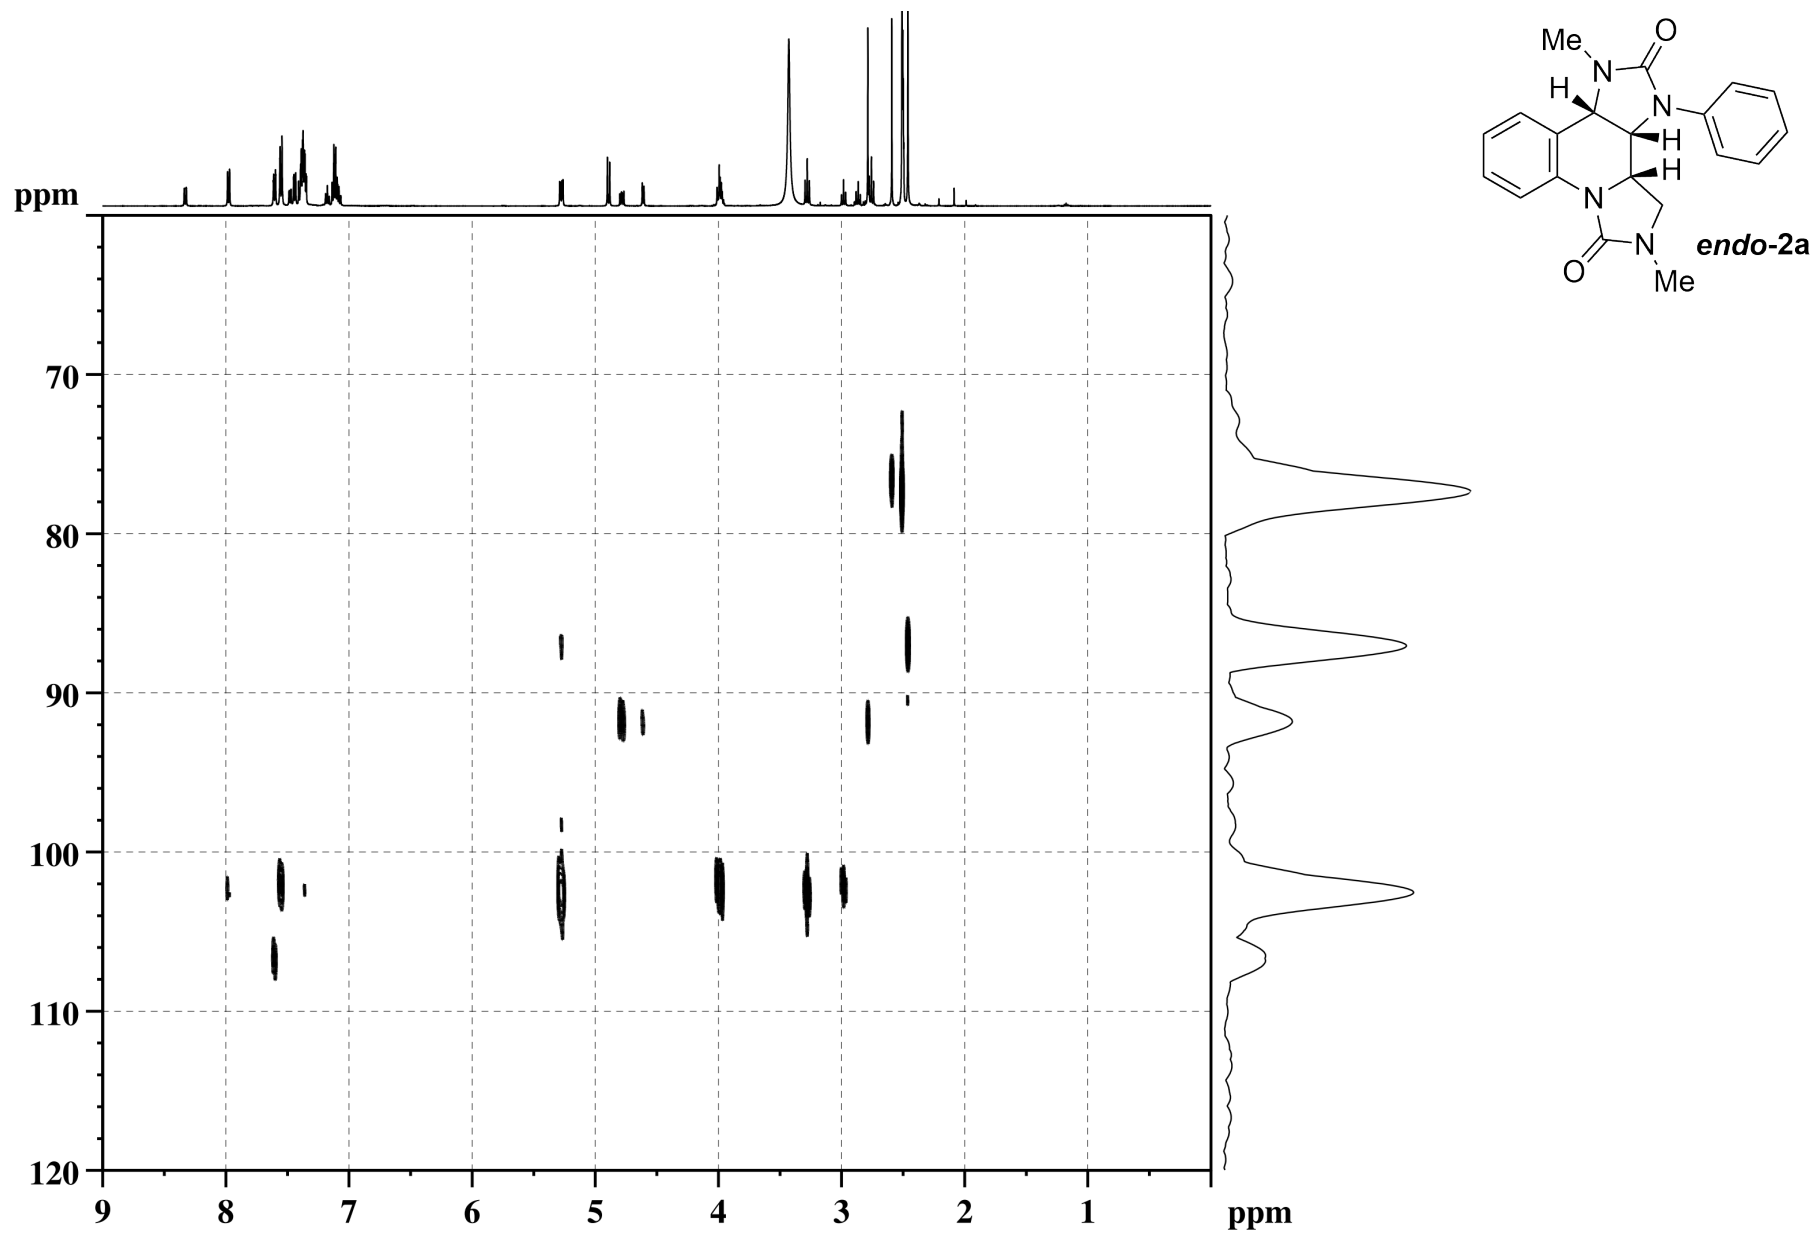

Figure S9.  $^1\text{H}$ - $^{15}\text{N}$  HMBC spectrum ( $(\text{CD}_3)_2\text{SO}$ , 303 K) of the compound *endo-2a*

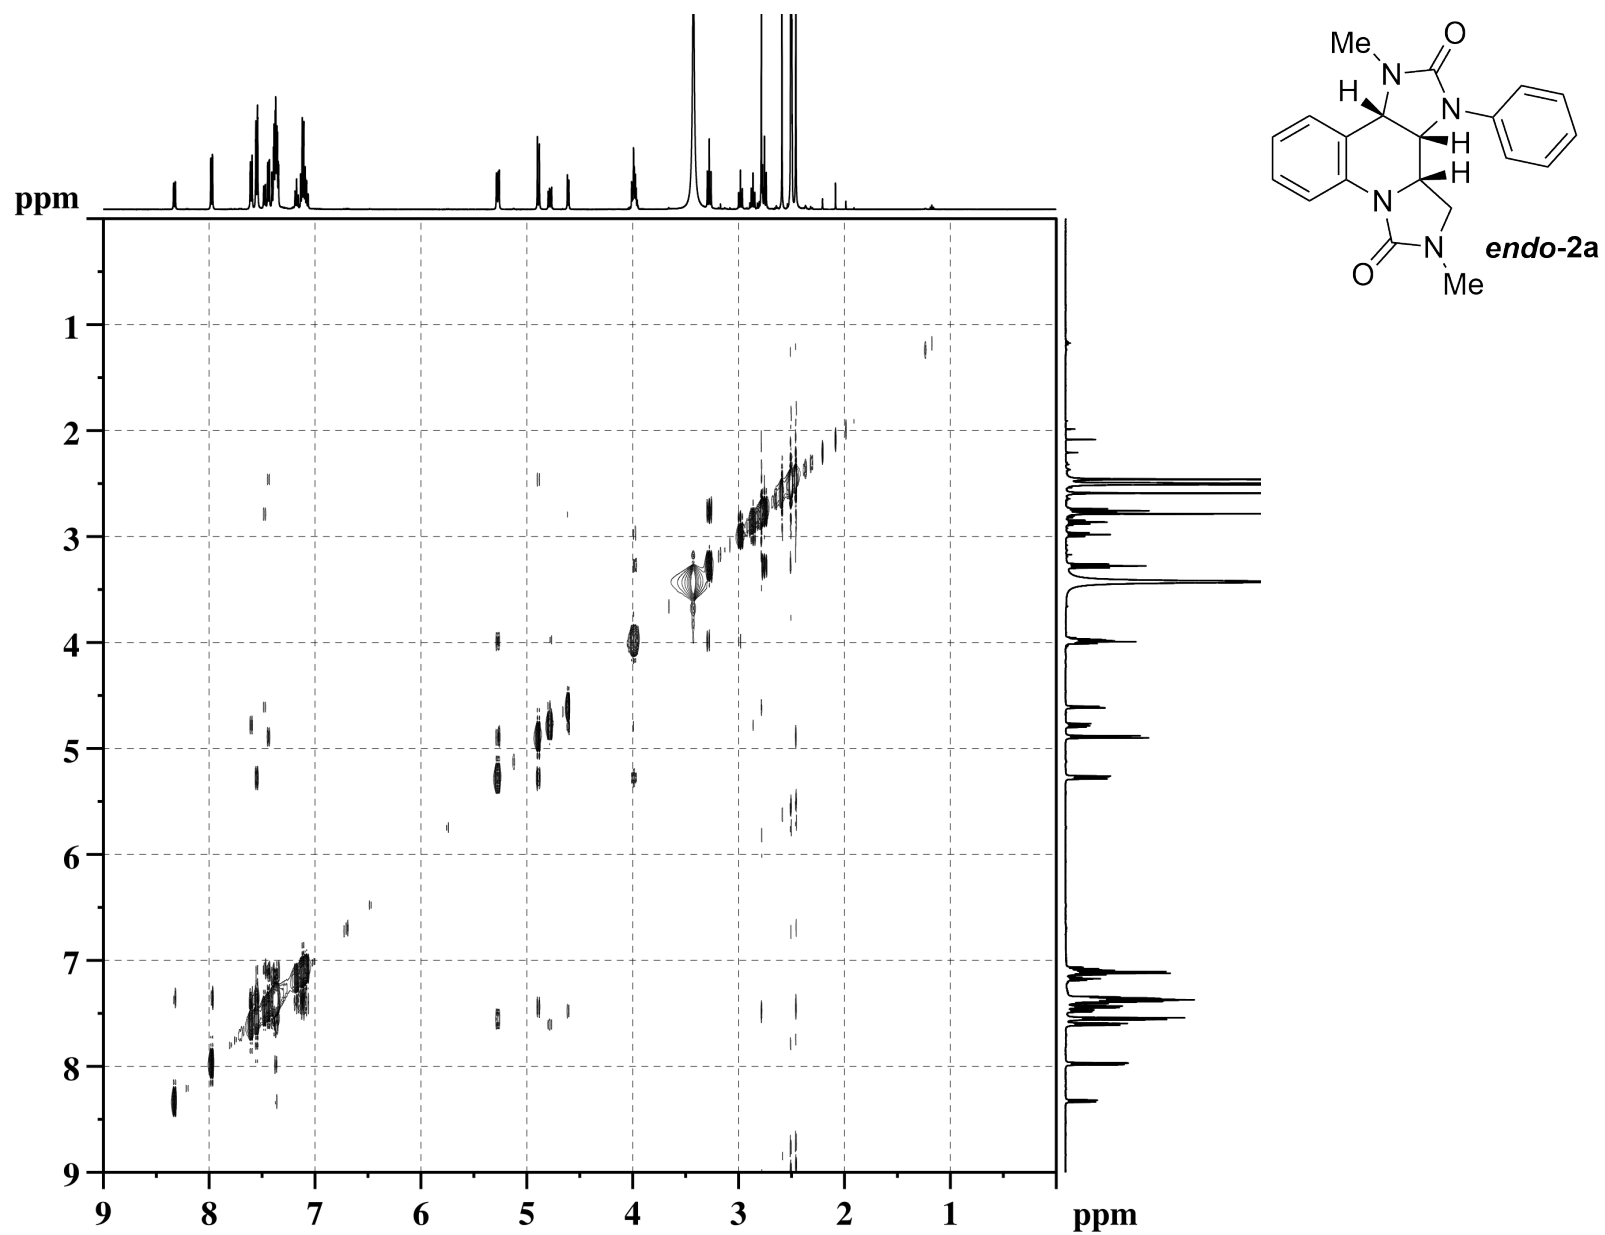

Figure S10. NOESY spectrum ( $(\text{CD}_3)_2\text{SO}$ , 303 K) of the compound *endo-2a*

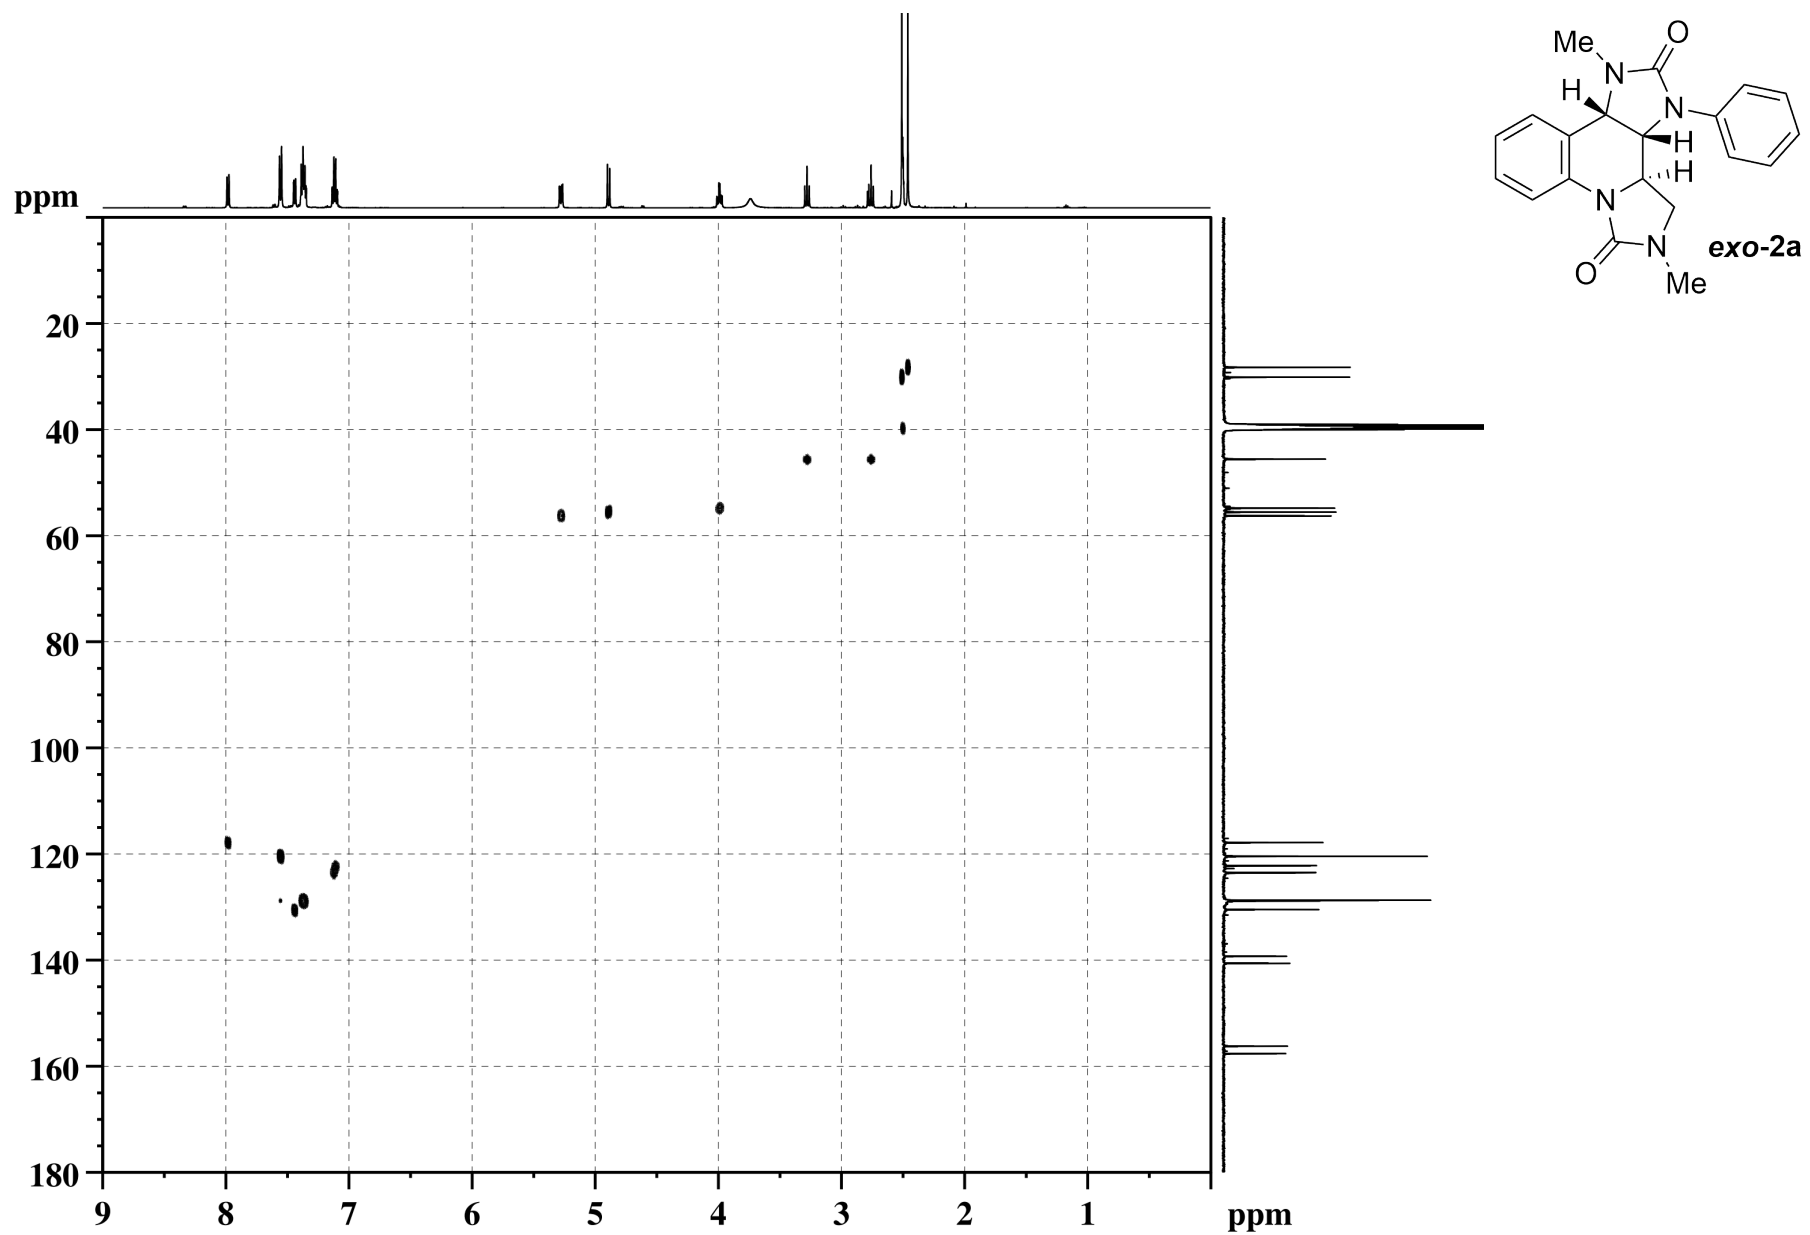

Figure S11.  $^1\text{H}$ - $^{13}\text{C}$  HSQC spectrum ( $(\text{CD}_3)_2\text{SO}$ , 303 K) of the compound *exo-2a*

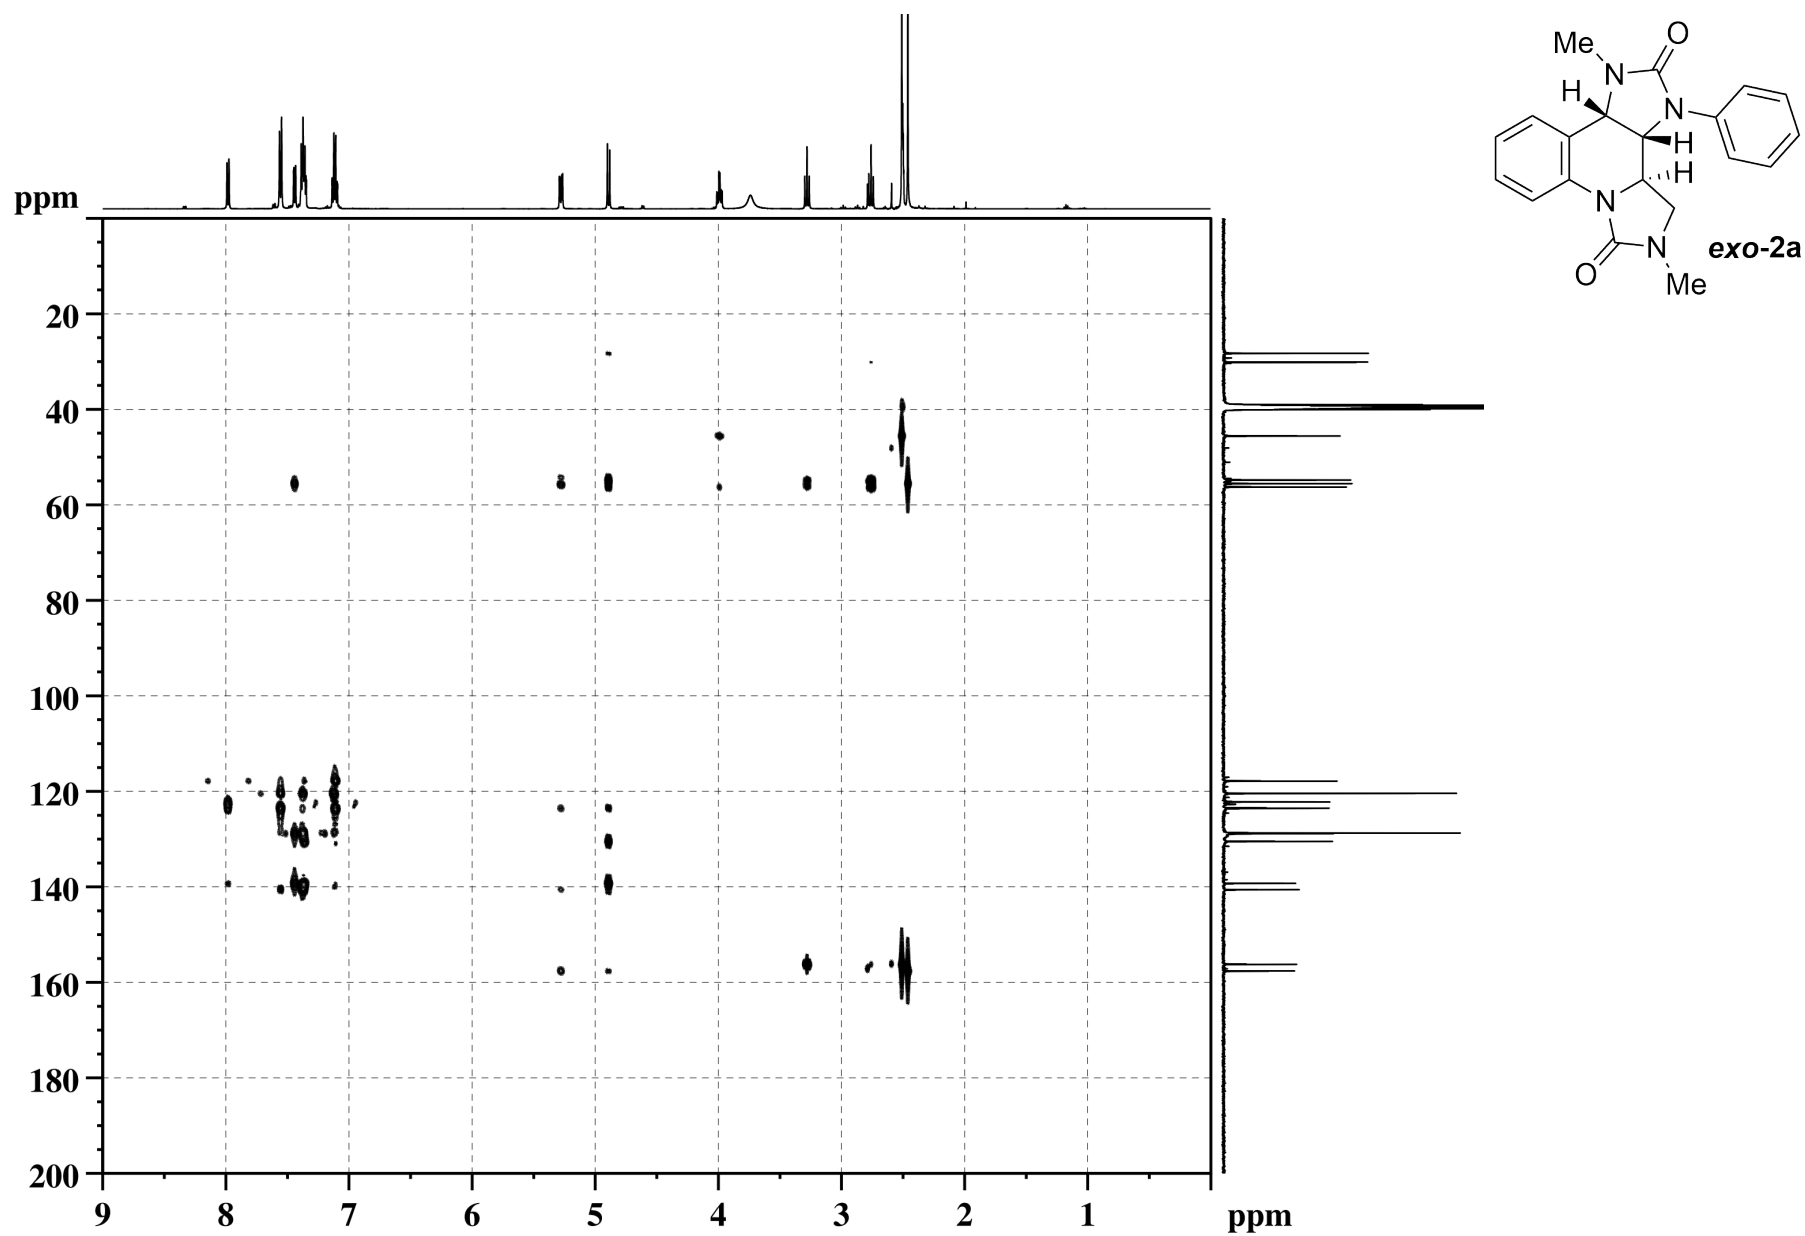

Figure S12.  $^1\text{H}$ - $^{13}\text{C}$  HMBC spectrum ( $(\text{CD}_3)_2\text{SO}$ , 303 K) of the compound *exo-2a*



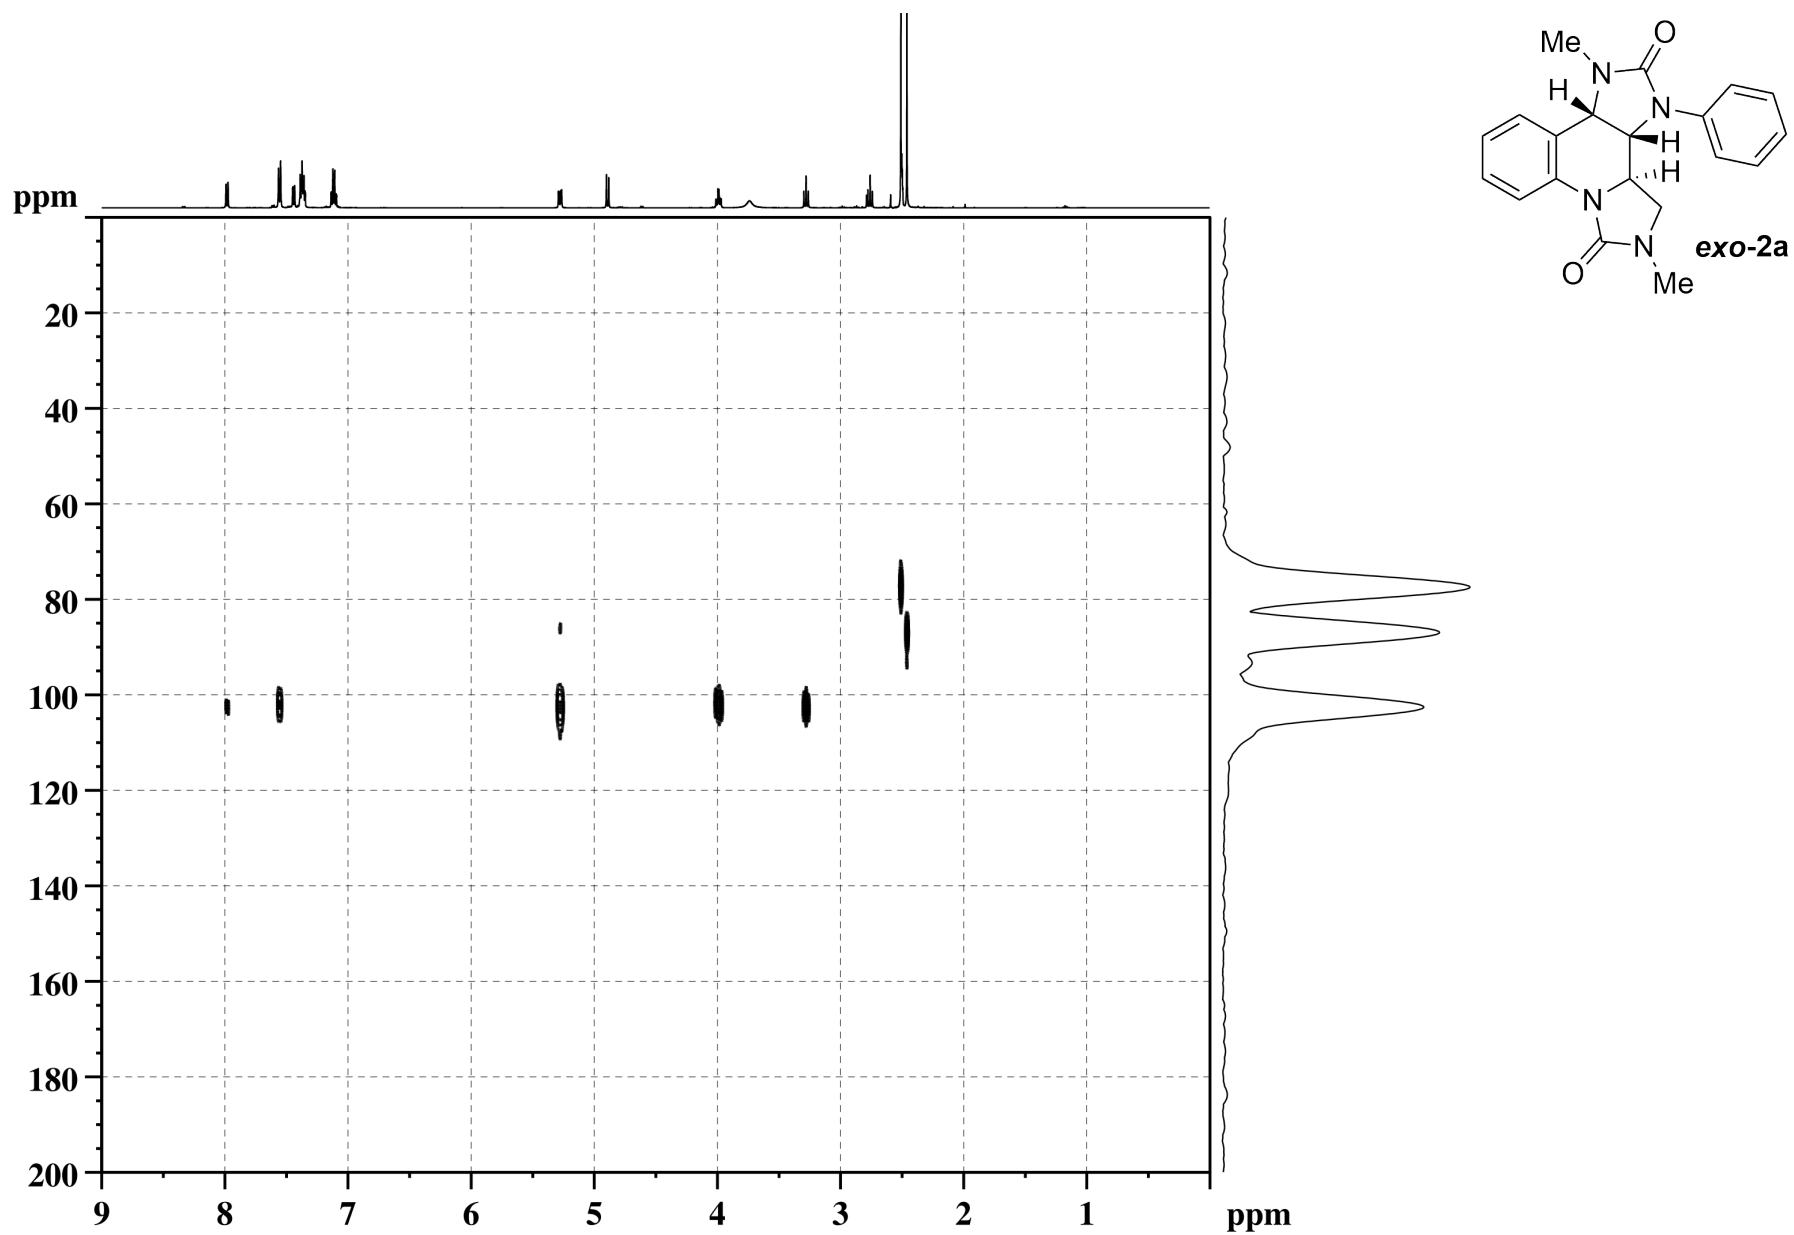

Figure S13.  $^1\text{H}$ - $^{15}\text{N}$  HMBC spectrum ( $(\text{CD}_3)_2\text{SO}$ , 303 K) of the compound **exo-2a**

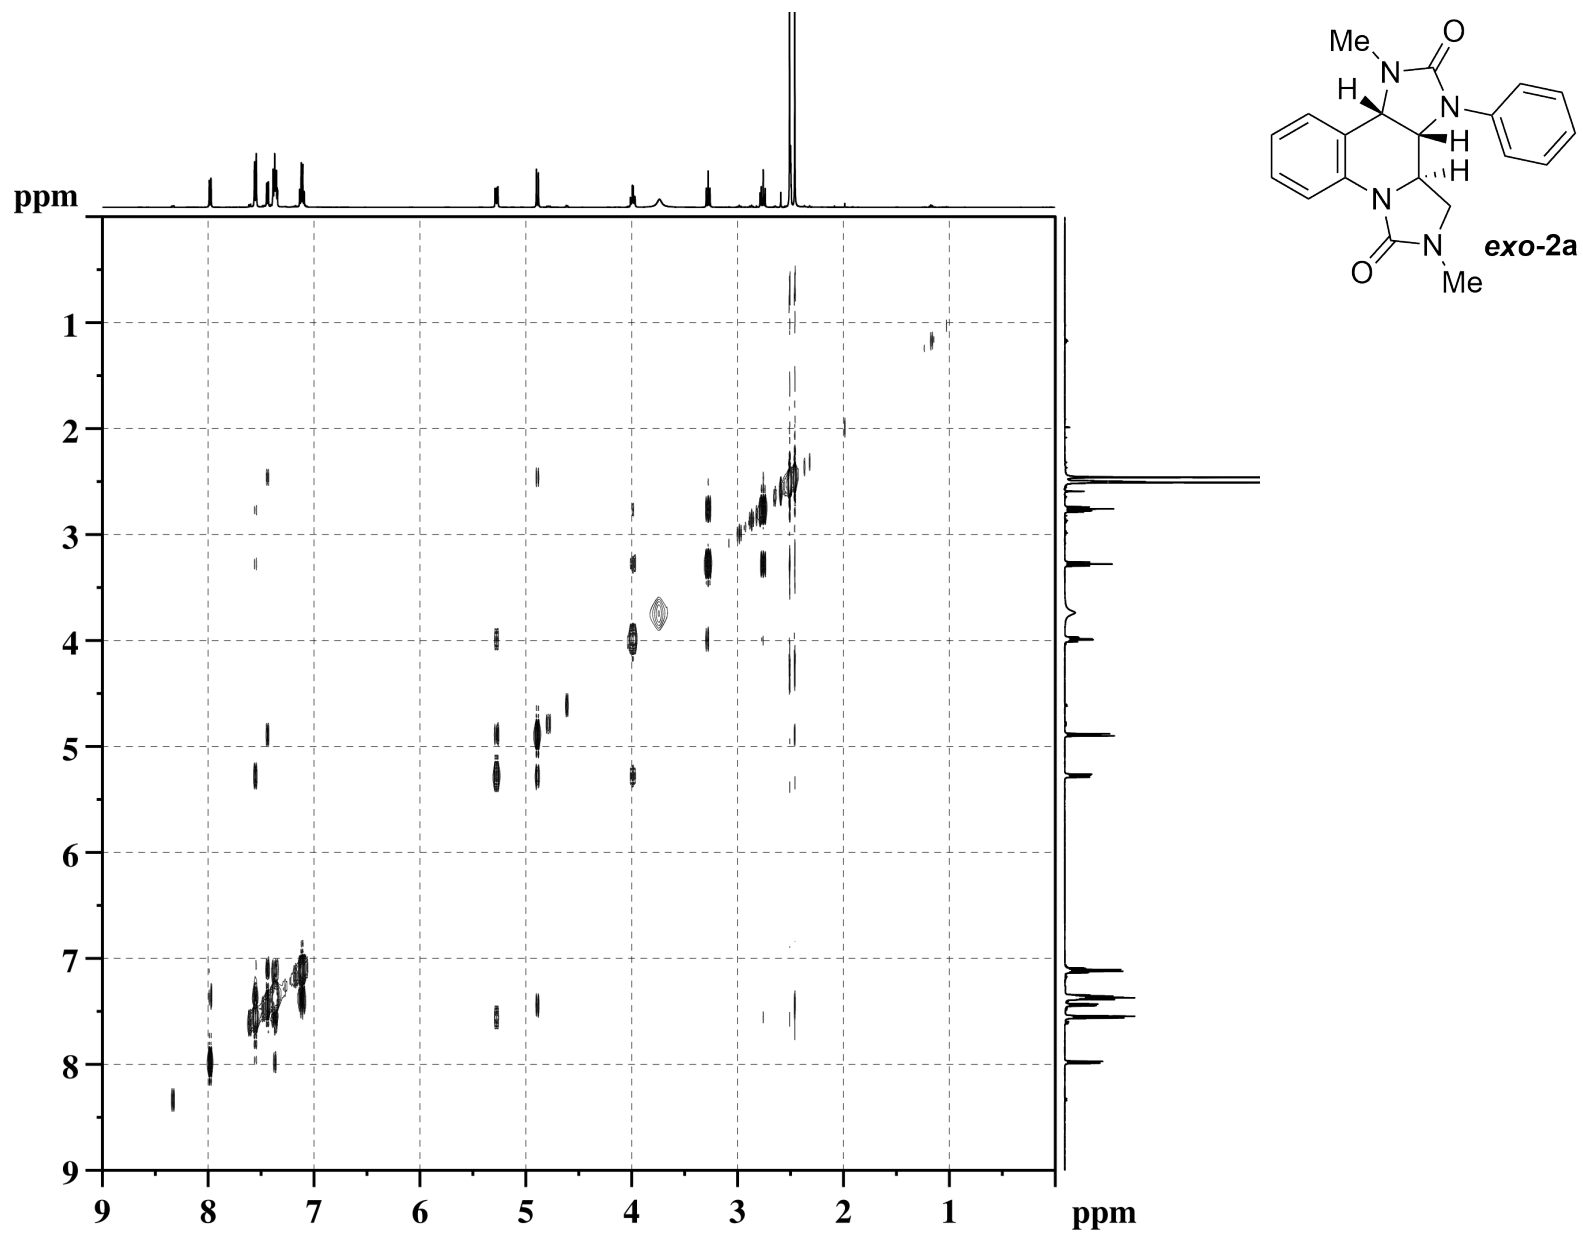

Figure S14. NOESY spectrum ( $(\text{CD}_3)_2\text{SO}$ , 303 K) of the compound *exo-2a*

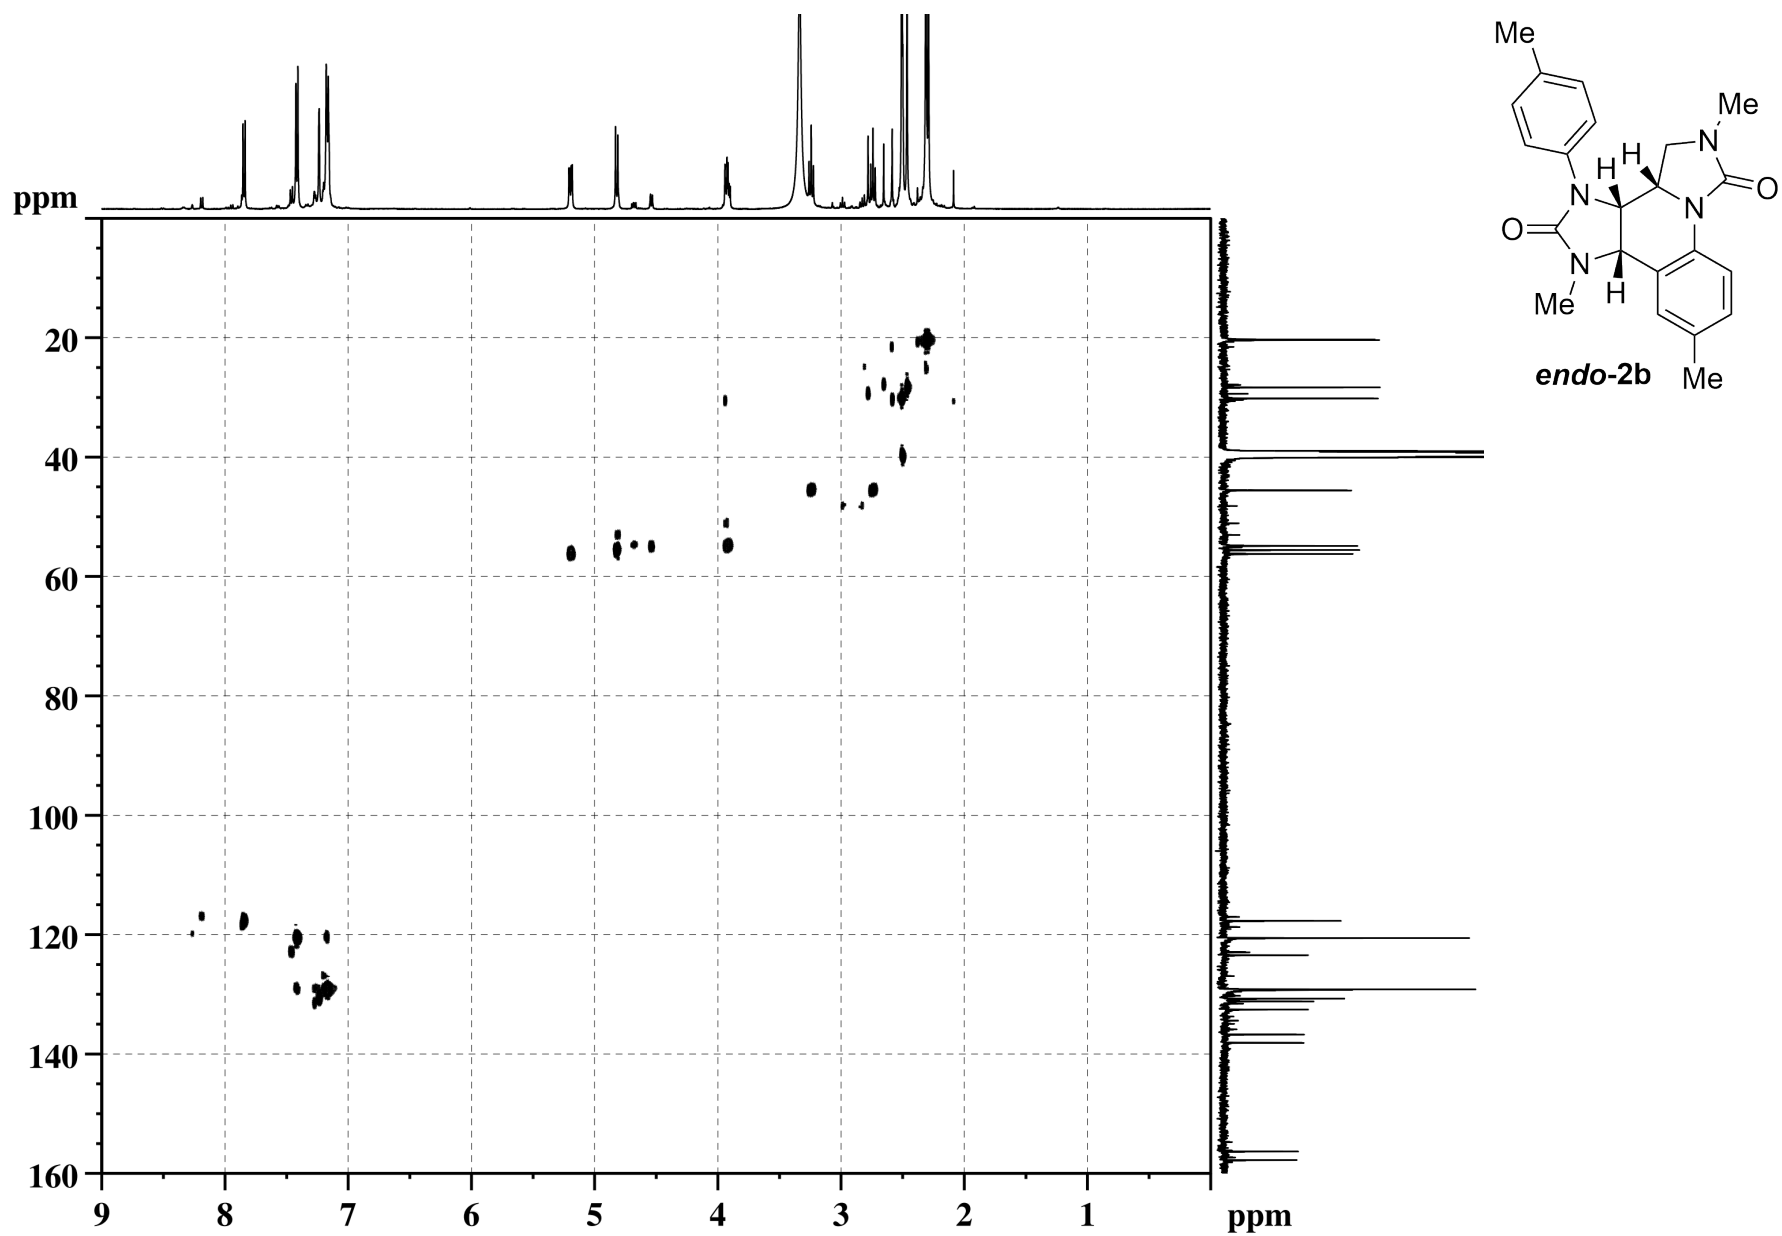

Figure S15.  $^1\text{H}$ - $^{13}\text{C}$  HSQC spectrum ( $(\text{CD}_3)_2\text{SO}$ , 303 K) of the compound *endo-2b*

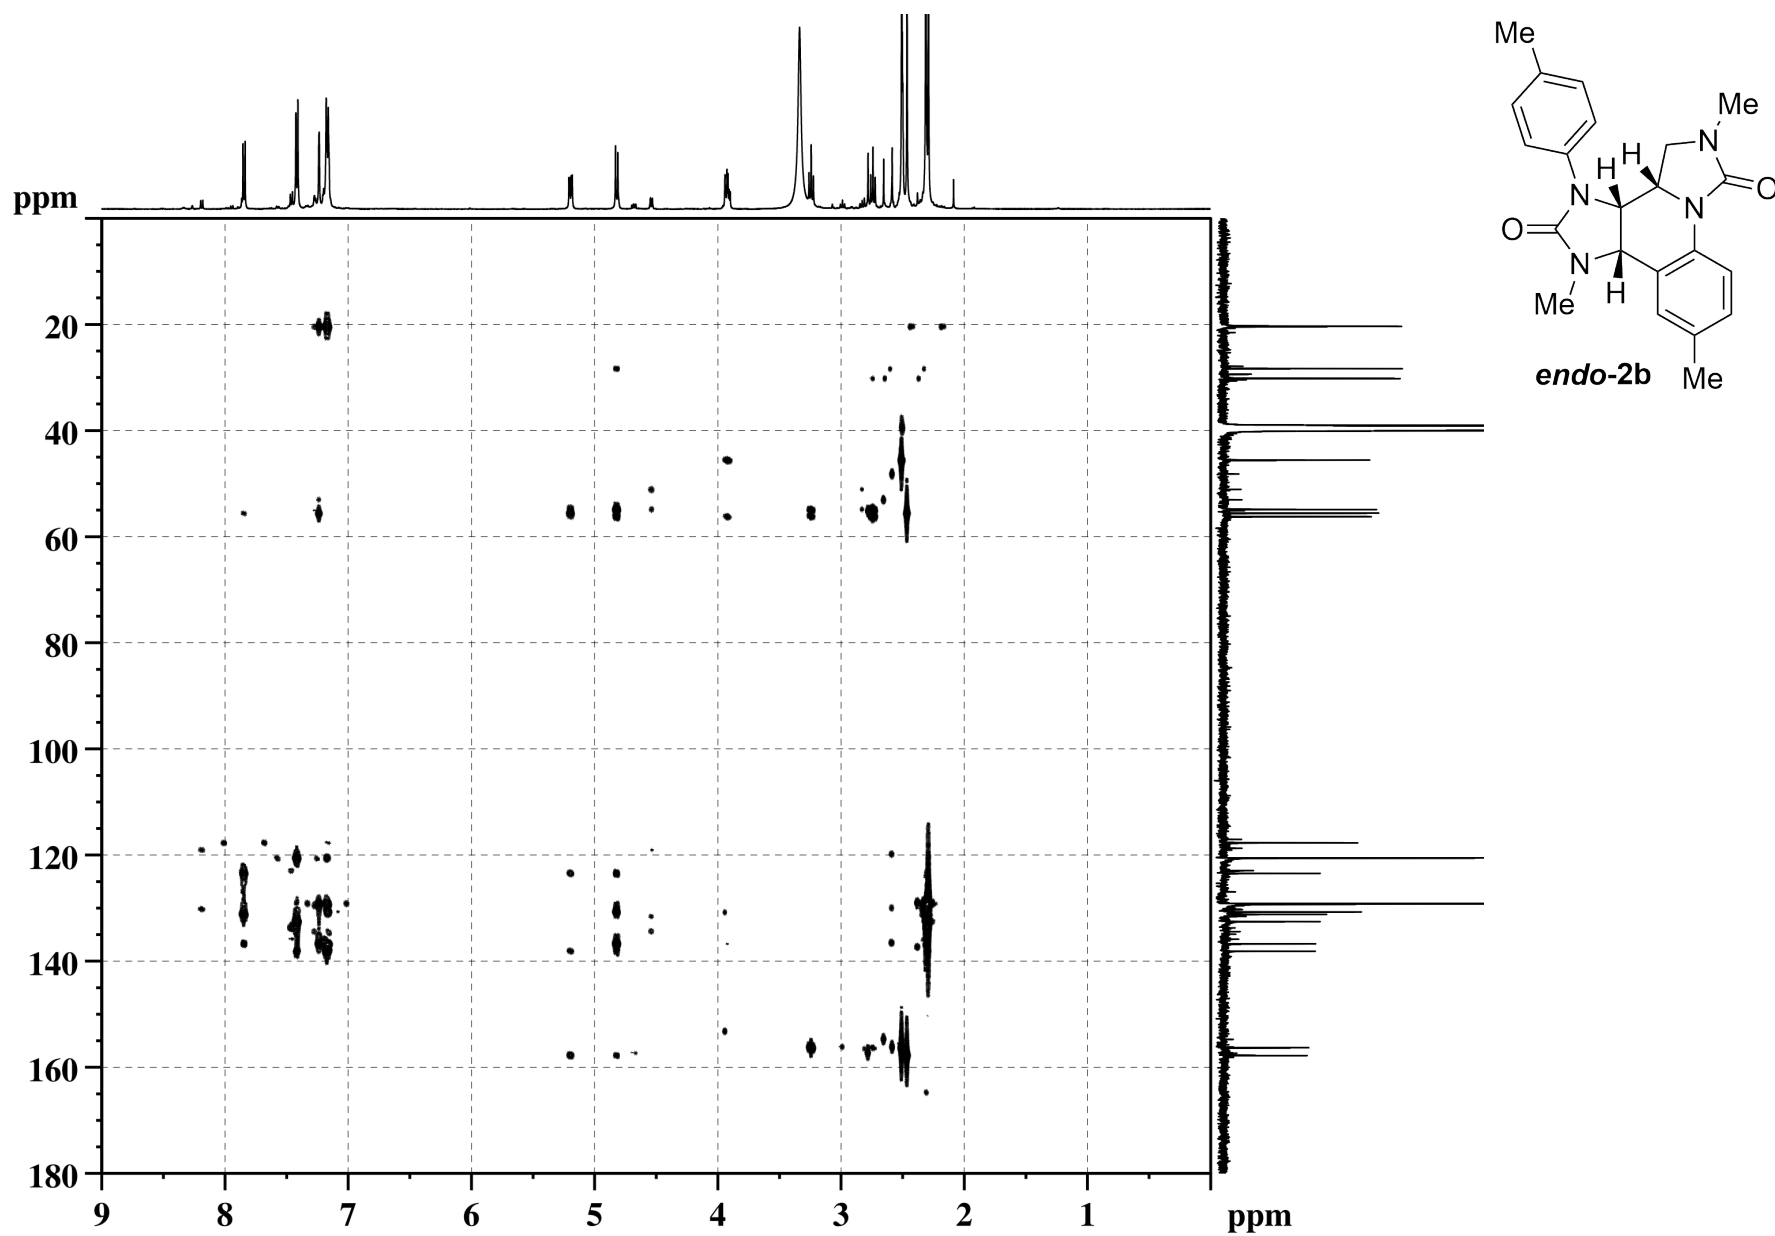

Figure S16.  $^1\text{H}$ - $^{13}\text{C}$  HMBC spectrum ( $(\text{CD}_3)_2\text{SO}$ , 303 K) of the compound *endo-2b*

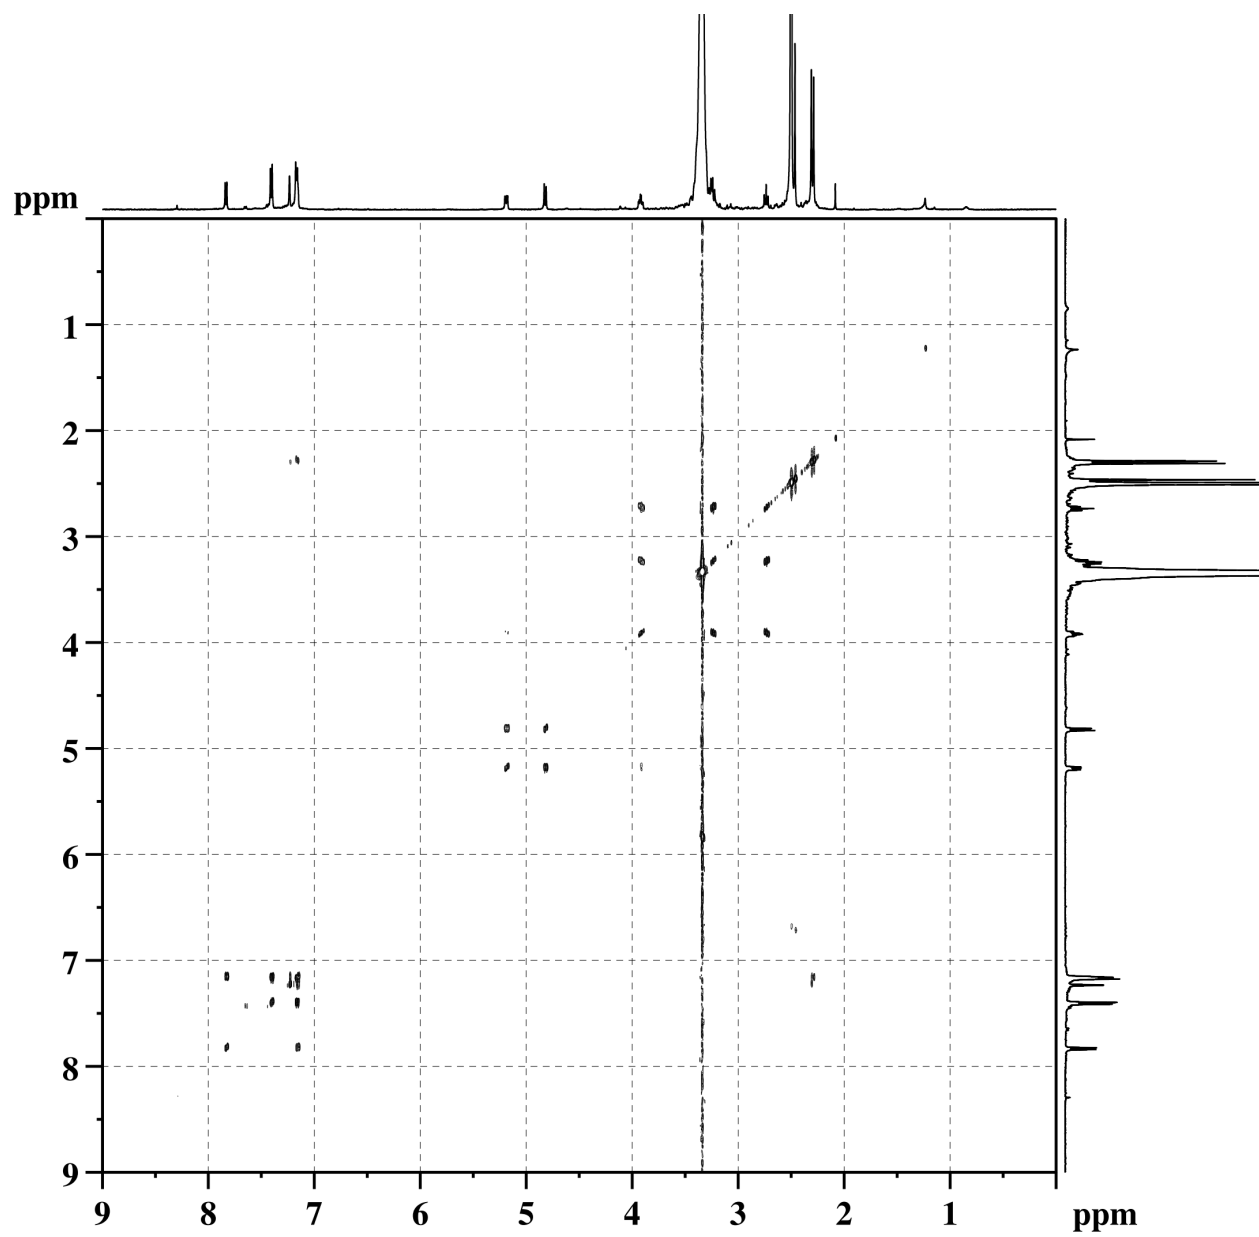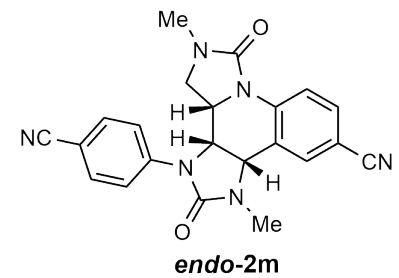

Figure S17. COSY spectrum ( $(\text{CD}_3)_2\text{SO}$ , 303 K) of the compound *endo-2m*

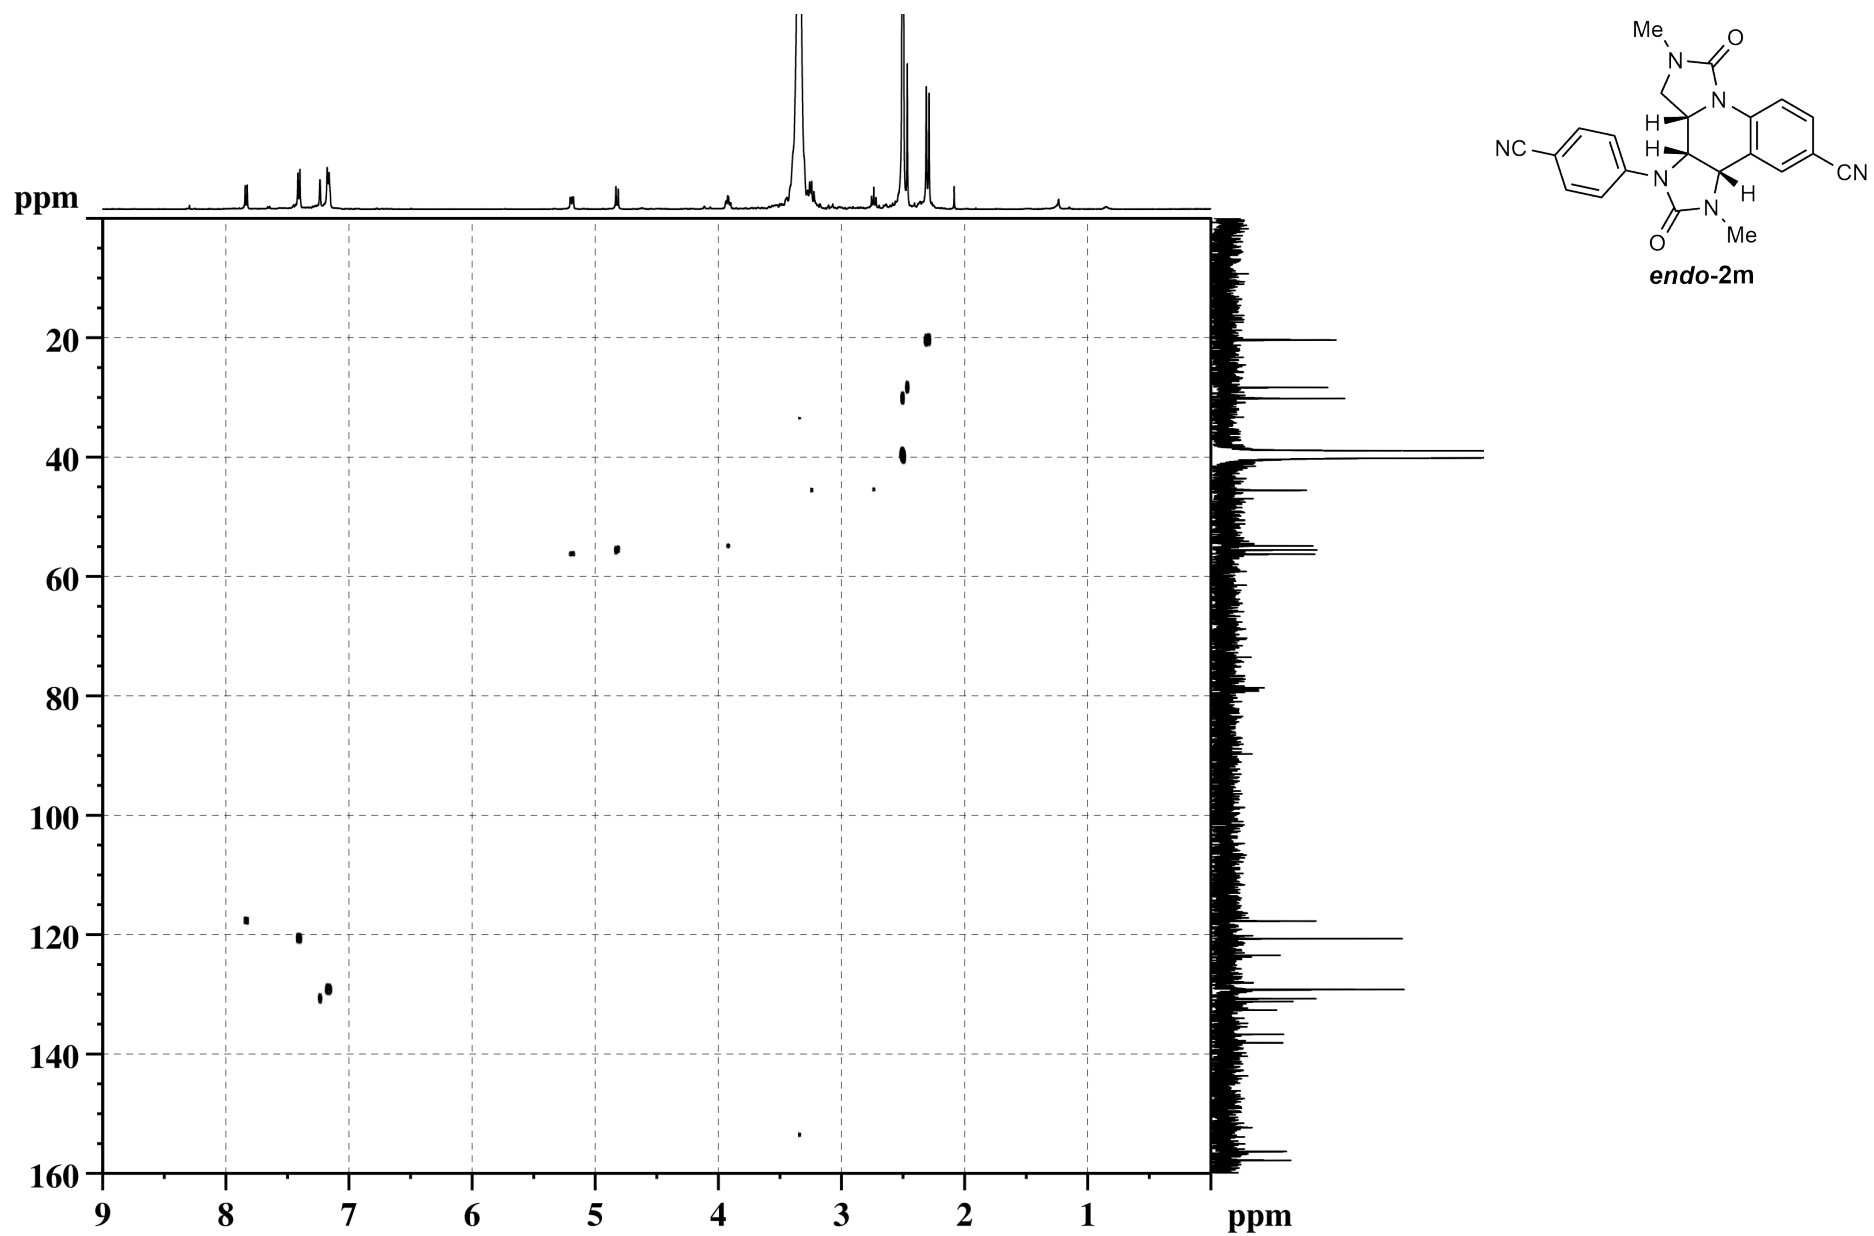

Figure S18.  $^1\text{H}$ - $^{13}\text{C}$  HSQC spectrum ( $(\text{CD}_3)_2\text{SO}$ , 303 K) of the compound *endo-2m*

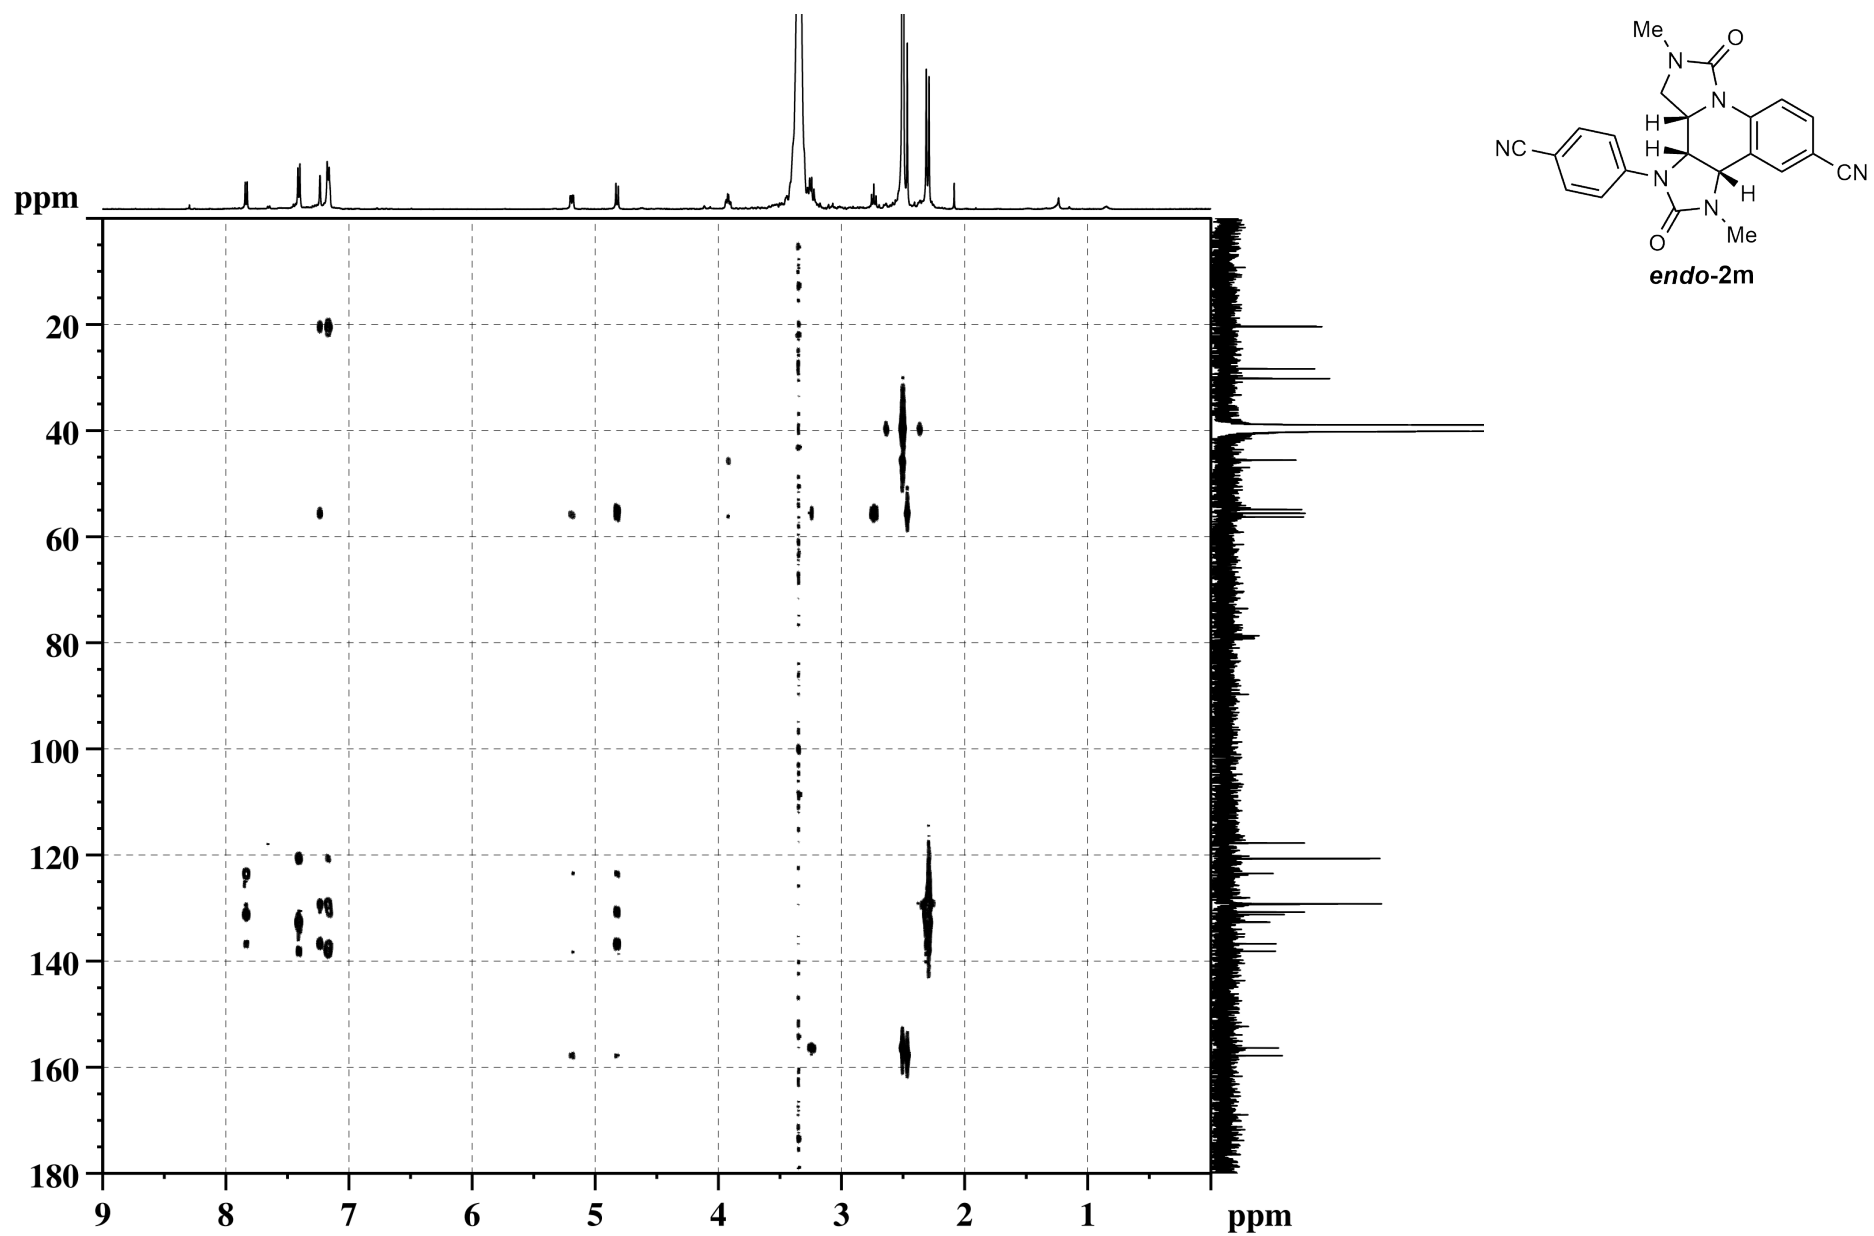

Figure S19.  $^1\text{H}$ - $^{13}\text{C}$  HMBC spectrum ( $(\text{CD}_3)_2\text{SO}$ , 303 K) of the compound *endo-2m*

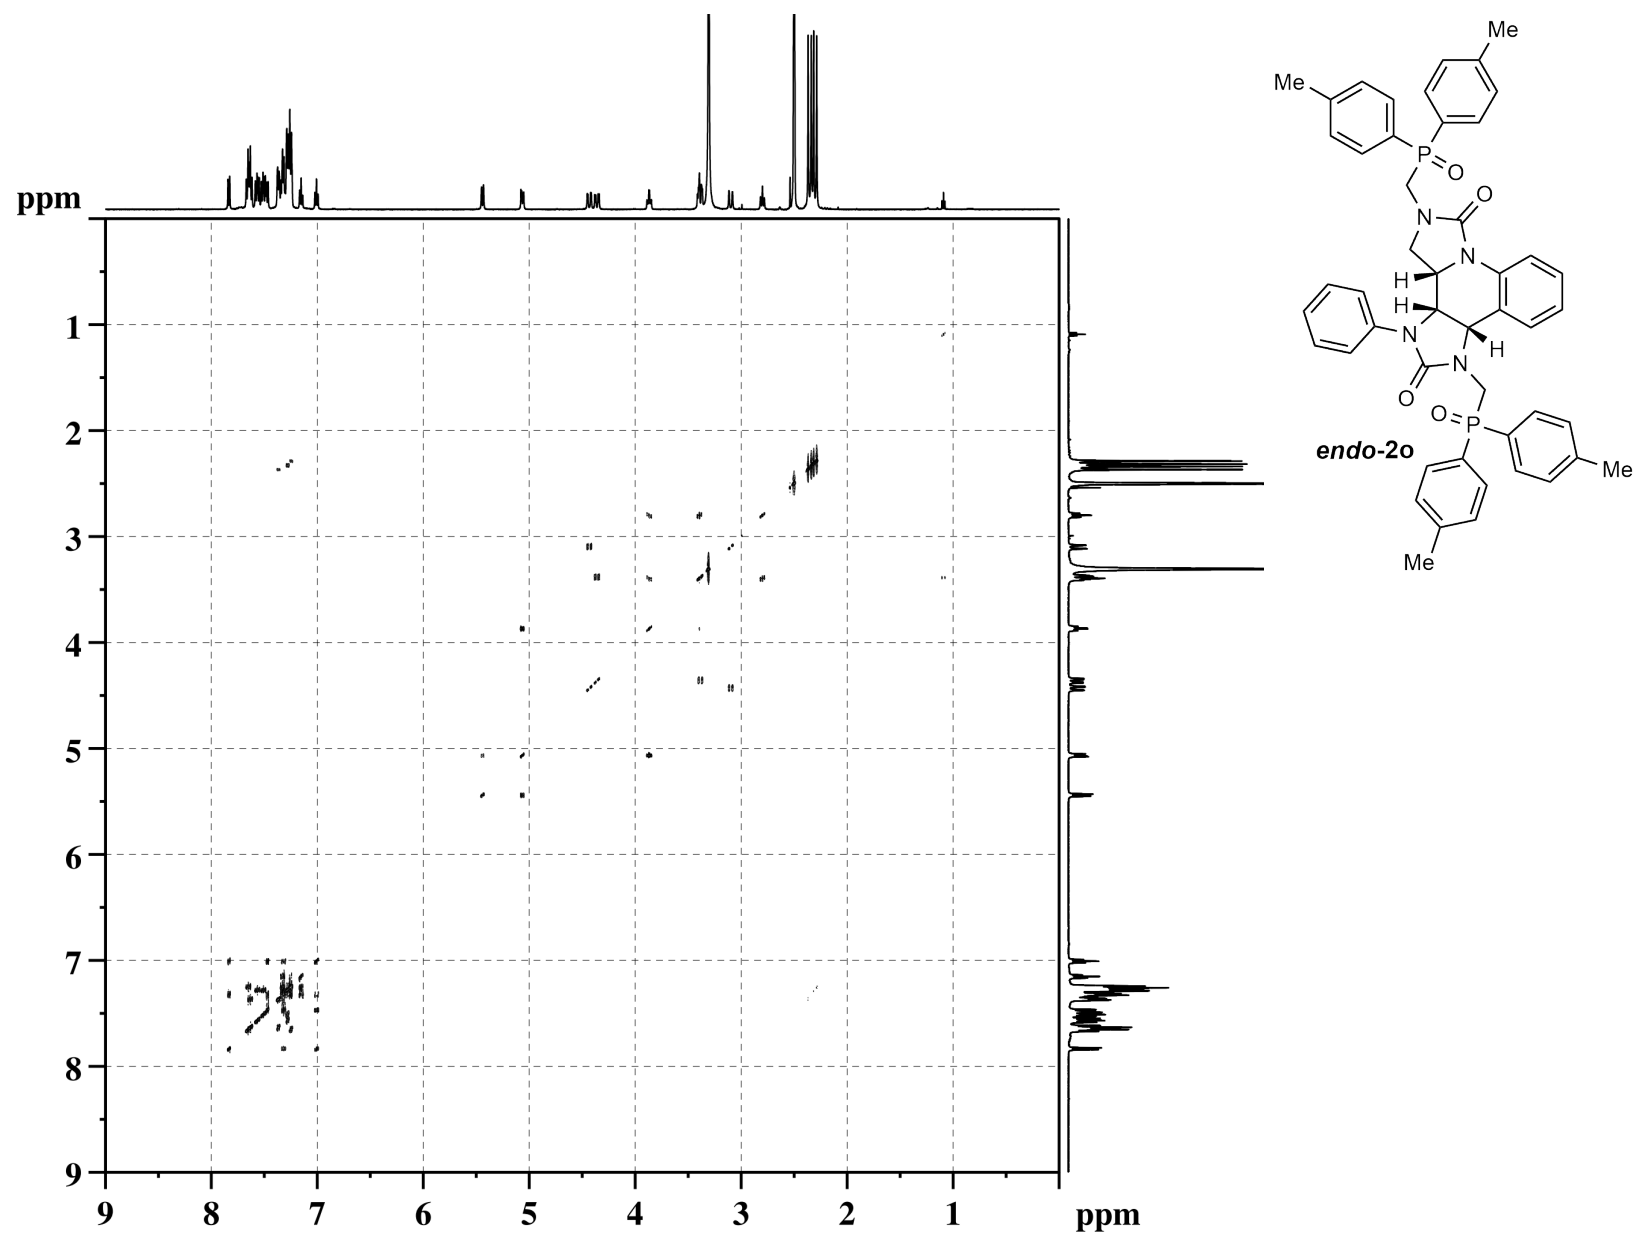

Figure S20. COSY spectrum ( $(\text{CD}_3)_2\text{SO}$ , 303 K) of the compound *endo-2o*



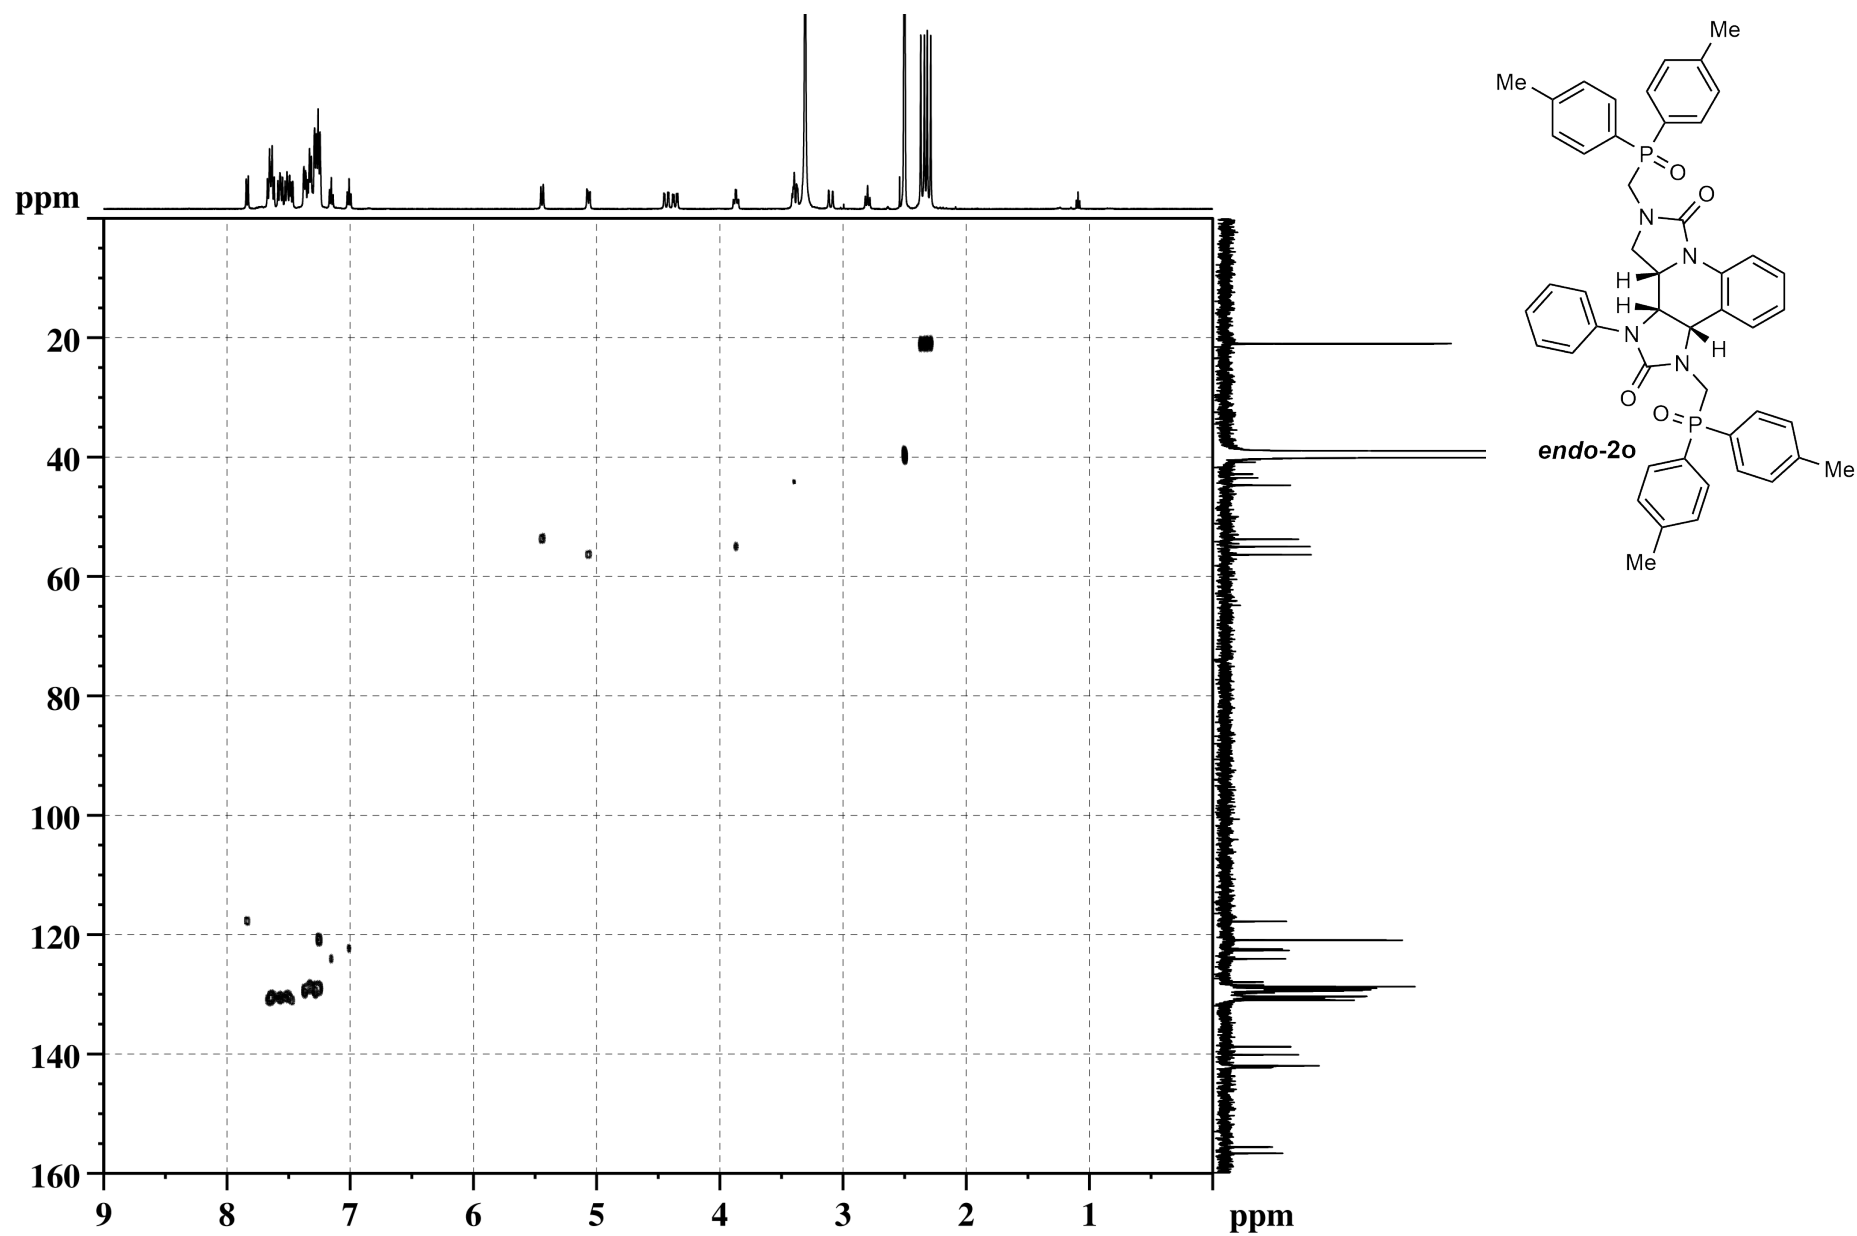

Figure S21.  $^1\text{H}$ - $^{13}\text{C}$  HSQC spectrum ( $(\text{CD}_3)_2\text{SO}$ , 303 K) of the compound *endo-2o*

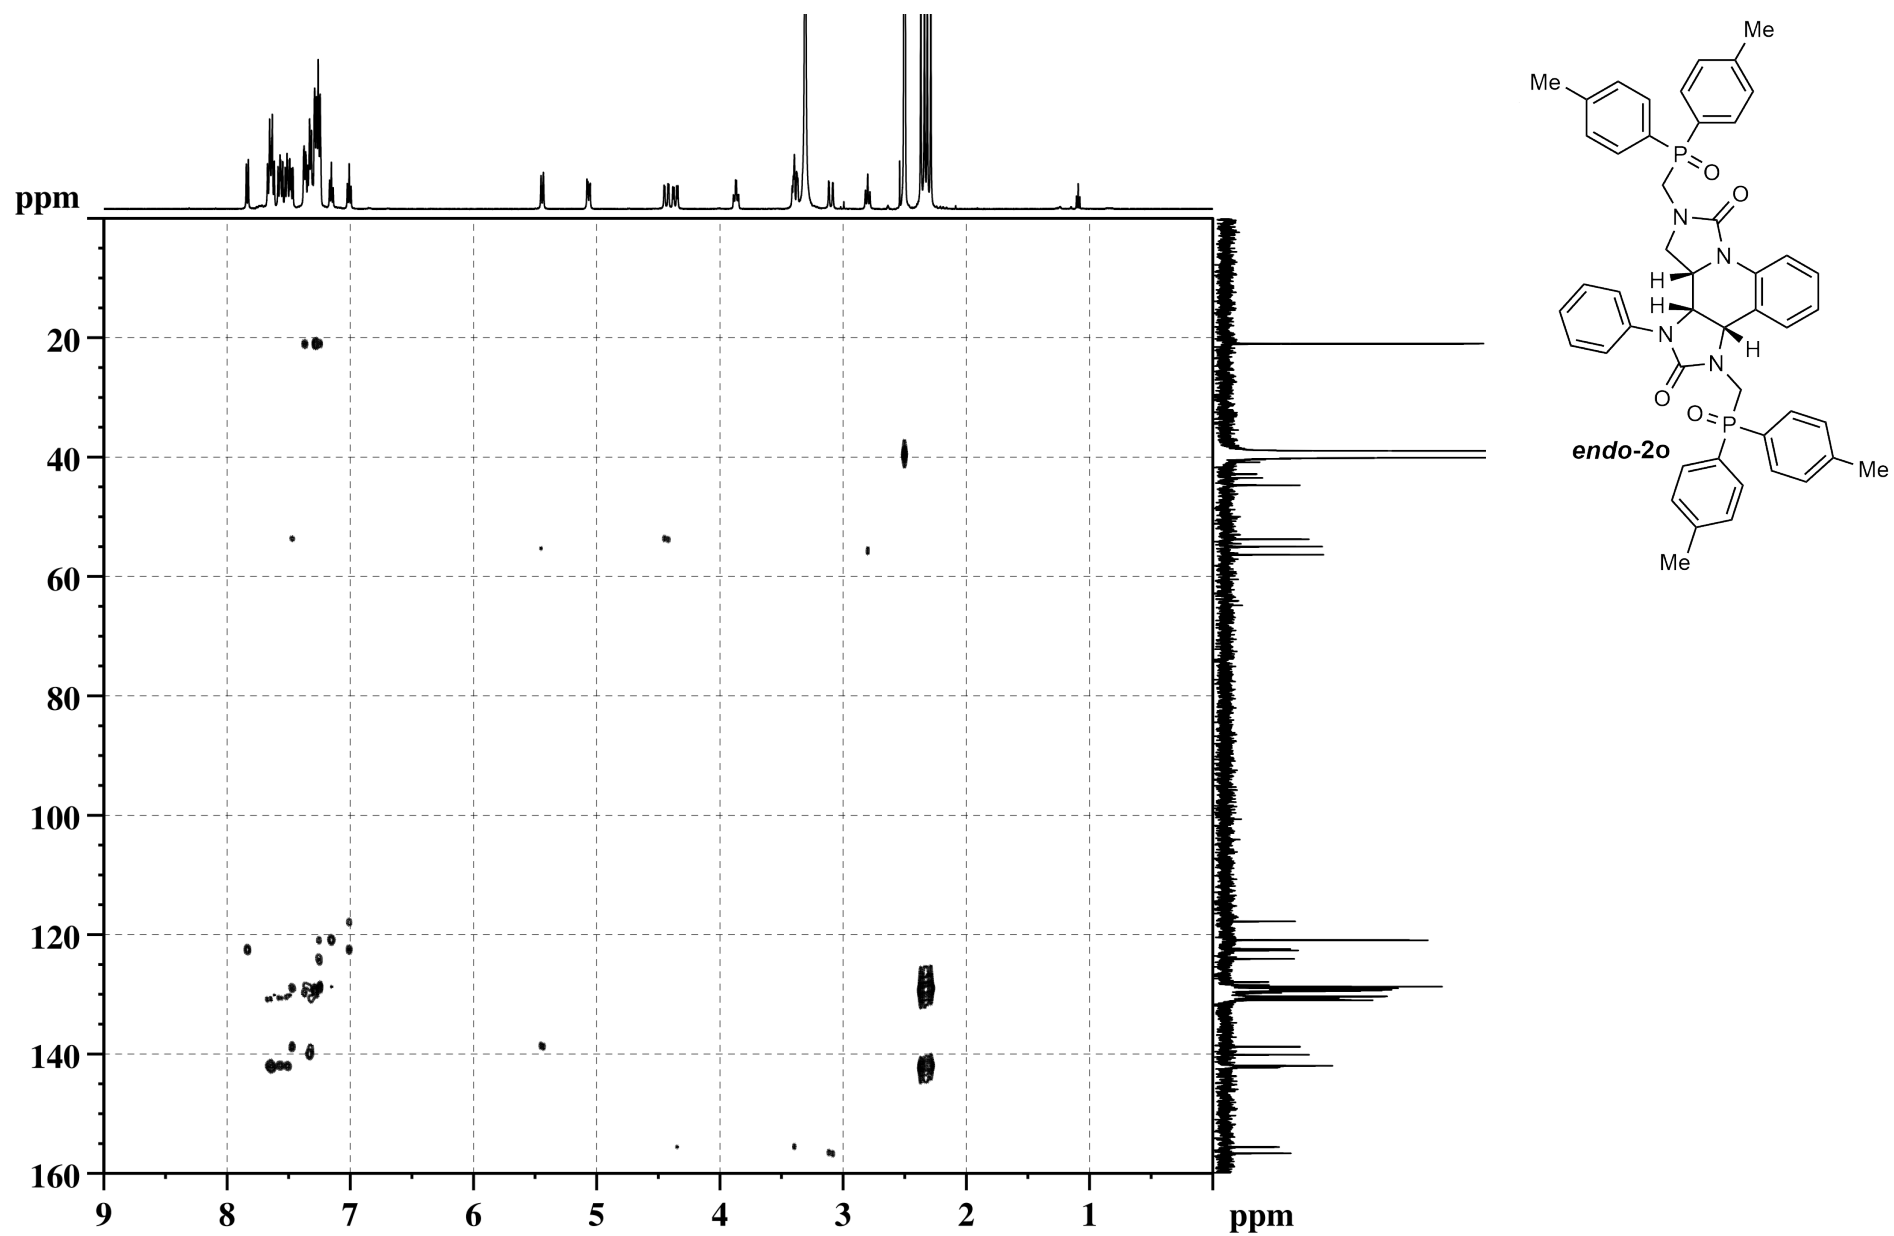

Figure S22.  $^1\text{H}$ - $^{13}\text{C}$  HMBC spectrum ( $(\text{CD}_3)_2\text{SO}$ , 303 K) of the compound *endo-2o*

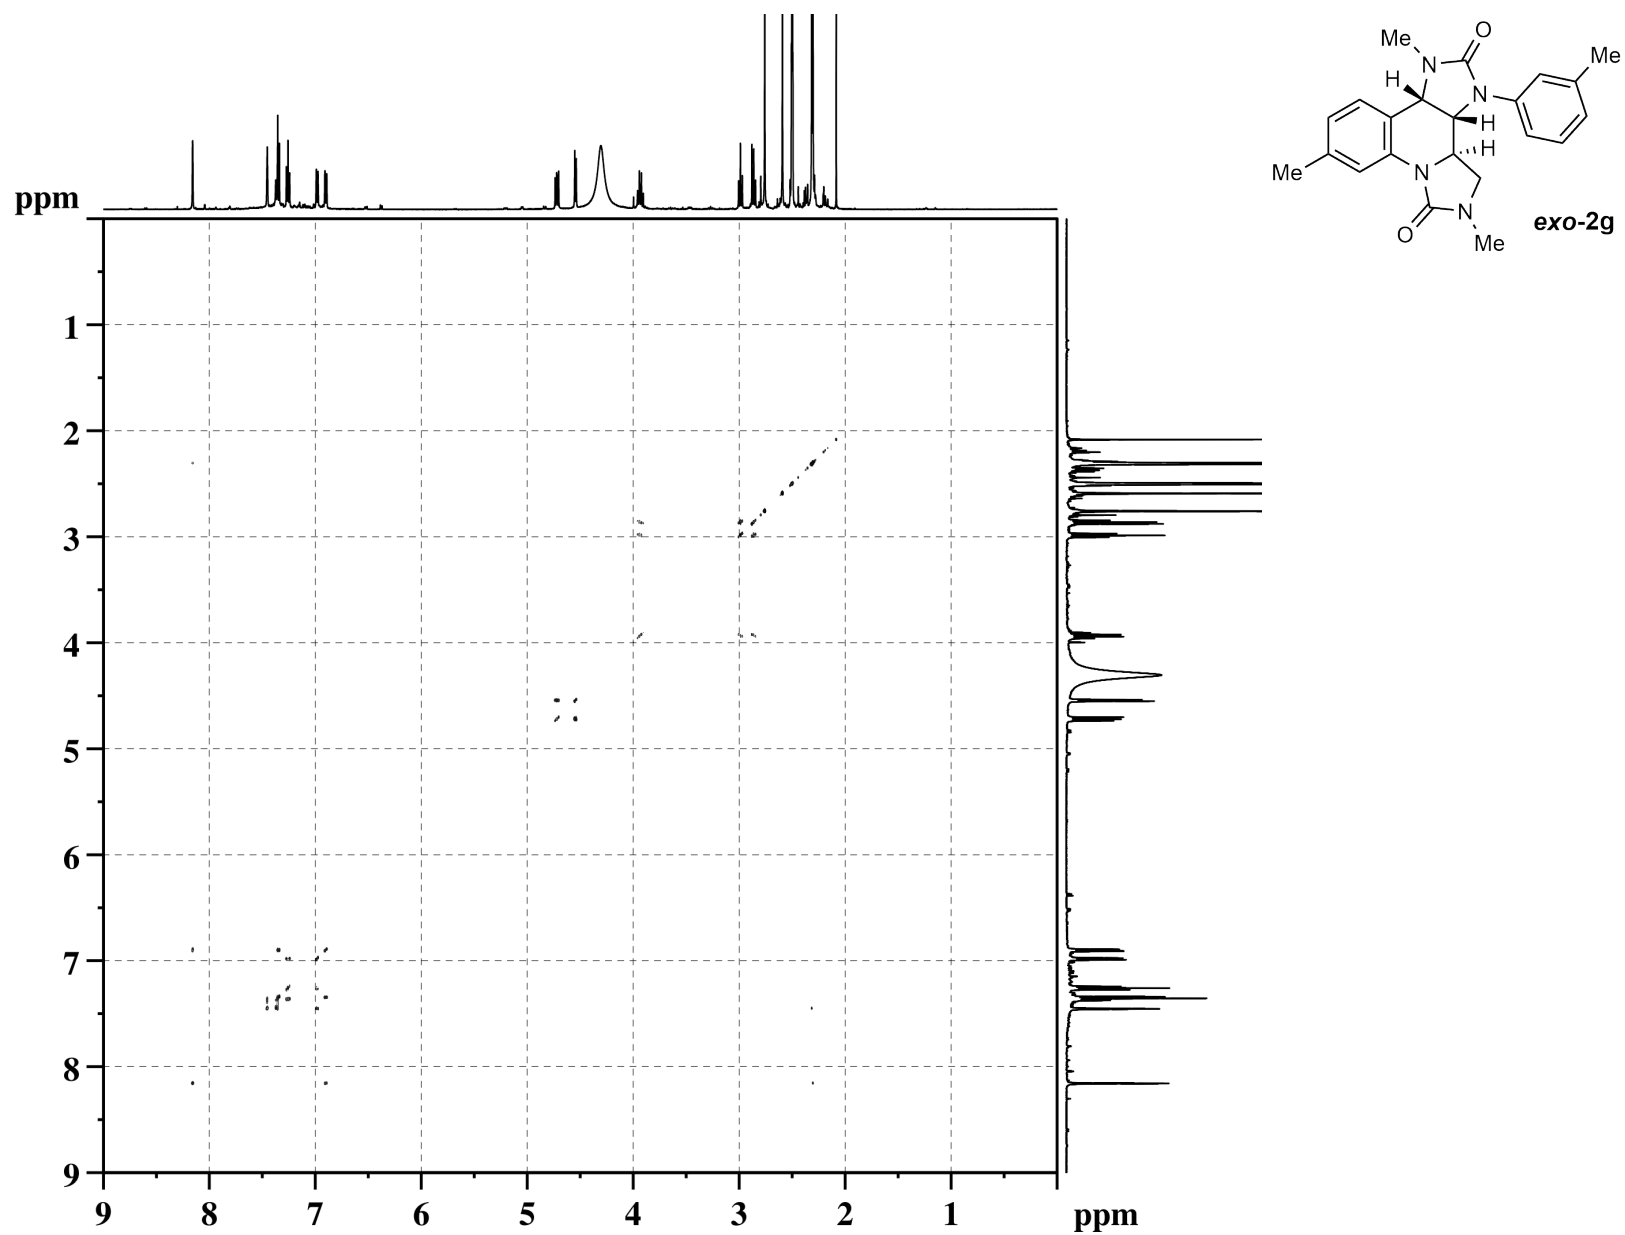

Figure S23. COSY spectrum ( $(\text{CD}_3)_2\text{SO}$ , 303 K) of the compound **exo-2g**

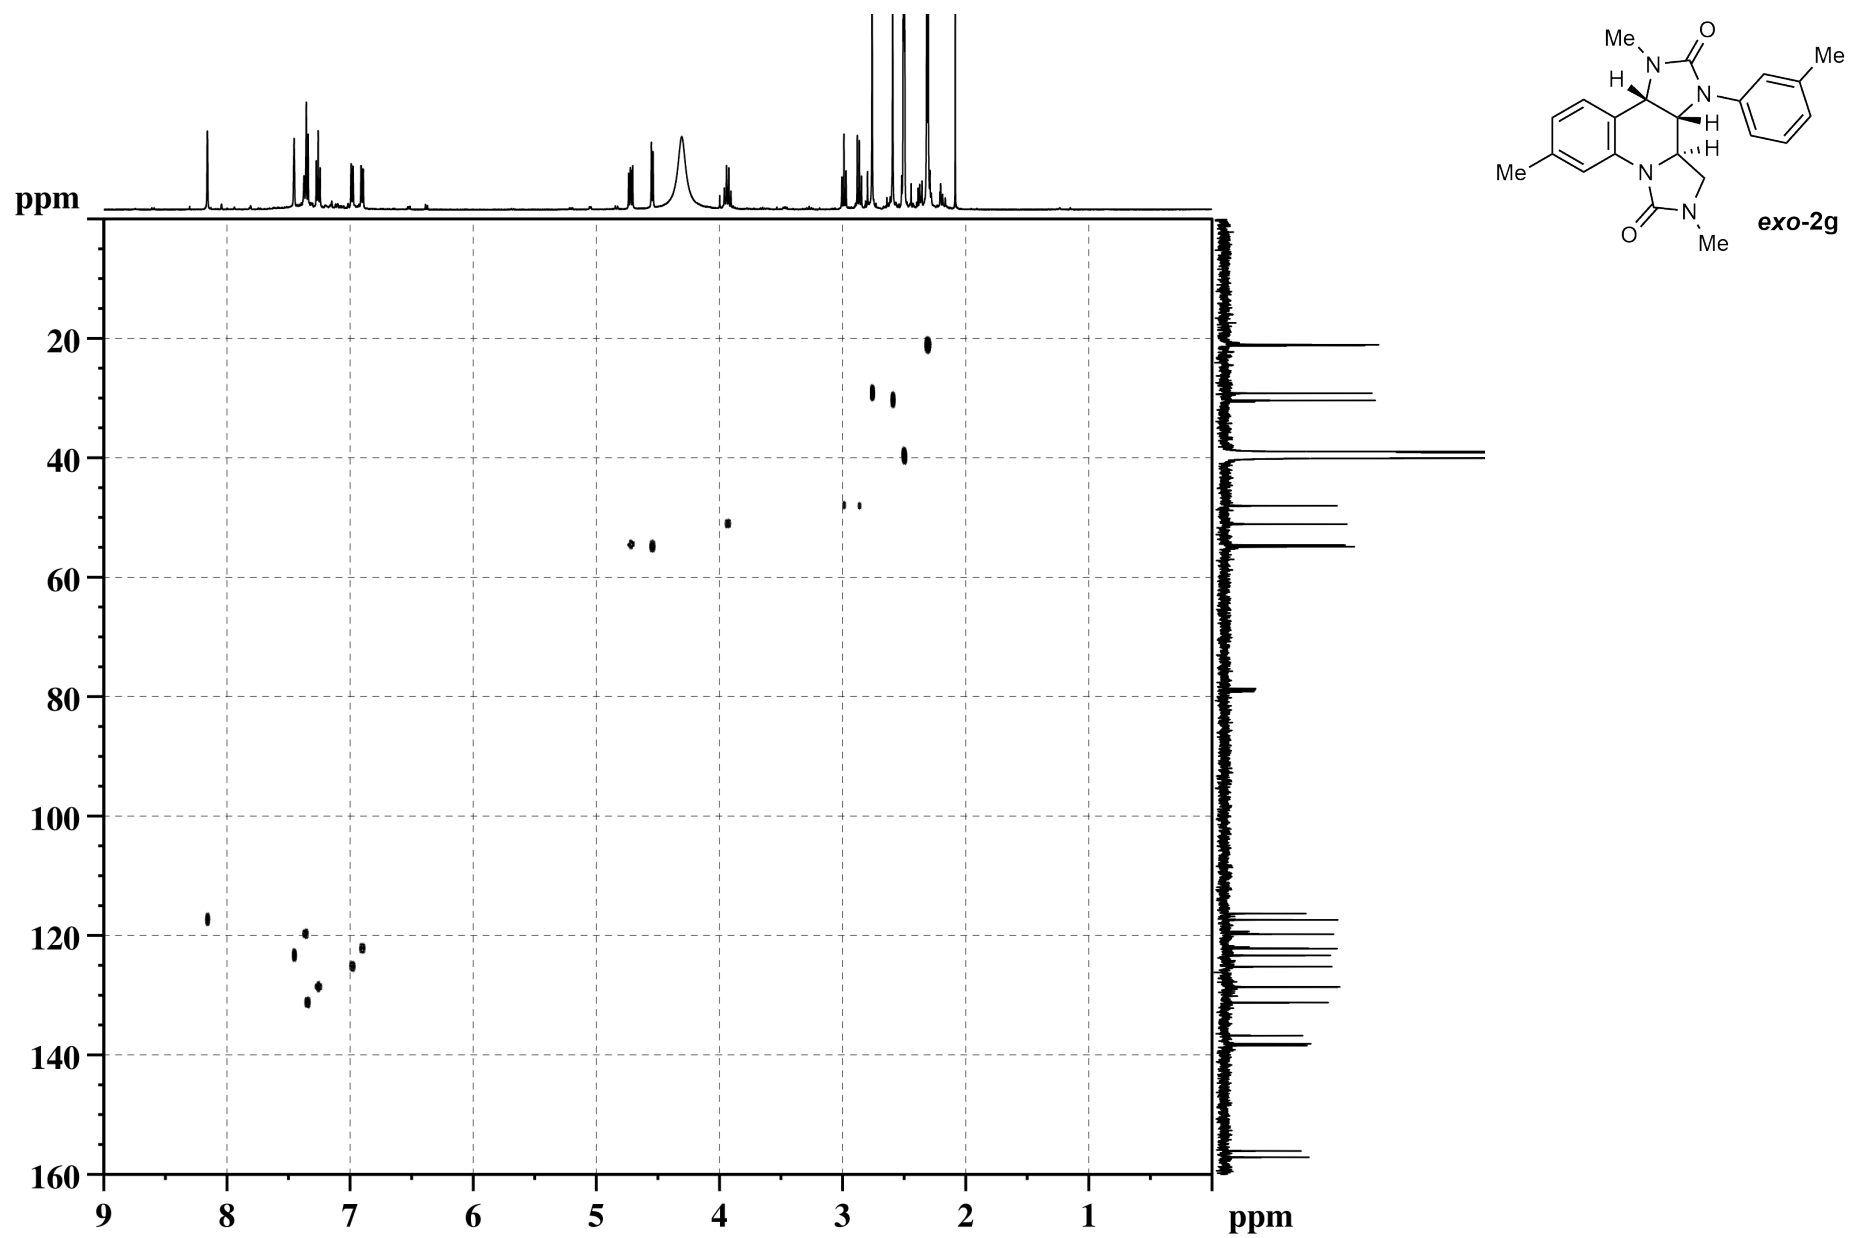

Figure S24.  $^1\text{H}$ - $^{13}\text{C}$  HSQC spectrum ( $(\text{CD}_3)_2\text{SO}$ , 303 K) of the compound *exo-2g*

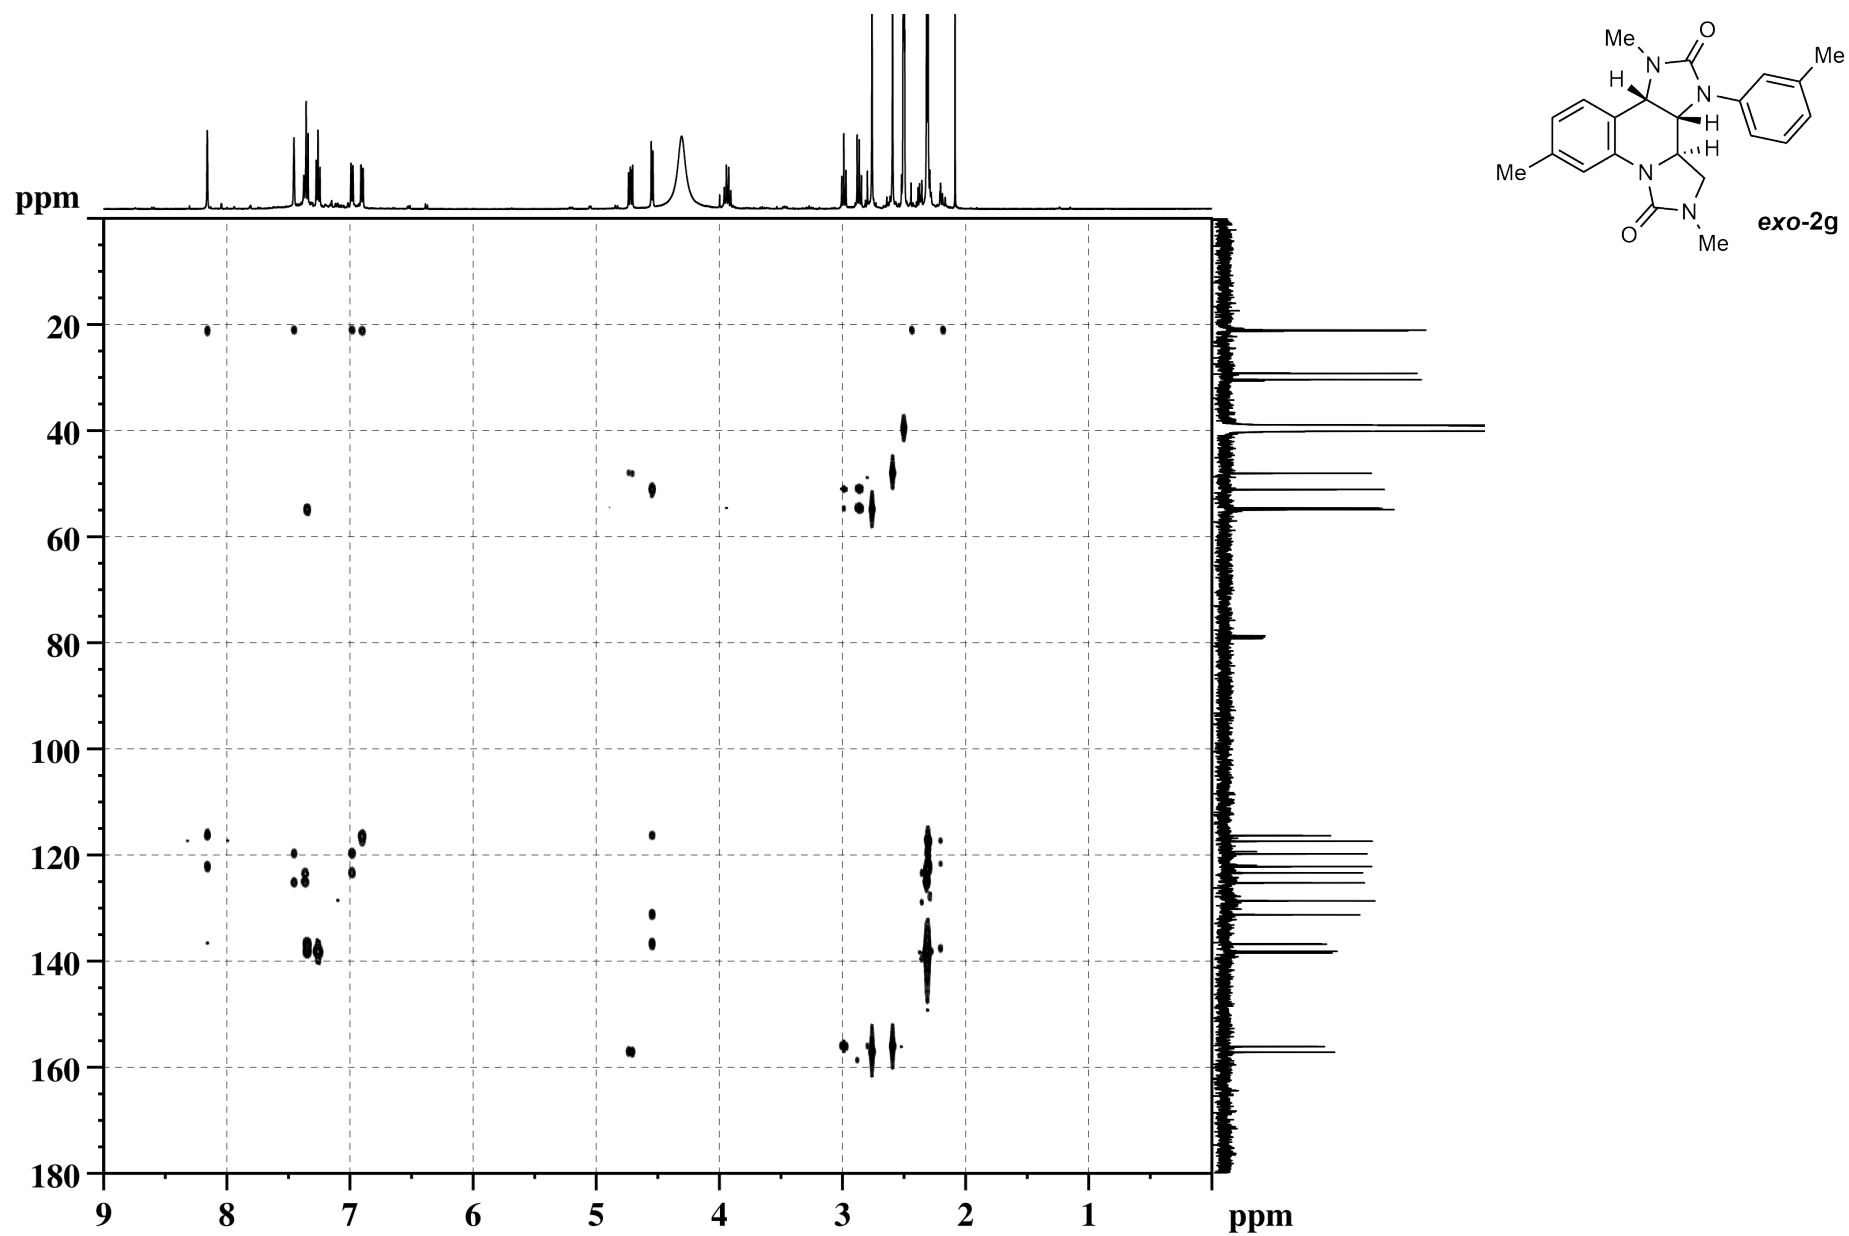

Figure S25.  $^1\text{H}$ - $^{13}\text{C}$  HMBC spectrum ( $(\text{CD}_3)_2\text{SO}$ , 303 K) of the compound *exo-2g*

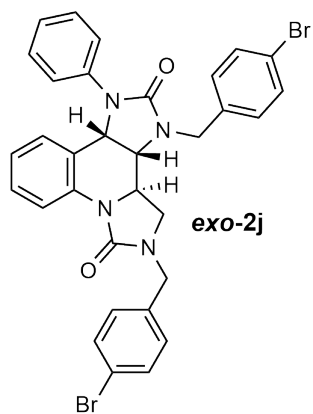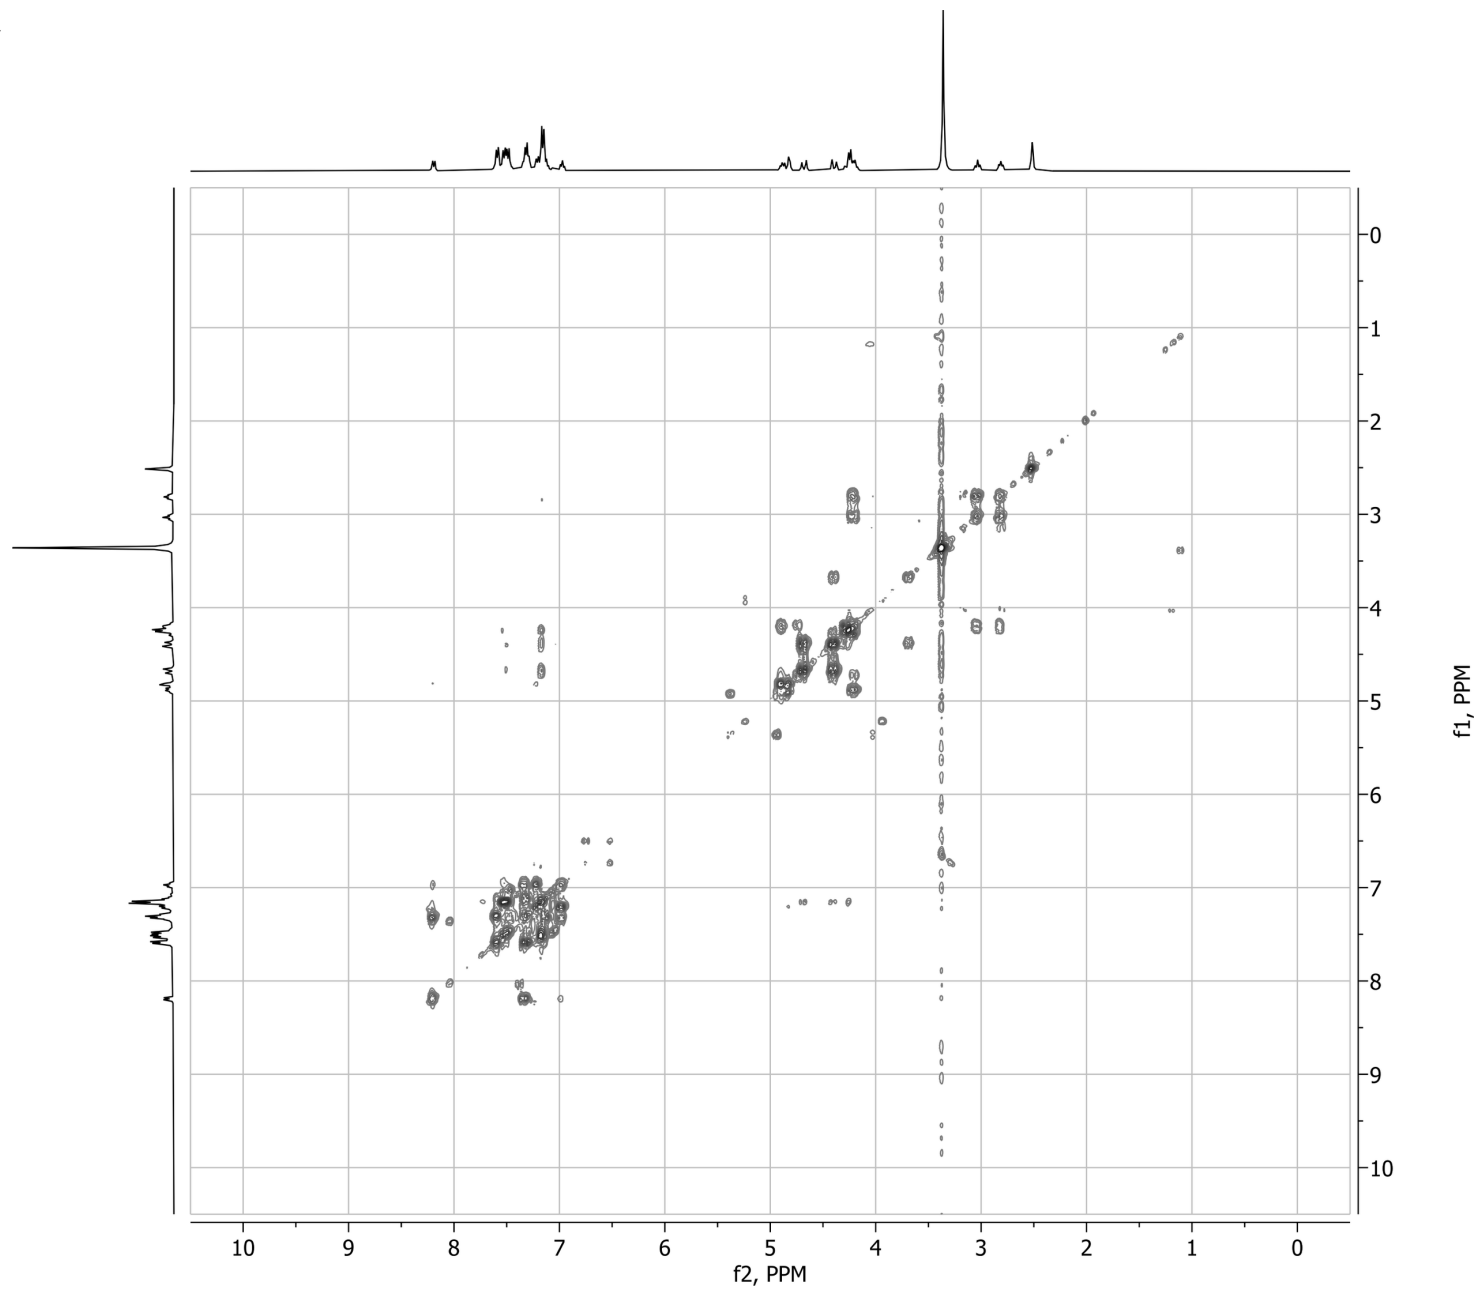

**Figure S26.** COSY spectrum ((CD<sub>3</sub>)<sub>2</sub>SO, 303 K) of the compound **exo-2j**

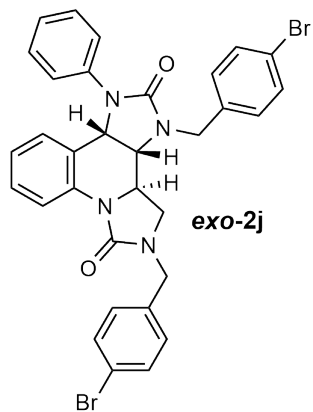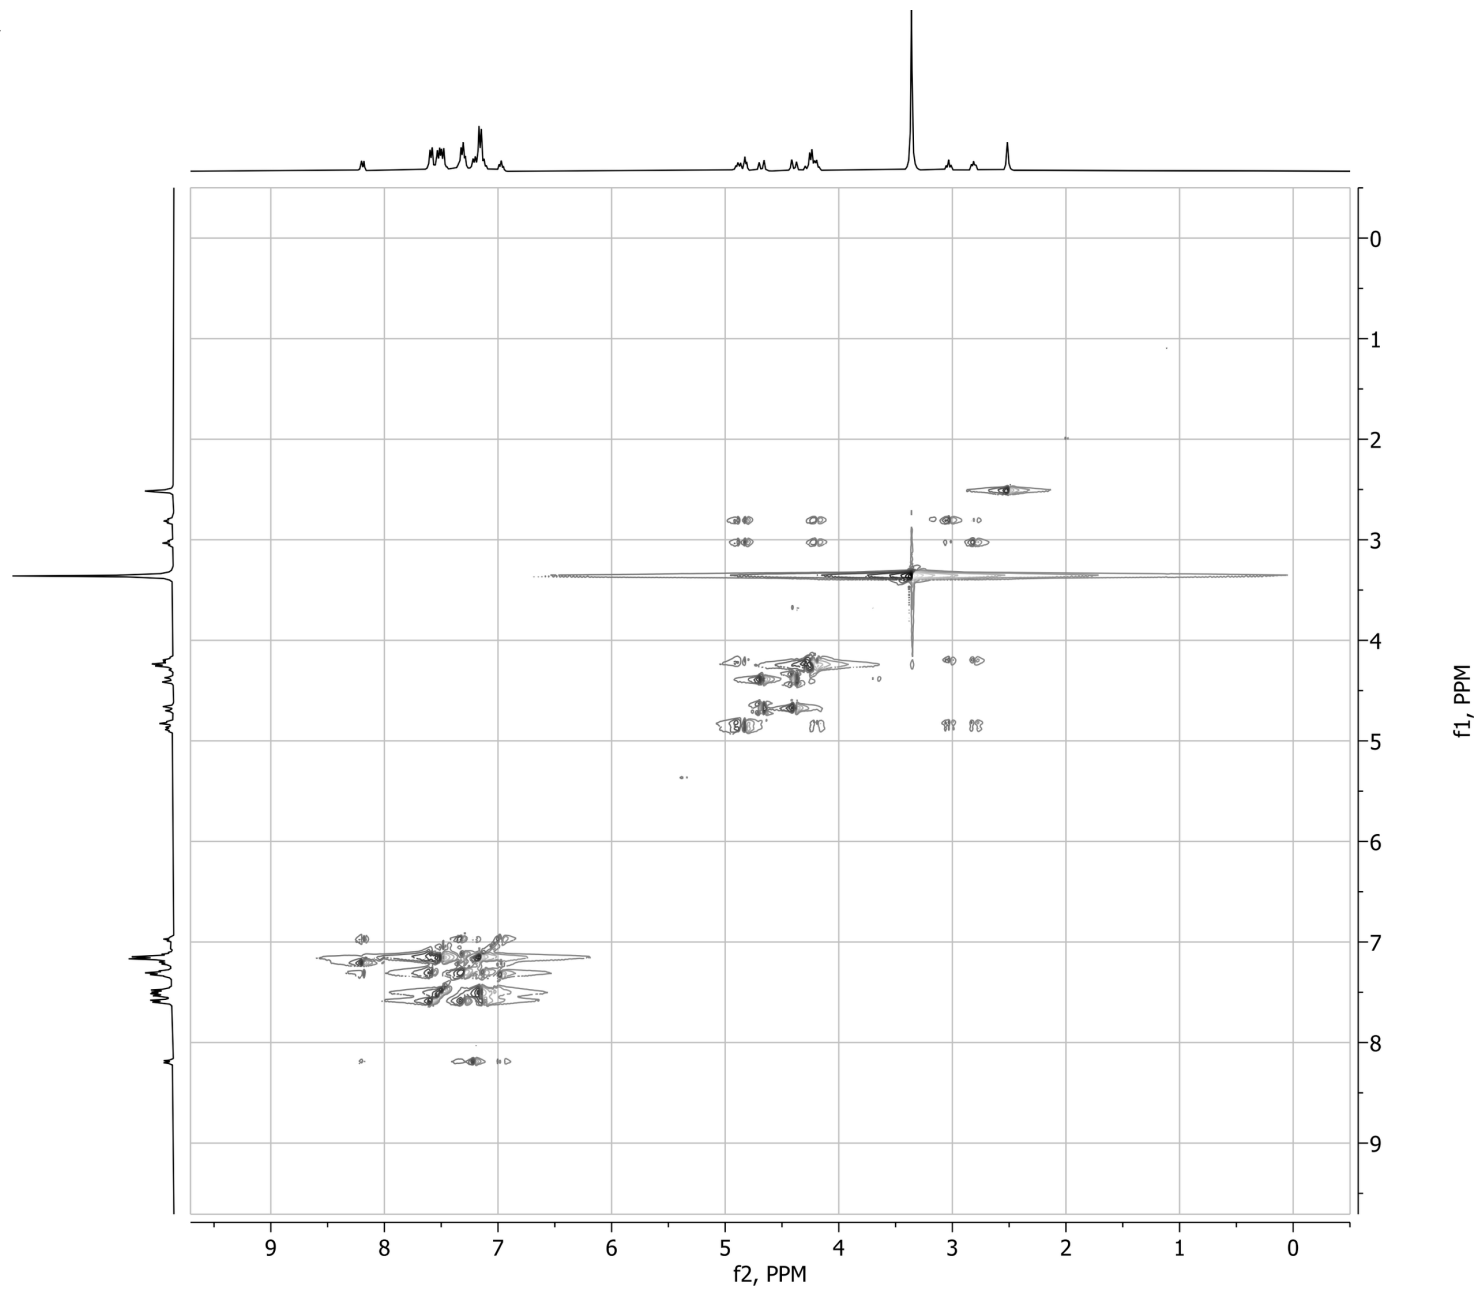

**Figure S27.** TOCSY spectrum ( $(\text{CD}_3)_2\text{SO}$ , 303 K) of the compound **exo-2j**

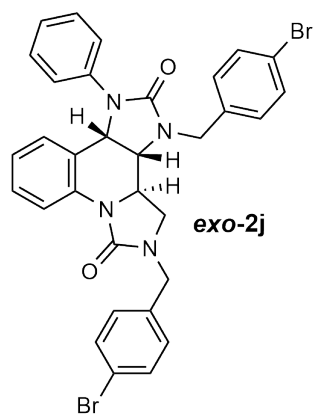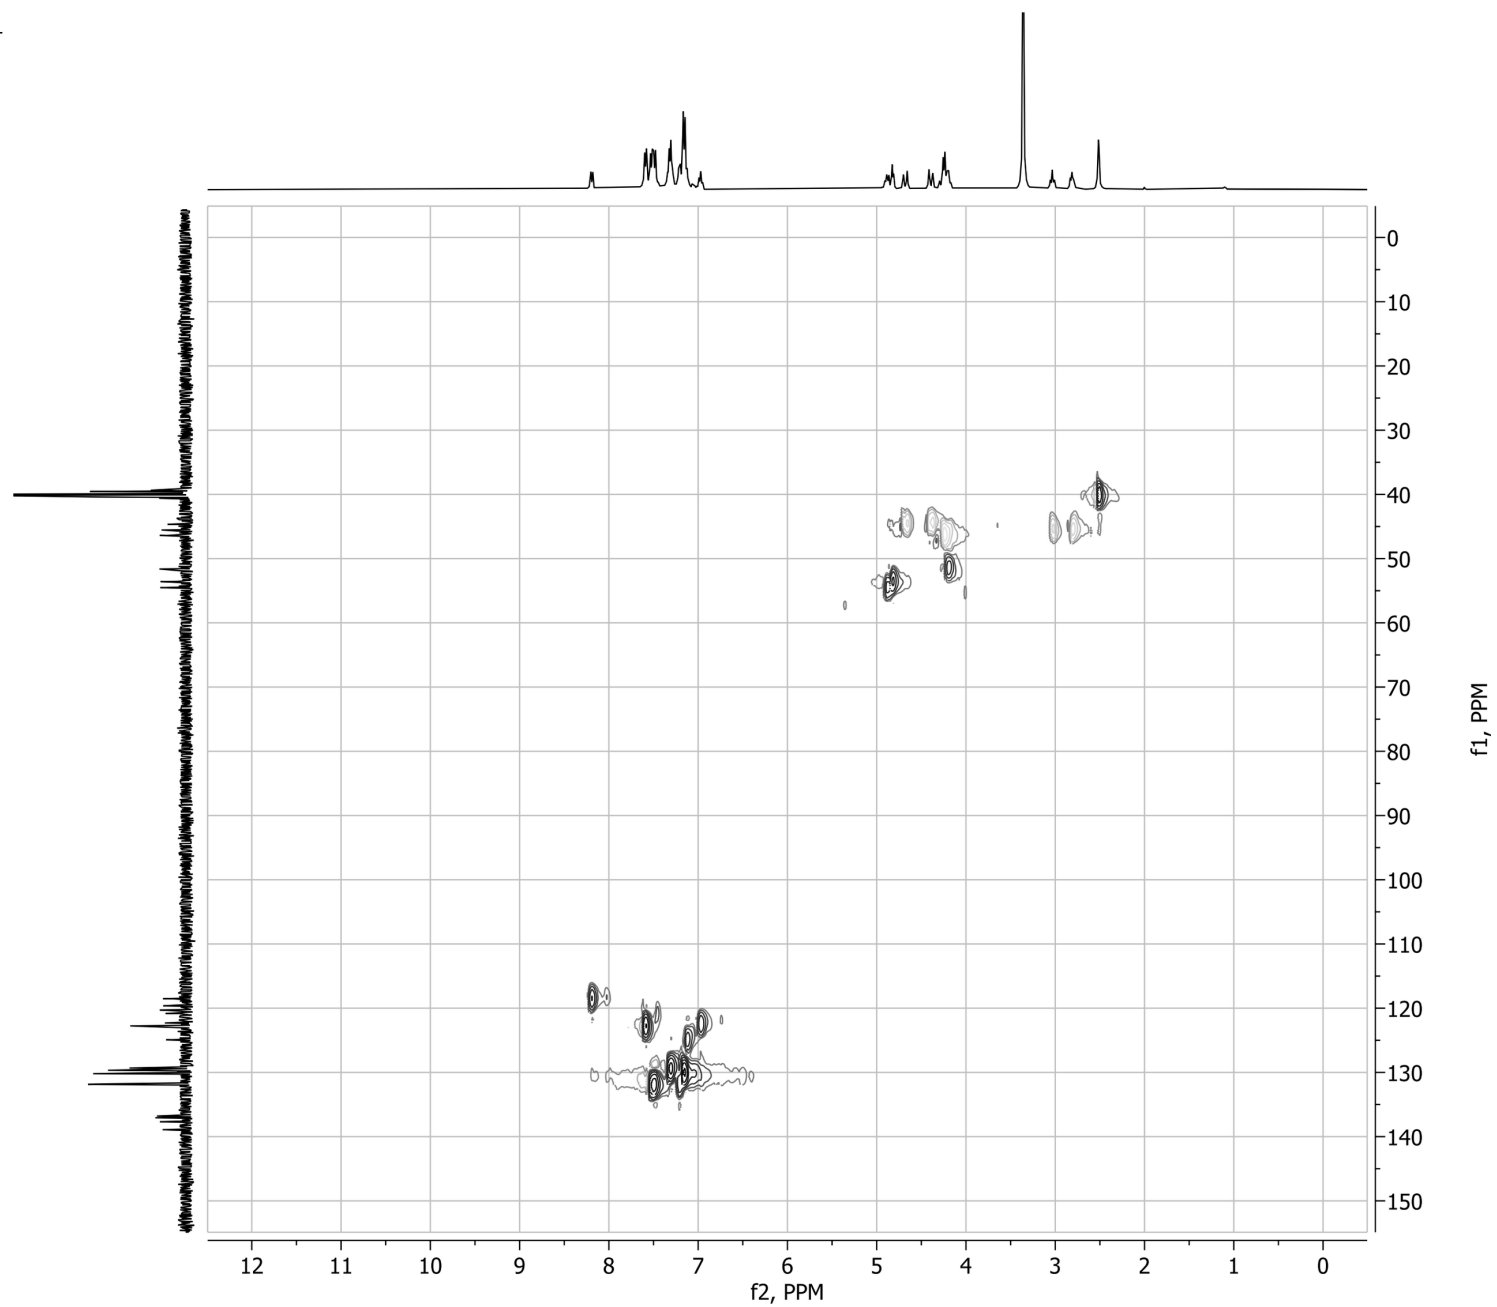

Figure S28.  $^1\text{H}$ - $^{13}\text{C}$  HSQC spectrum  $(\text{CD}_3)_2\text{SO}$ , 303 K) of the compound **exo-2j**



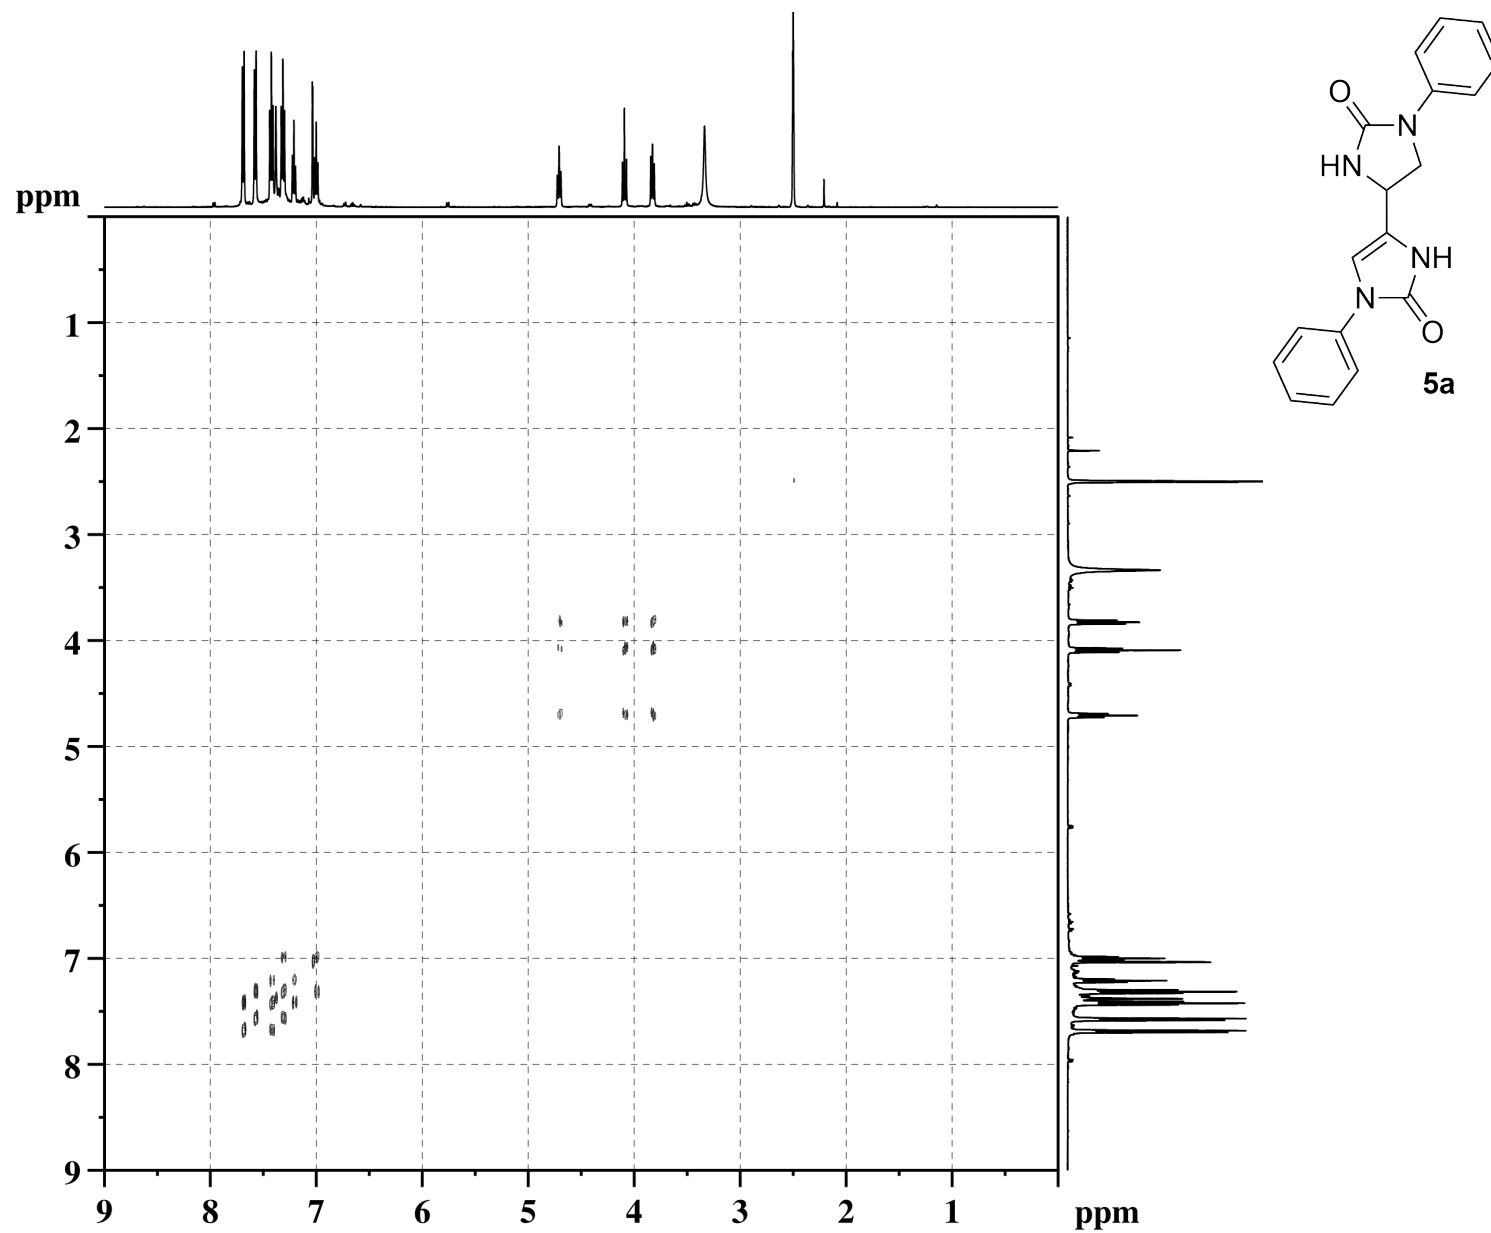

Figure S29. COSY spectrum ( $(\text{CD}_3)_2\text{SO}$ , 303 K) of the compound 5a

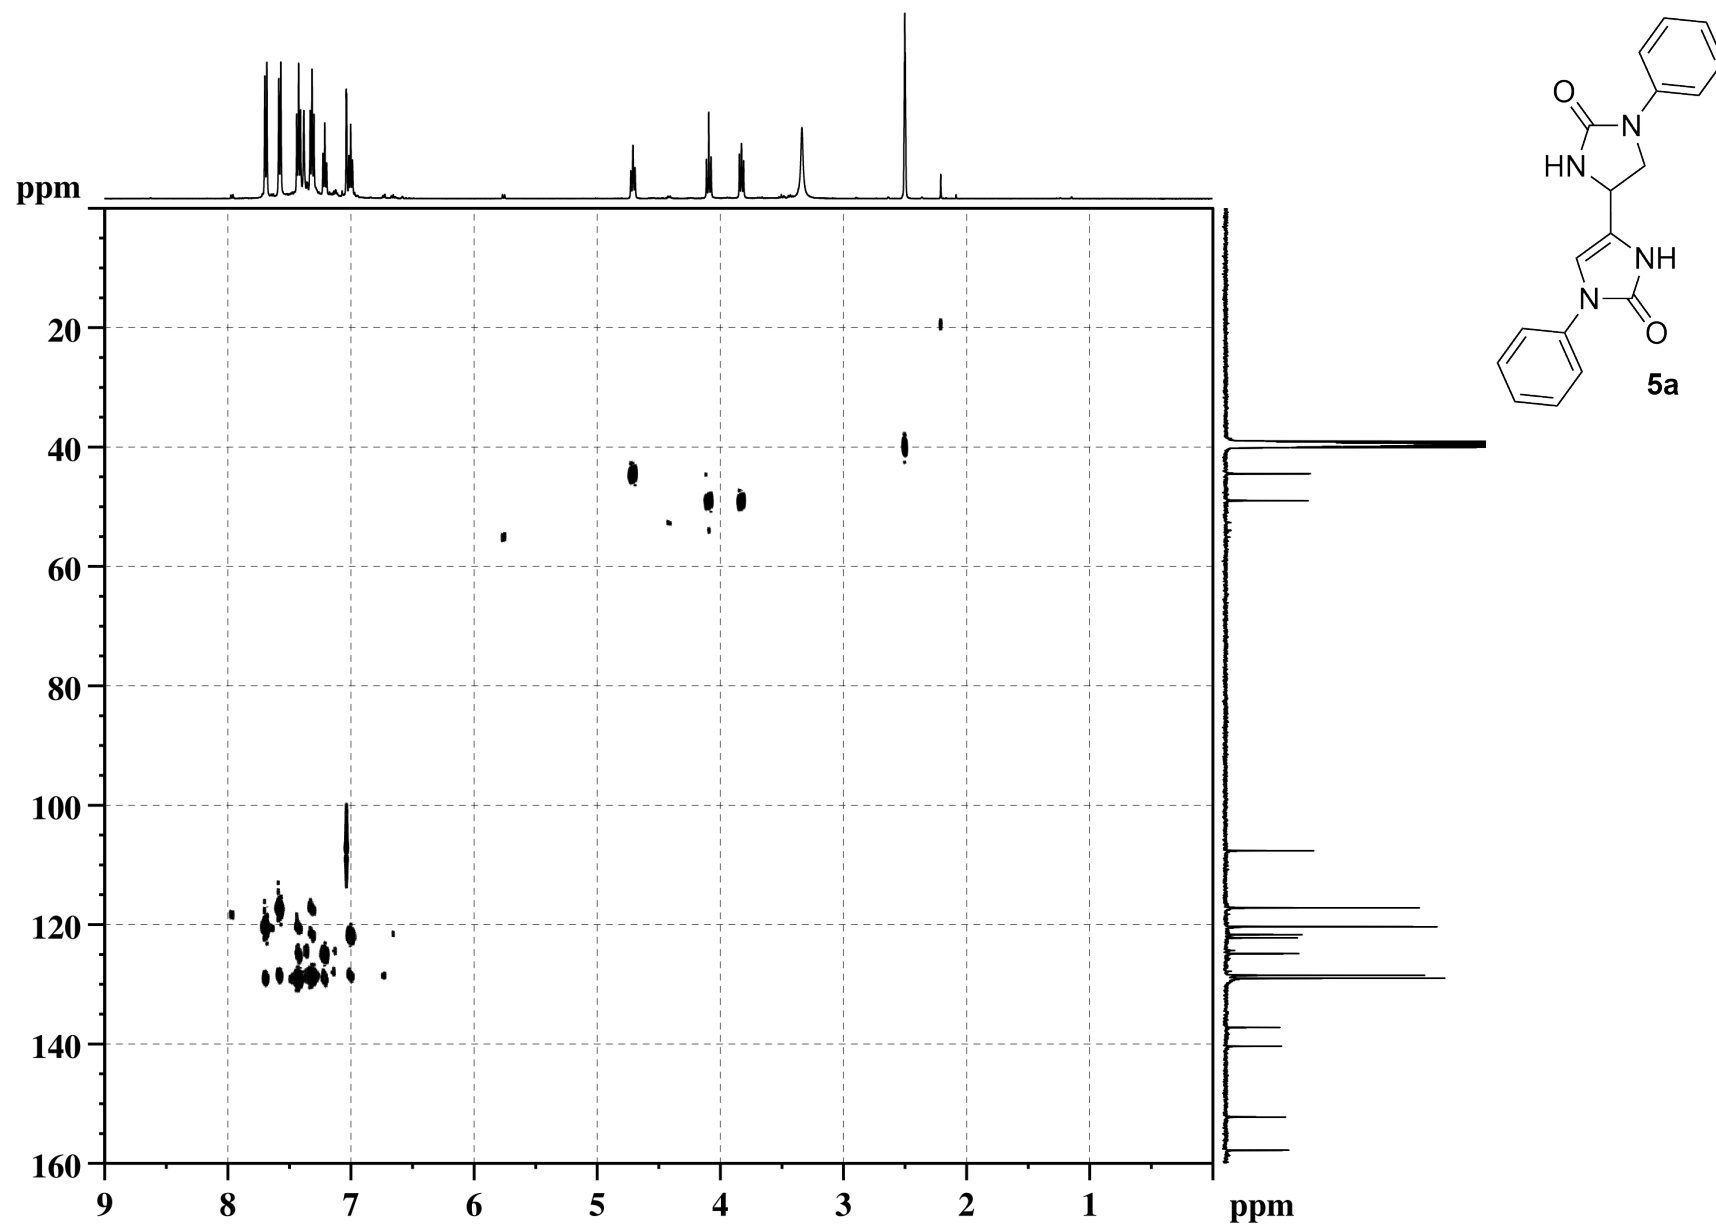

Figure S30.  $^1\text{H}$ - $^{13}\text{C}$  HSQC spectrum ( $(\text{CD}_3)_2\text{SO}$ , 303 K) of the compound 5a

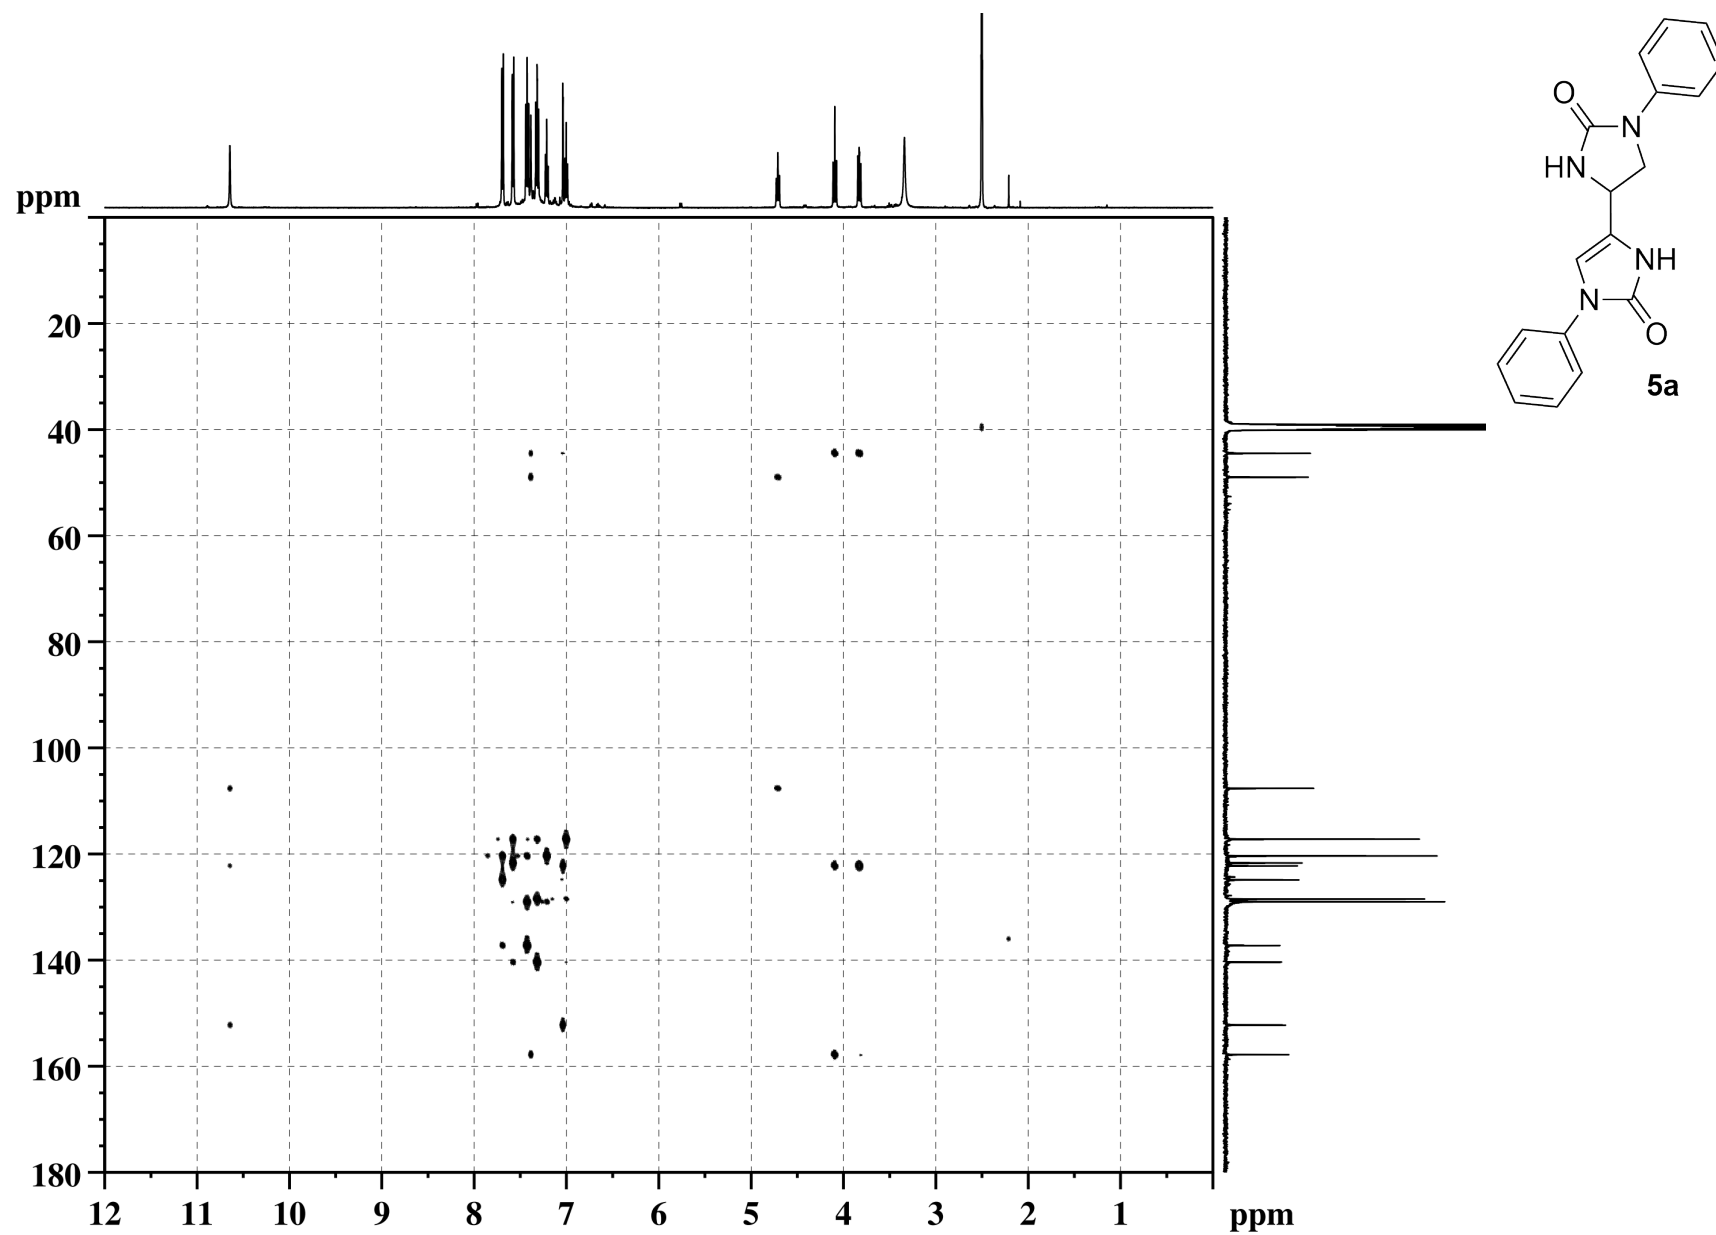

Figure S31.  $^1\text{H}$ - $^{13}\text{C}$  HMBC spectrum ( $(\text{CD}_3)_2\text{SO}$ , 303 K) of the compound 5a

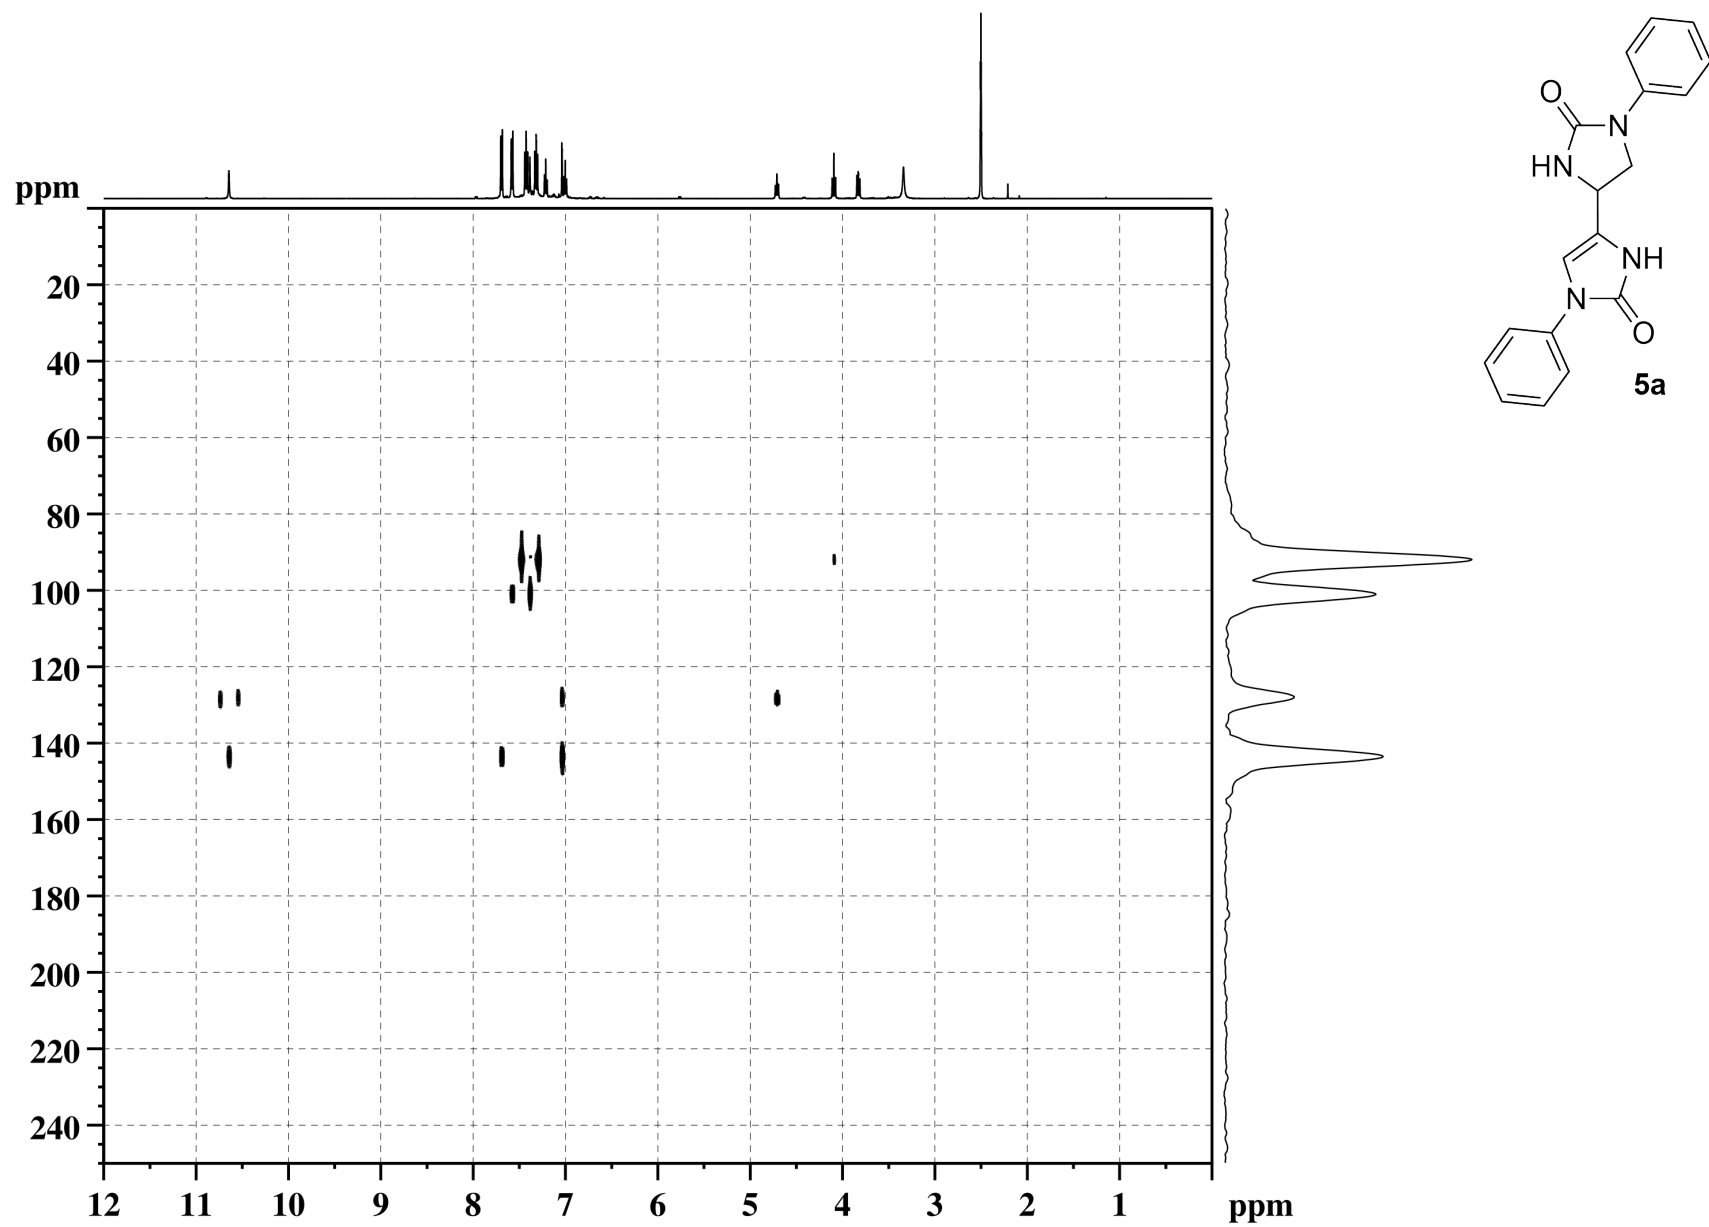

Figure S32.  $^1\text{H}$ - $^{15}\text{N}$  HMBC spectrum ( $(\text{CD}_3)_2\text{SO}$ , 303 K) of the compound 5a

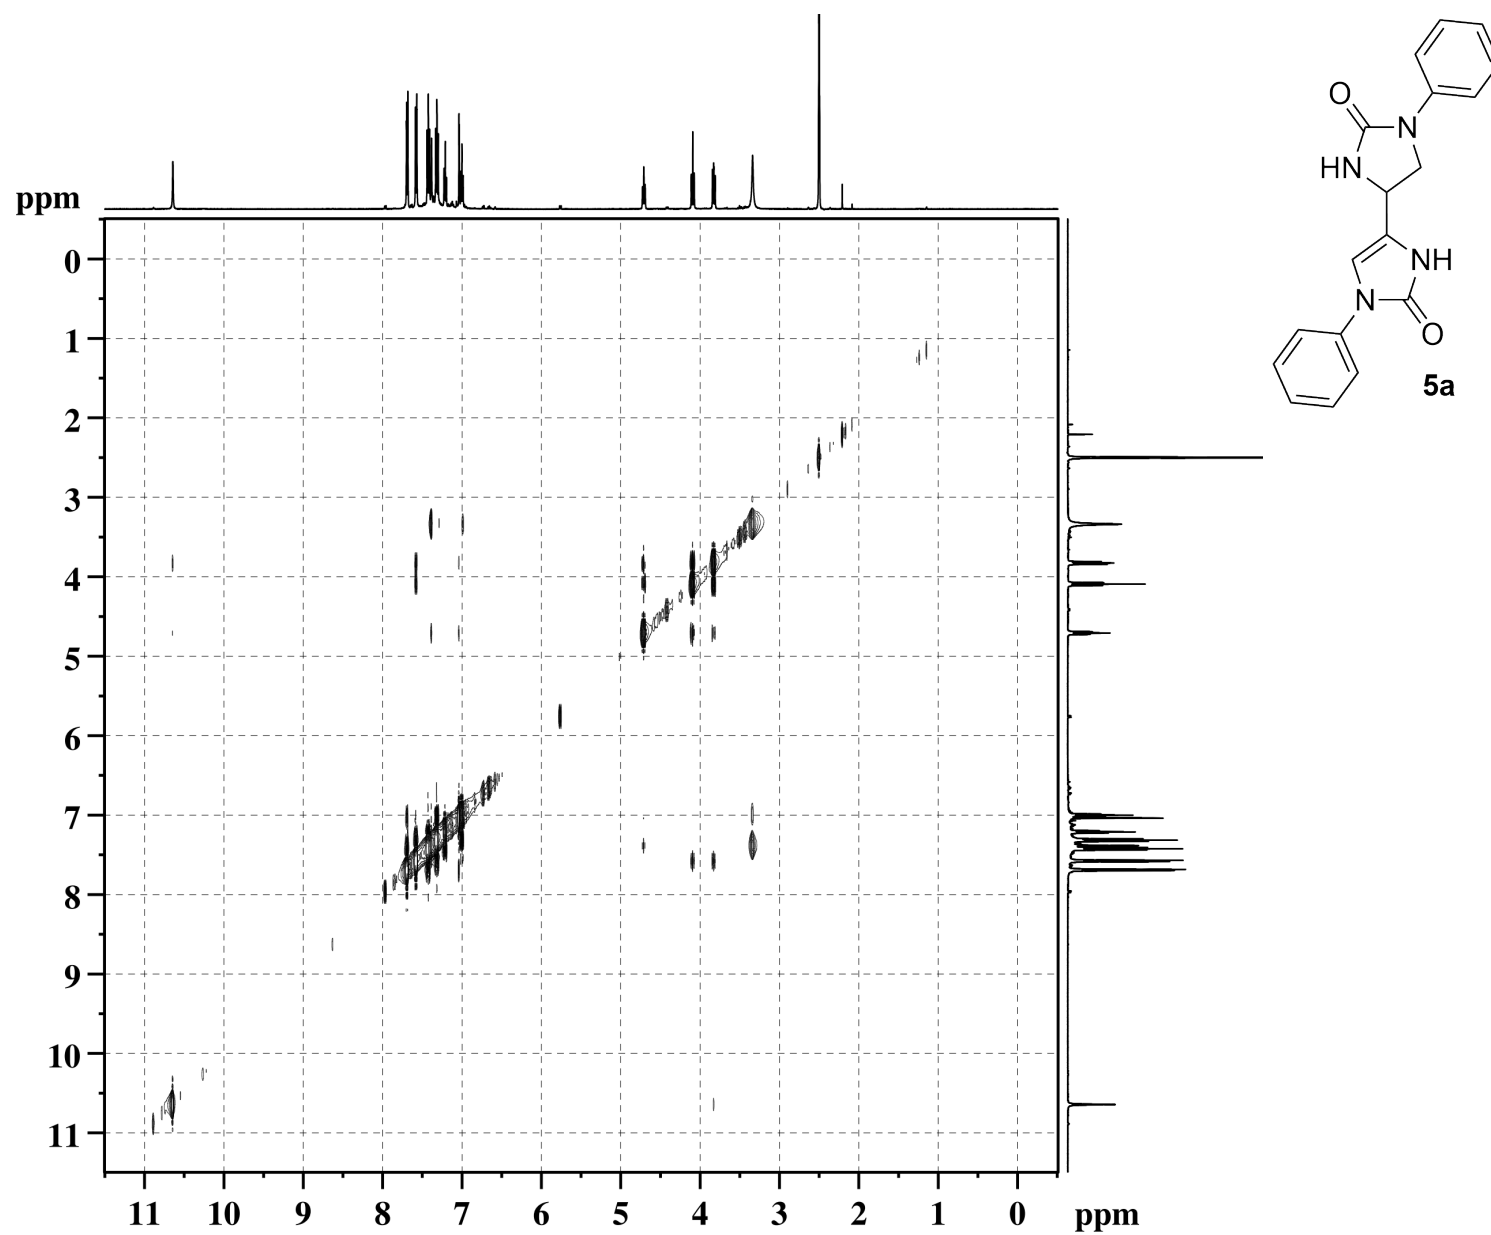

Figure S33. NOESY spectrum ( $(\text{CD}_3)_2\text{SO}$ , 303 K) of the compound 5a

Copies of 1H and 13C NMR spectra

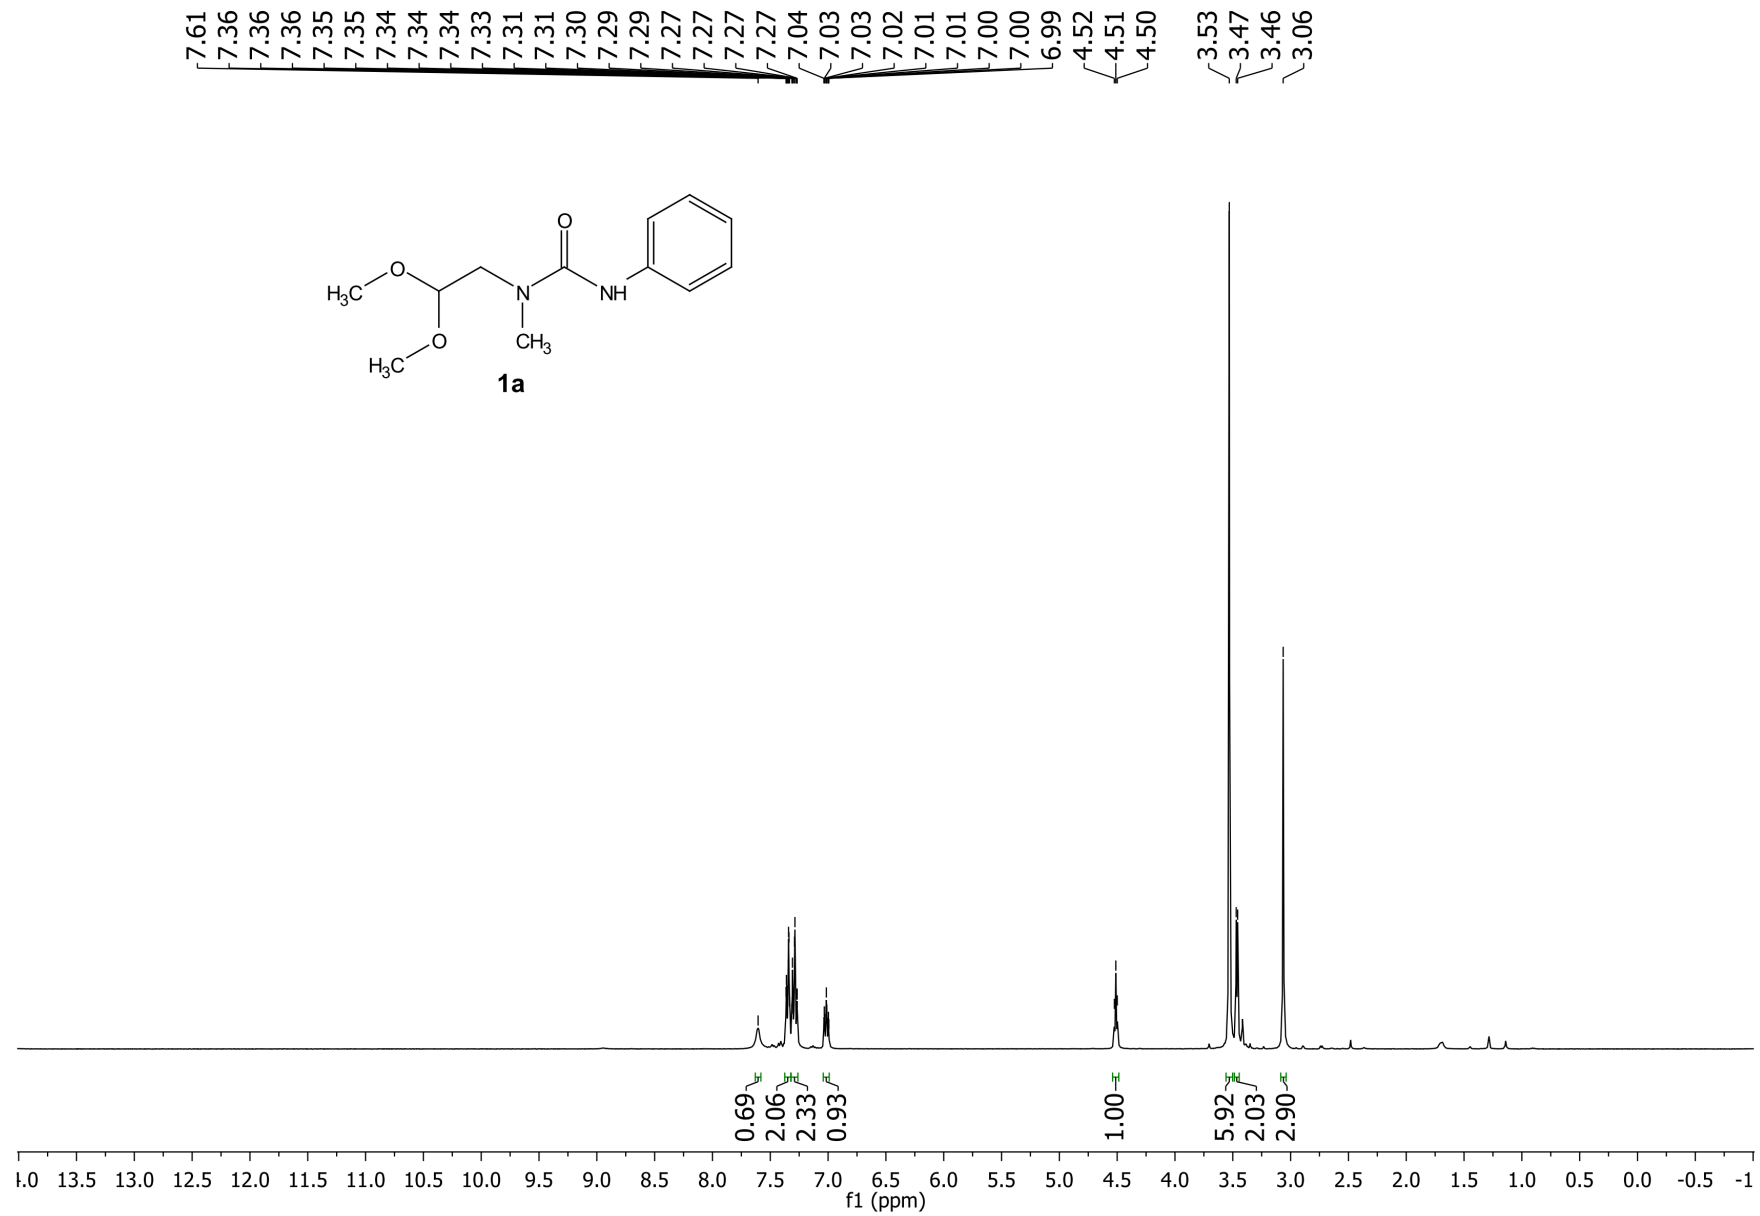

Figure S34. <sup>1</sup>H NMR spectrum (CDCl<sub>3</sub>, 400MHz) of the compound **1a**

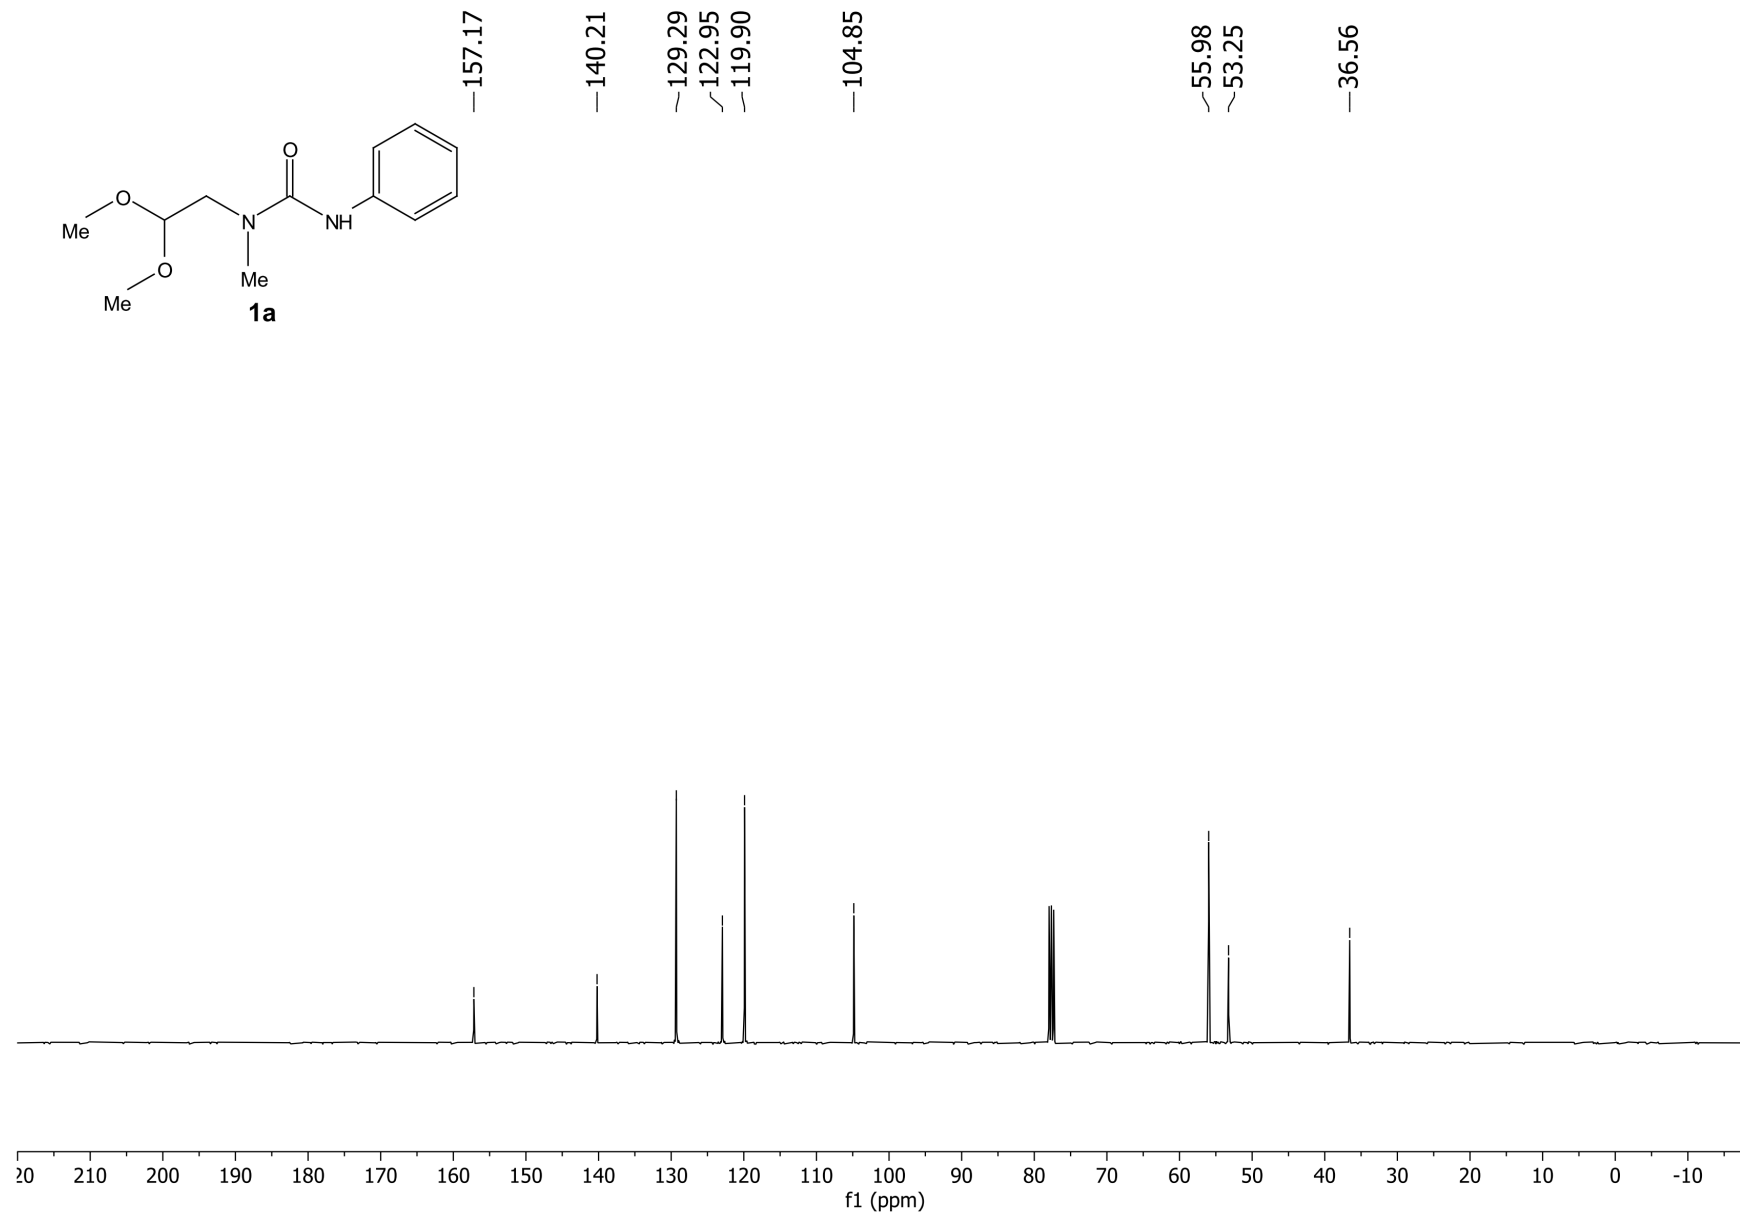

Figure S35.  $^{13}\text{C}$  NMR spectrum (CDCl<sub>3</sub>, 151MHz) of the compound **1a**

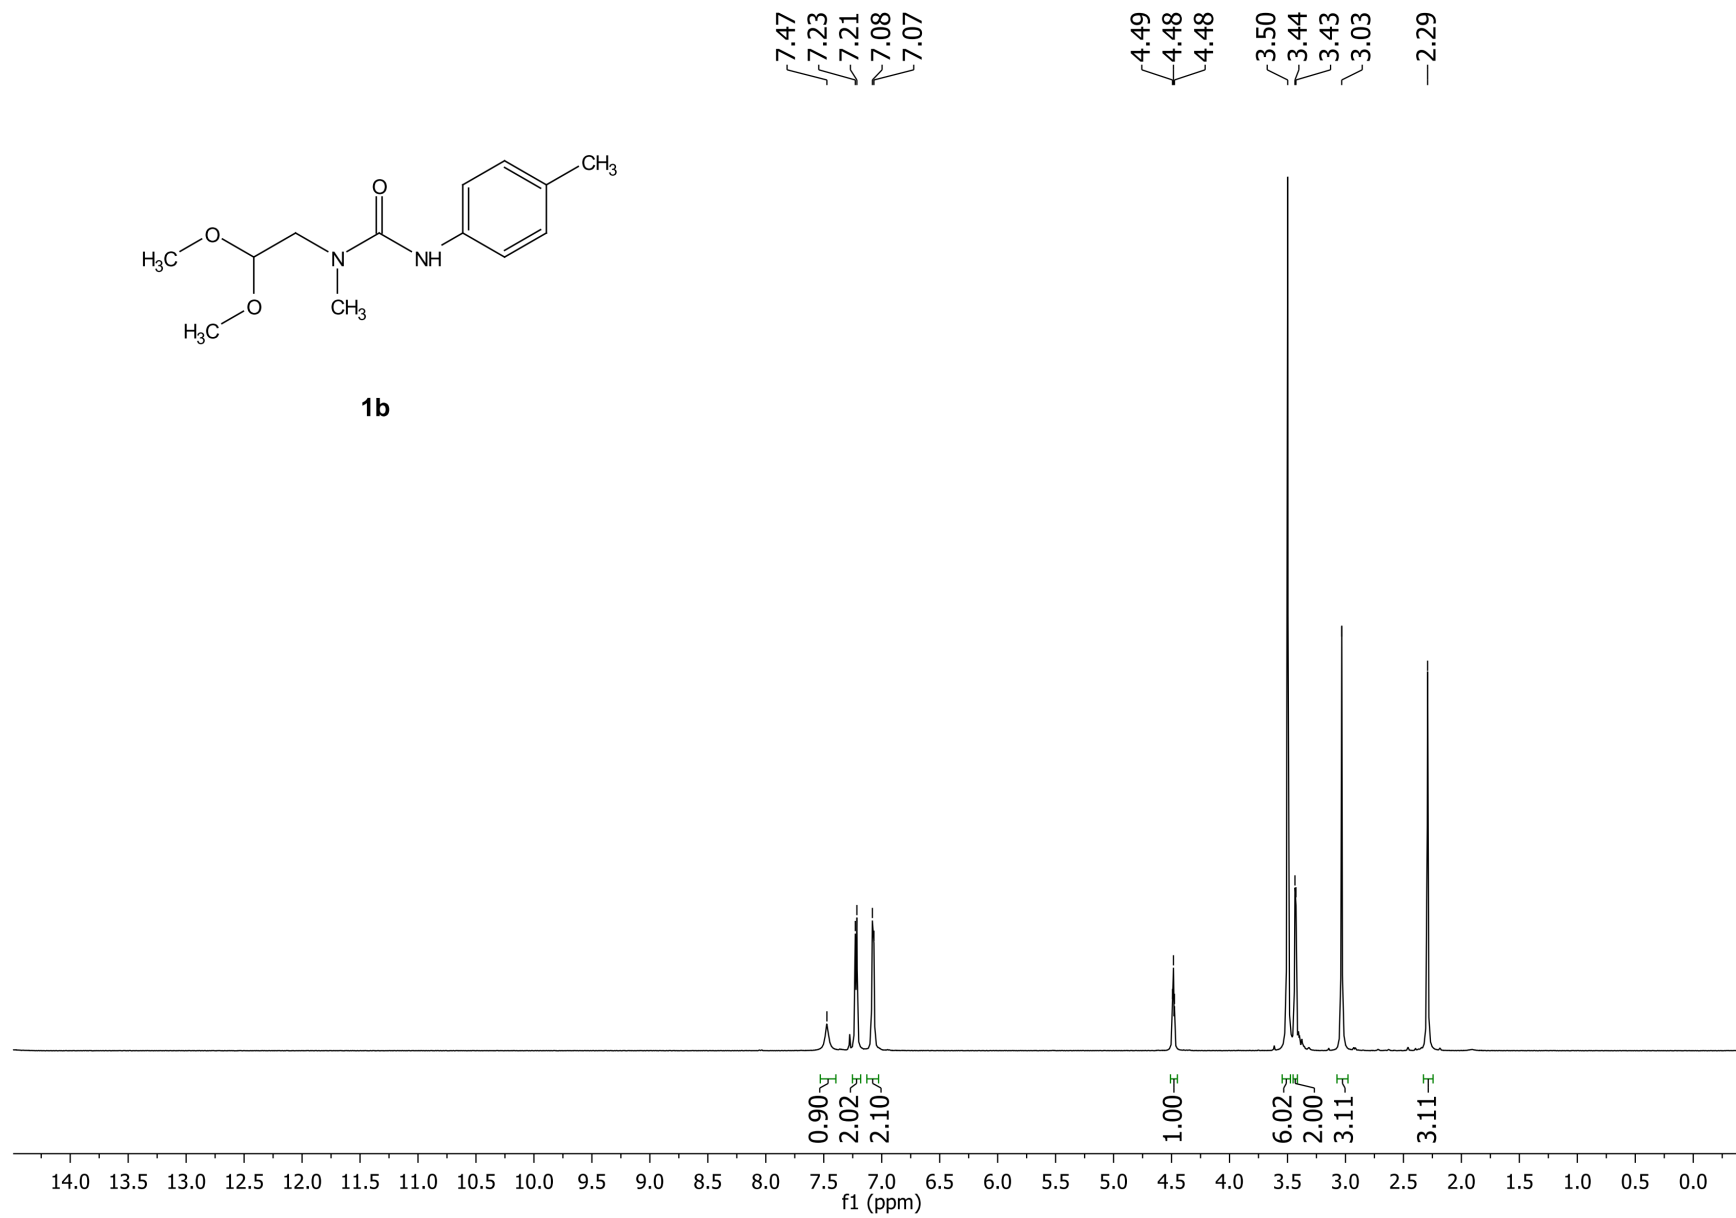

**Figure S36.**  $^1\text{H}$  NMR spectrum (CDCl<sub>3</sub>, 400MHz) of the compound **1b**



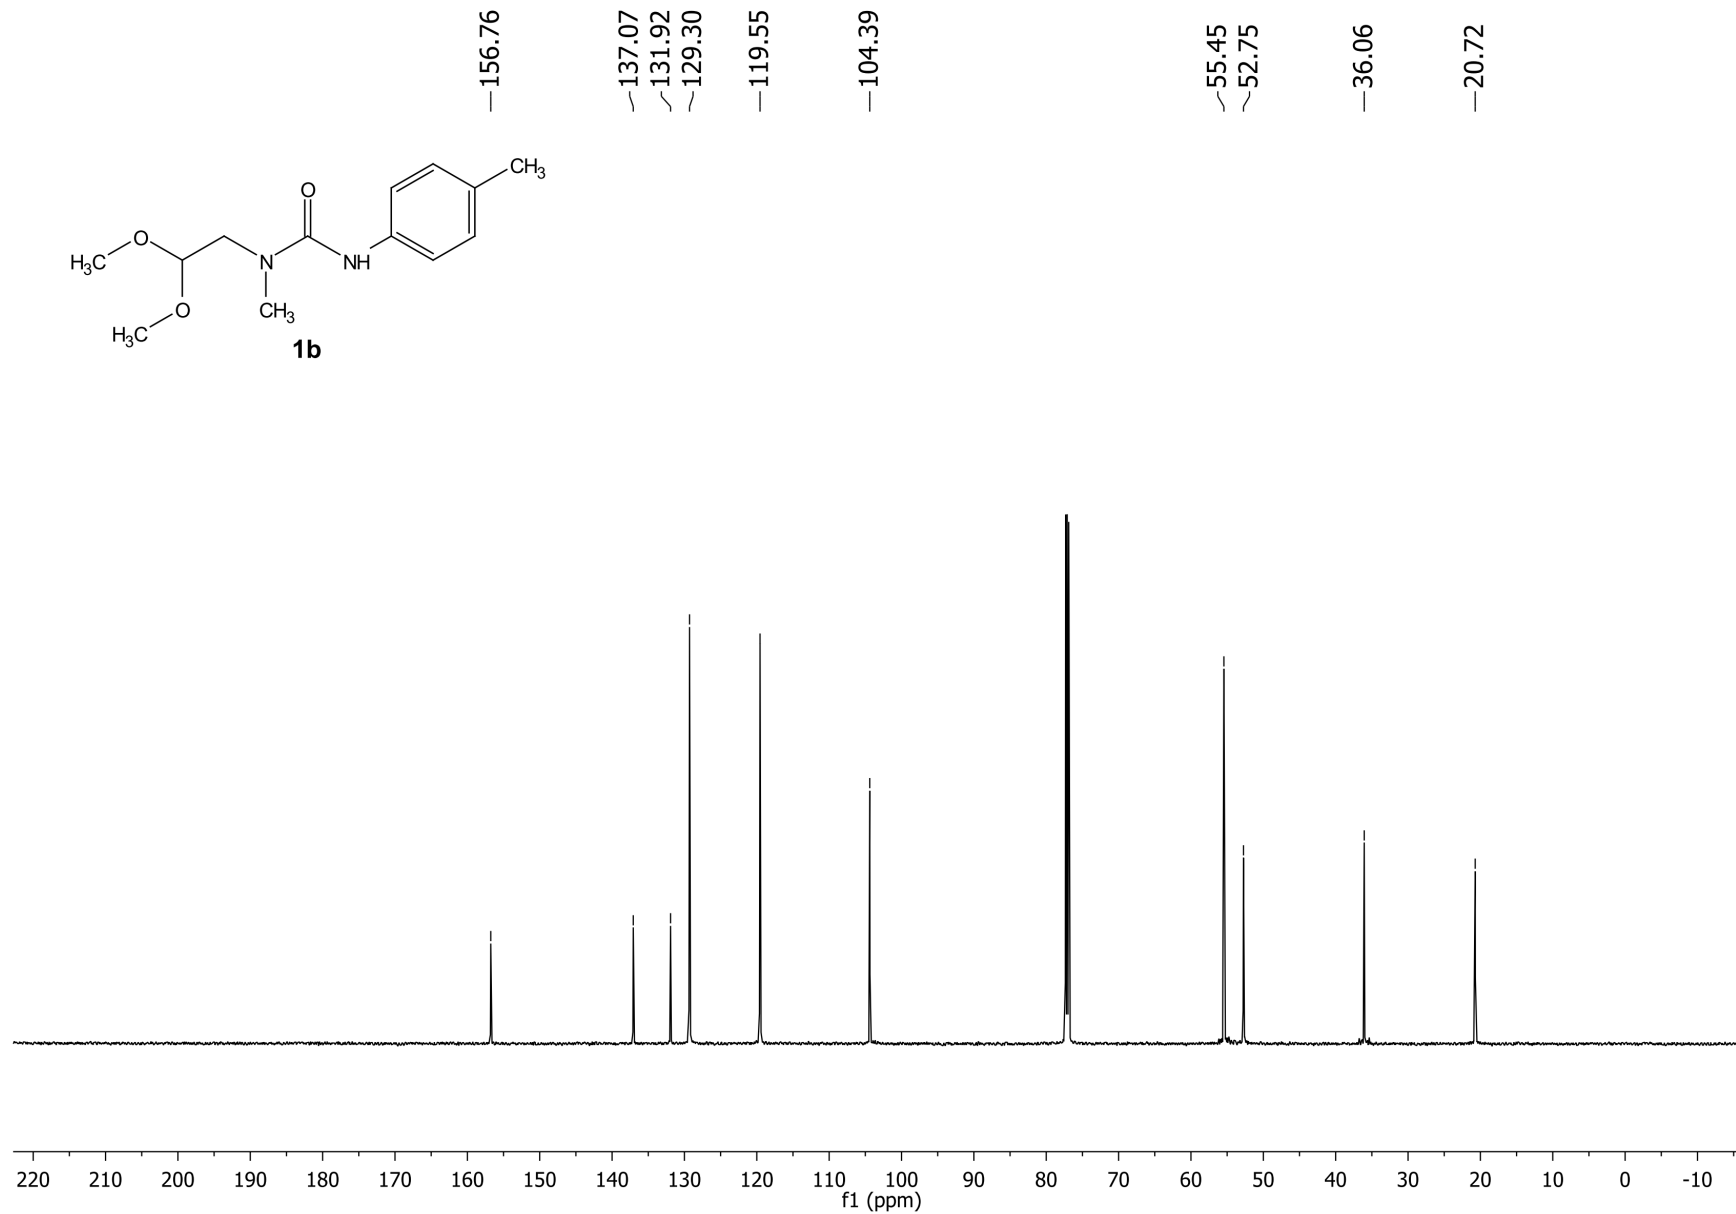

**Figure S37.**  $^{13}\text{C}$  NMR spectrum ( $\text{CDCl}_3$ , 151MHz) of the compound **1b**

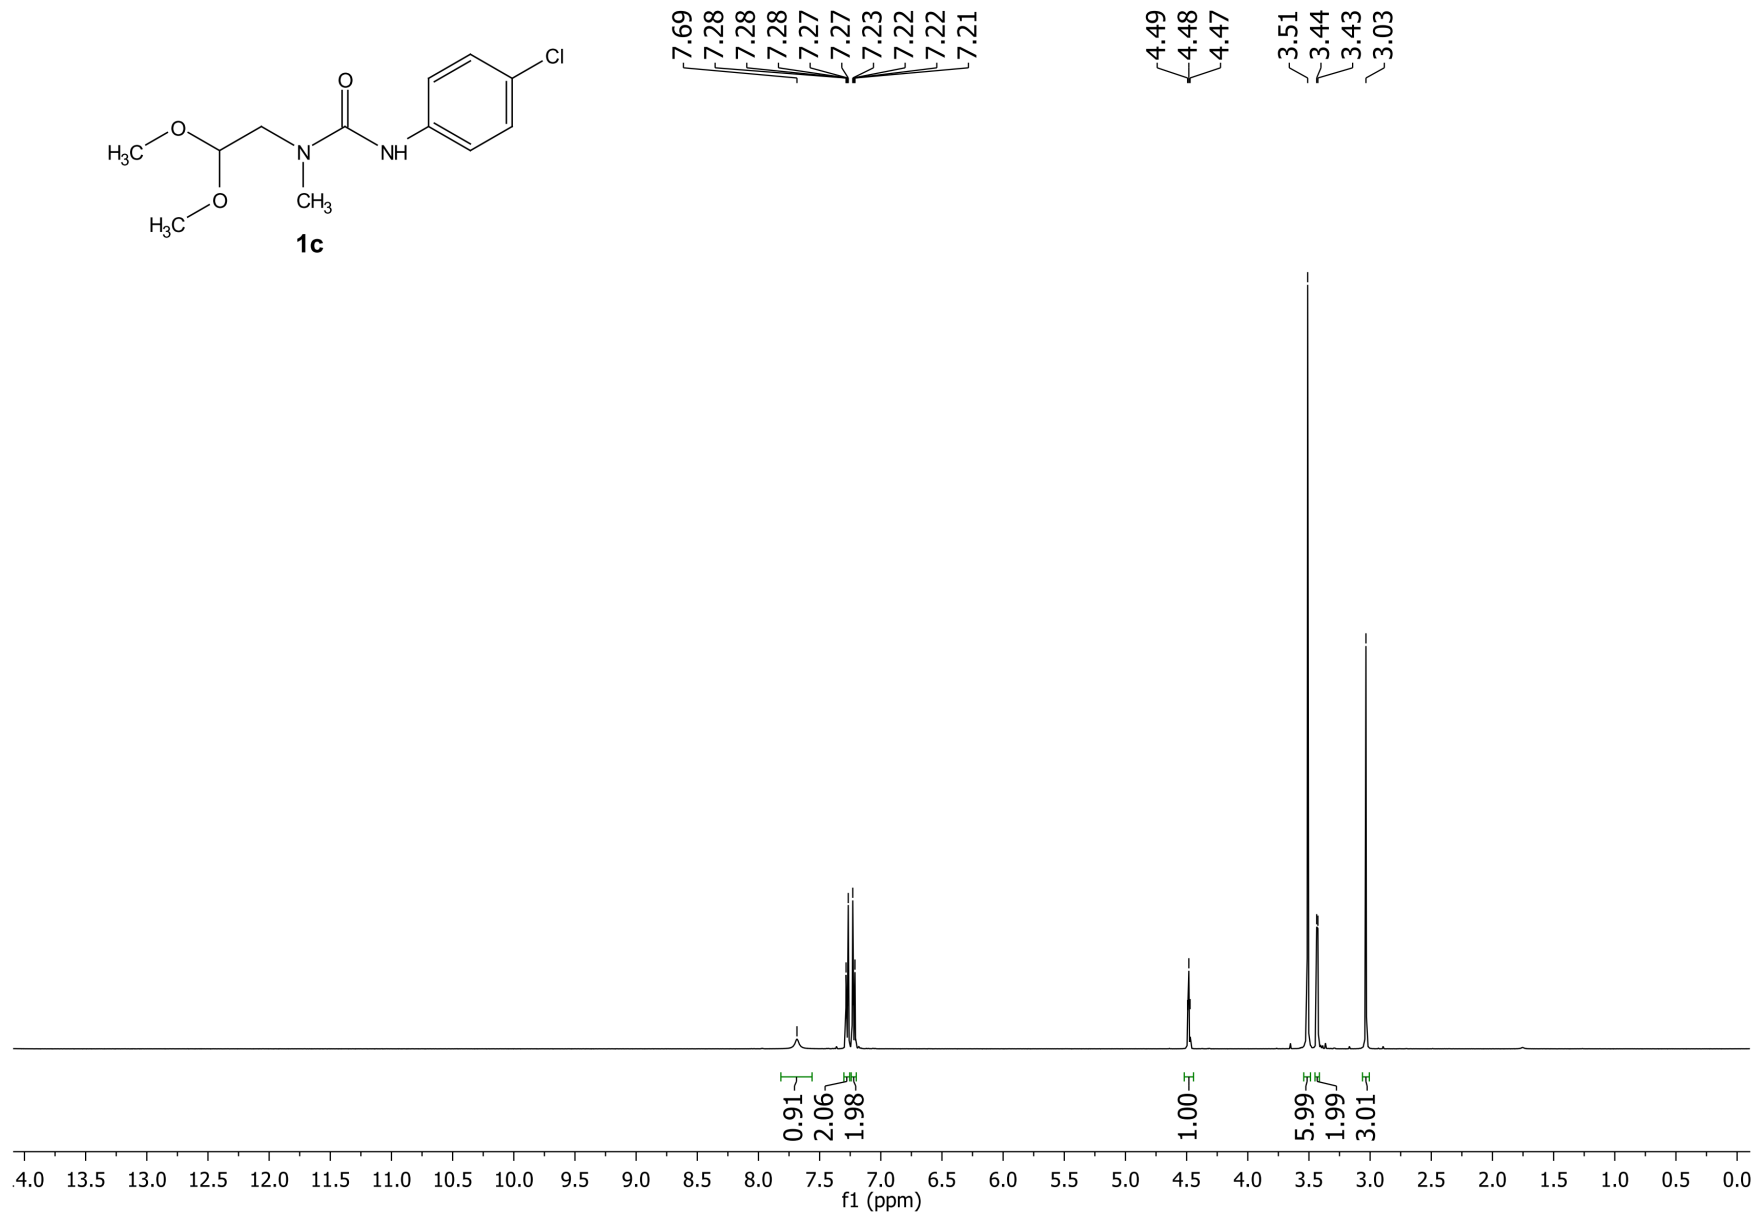

Figure S38.  $^1\text{H}$  NMR spectrum (CDCl<sub>3</sub>, 400MHz) of the compound **1c**

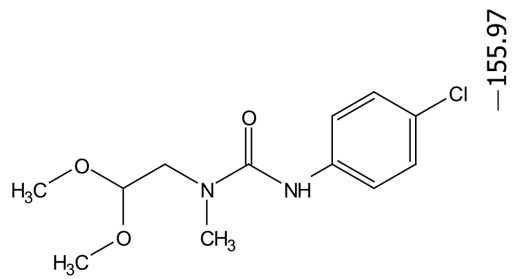

**1c**

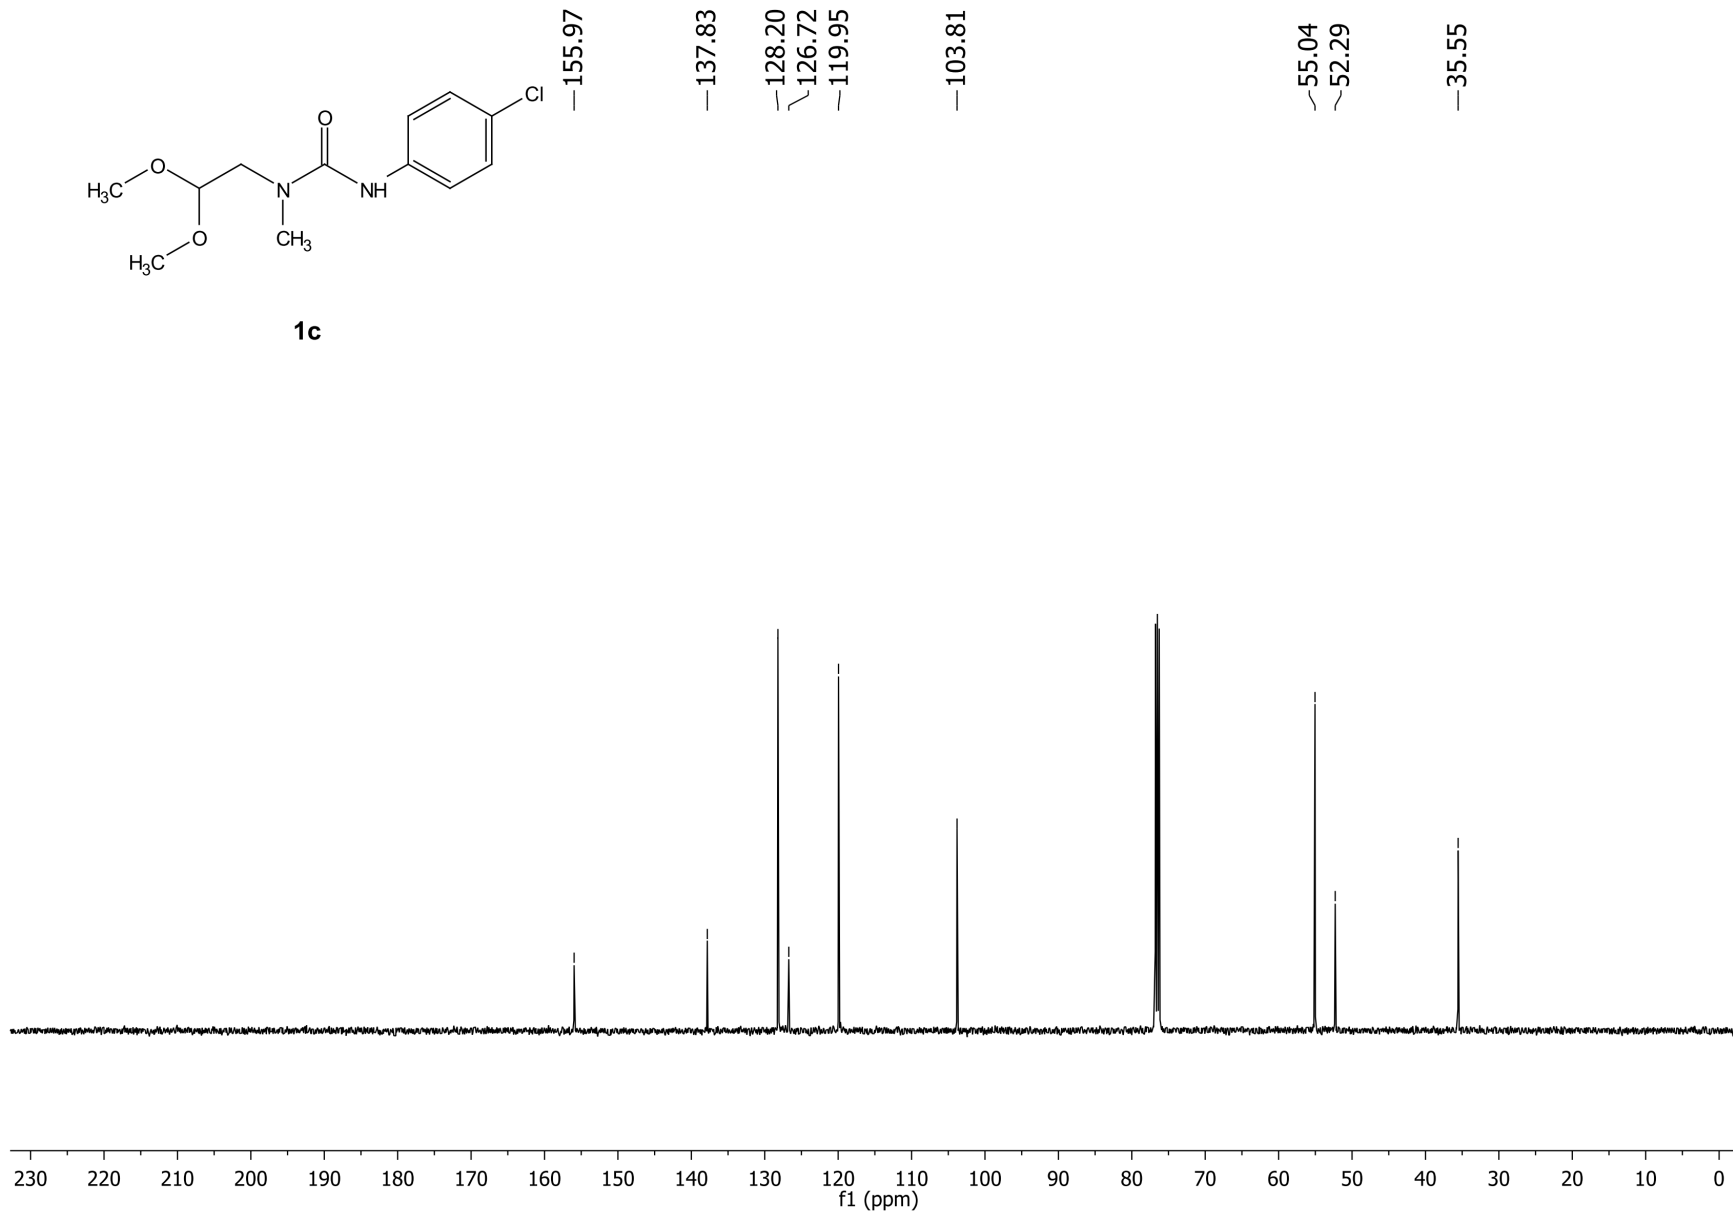

**Figure S39.**  $^{13}\text{C}$  NMR spectrum (CDCl<sub>3</sub>, 151MHz) of the compound **1c**

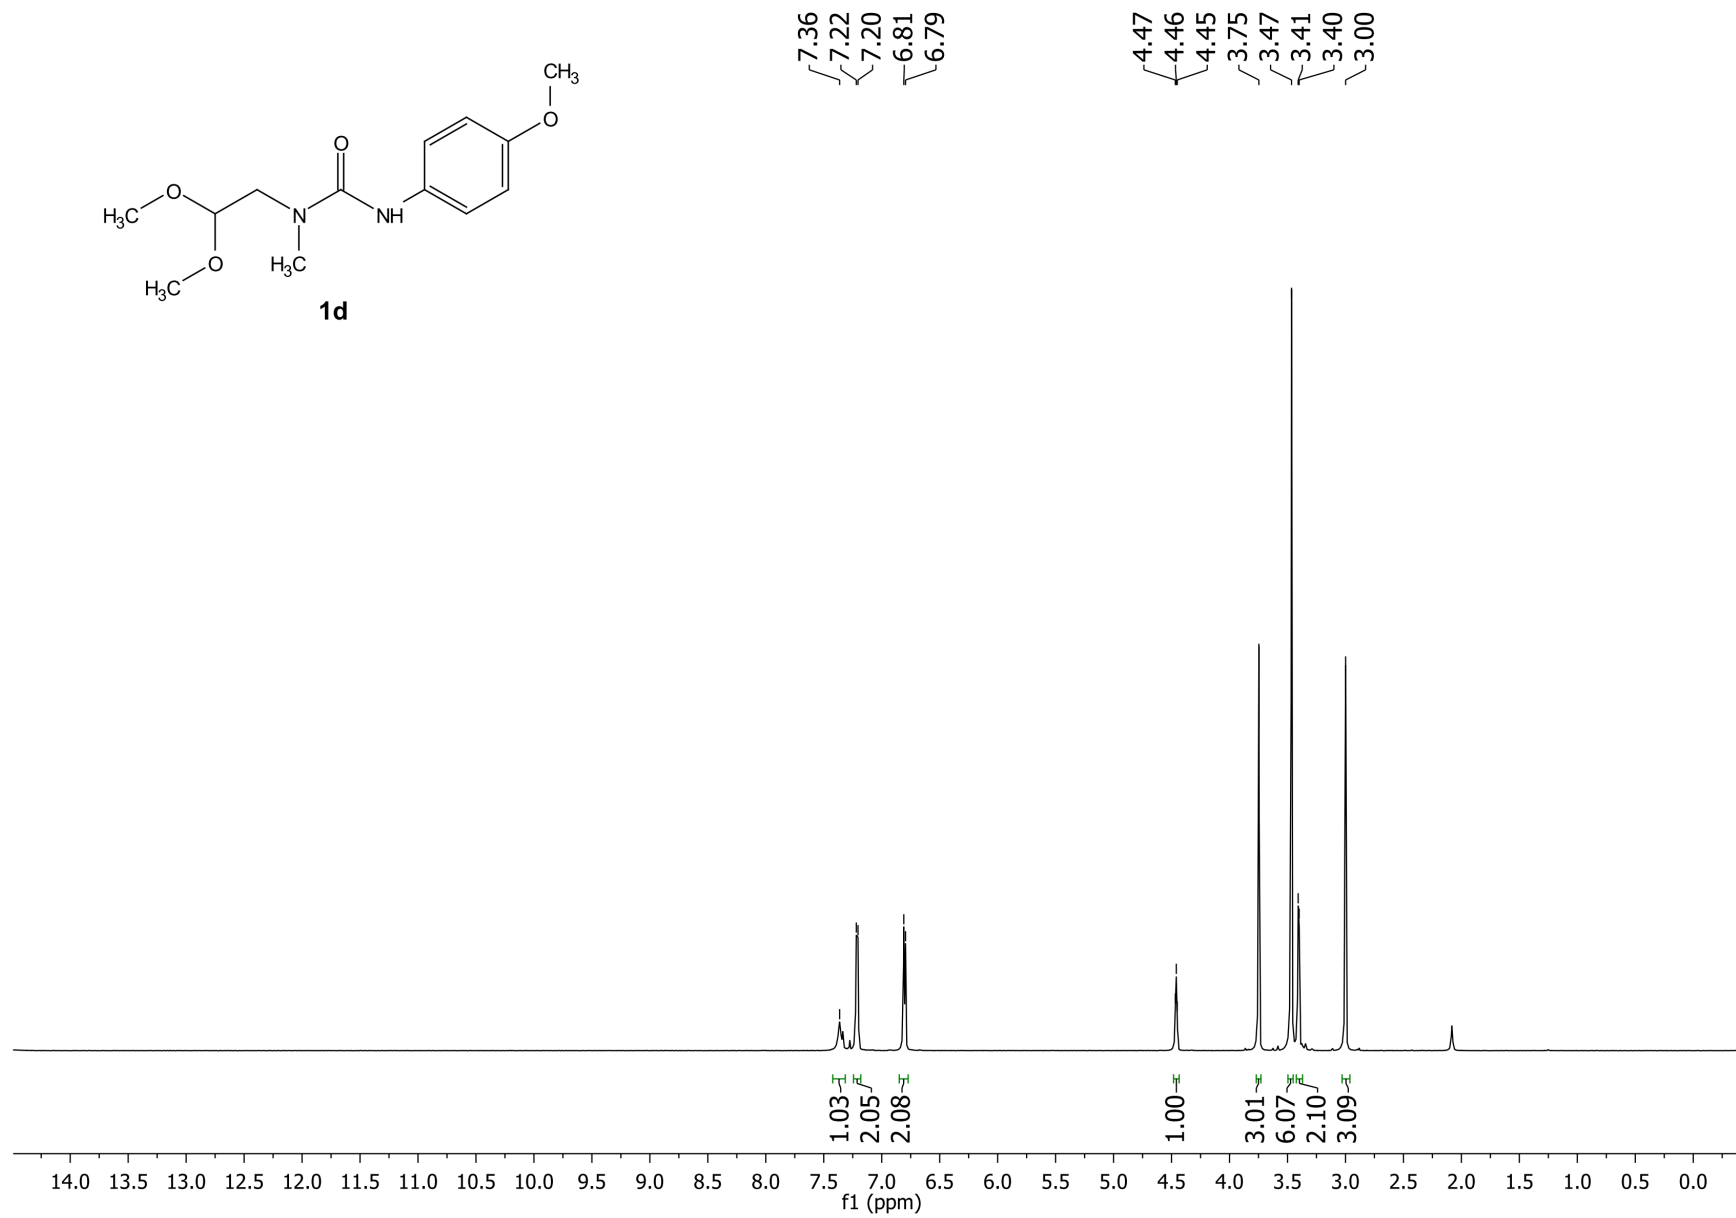

Figure S40. <sup>1</sup>H NMR spectrum (CDCl<sub>3</sub>, 400MHz) of the compound **1d**

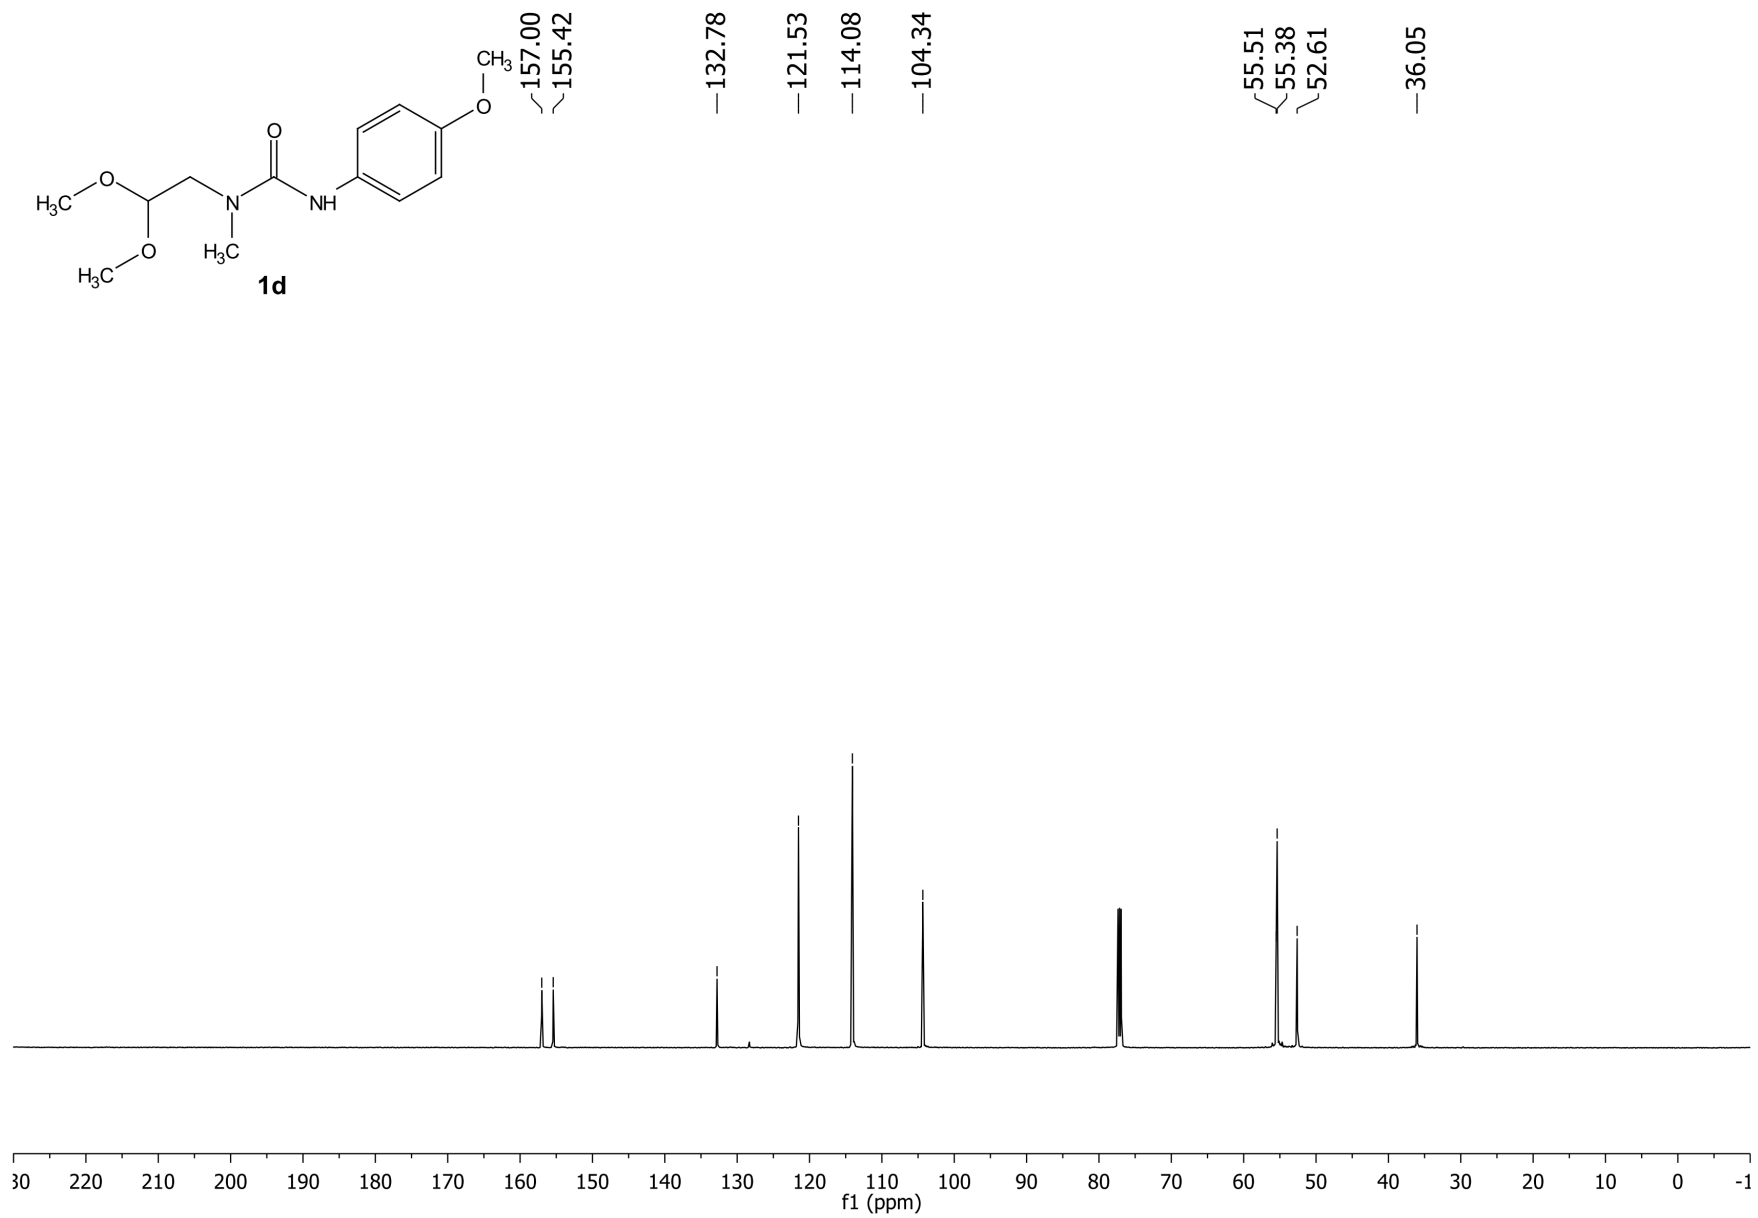

**Figure S41.** <sup>13</sup>C NMR spectrum (CDCl<sub>3</sub>, 151MHz) of the compound **1d**

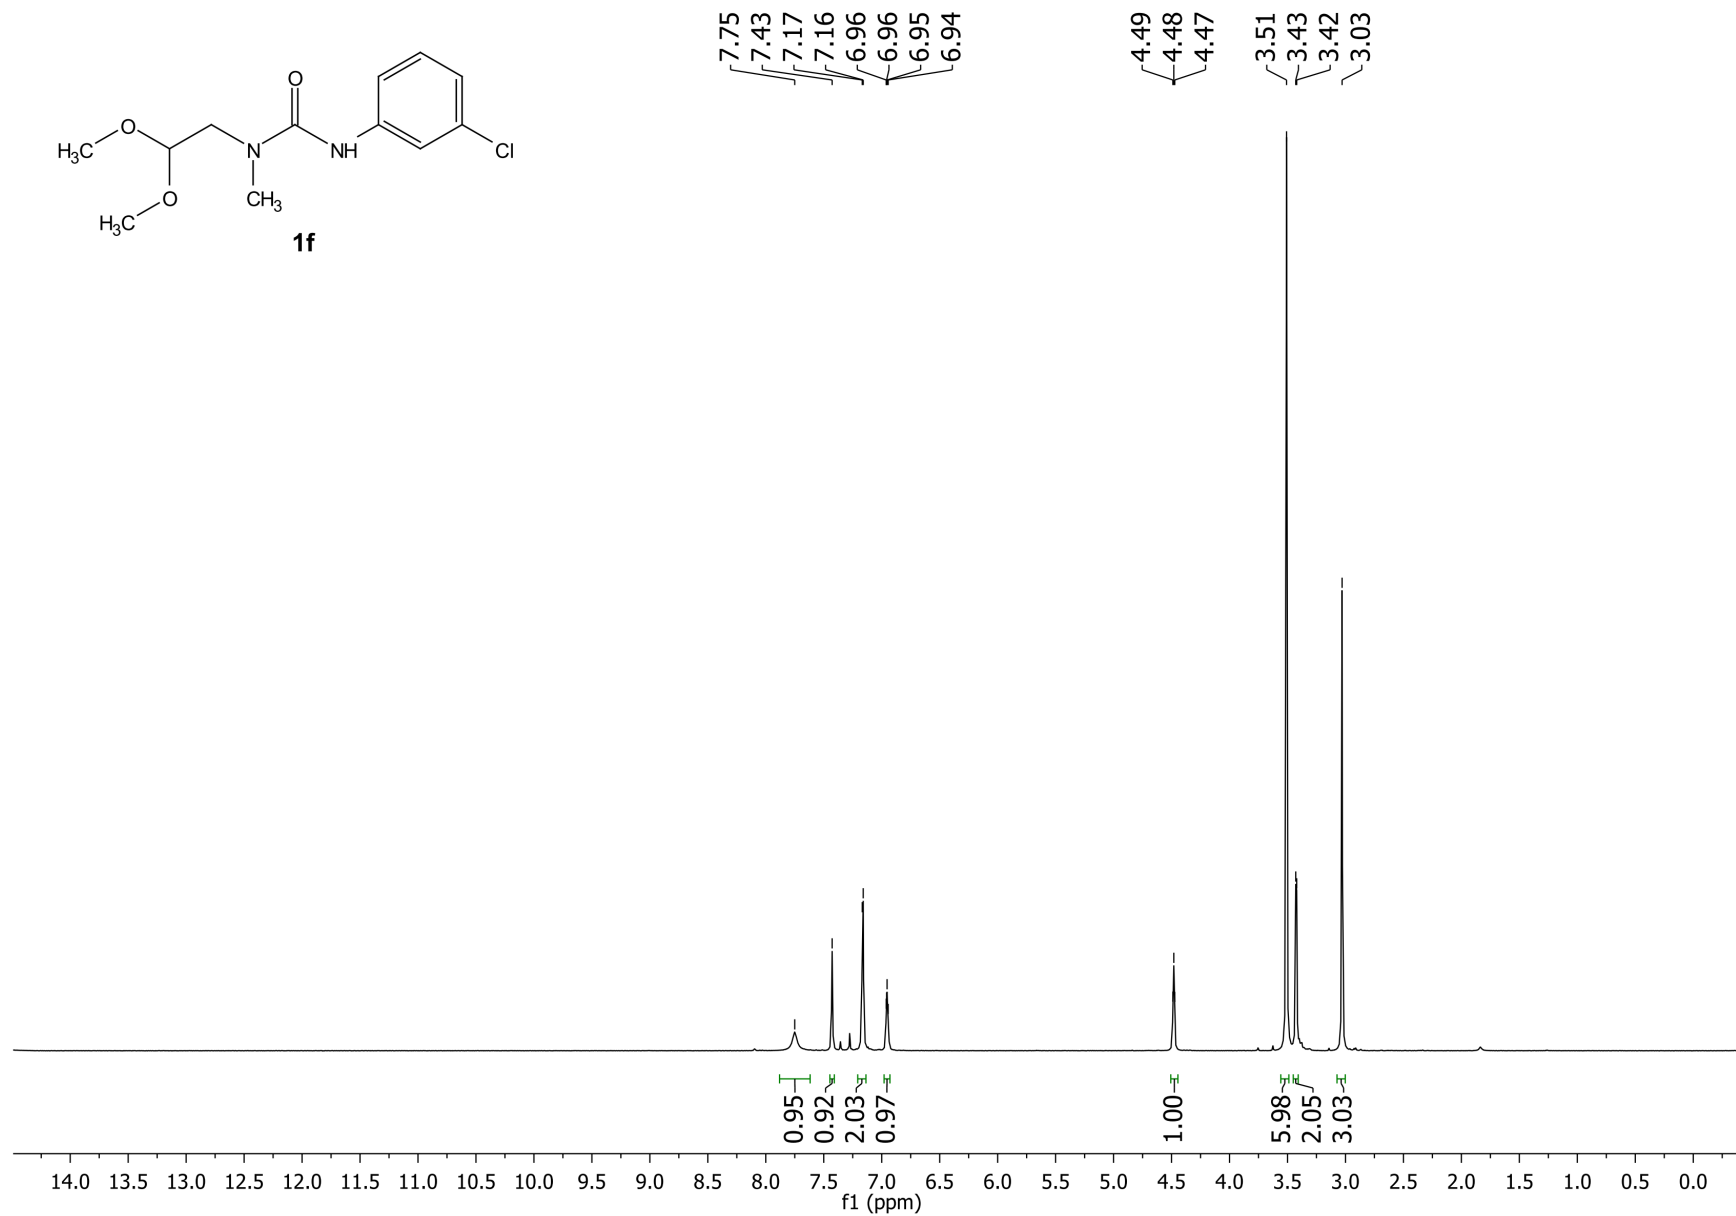

Figure S42. <sup>1</sup>H NMR spectrum (CDCl<sub>3</sub>, 400MHz) of the compound **1f**

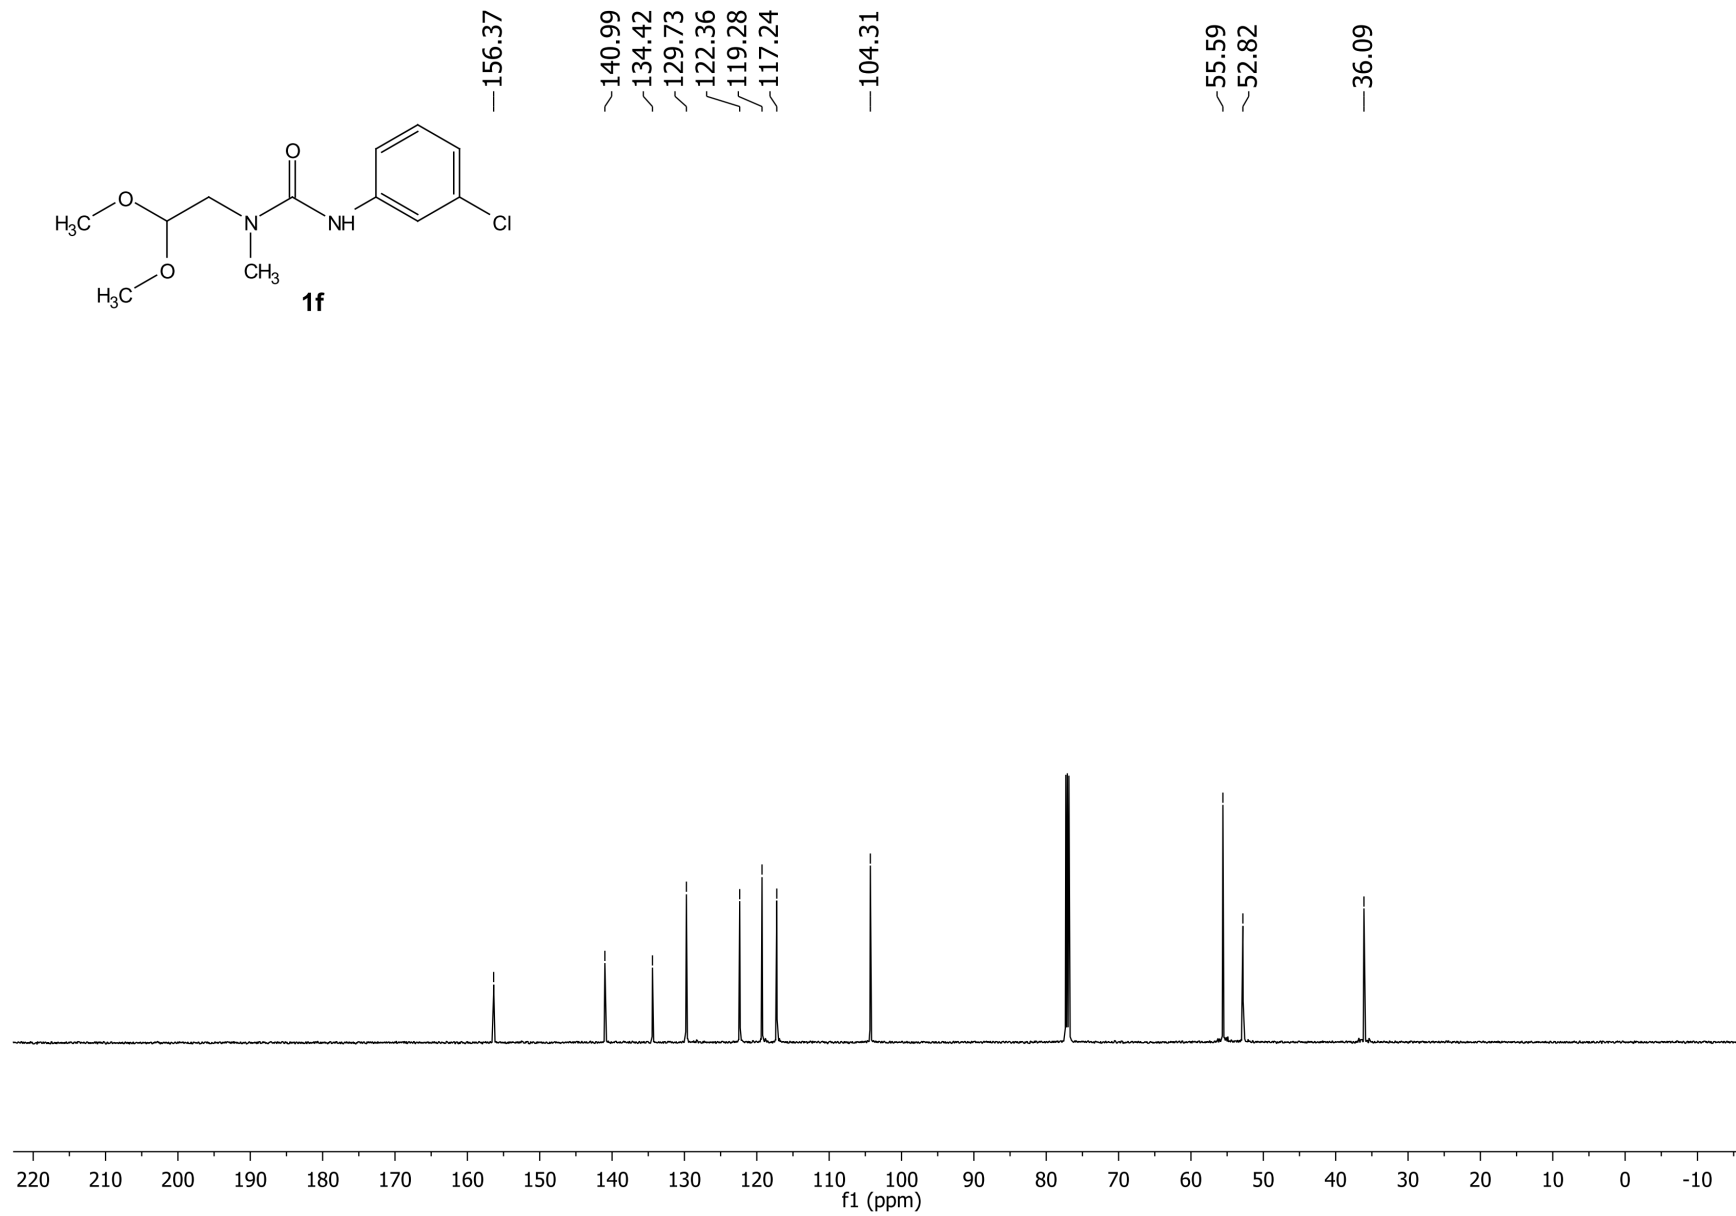

**Figure S43.**  $^{13}\text{C}$  NMR spectrum ( $\text{CDCl}_3$ , 151MHz) of the compound **1f**

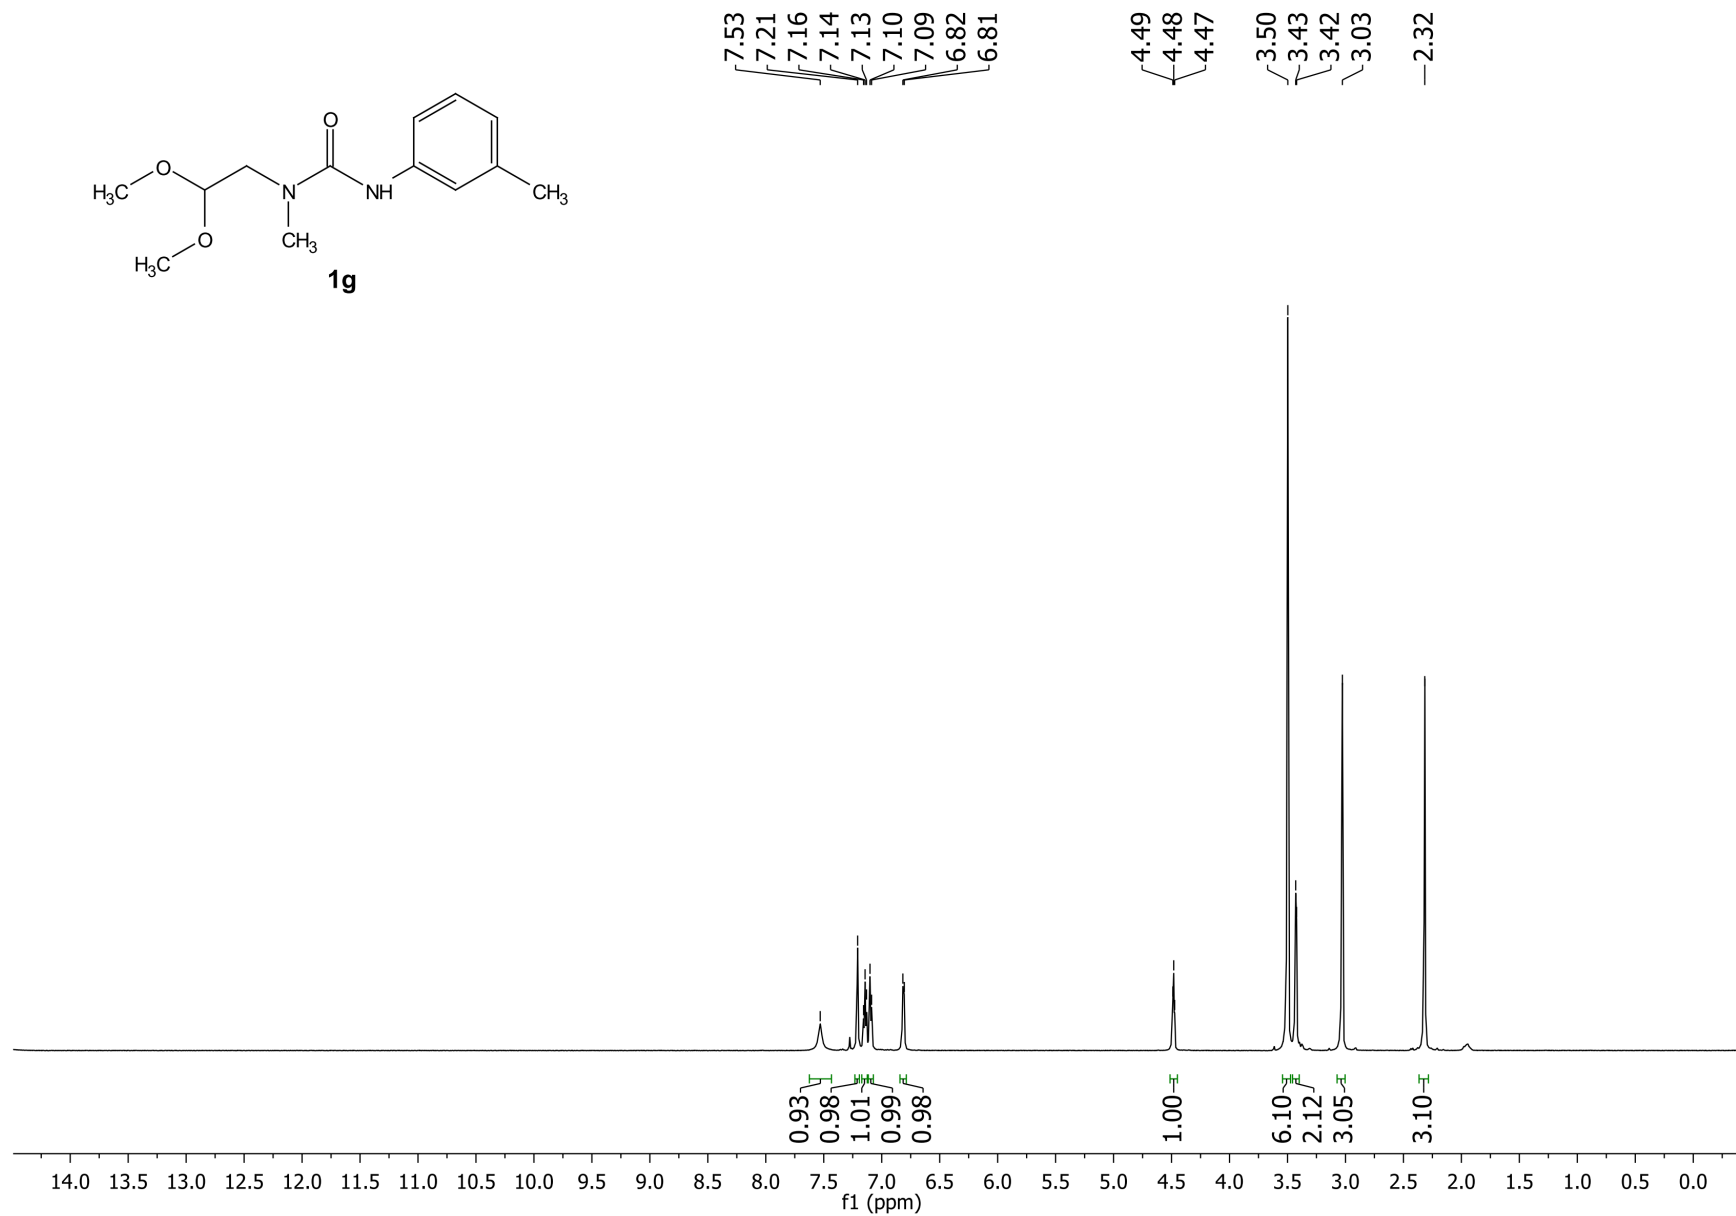

**Figure S44.**  $^1\text{H}$  NMR spectrum ( $\text{CDCl}_3$ , 400MHz) of the compound **1g**



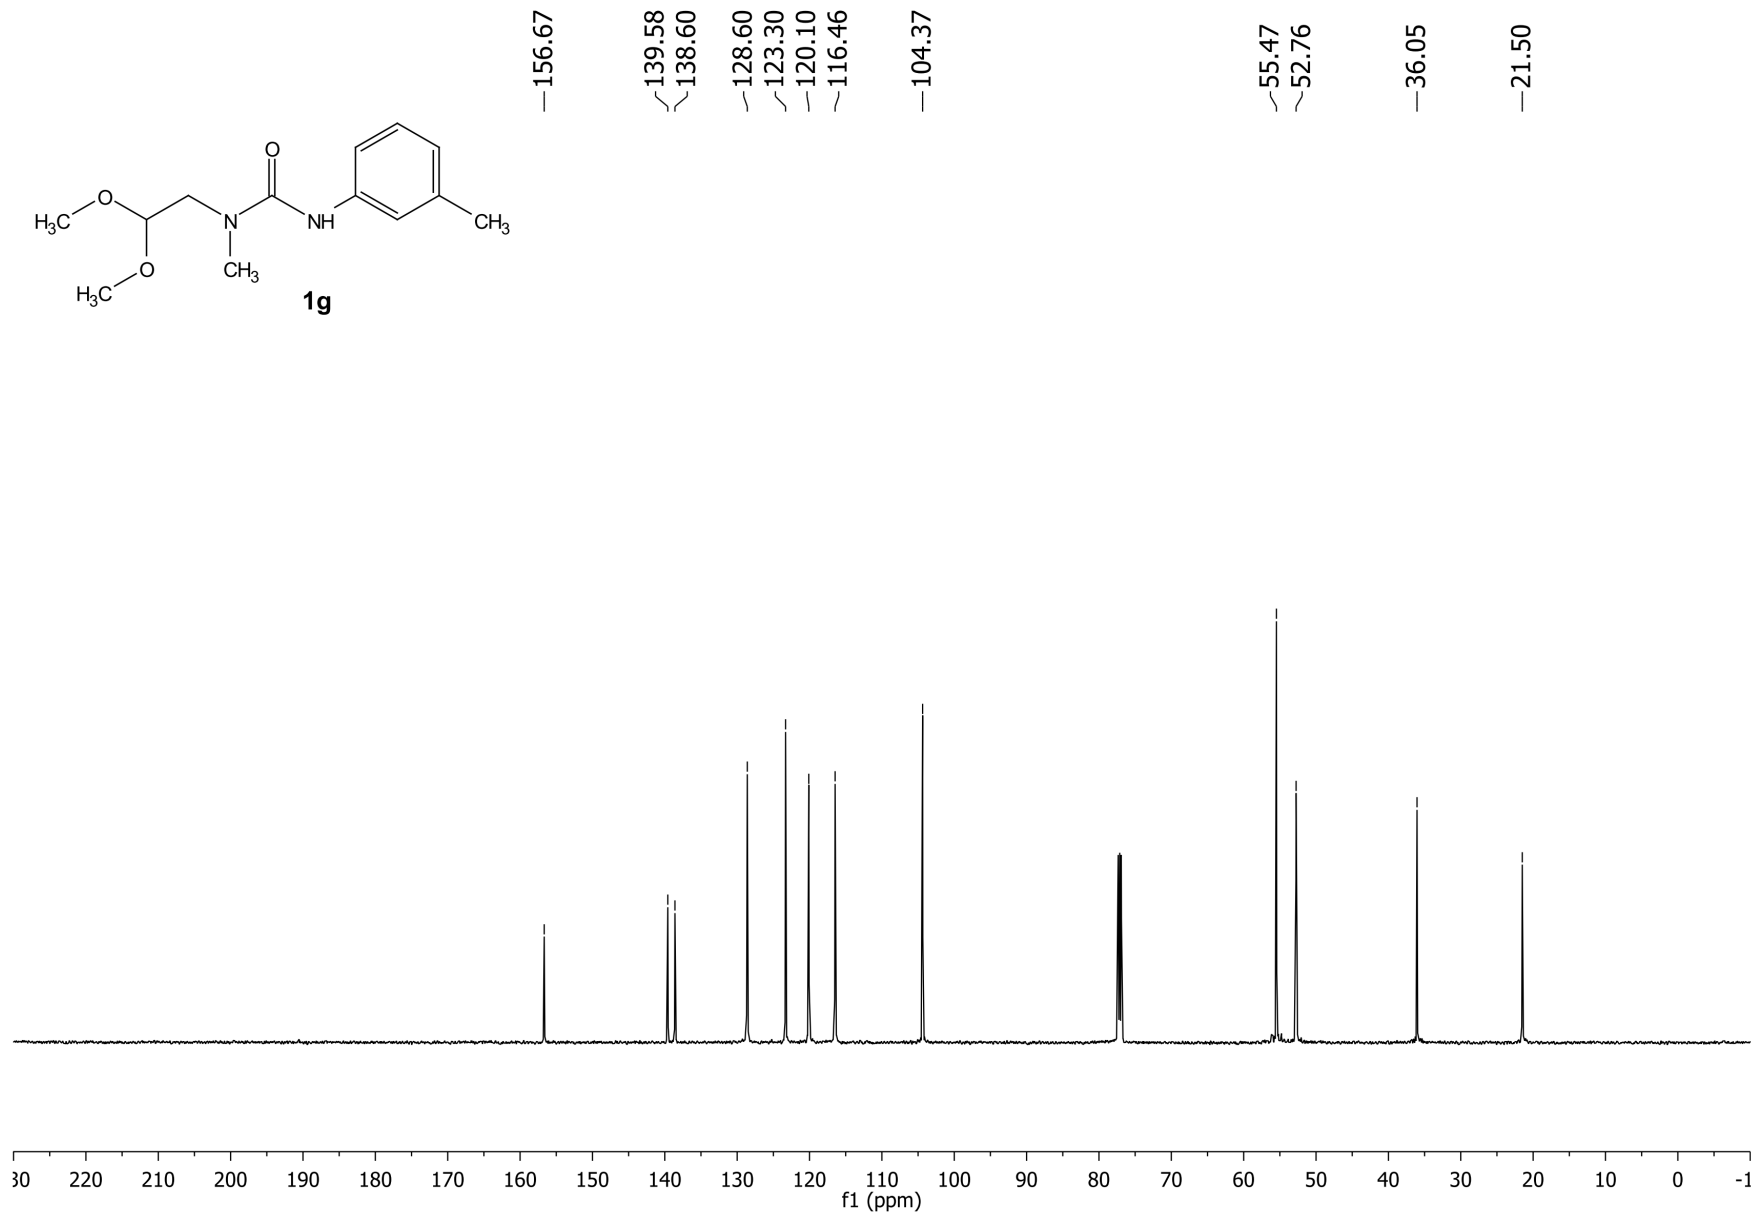

**Figure S45.**  $^{13}\text{C}$  NMR spectrum ( $\text{CDCl}_3$ , 151MHz) of the compound **1g**

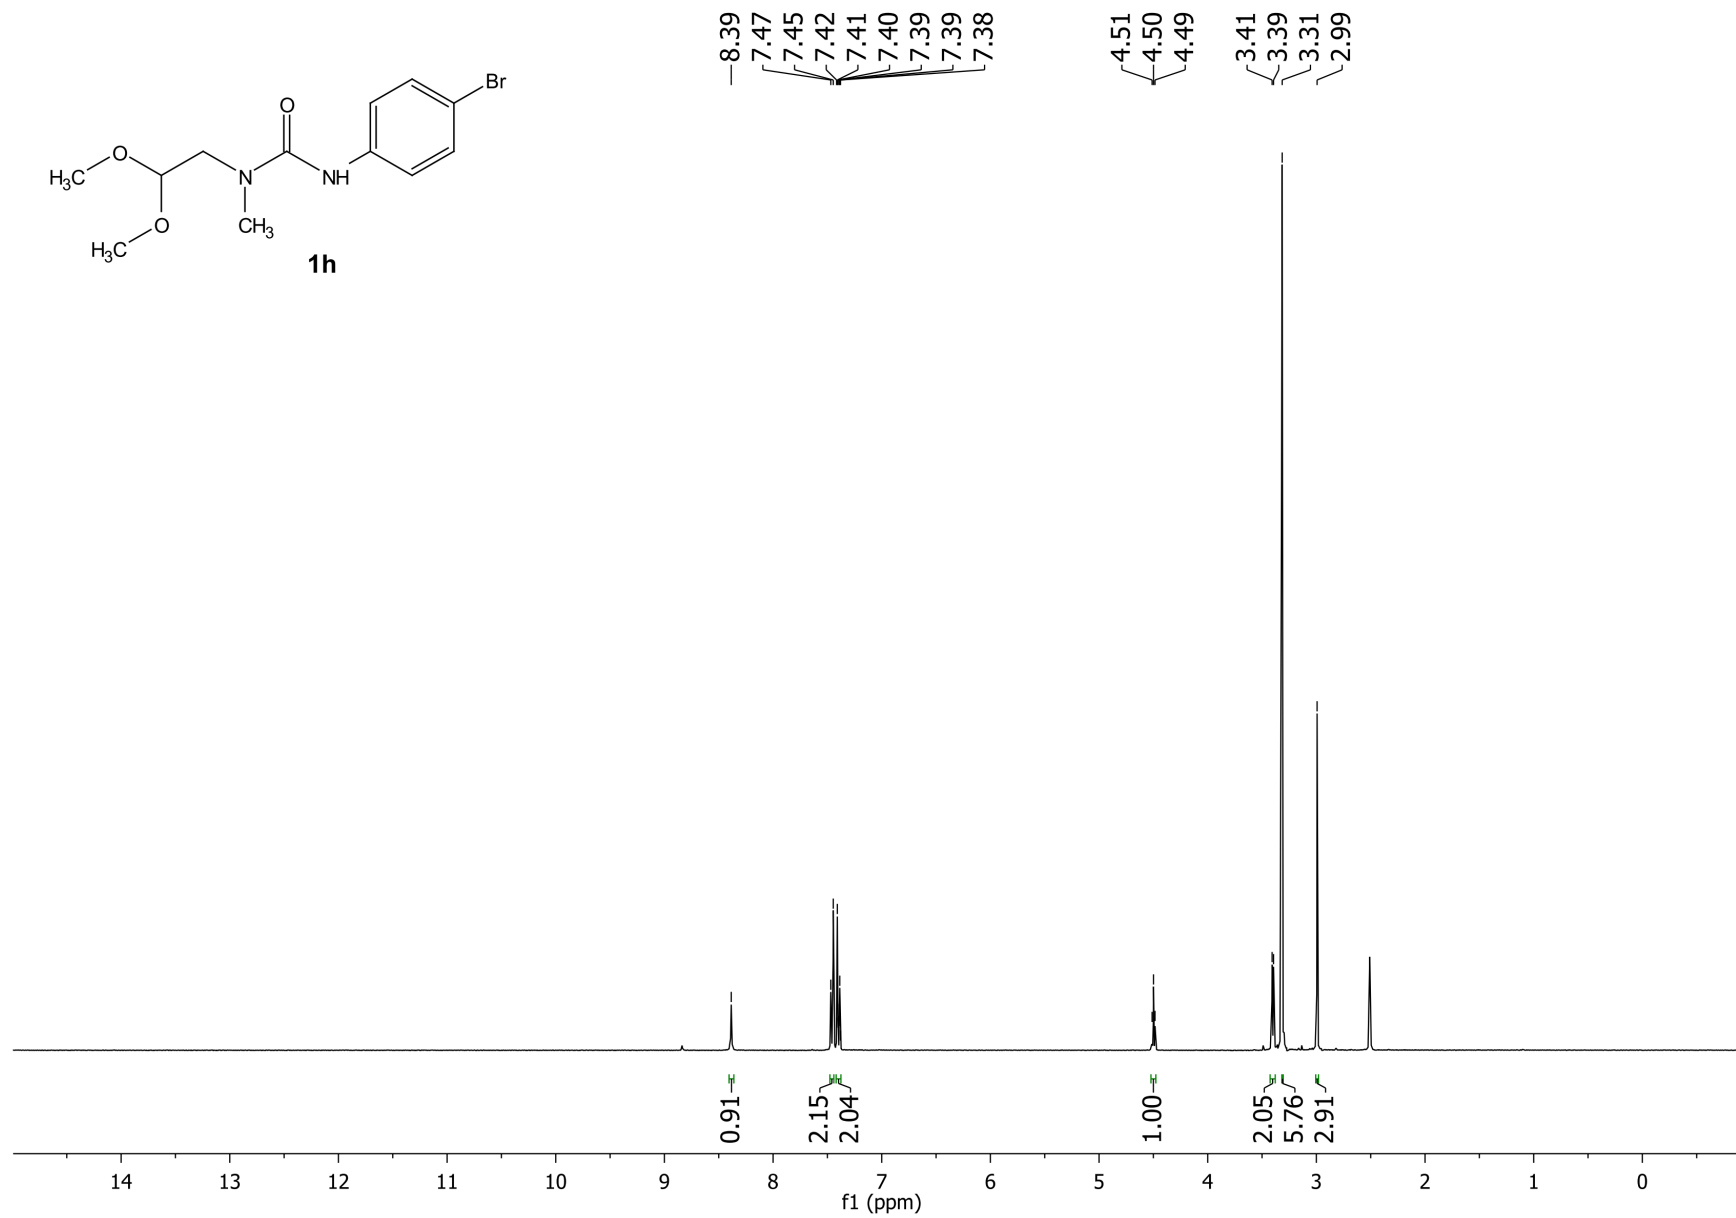

Figure S46. <sup>1</sup>H NMR spectrum (CDCl<sub>3</sub>, 400MHz) of the compound **1h**

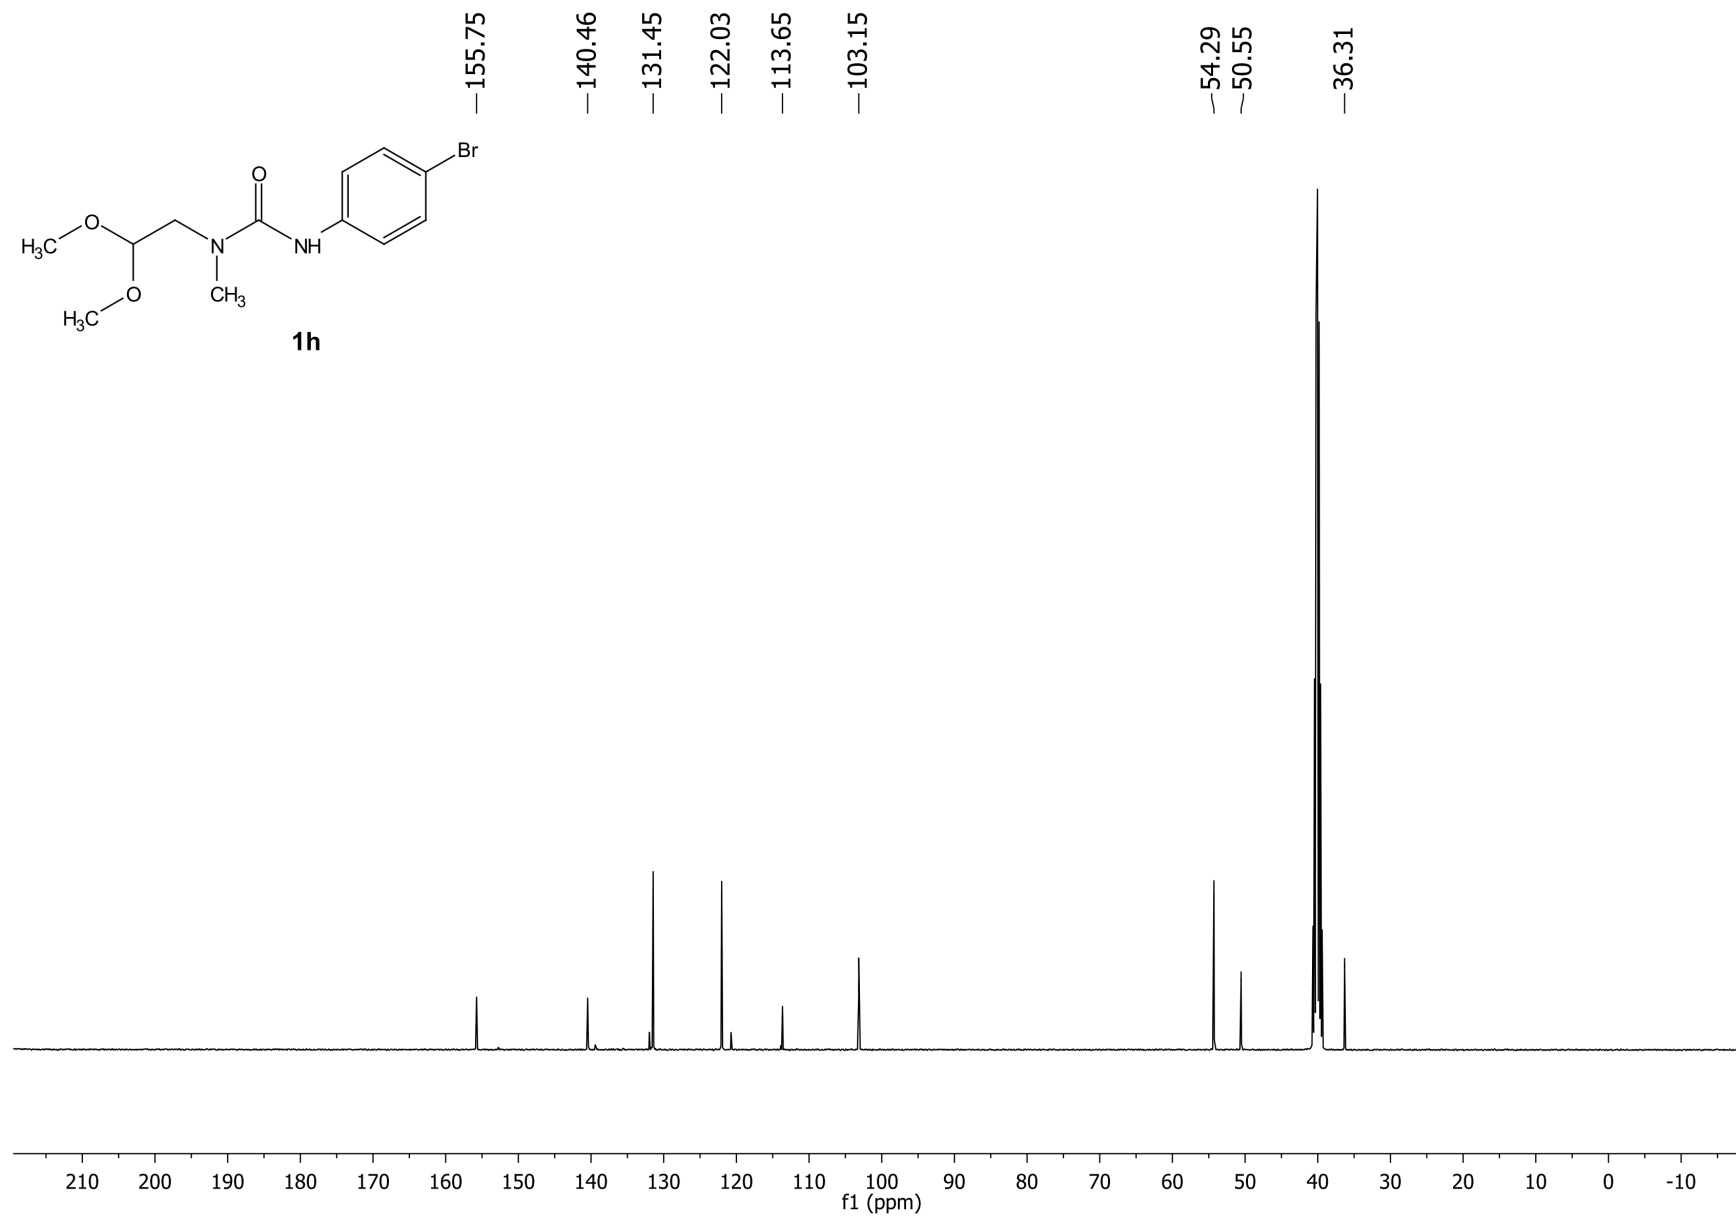

Figure S47.  $^{13}\text{C}$  NMR spectrum (CDCl<sub>3</sub>, 151MHz) of the compound **1h**

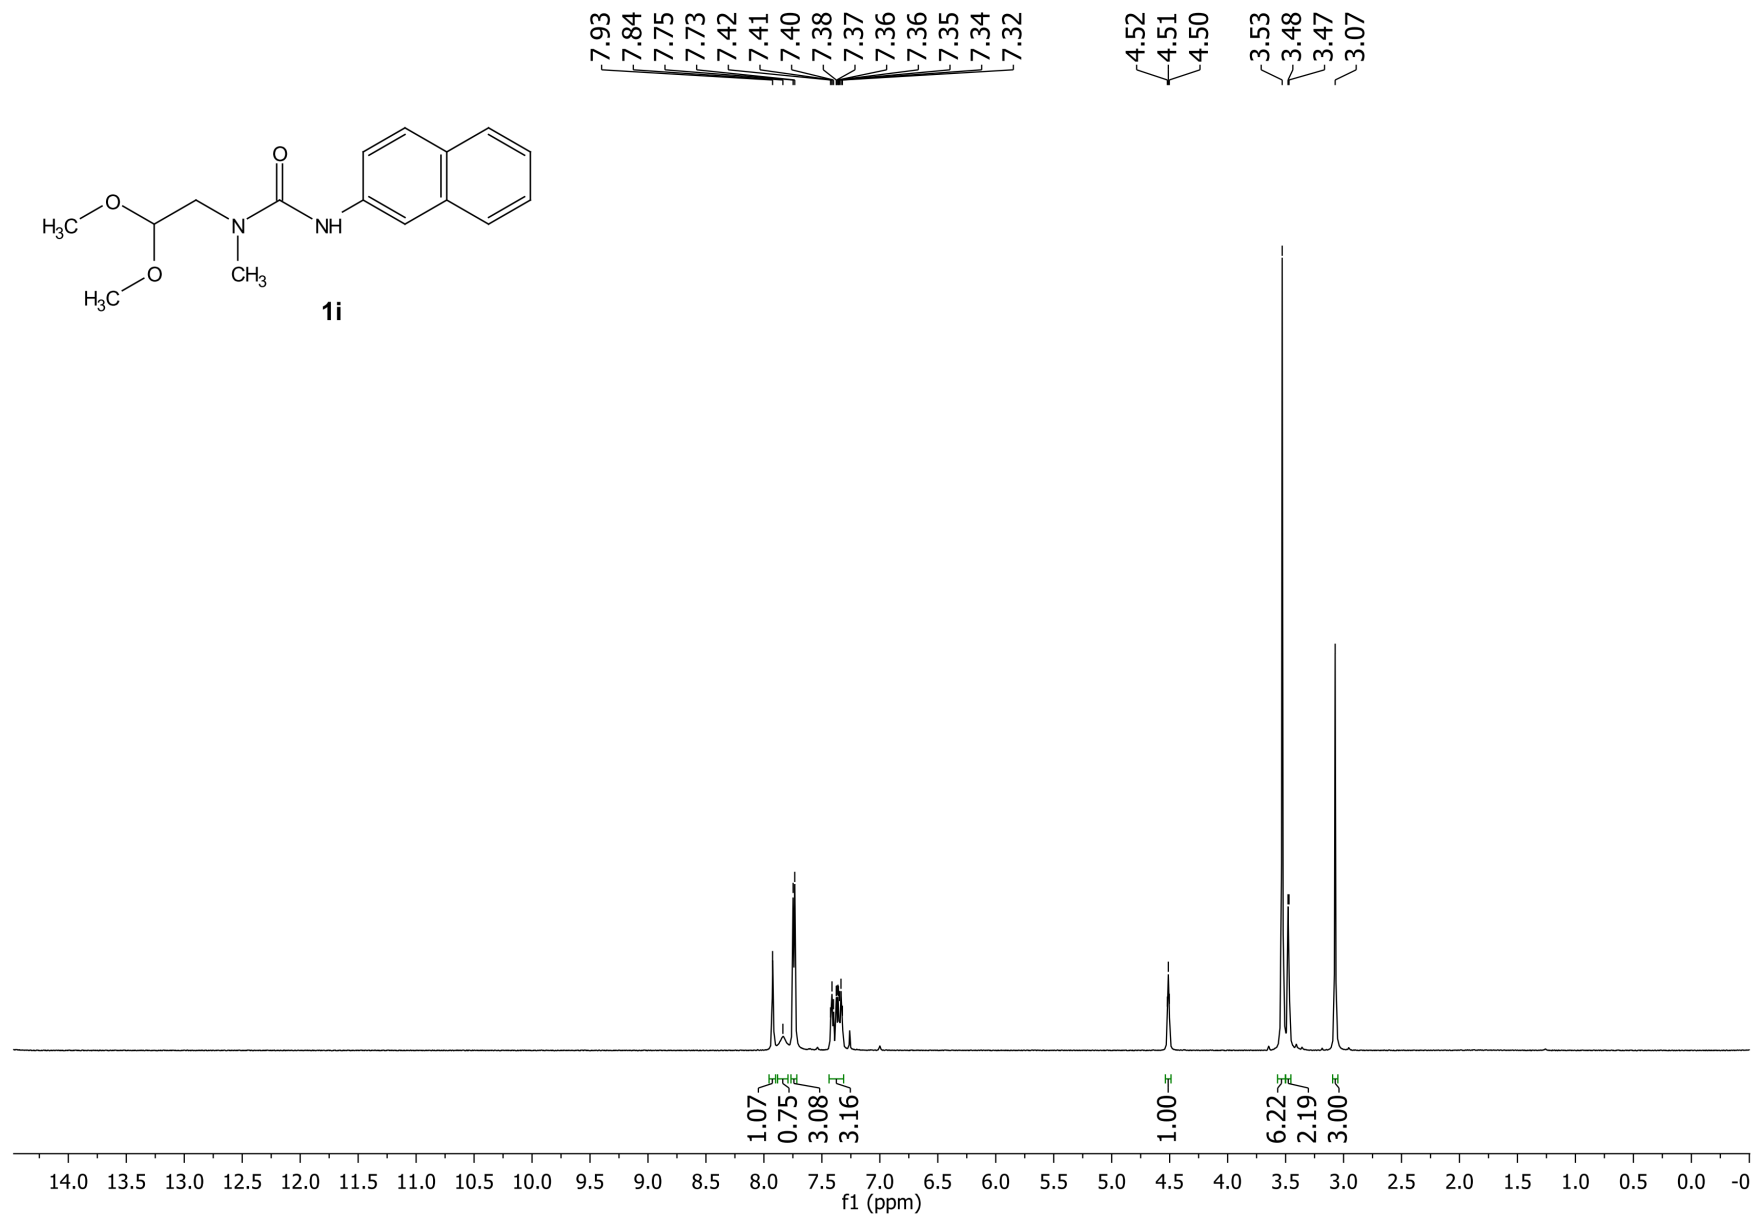

**Figure S48.**  $^1\text{H}$  NMR spectrum ( $\text{CDCl}_3$ , 400MHz) of the compound **1i**

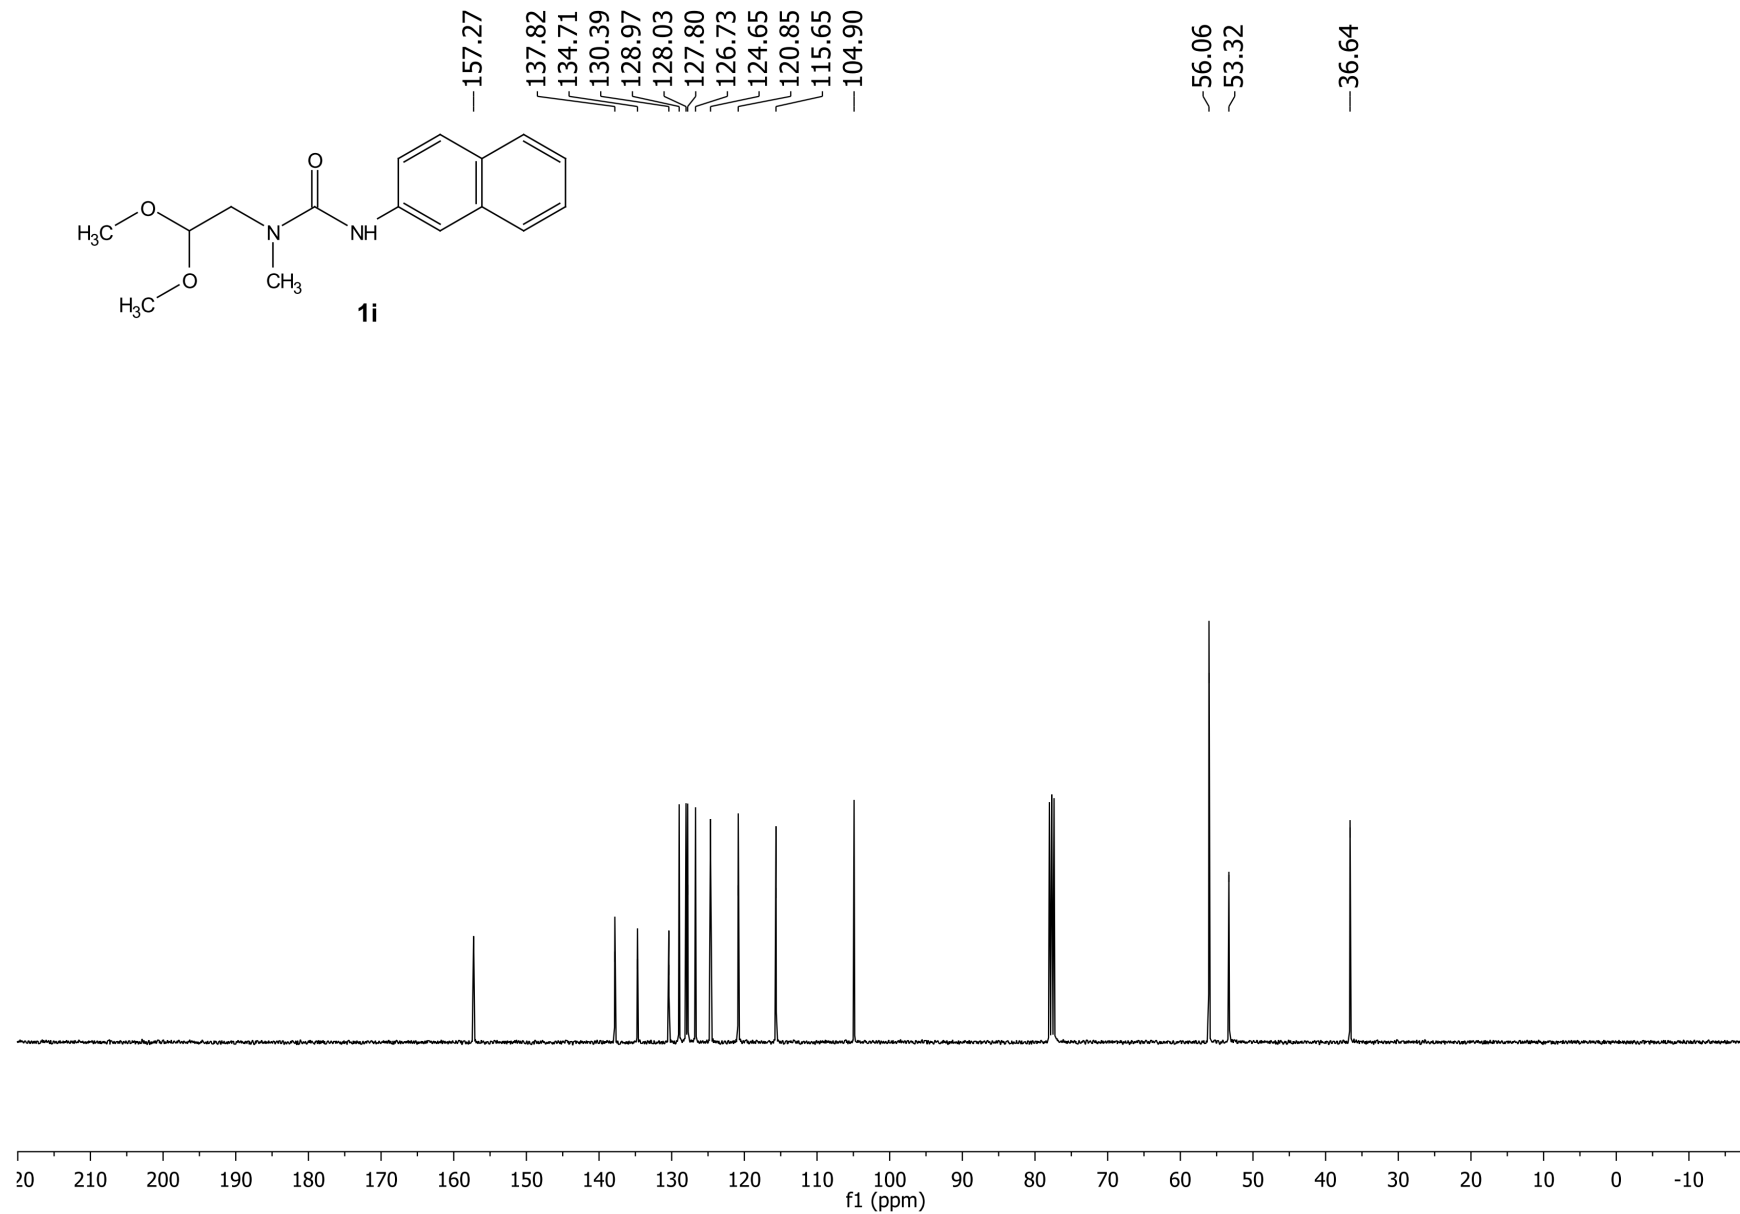

Figure S49.  $^{13}\text{C}$  NMR spectrum (CDCl<sub>3</sub>, 151MHz) of the compound **1i**

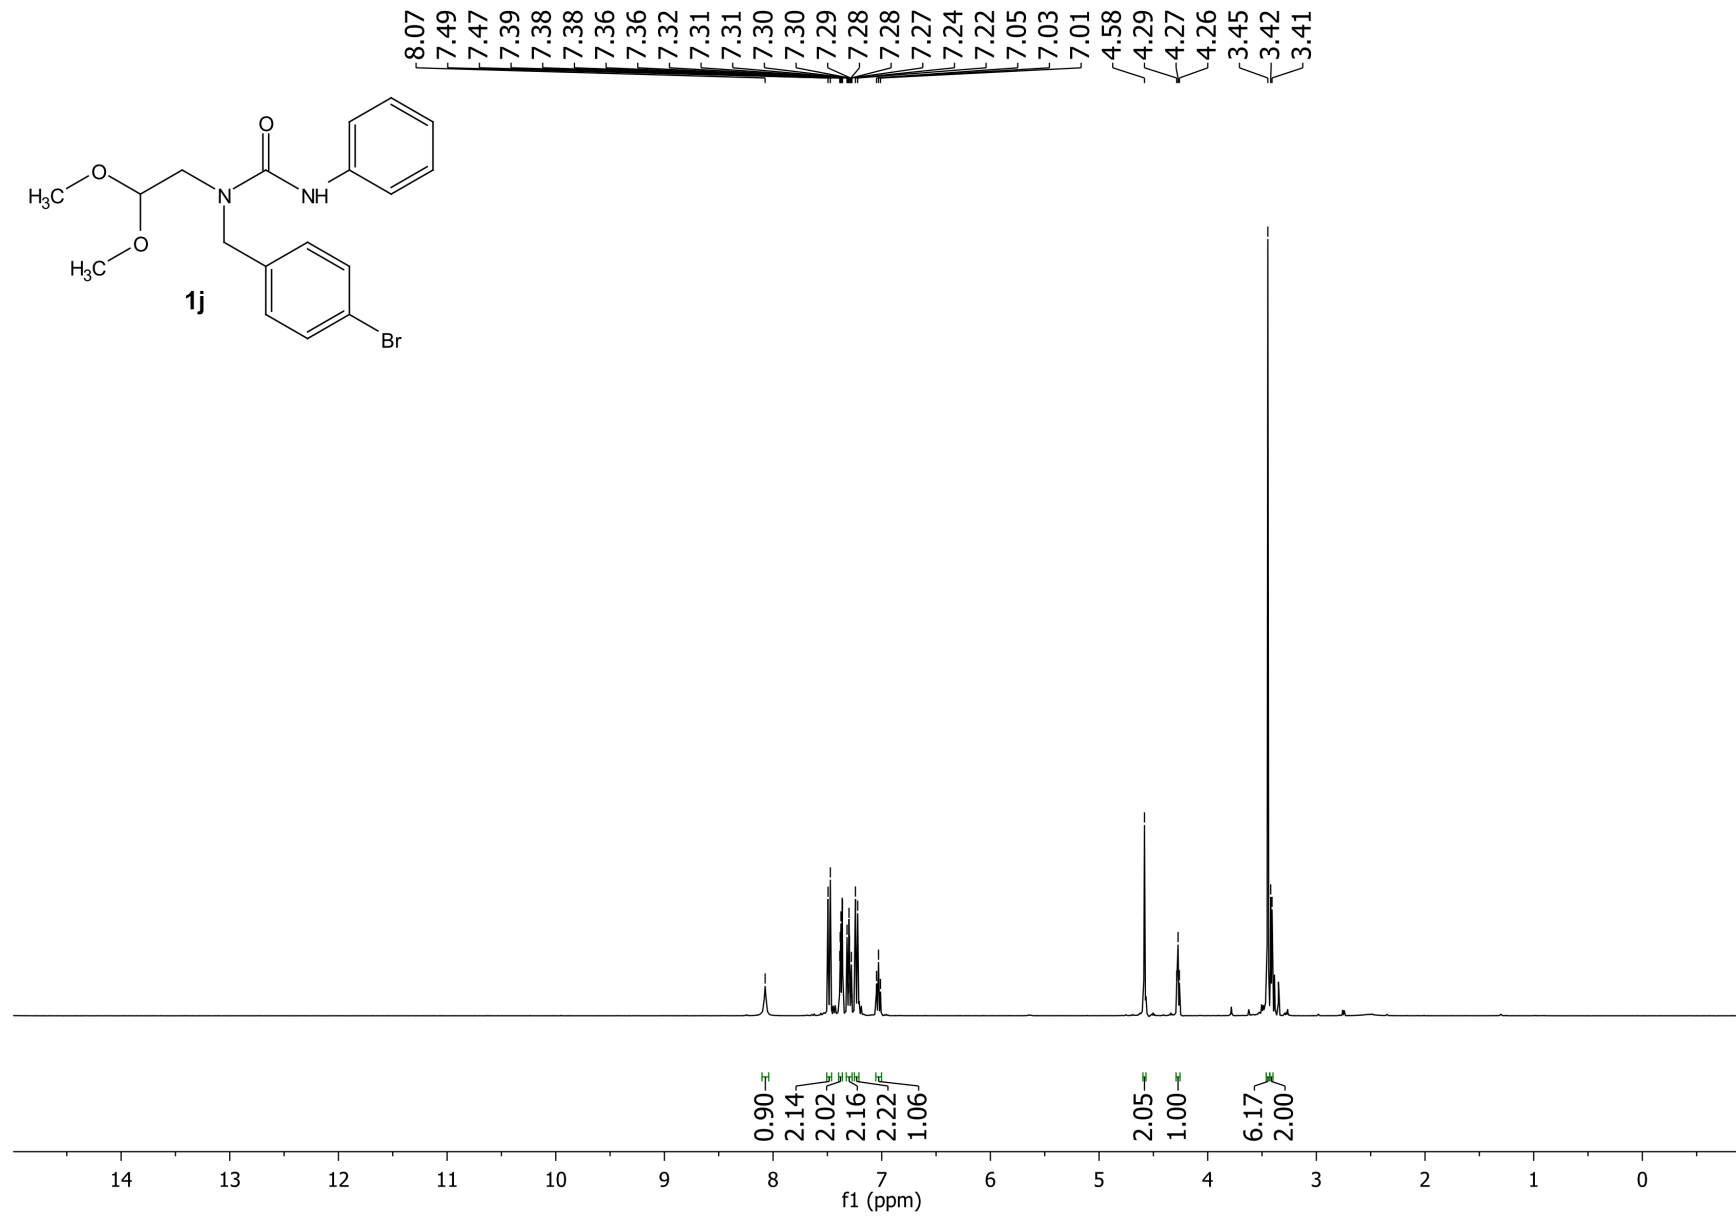

Figure S50. <sup>1</sup>H NMR spectrum (CDCl<sub>3</sub>, 600MHz) of the compound **1j**

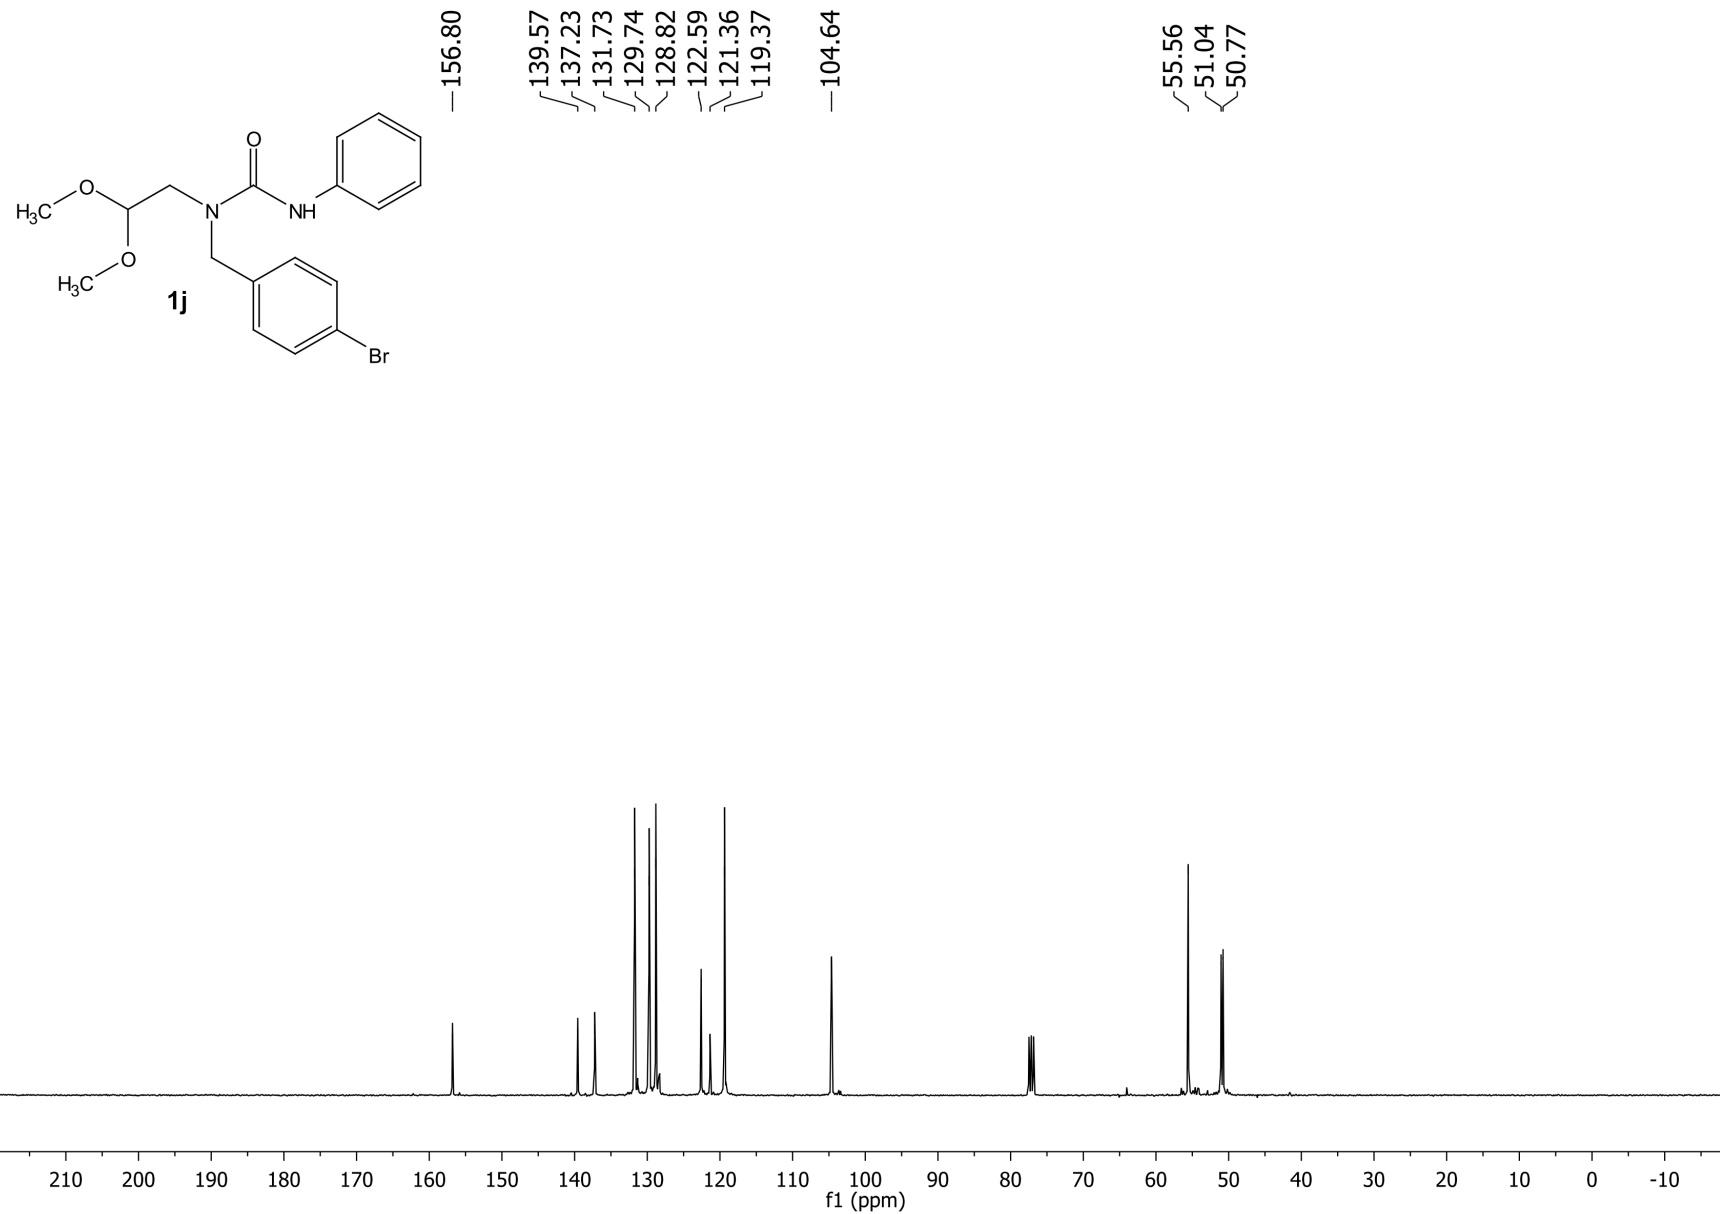

Figure S51.  $^{13}\text{C}$  NMR spectrum (CDCl<sub>3</sub>, 151MHz) of the compound **1j**

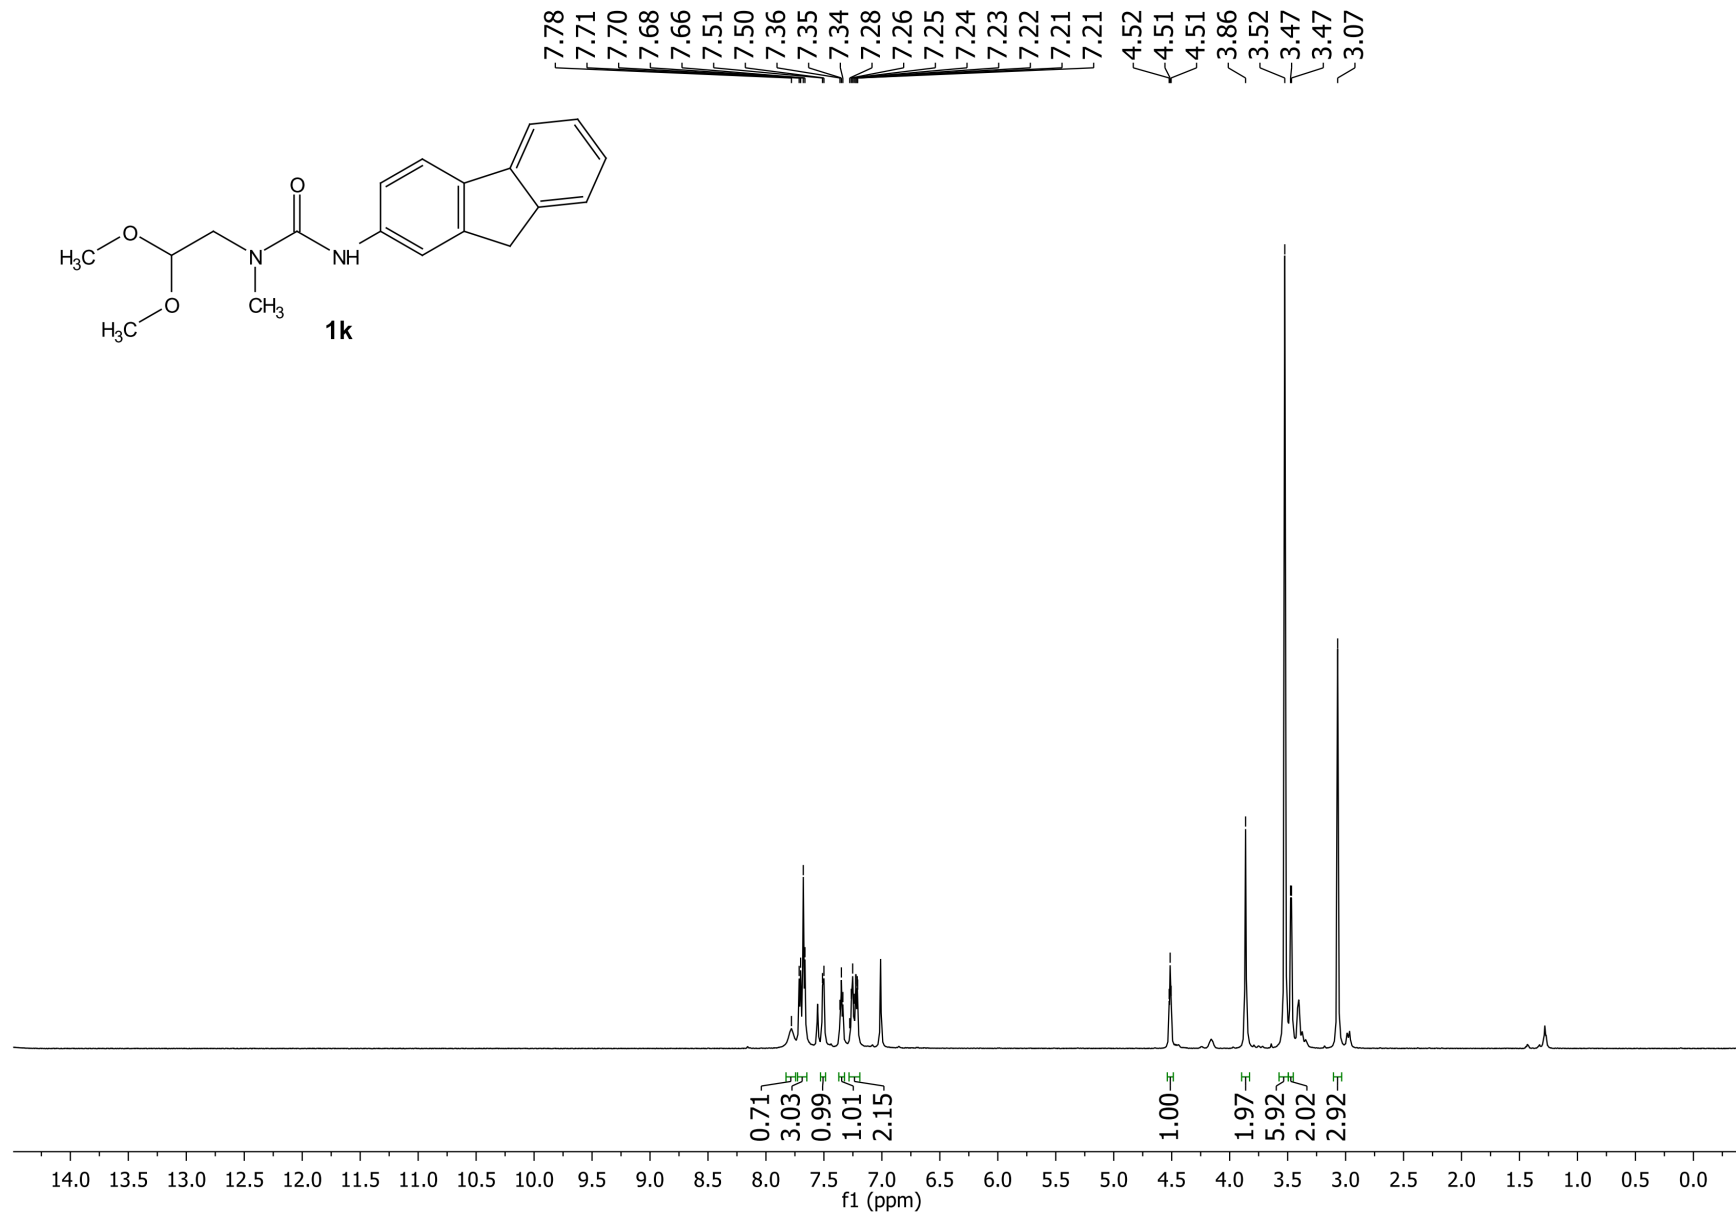

Figure S52. <sup>1</sup>H NMR spectrum (CDCl<sub>3</sub>, 500MHz) of the compound **1k**



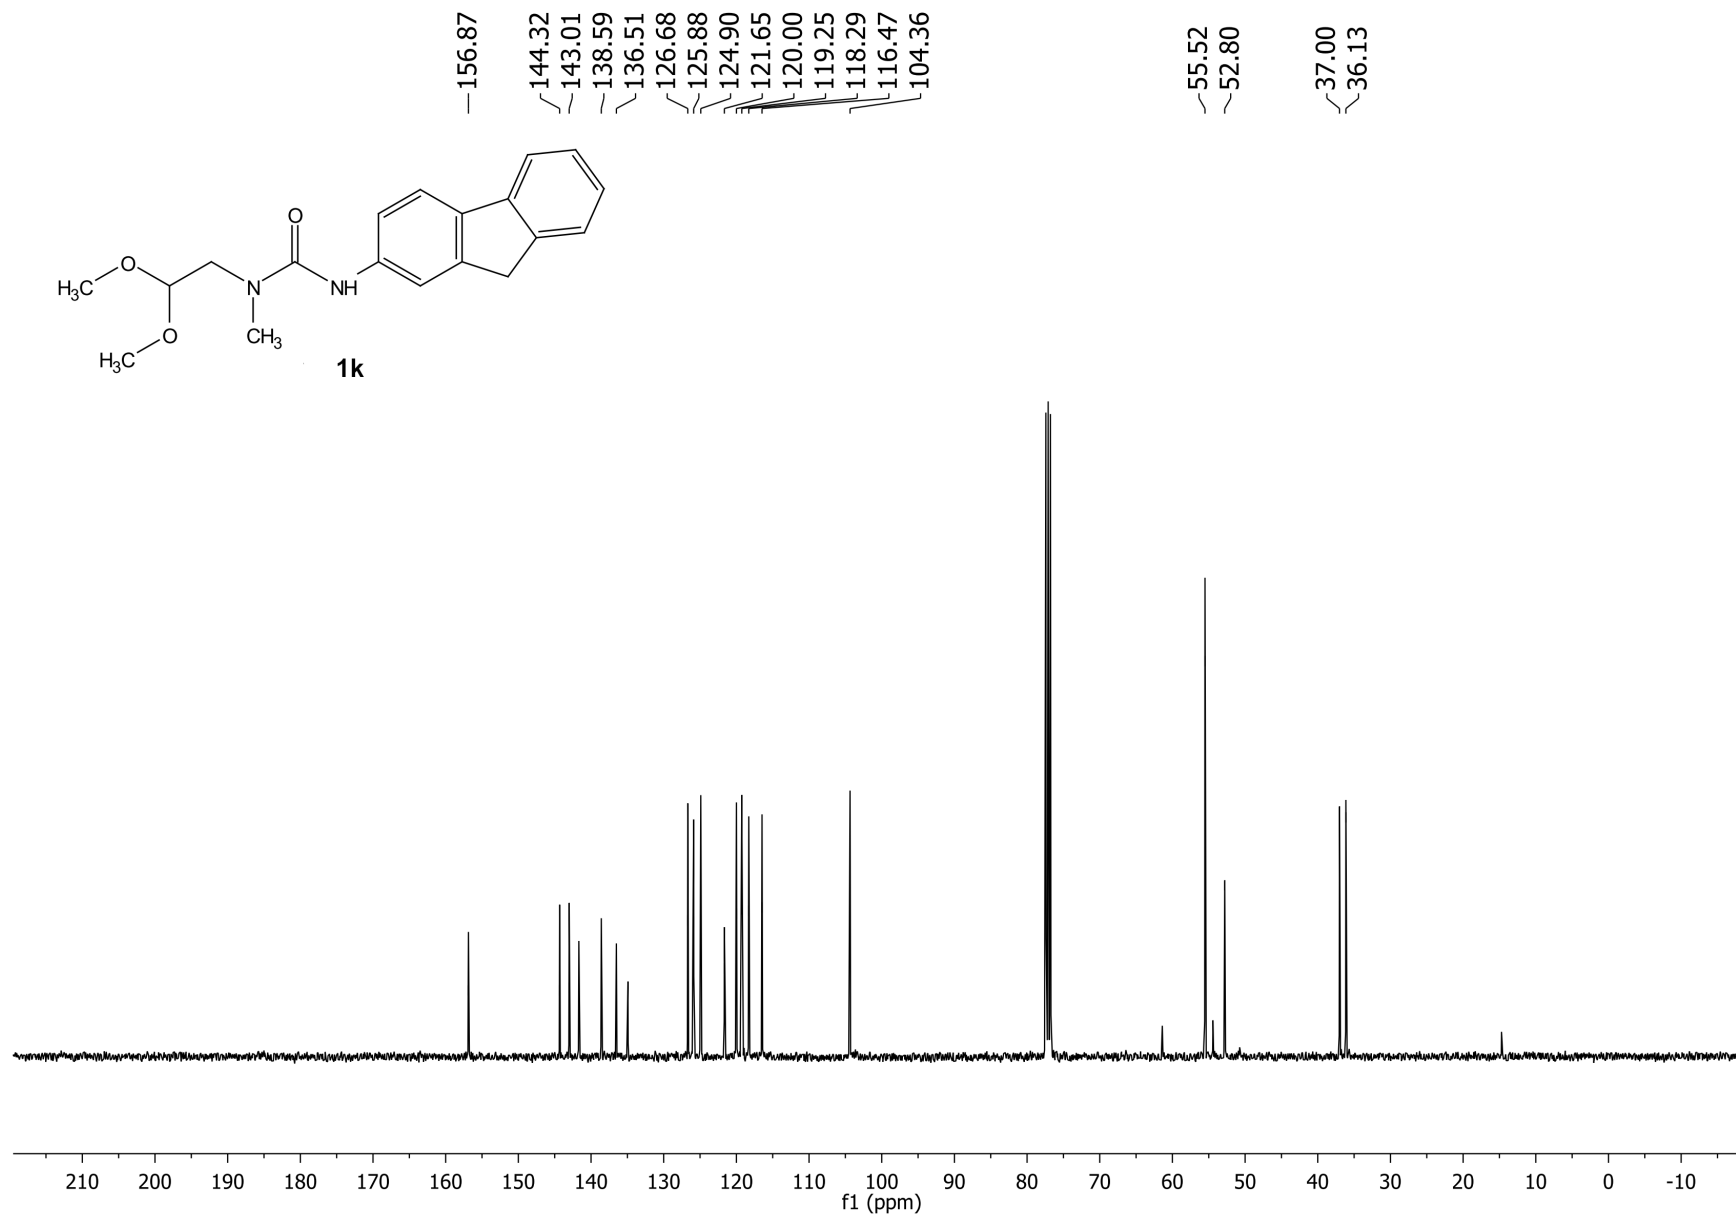

Figure S53. <sup>13</sup>C NMR spectrum (CDCl<sub>3</sub>, 151MHz) of the compound **1k**

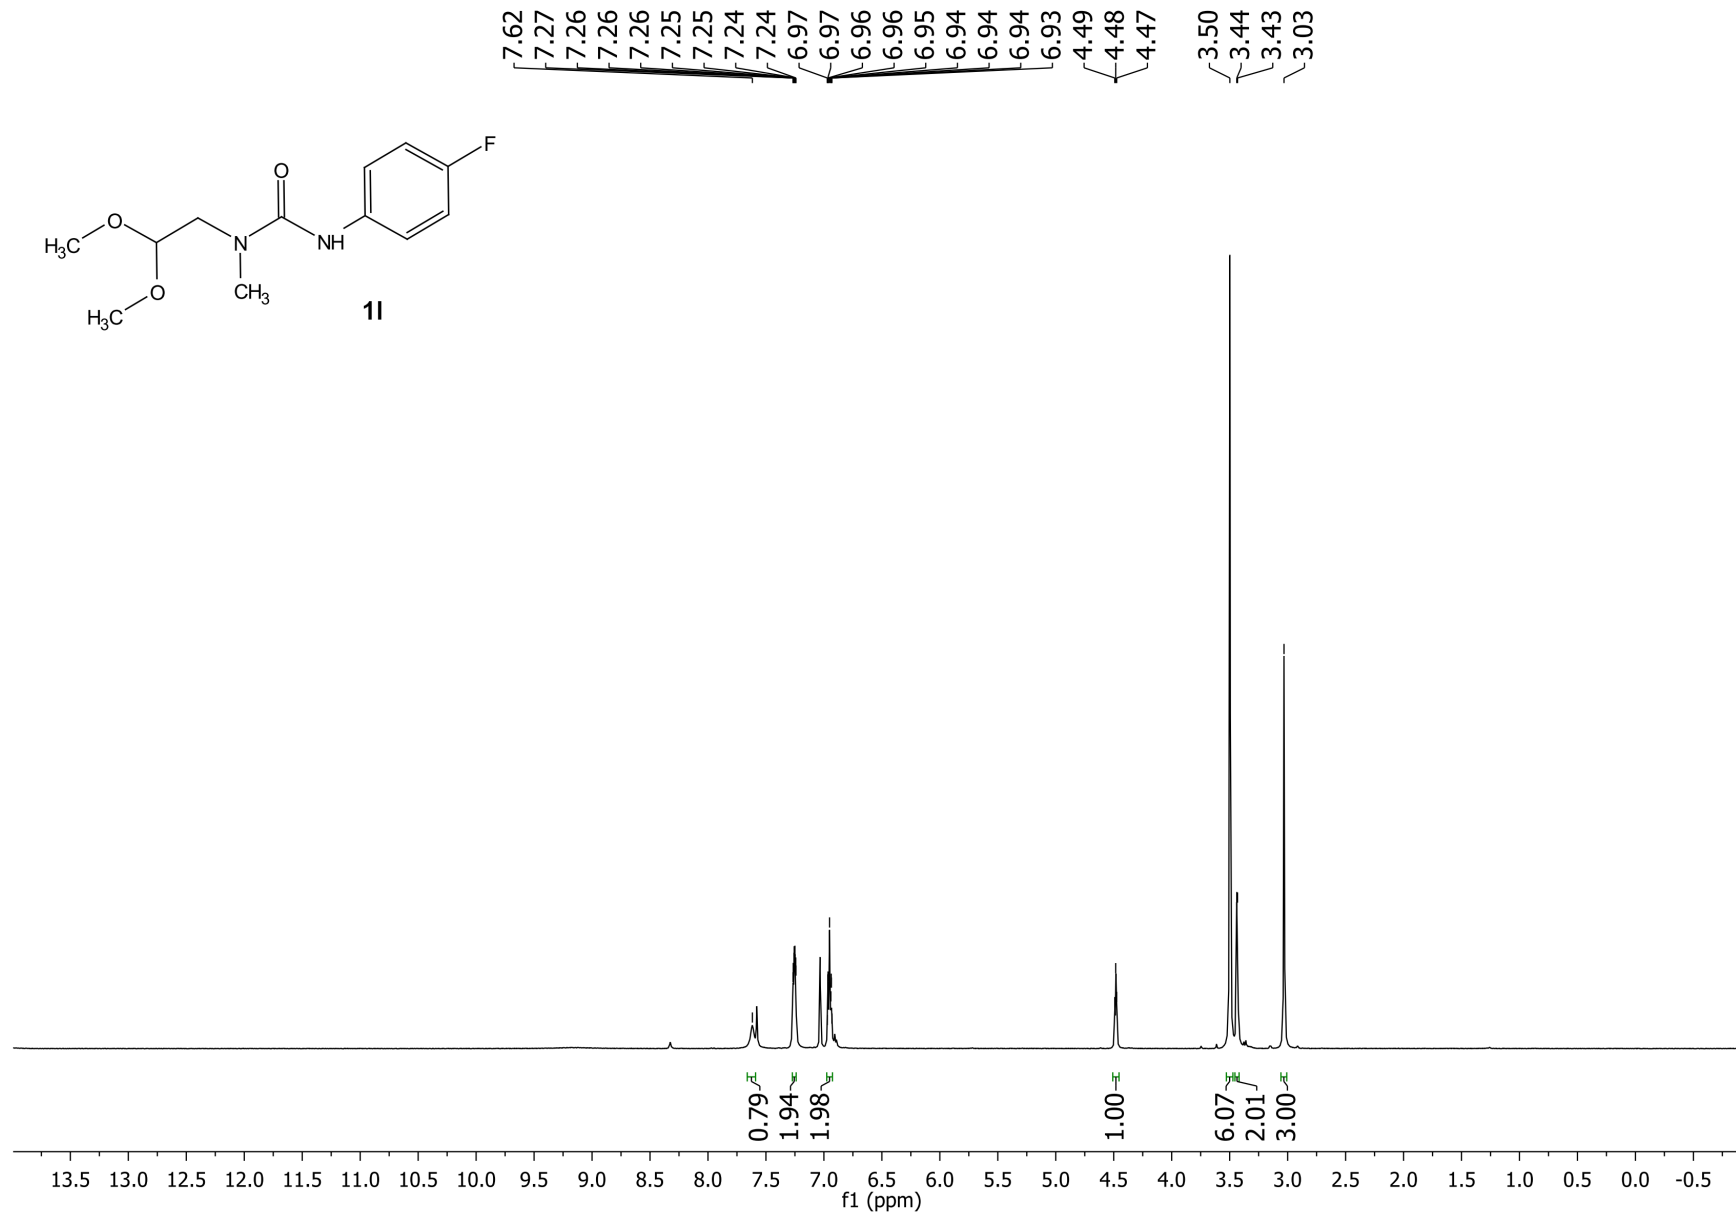

Figure S54. <sup>1</sup>H NMR spectrum (CDCl<sub>3</sub>, 500MHz) of the compound **11**

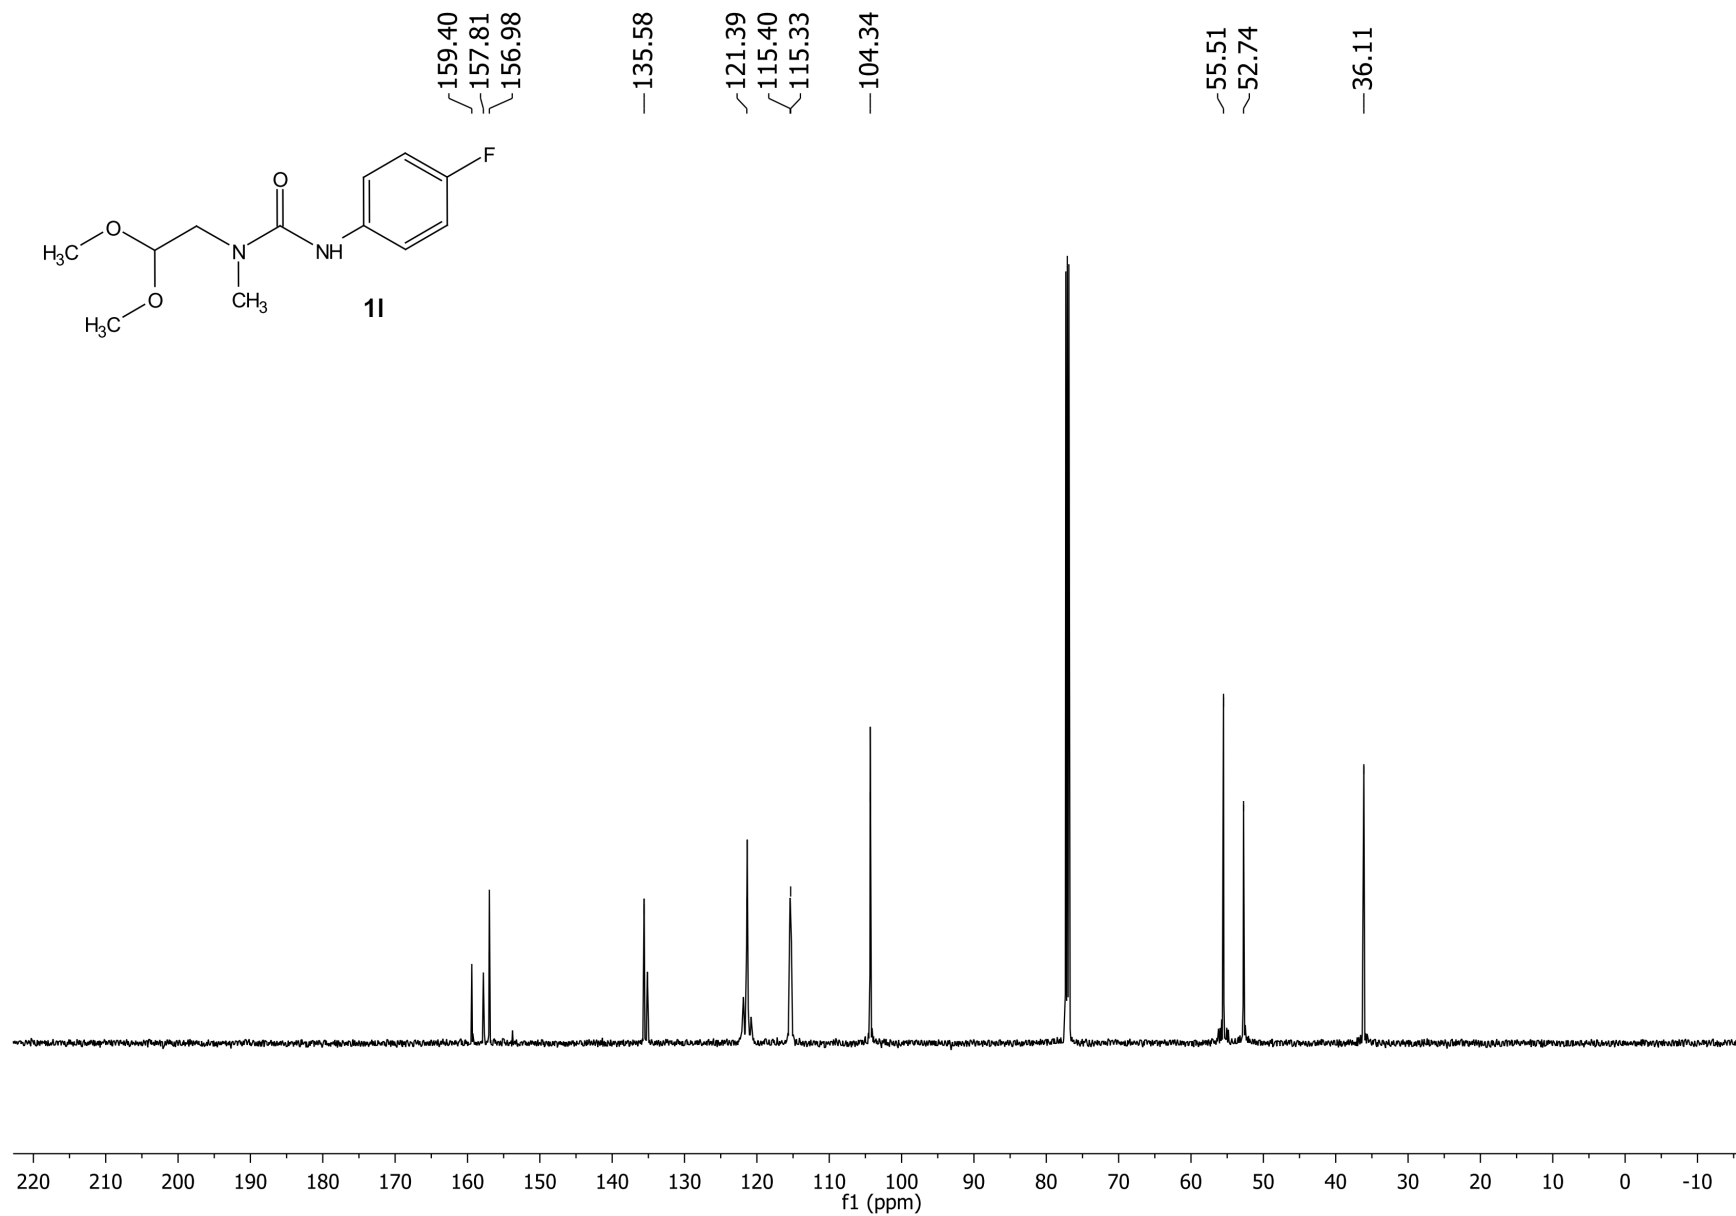

Figure S55.  $^{13}\text{C}$  NMR spectrum (CDCl<sub>3</sub>, 151MHz) of the compound **11**

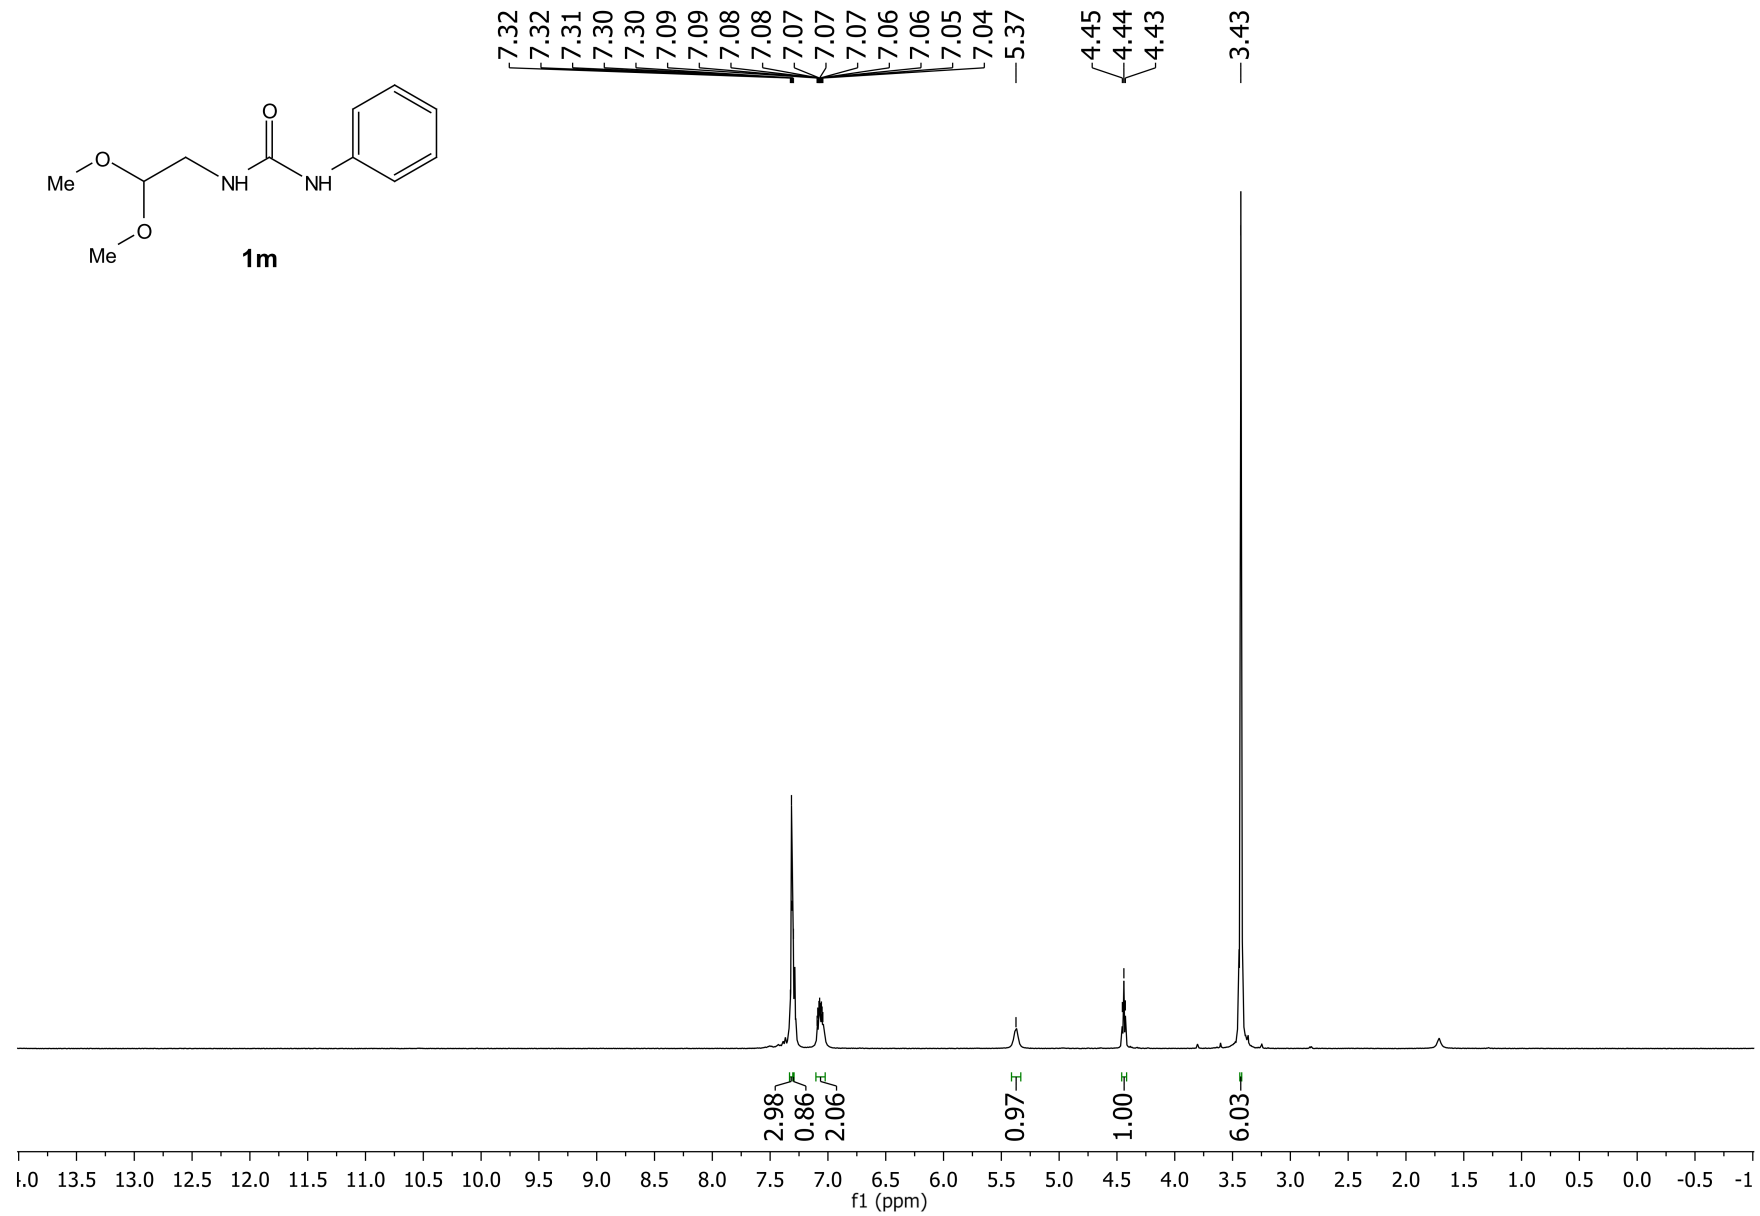

Figure S56. <sup>1</sup>H NMR spectrum (CDCl<sub>3</sub>, 400MHz) of the compound **1m**

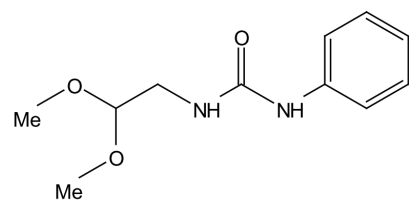

**1m**

—156.45

—138.92

—129.04

—123.19

—120.25

—103.58

—54.54

—41.86

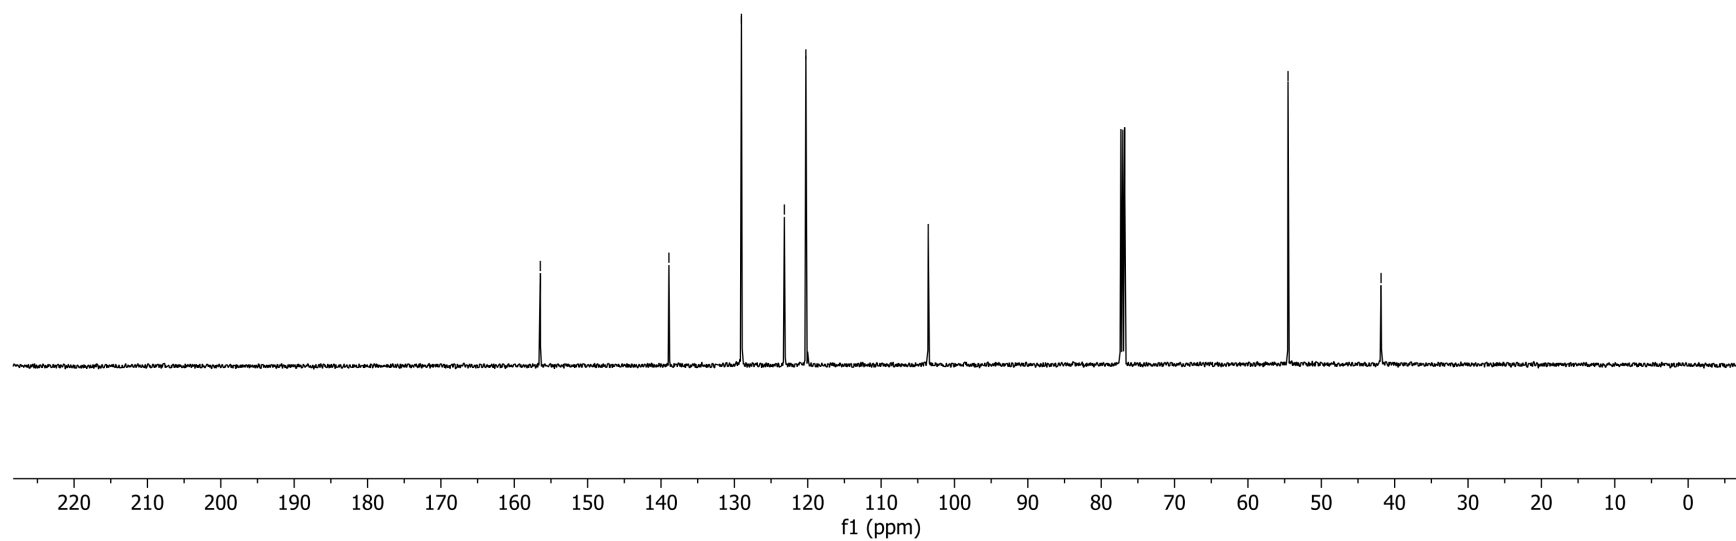

**Figure S57.**  $^{13}\text{C}$  NMR spectrum ( $\text{CDCl}_3$ , 151MHz) of the compound **1m**

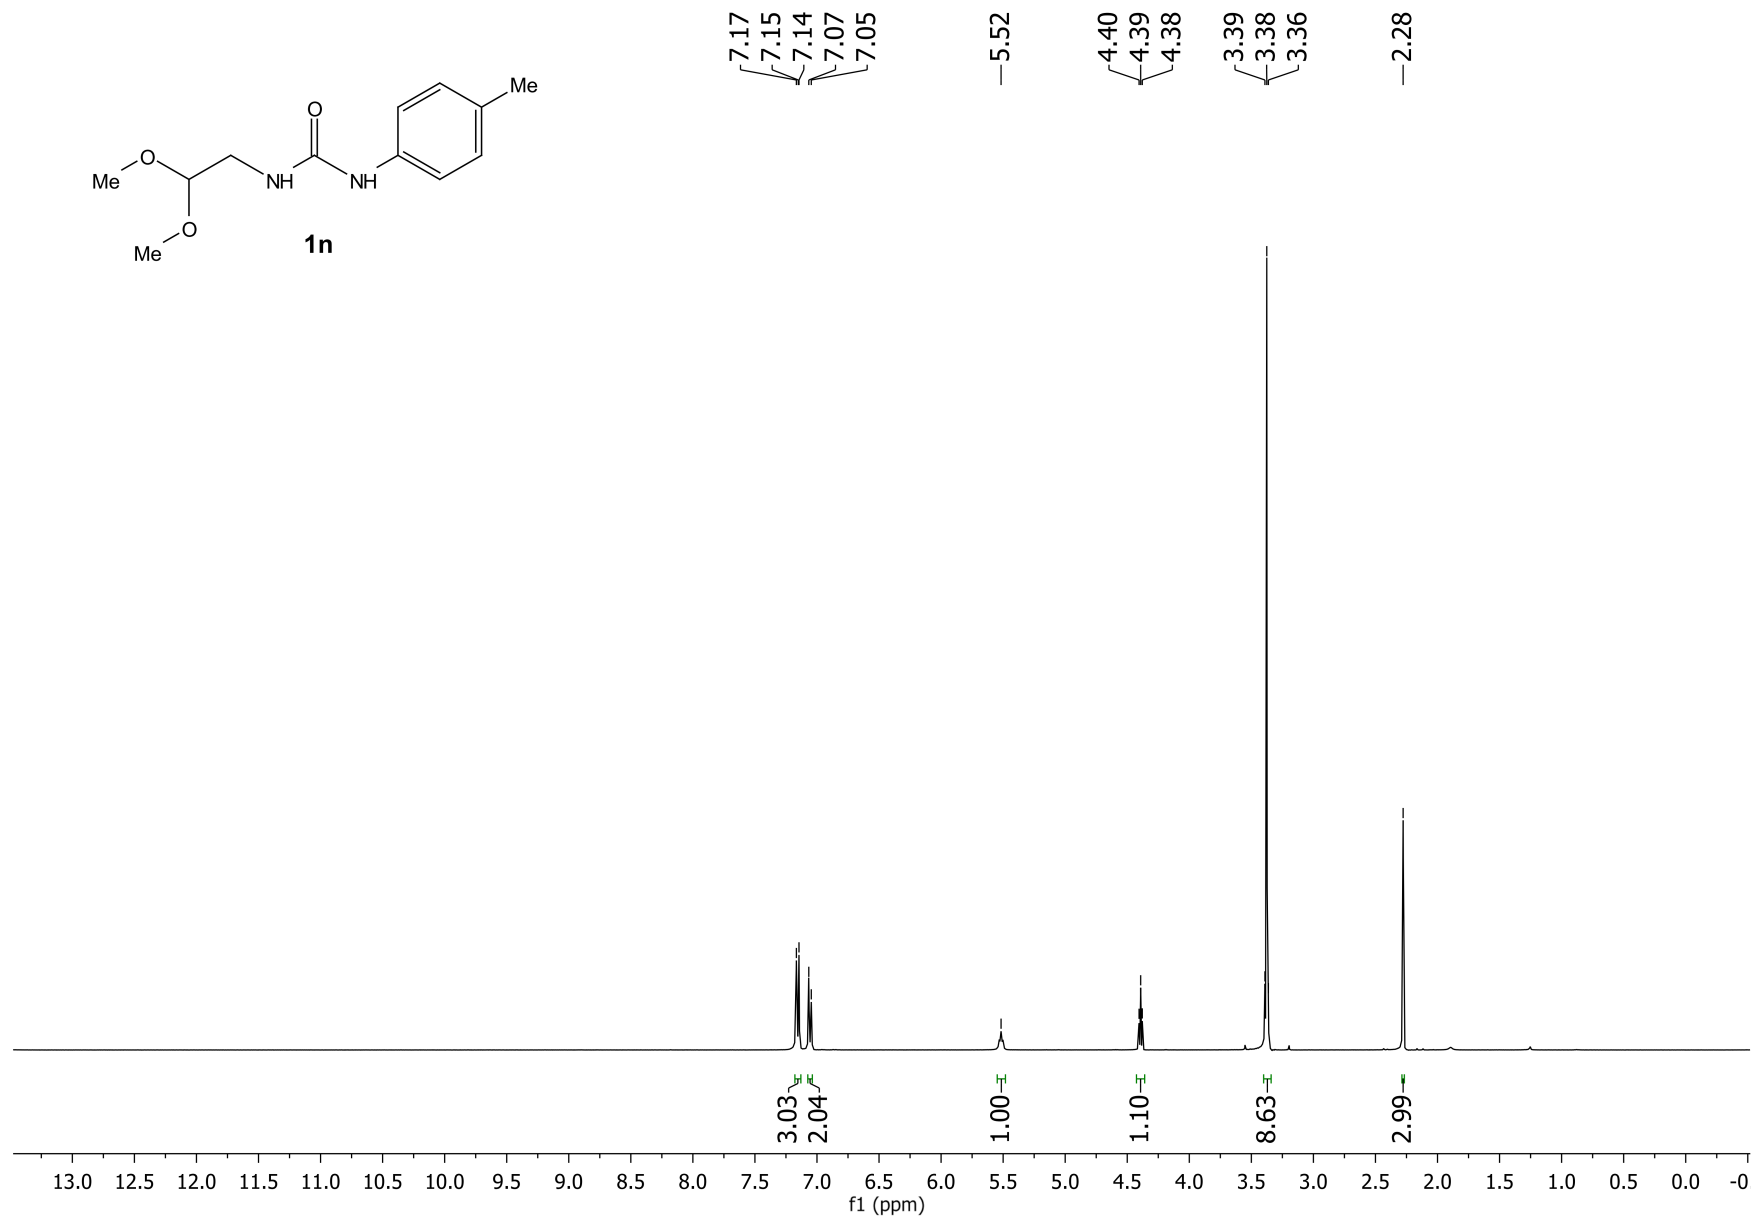

**Figure S58.** <sup>1</sup>H NMR spectrum (CDCl<sub>3</sub>, 400MHz) of the compound **1n**

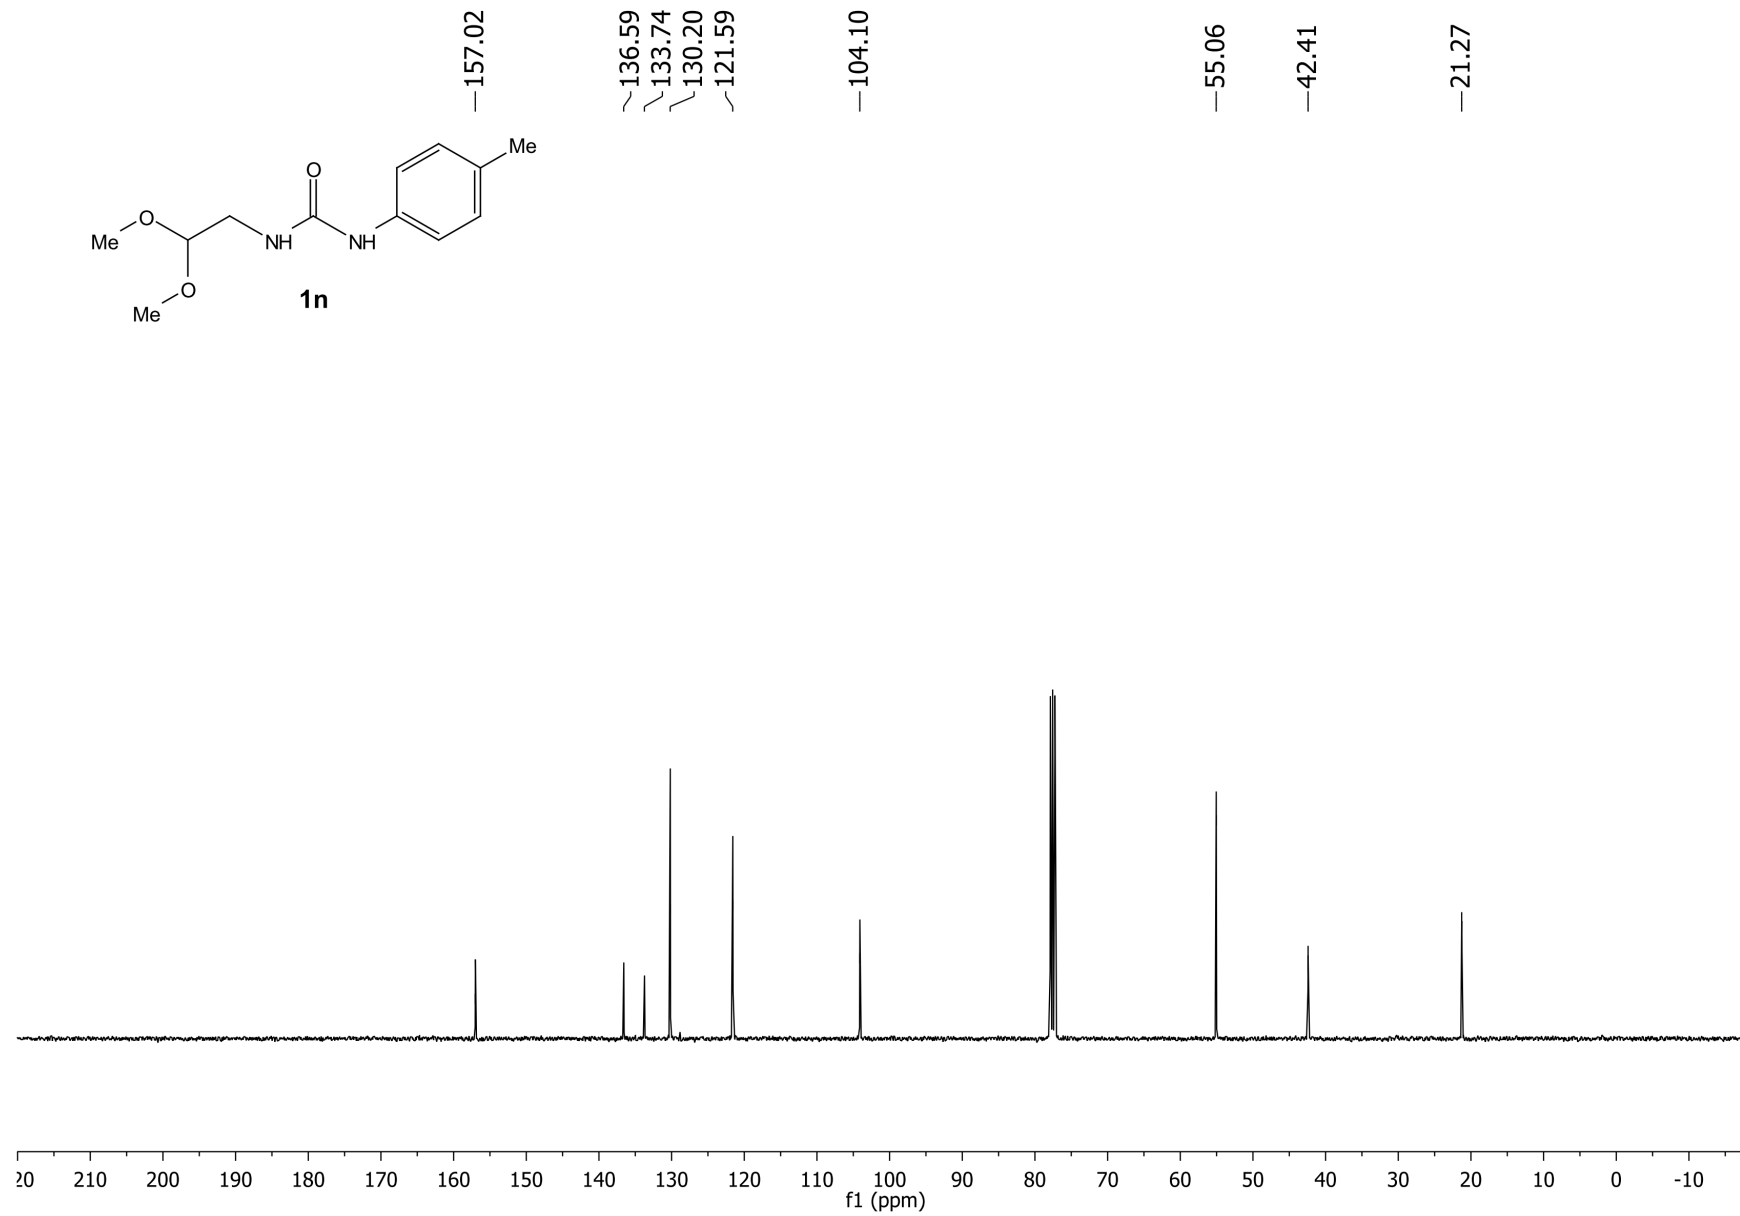

Figure S59.  $^{13}\text{C}$  NMR spectrum (CDCl<sub>3</sub>, 151MHz) of the compound **1n**

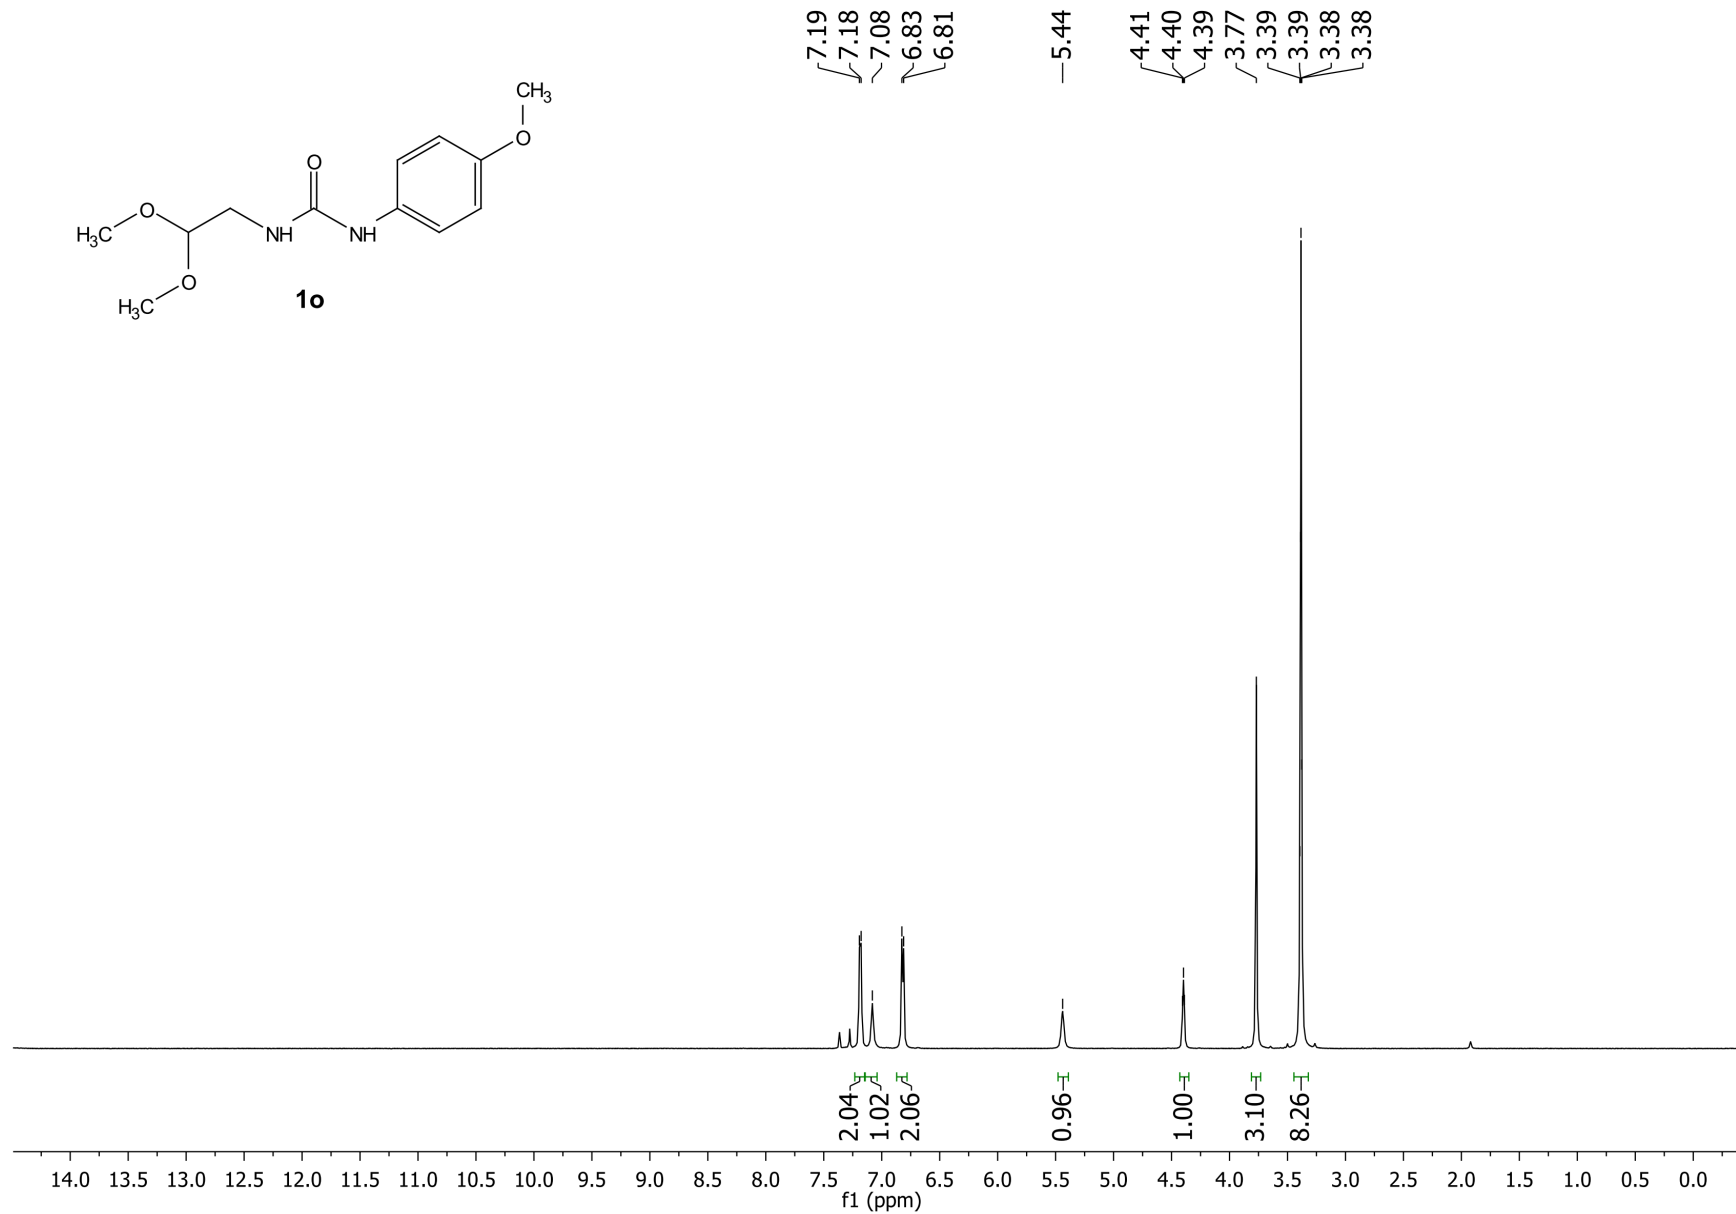

**Figure S60.**  $^1\text{H}$  NMR spectrum (CDCl<sub>3</sub>, 400MHz) of the compound **1o**



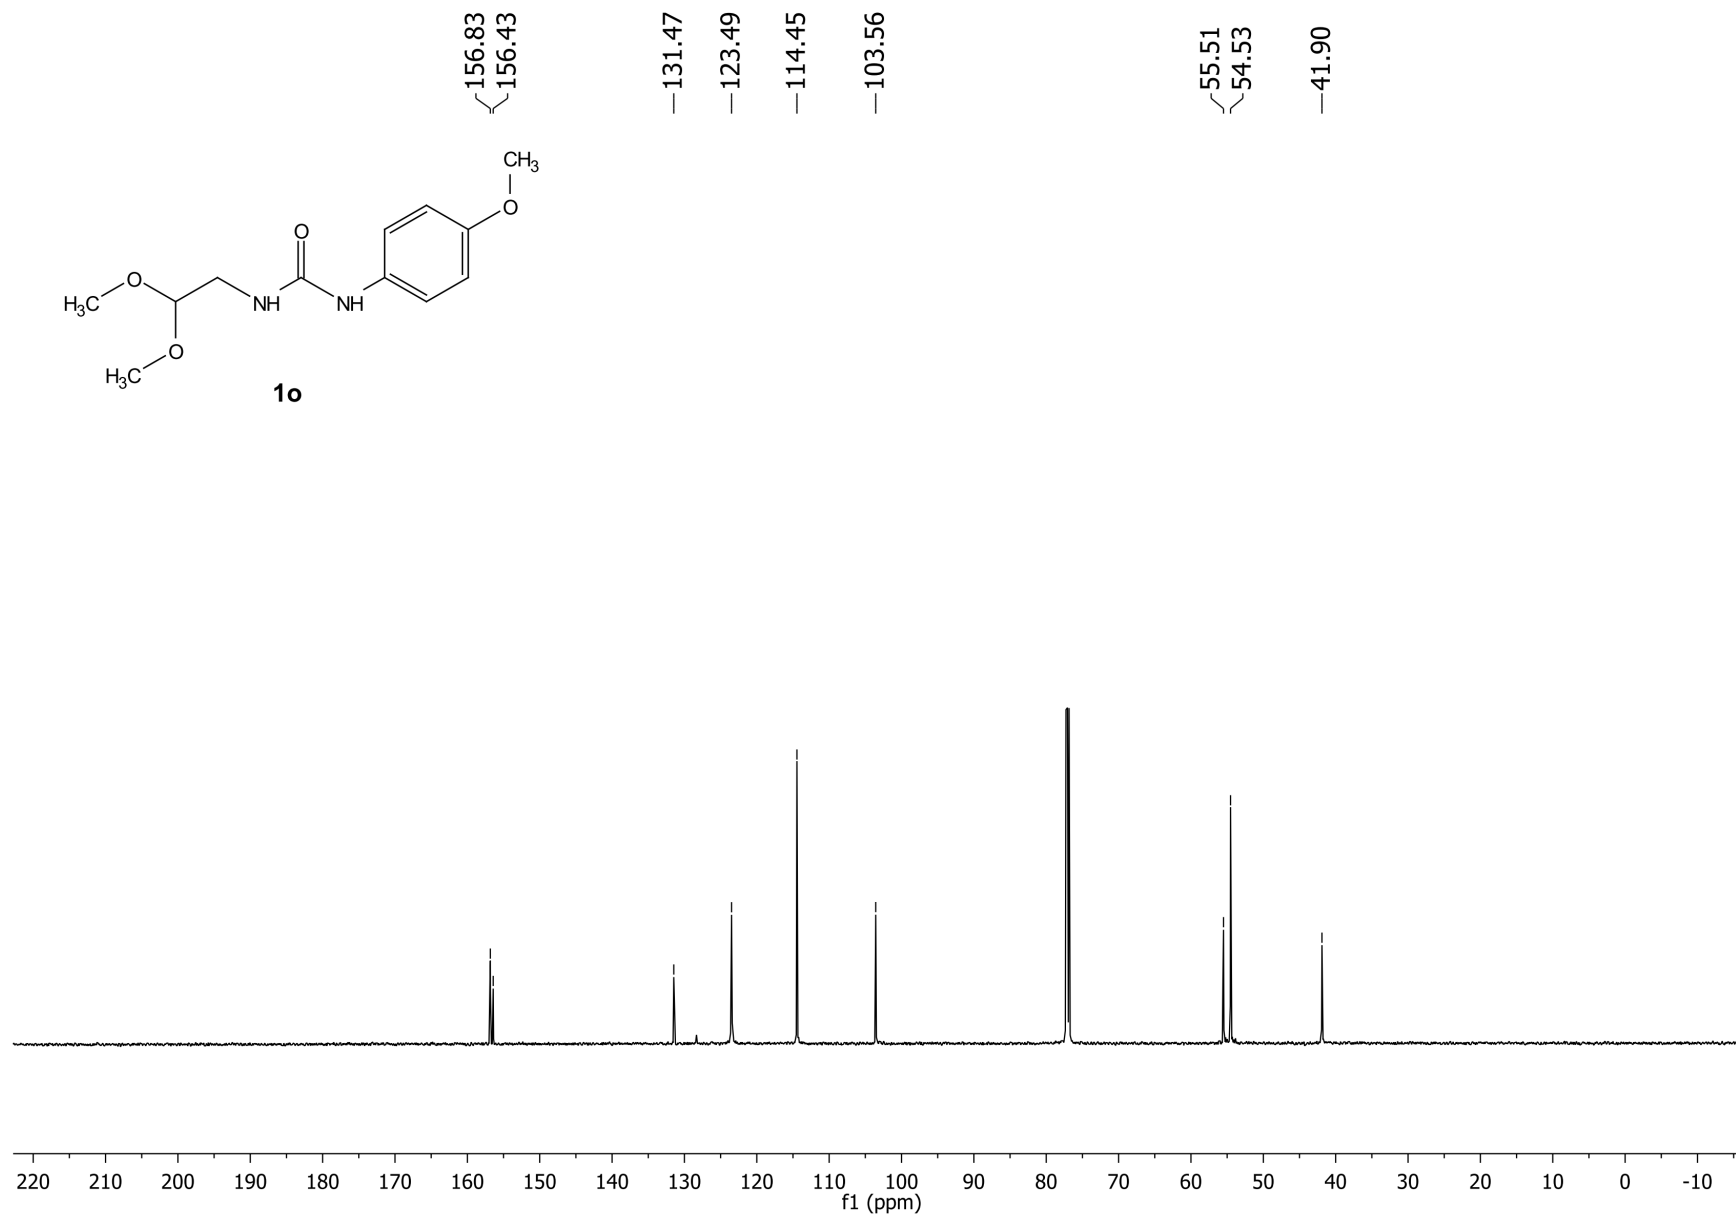

**Figure S61.**  $^{13}\text{C}$  NMR spectrum ( $\text{CDCl}_3$ , 151MHz) of the compound **1o**

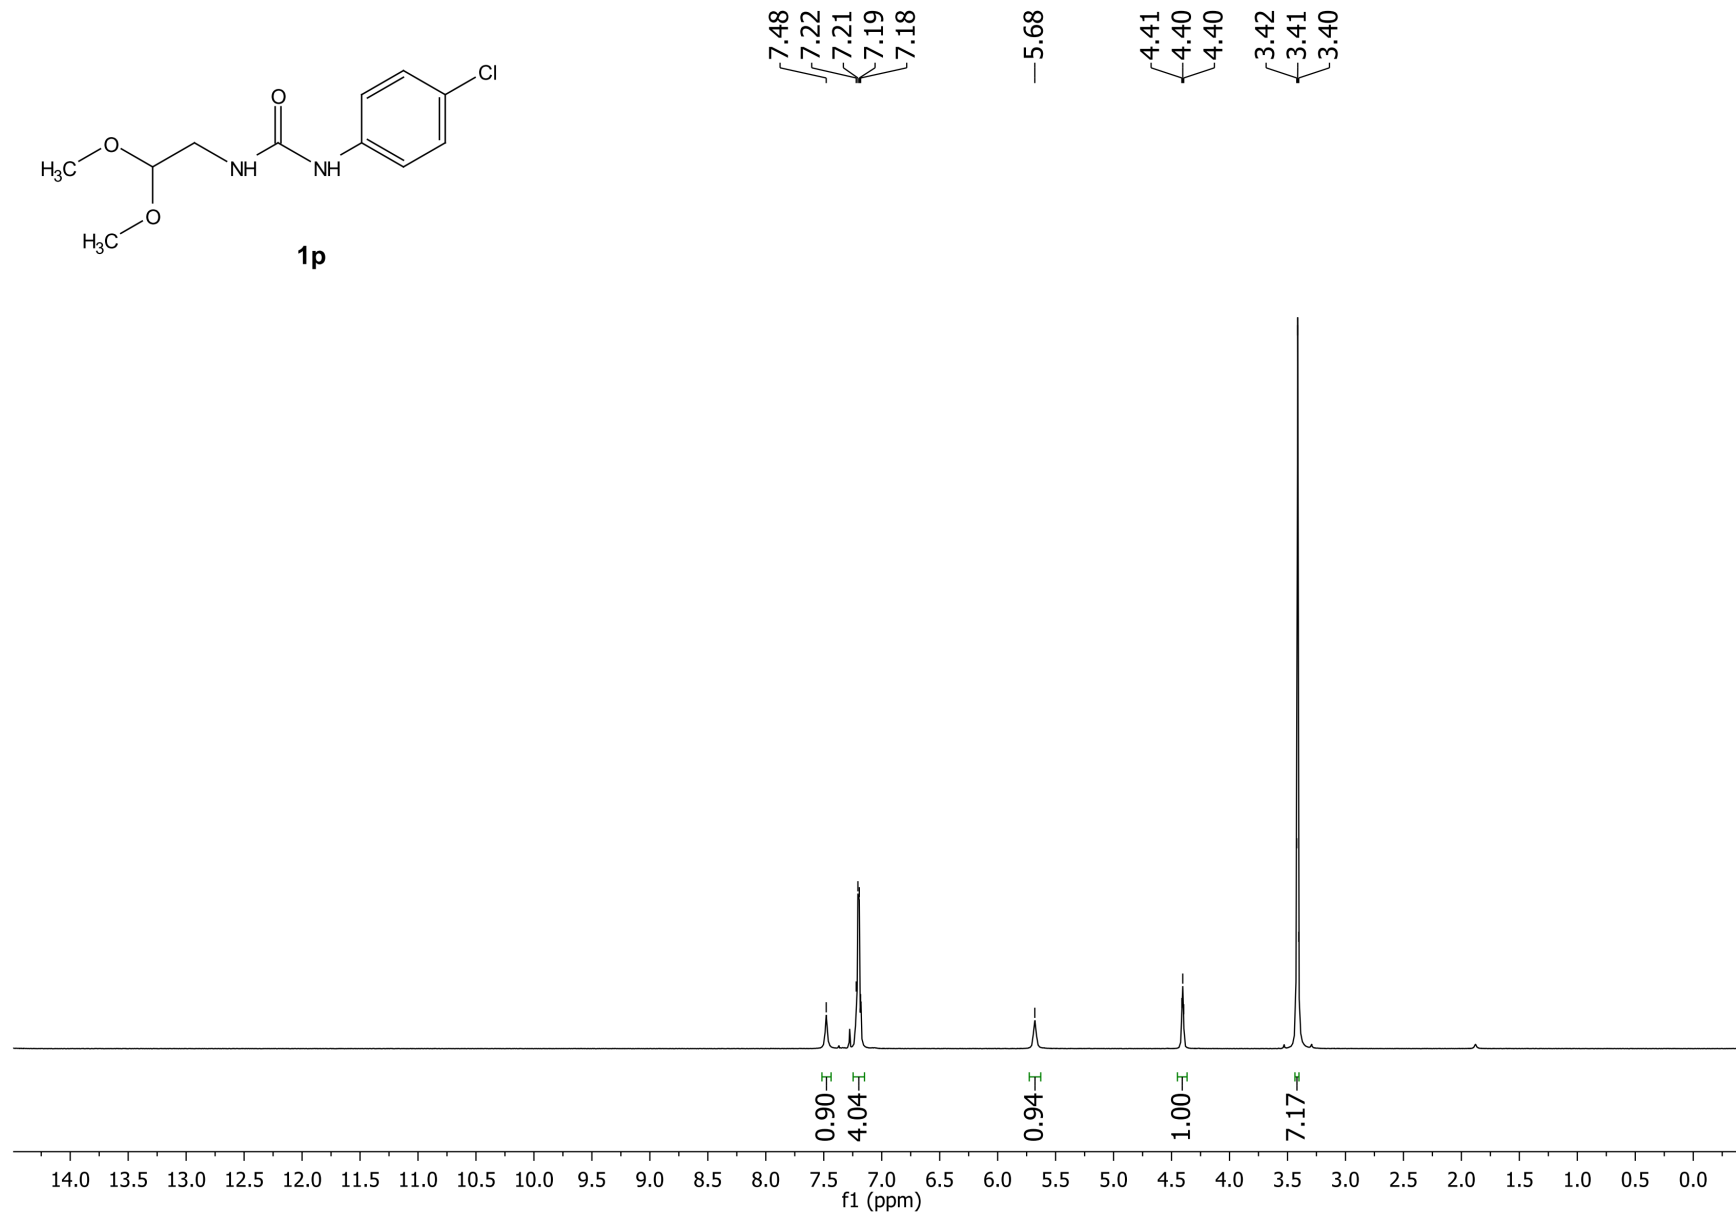

**Figure S62.**  $^1\text{H}$  NMR spectrum (CDCl<sub>3</sub>, 400MHz) of the compound **1p**

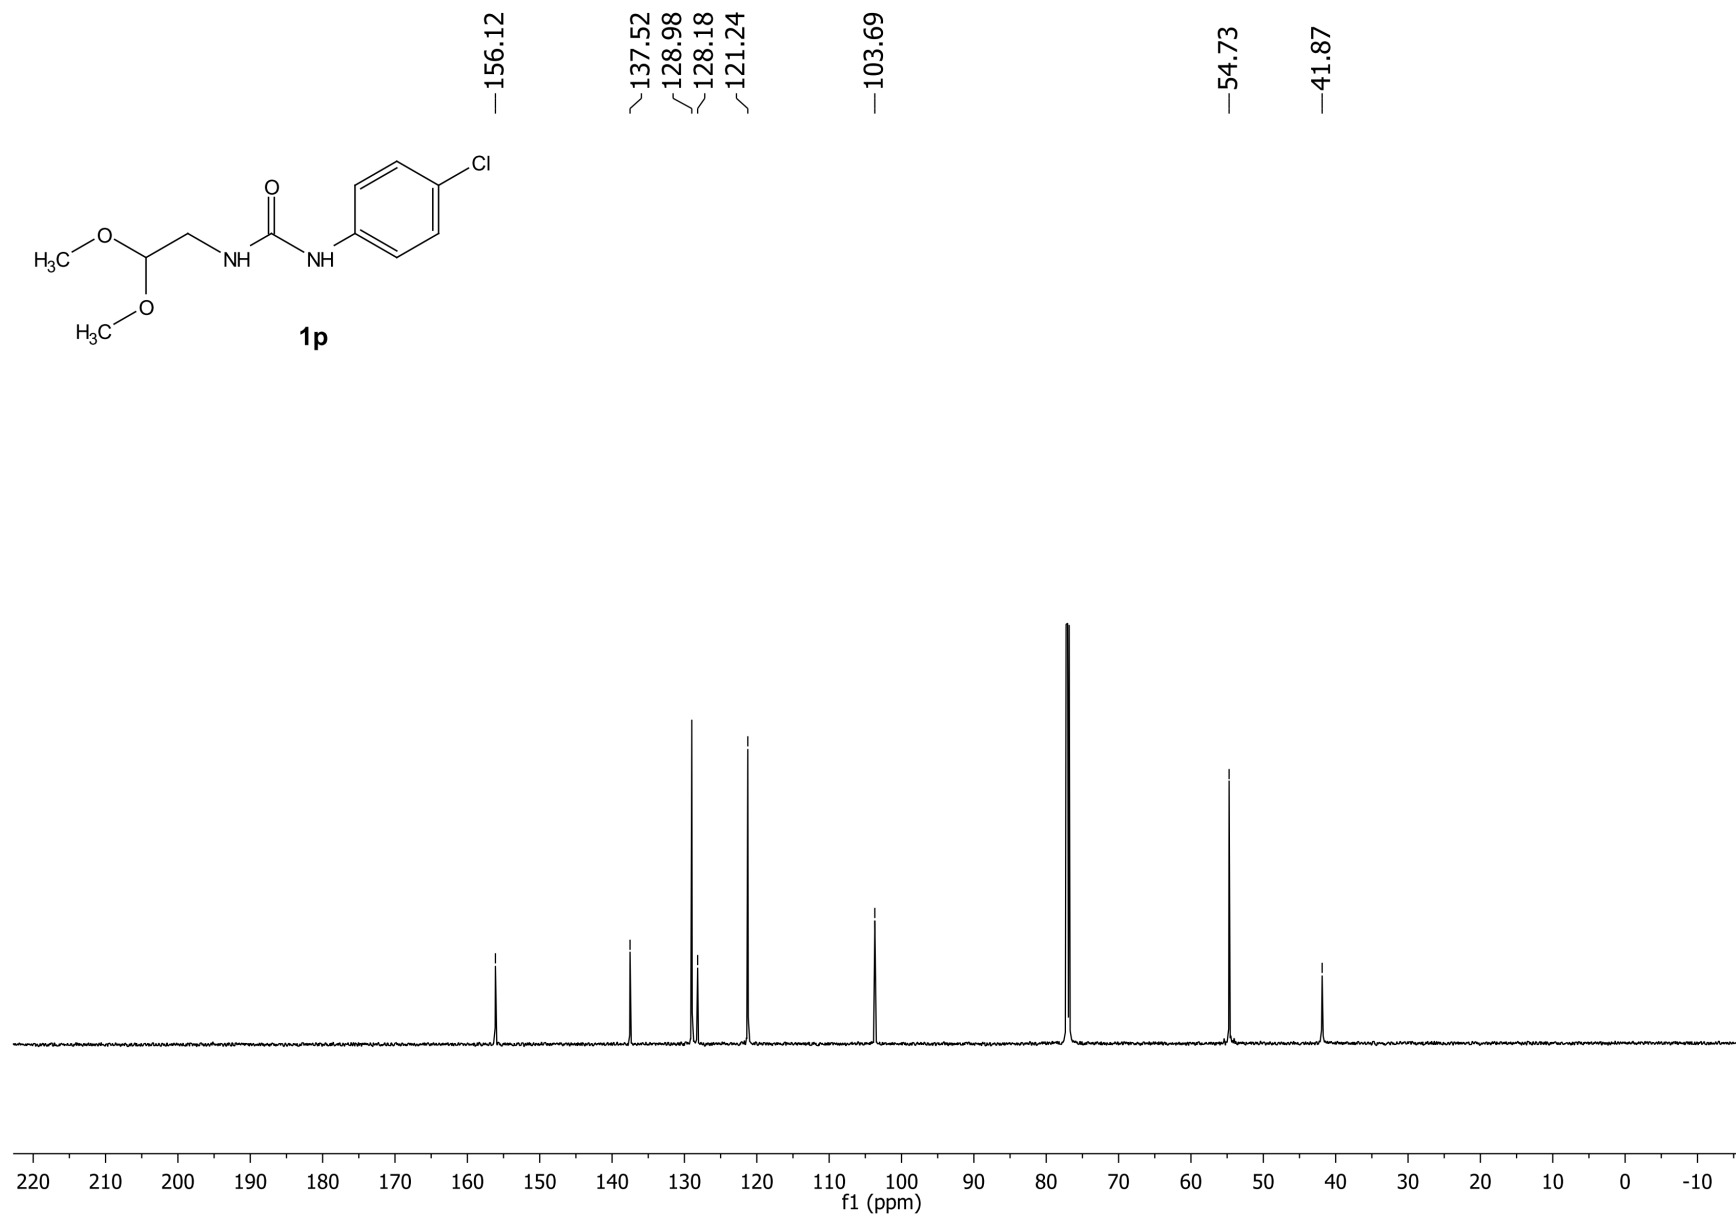

**Figure S63.**  $^{13}\text{C}$  NMR spectrum ( $\text{CDCl}_3$ , 151MHz) of the compound **1p**

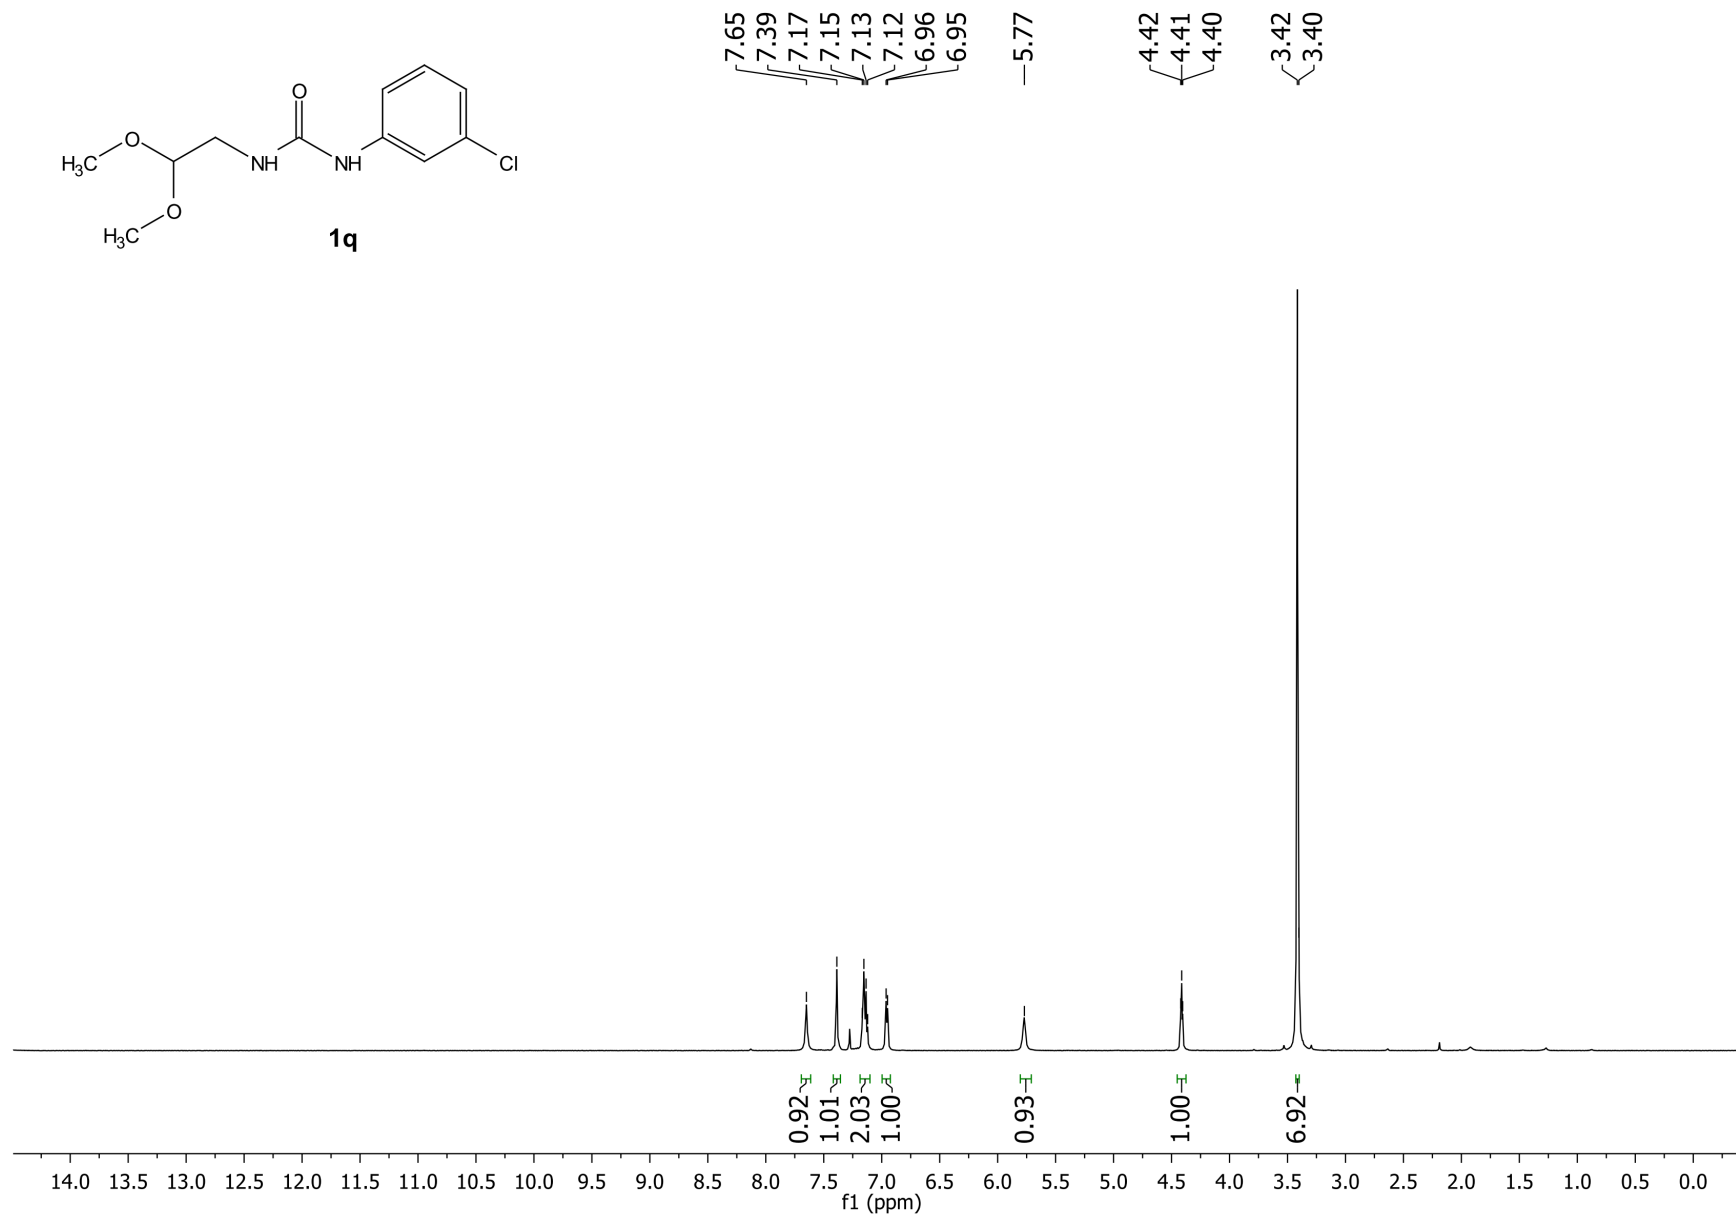

**Figure S64.**  $^1\text{H}$  NMR spectrum ( $\text{CDCl}_3$ , 400MHz) of the compound **1q**

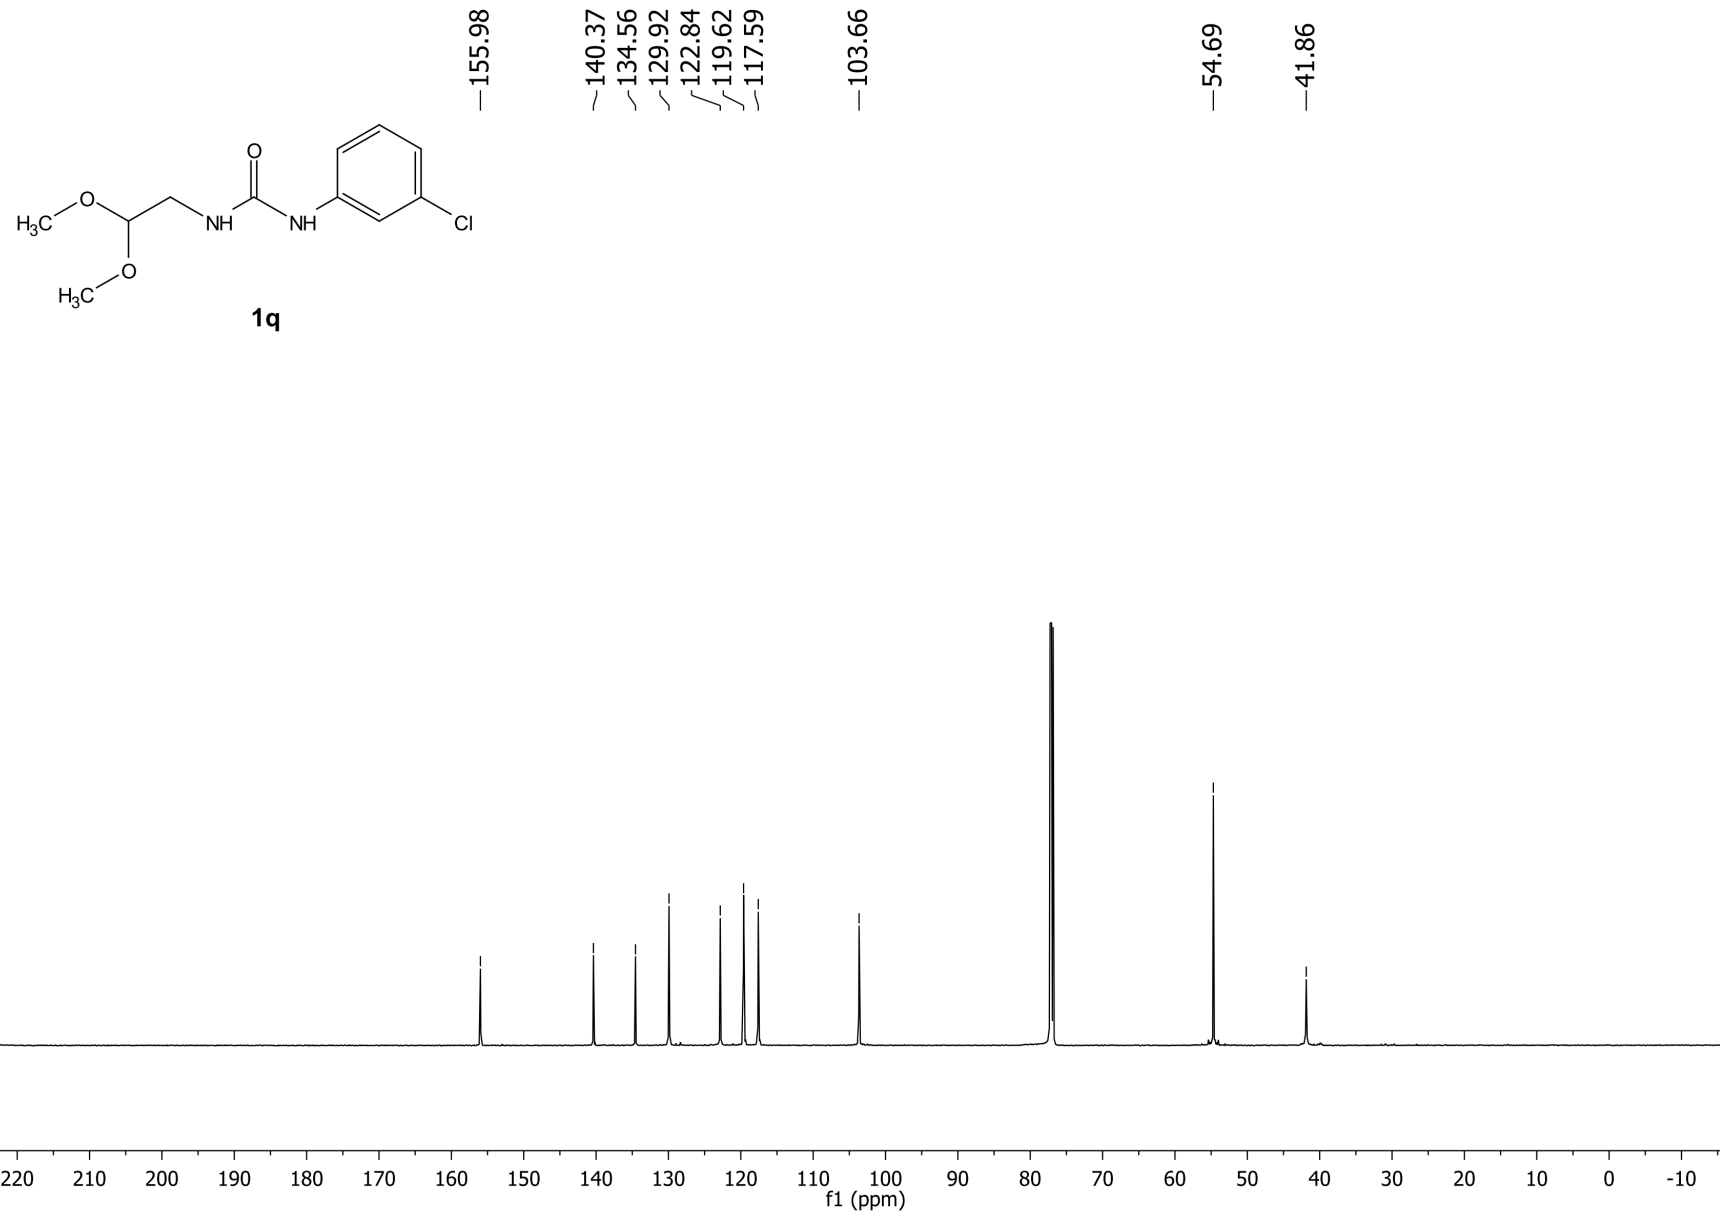

Figure S65.  $^{13}\text{C}$  NMR spectrum ( $\text{CDCl}_3$ , 151MHz) of the compound **1q**

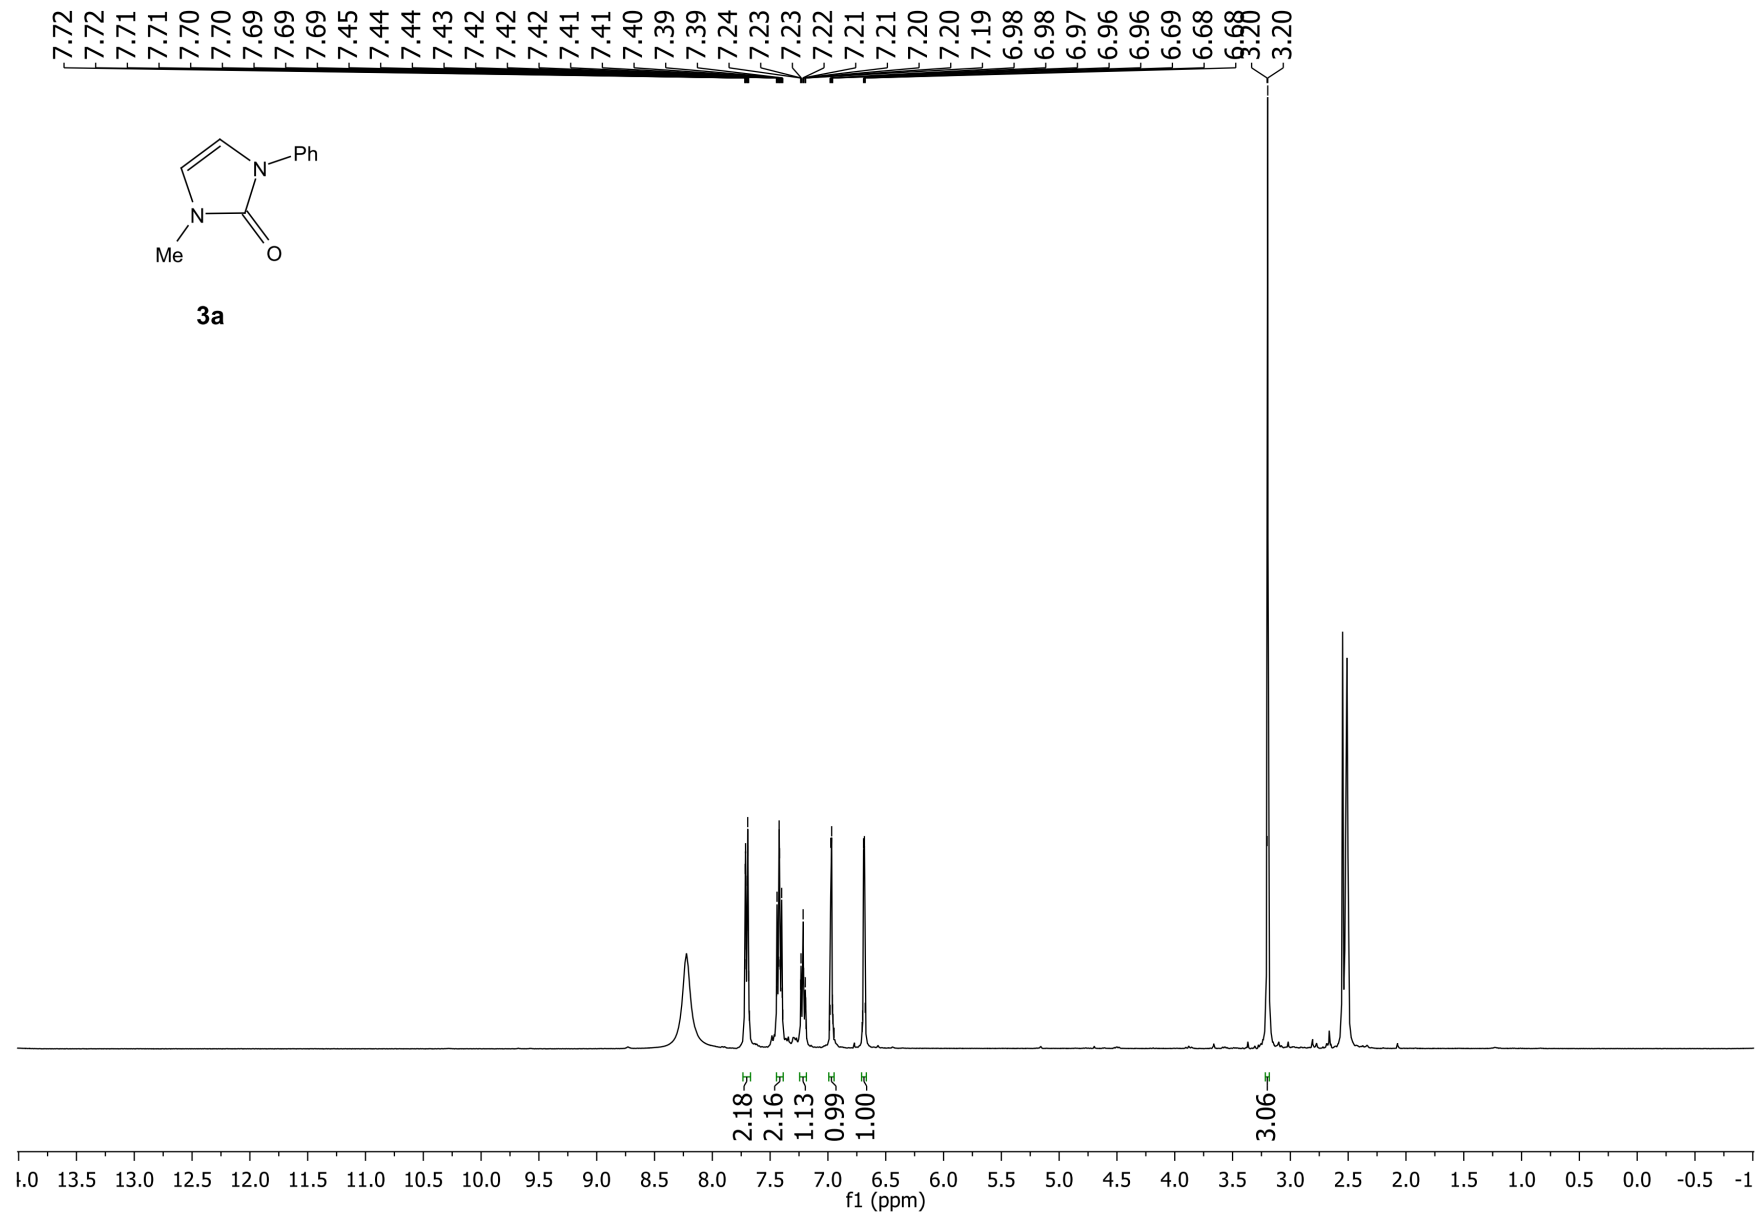

Figure S66. <sup>1</sup>H NMR spectrum ((CD<sub>3</sub>)<sub>2</sub>SO, 400MHz) of the compound **3a**

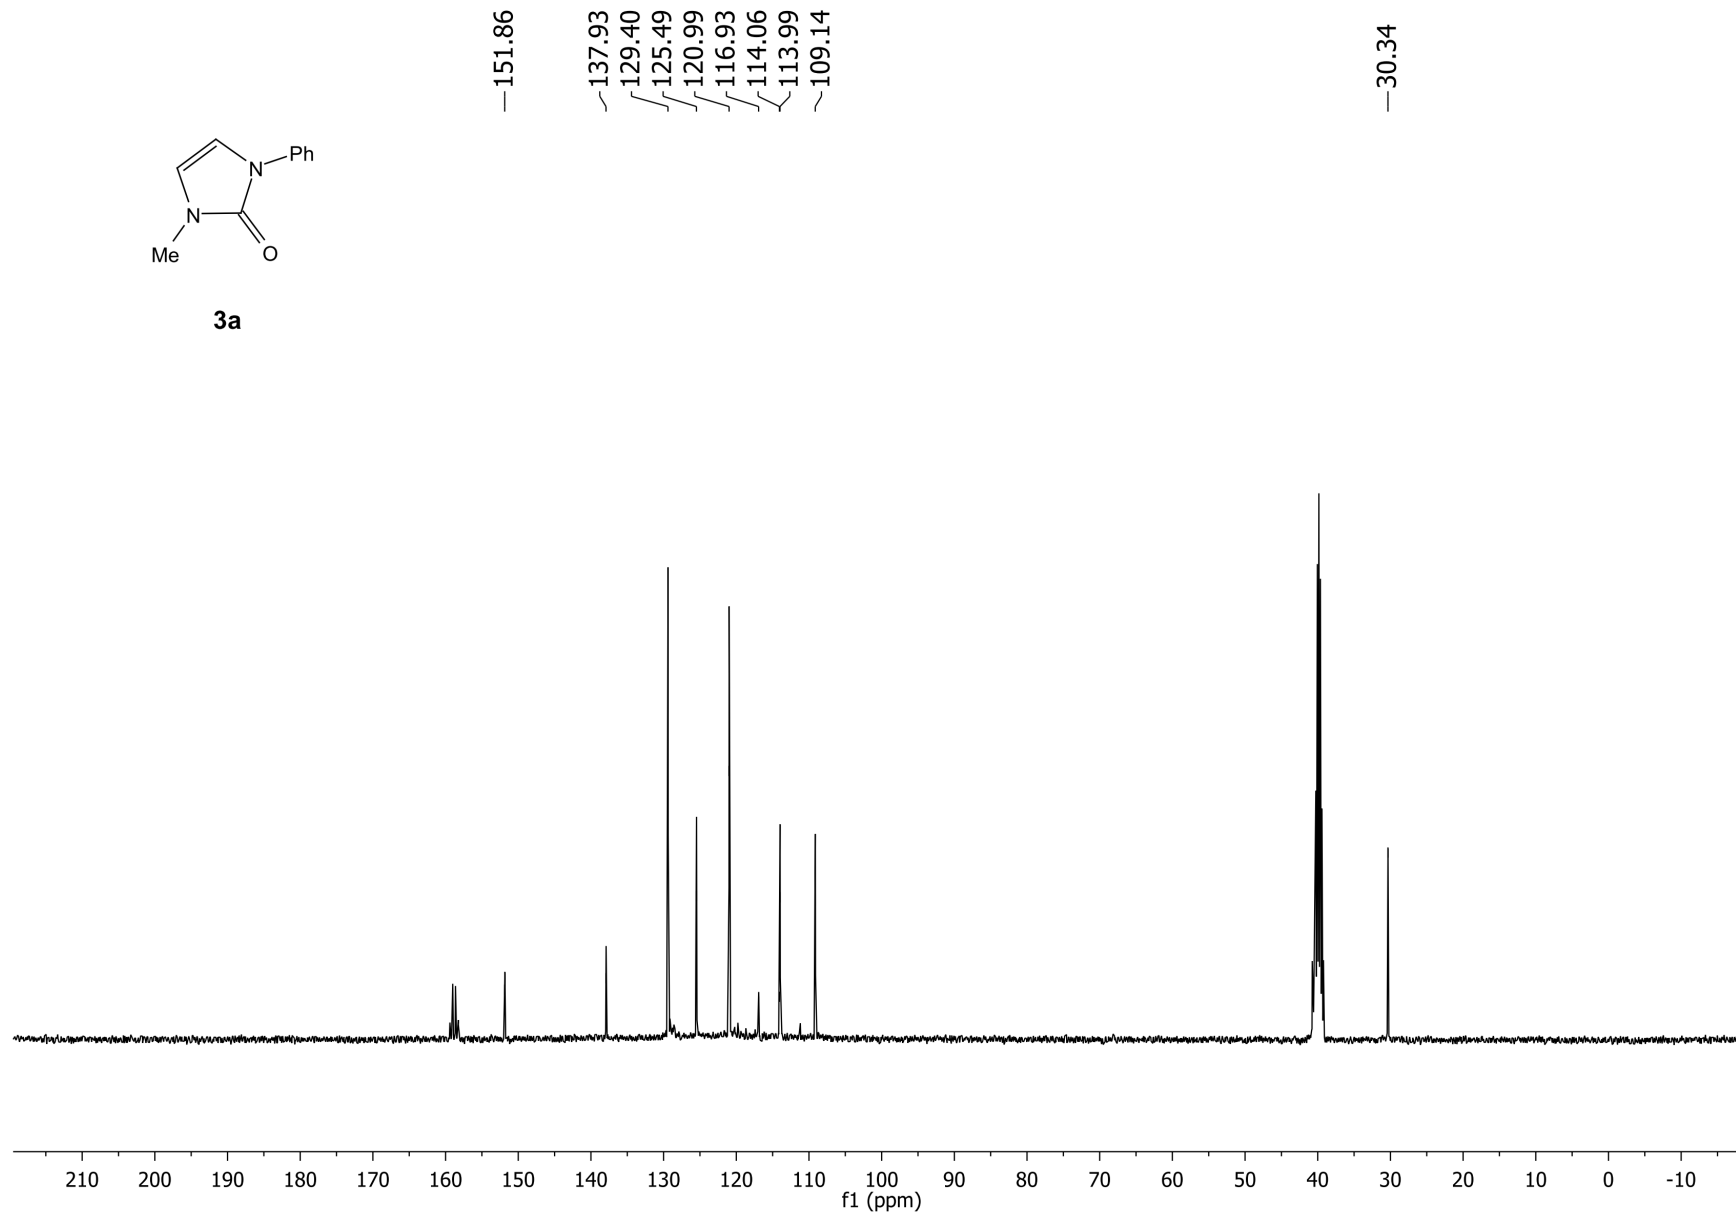

**Figure S67.**  $^{13}\text{C}$  NMR spectrum ((CD<sub>3</sub>)<sub>2</sub>SO, 151MHz) of the compound **3a**

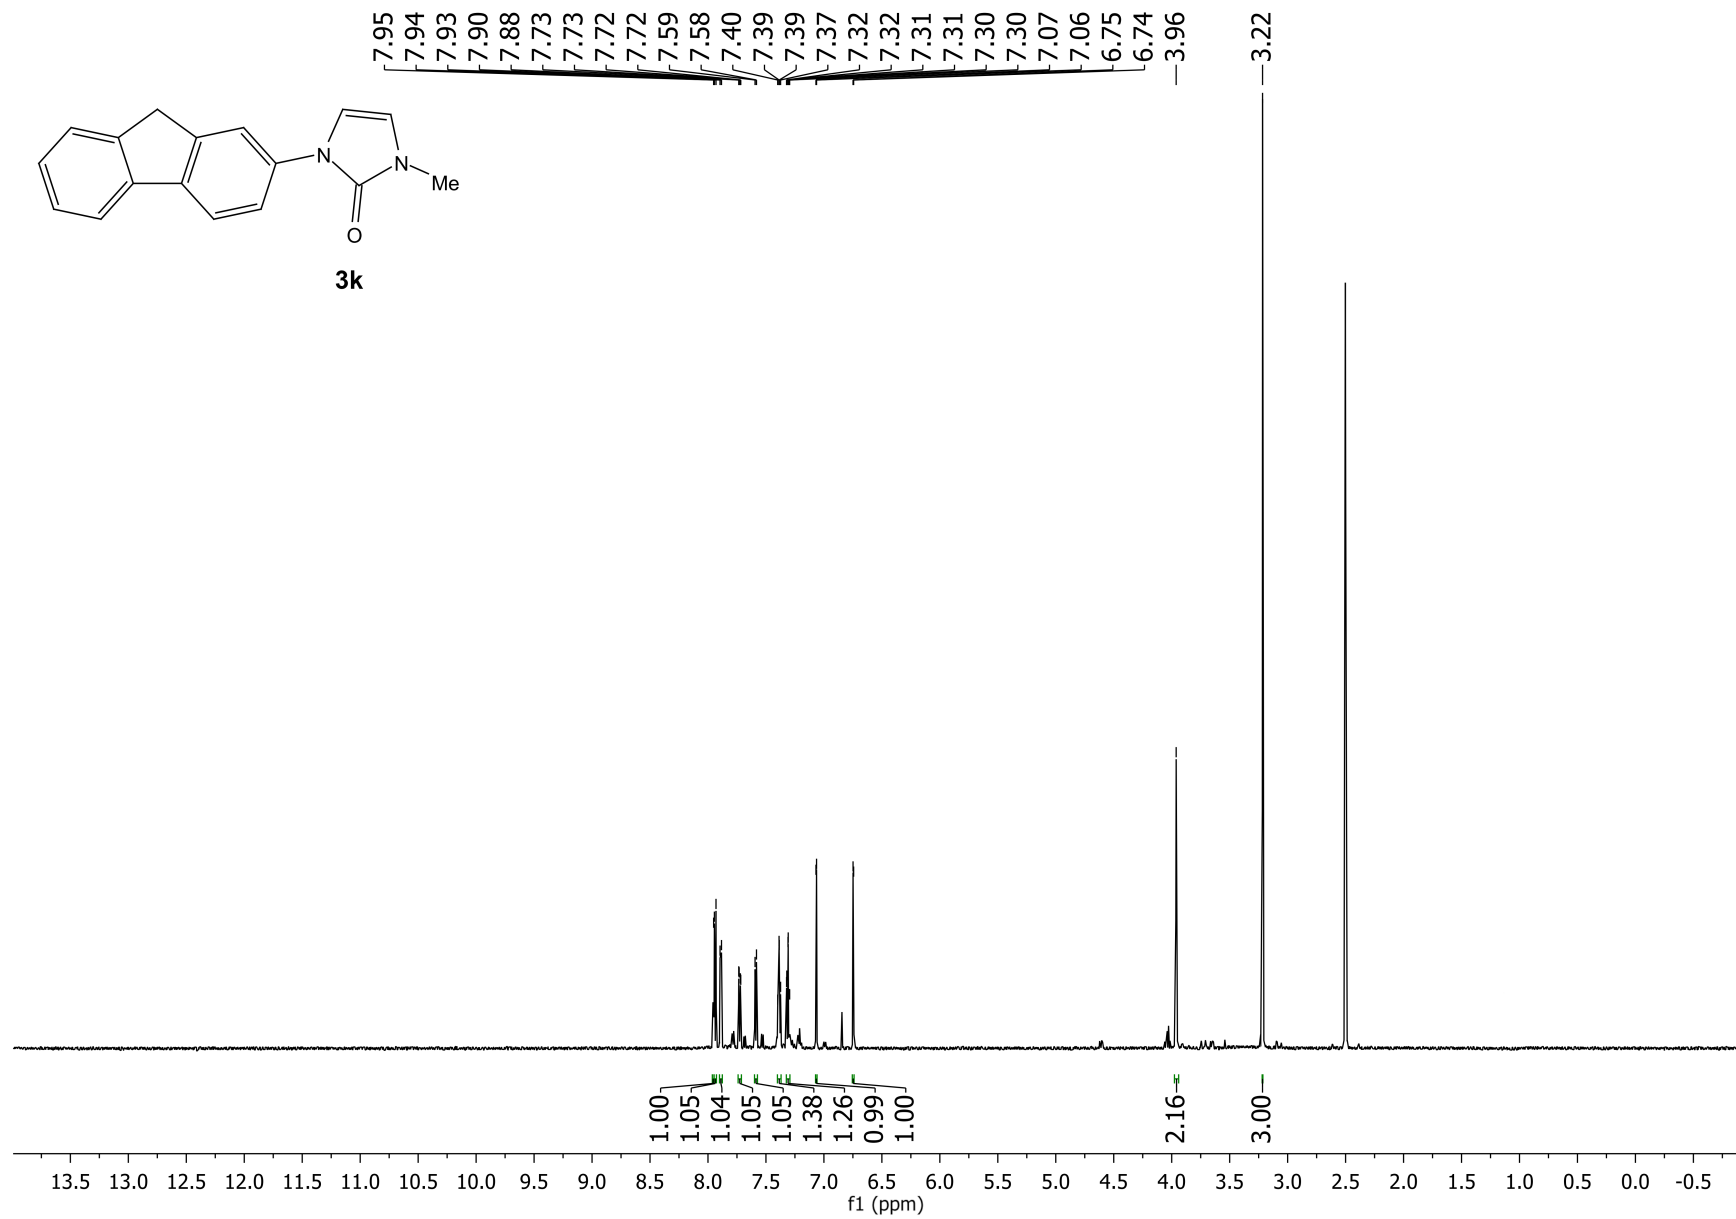

Figure S68. <sup>1</sup>H NMR spectrum (CDCl<sub>3</sub>, 600MHz) of the compound **3k**



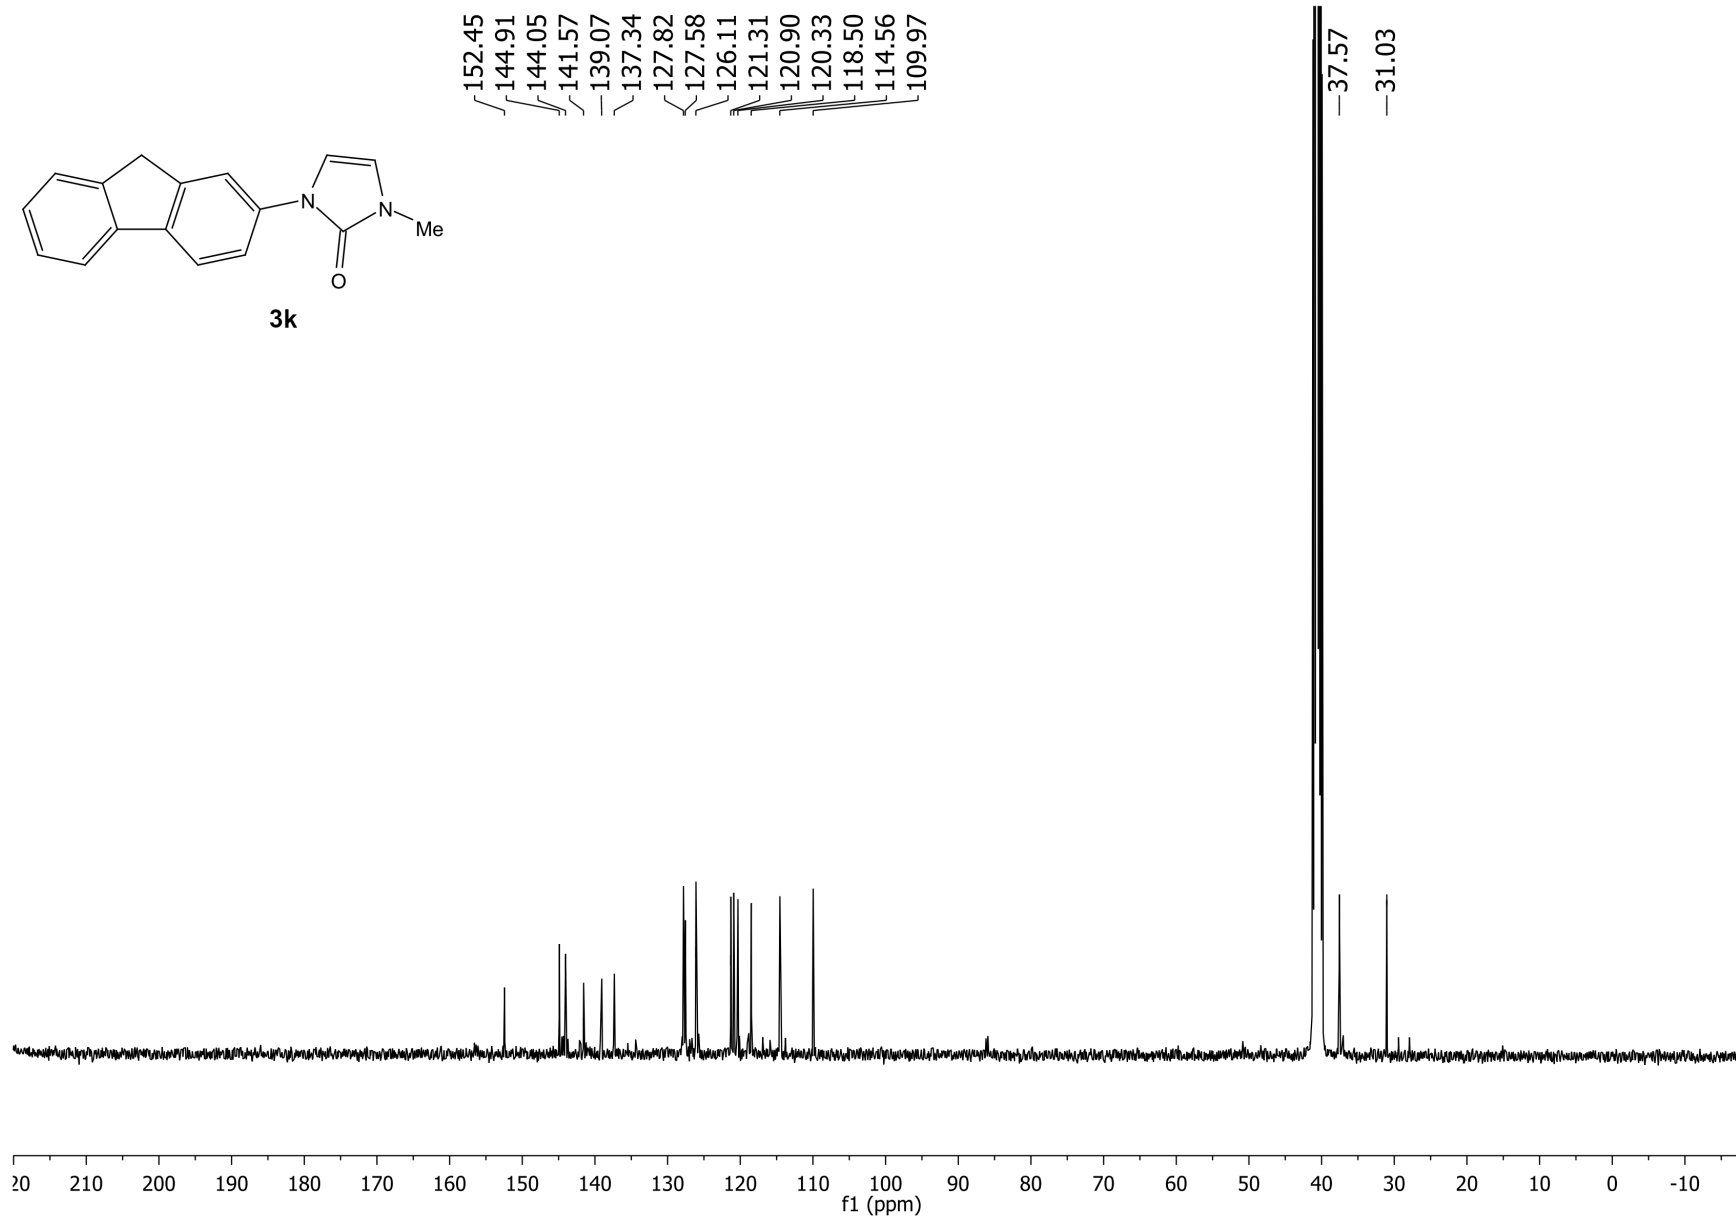

Figure S69. <sup>13</sup>C NMR spectrum (CDCl<sub>3</sub>, 151MHz) of the compound **3k**

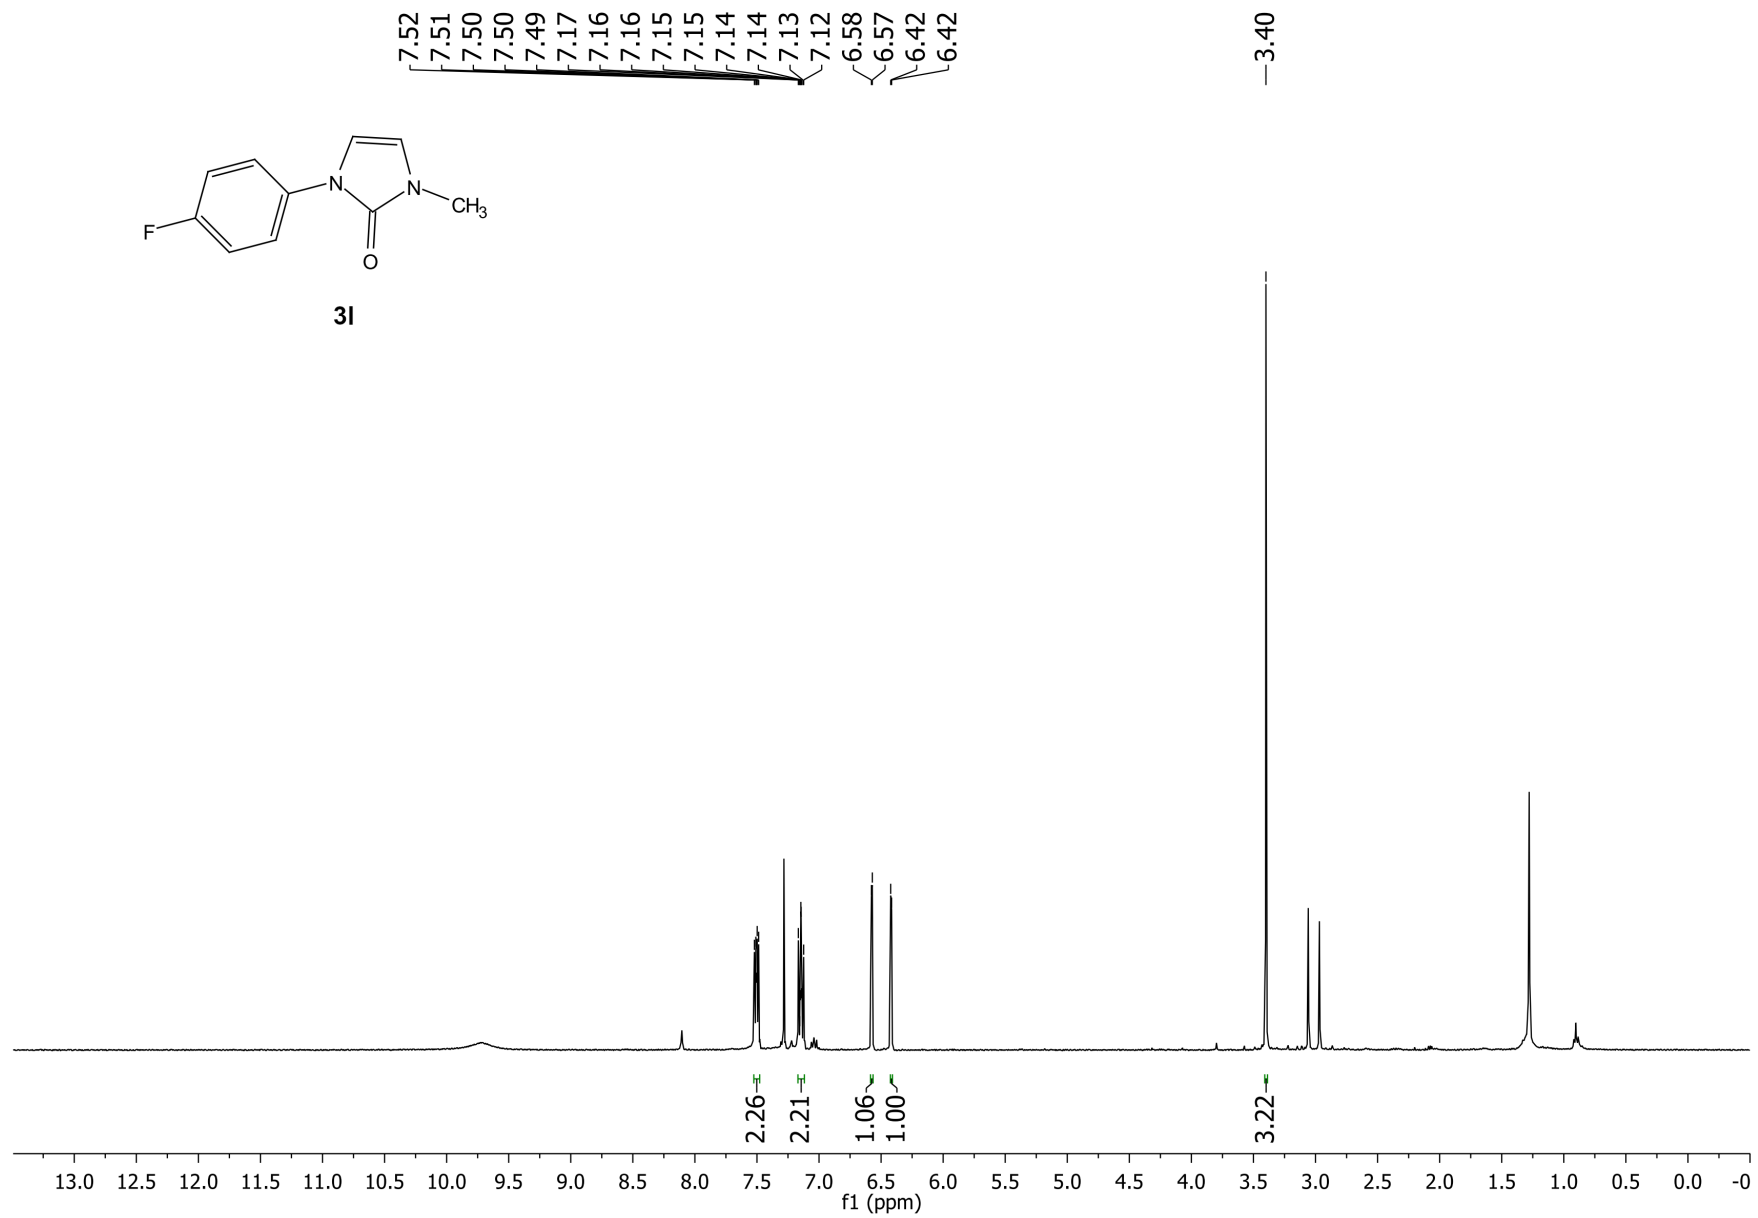

Figure S70.  $^1\text{H}$  NMR spectrum (CDCl<sub>3</sub>, 400MHz) of the compound **3I**

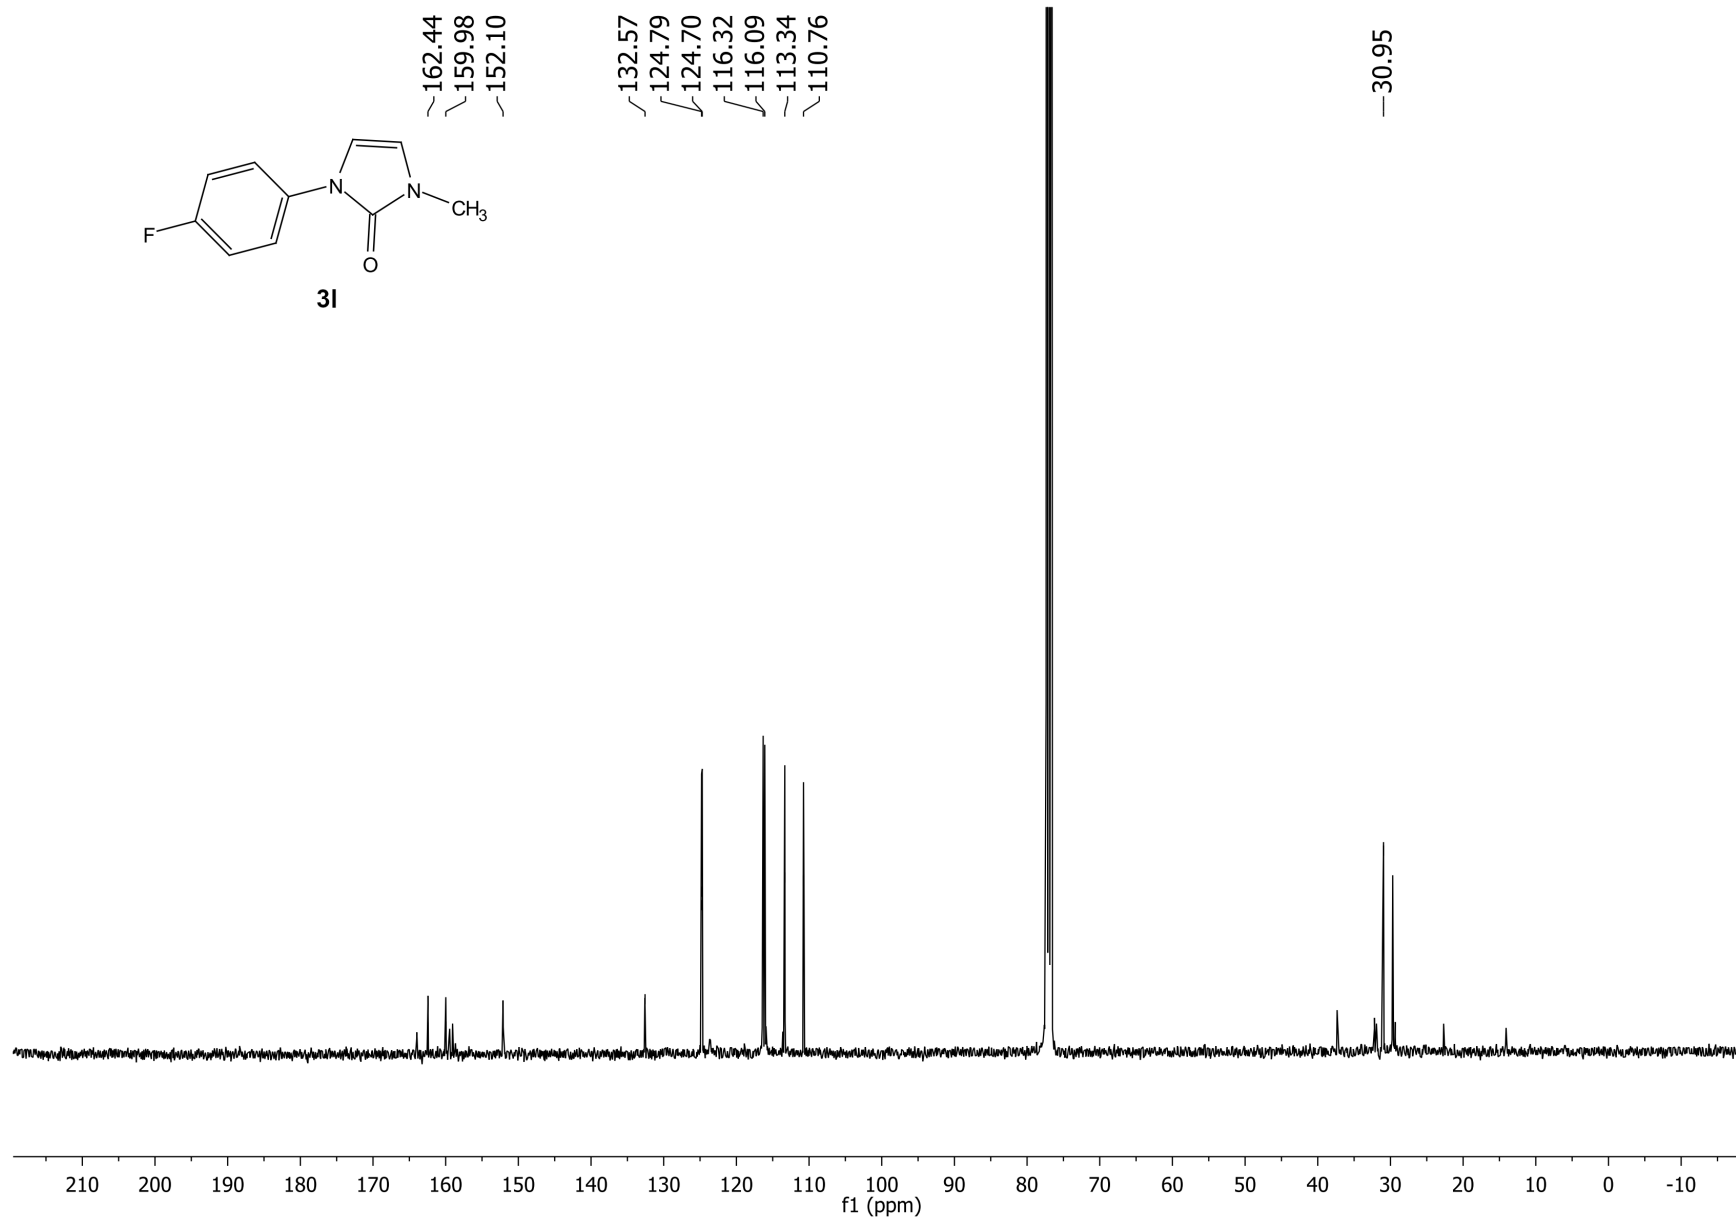

**Figure S71.**  $^{13}\text{C}$  NMR spectrum ( $\text{CDCl}_3$ , 151MHz) of the compound **3l**

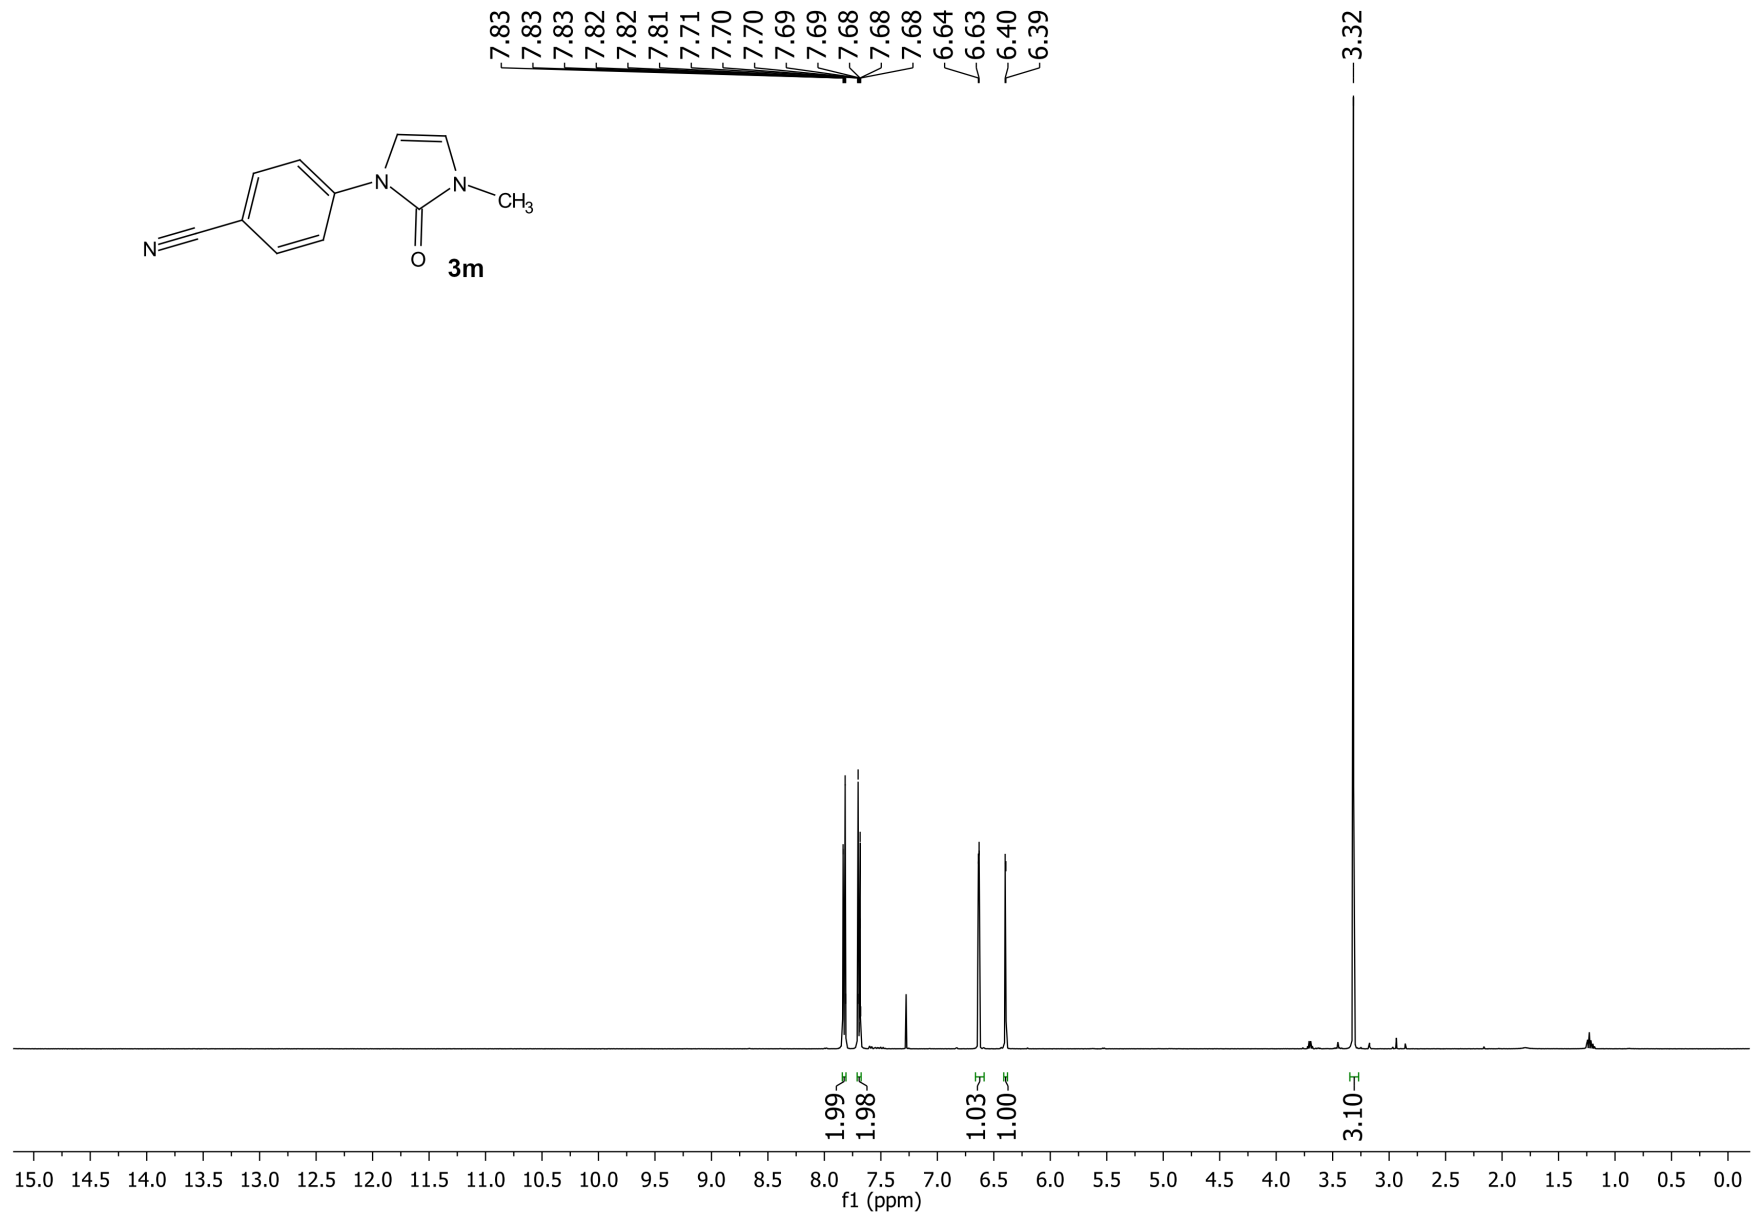

Figure S72. <sup>1</sup>H NMR spectrum (CDCl<sub>3</sub>, 500MHz) of the compound **3m**

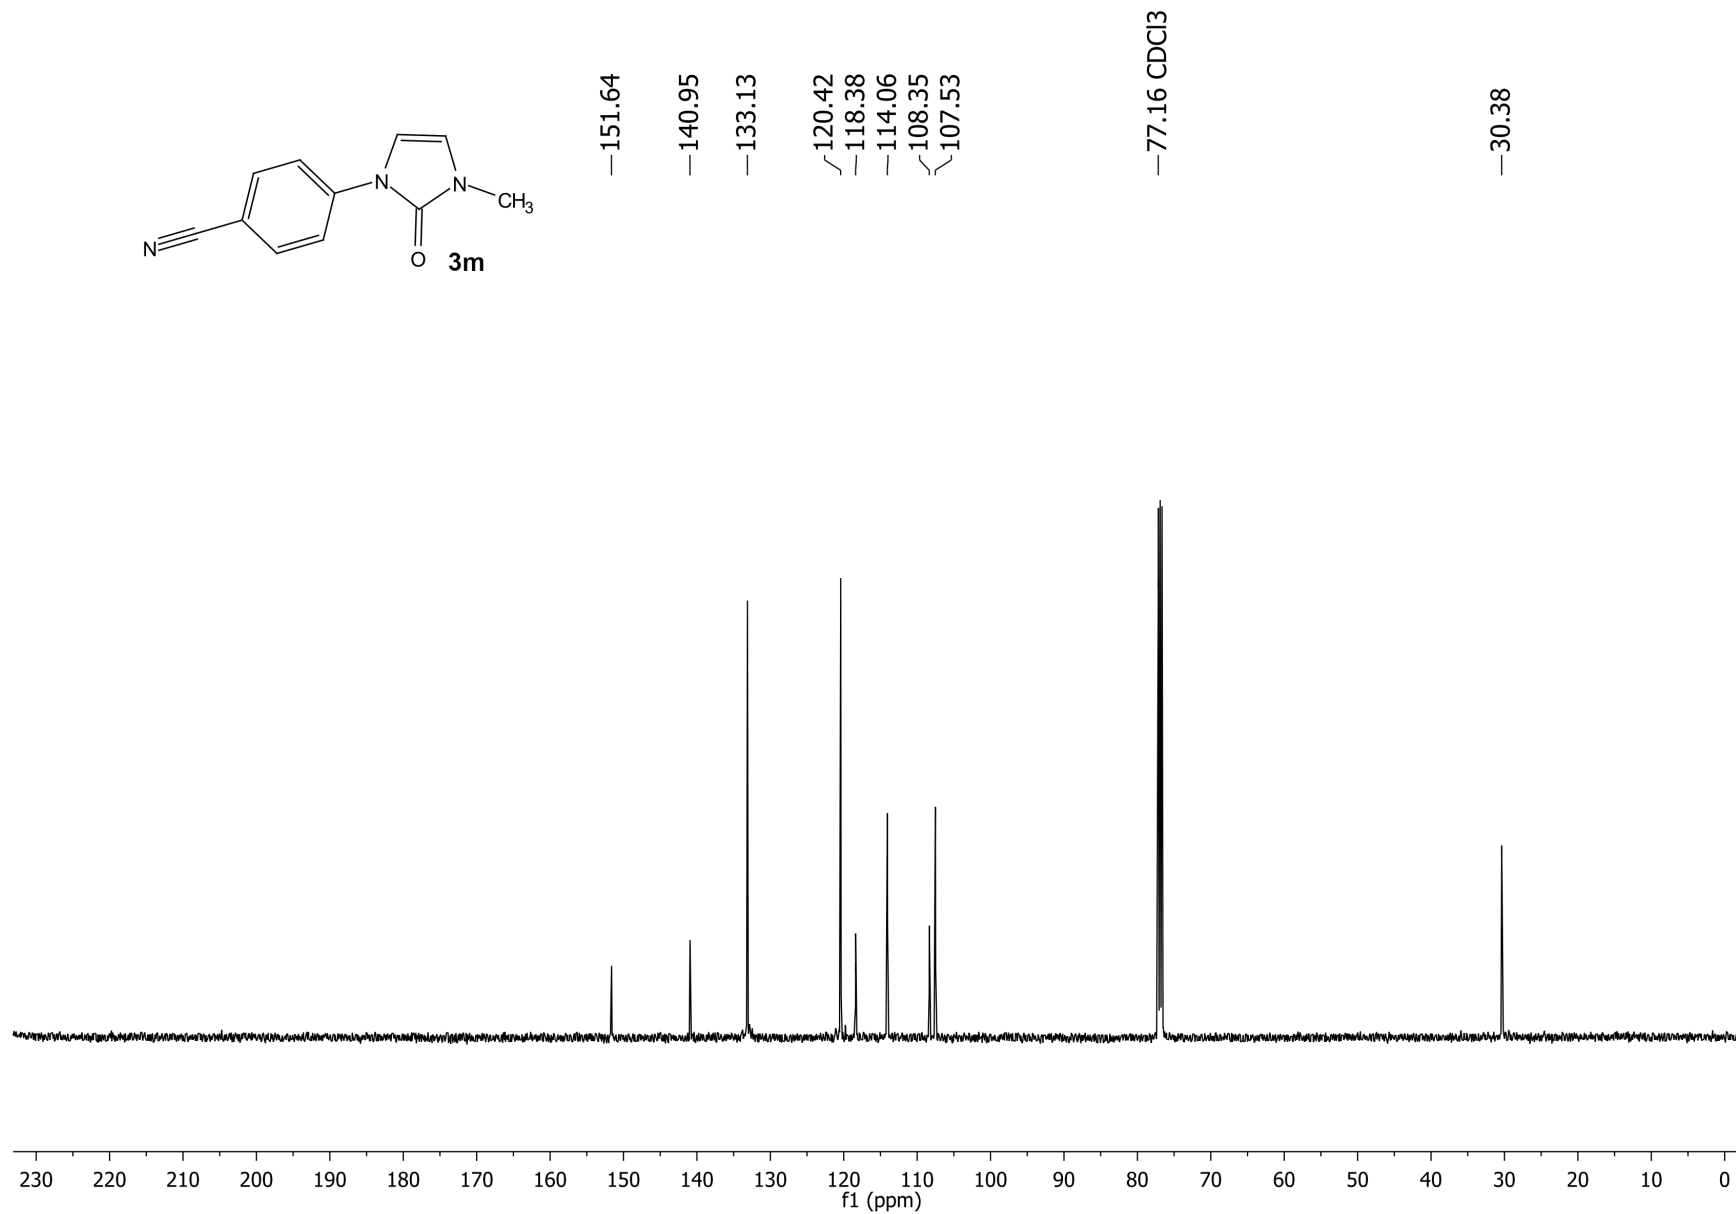

Figure S73. <sup>13</sup>C NMR spectrum (CDCl<sub>3</sub>, 151MHz) of the compound **3m**

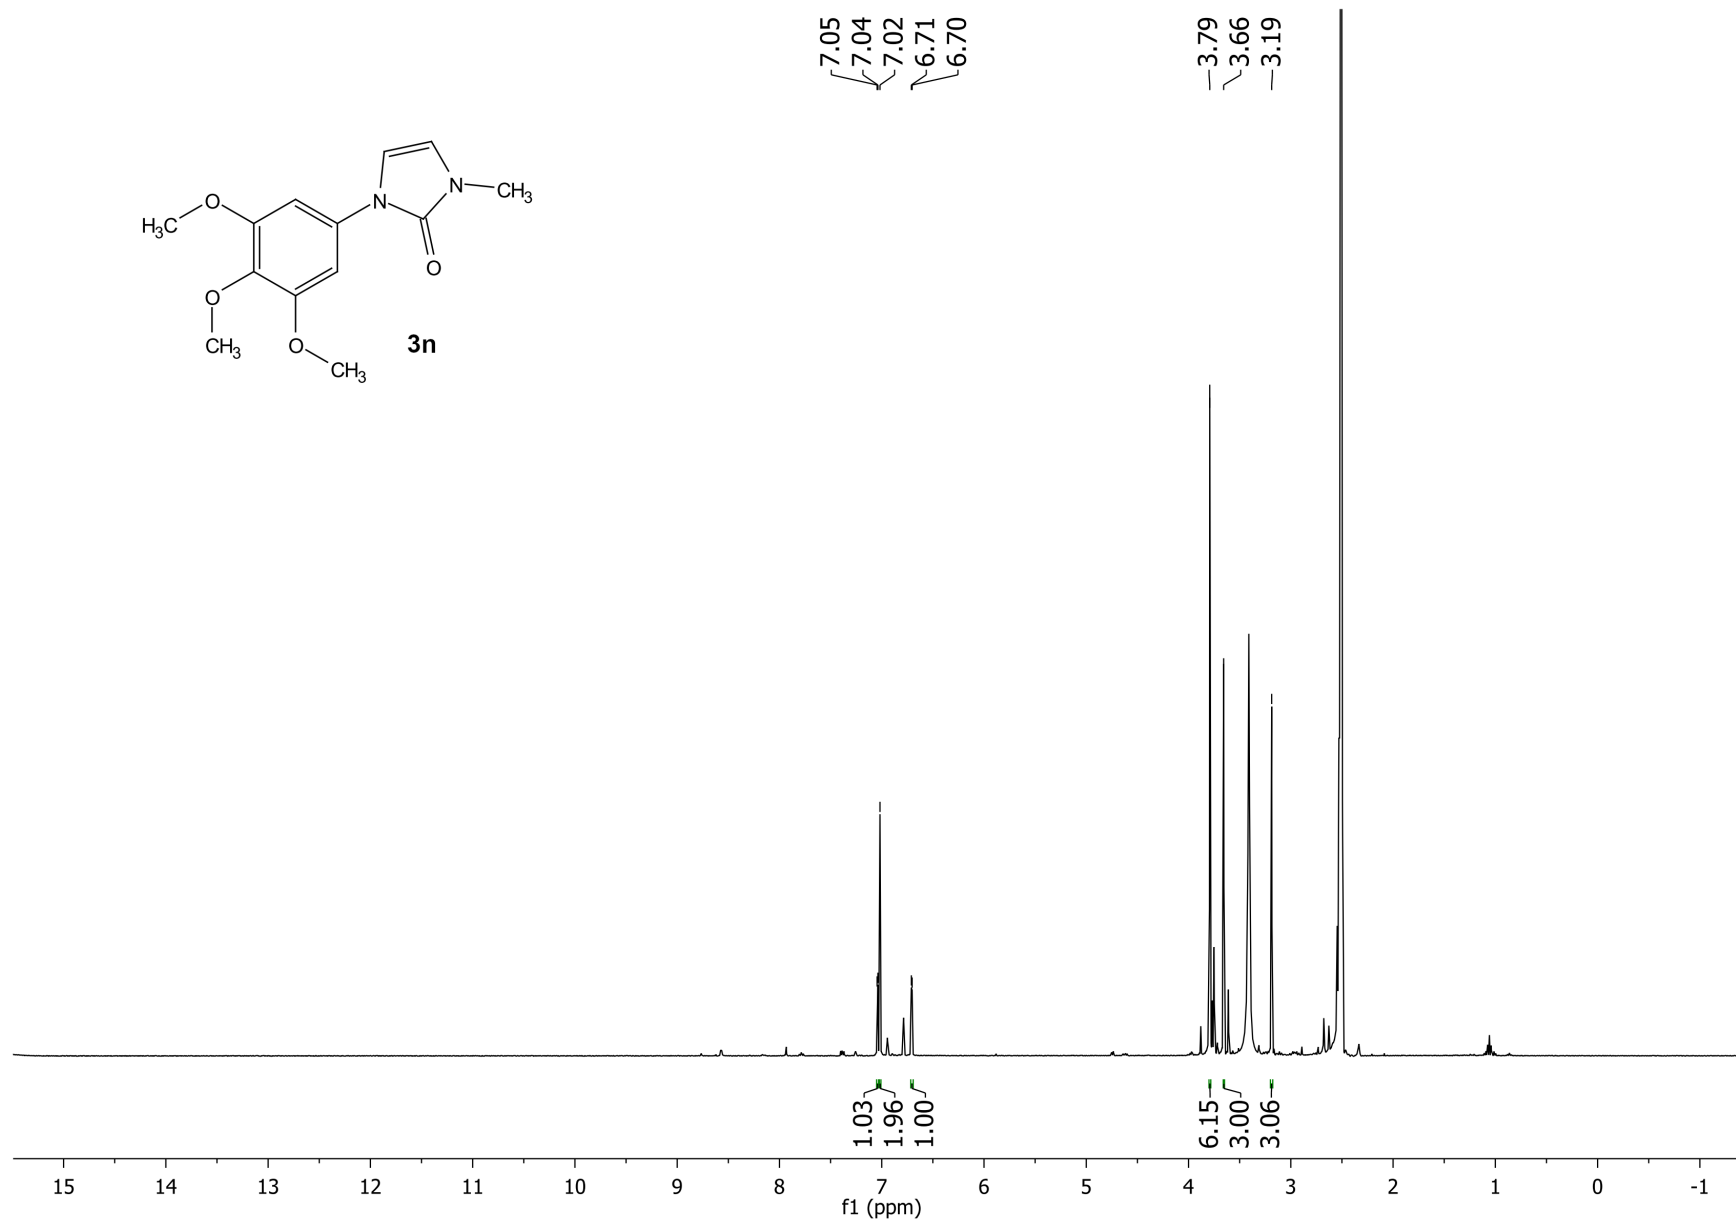

Figure S74.  $^1\text{H}$  NMR spectrum ((CD<sub>3</sub>)<sub>2</sub>SO, 400MHz) of the compound **3n**

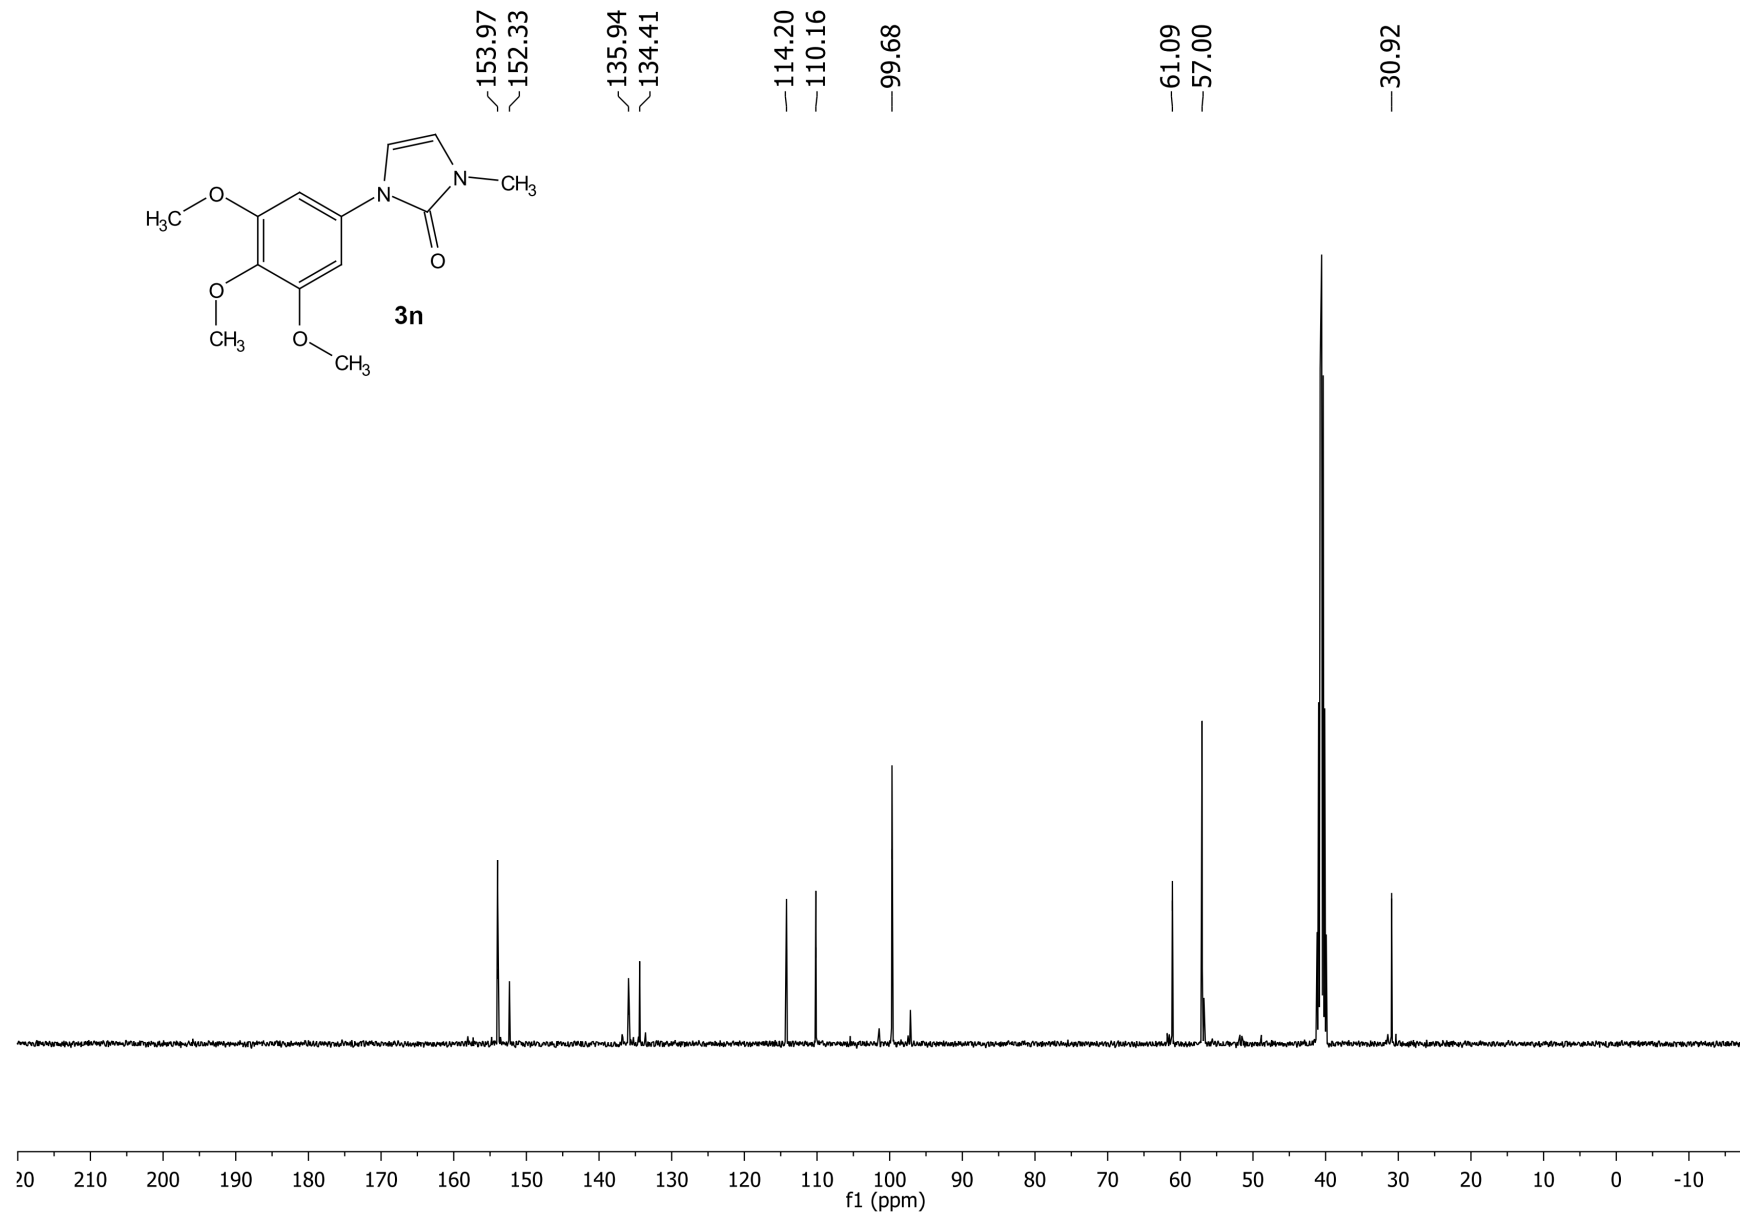

Figure S75. <sup>13</sup>C NMR spectrum ((CD<sub>3</sub>)<sub>2</sub>SO, 151MHz) of the compound **3n**

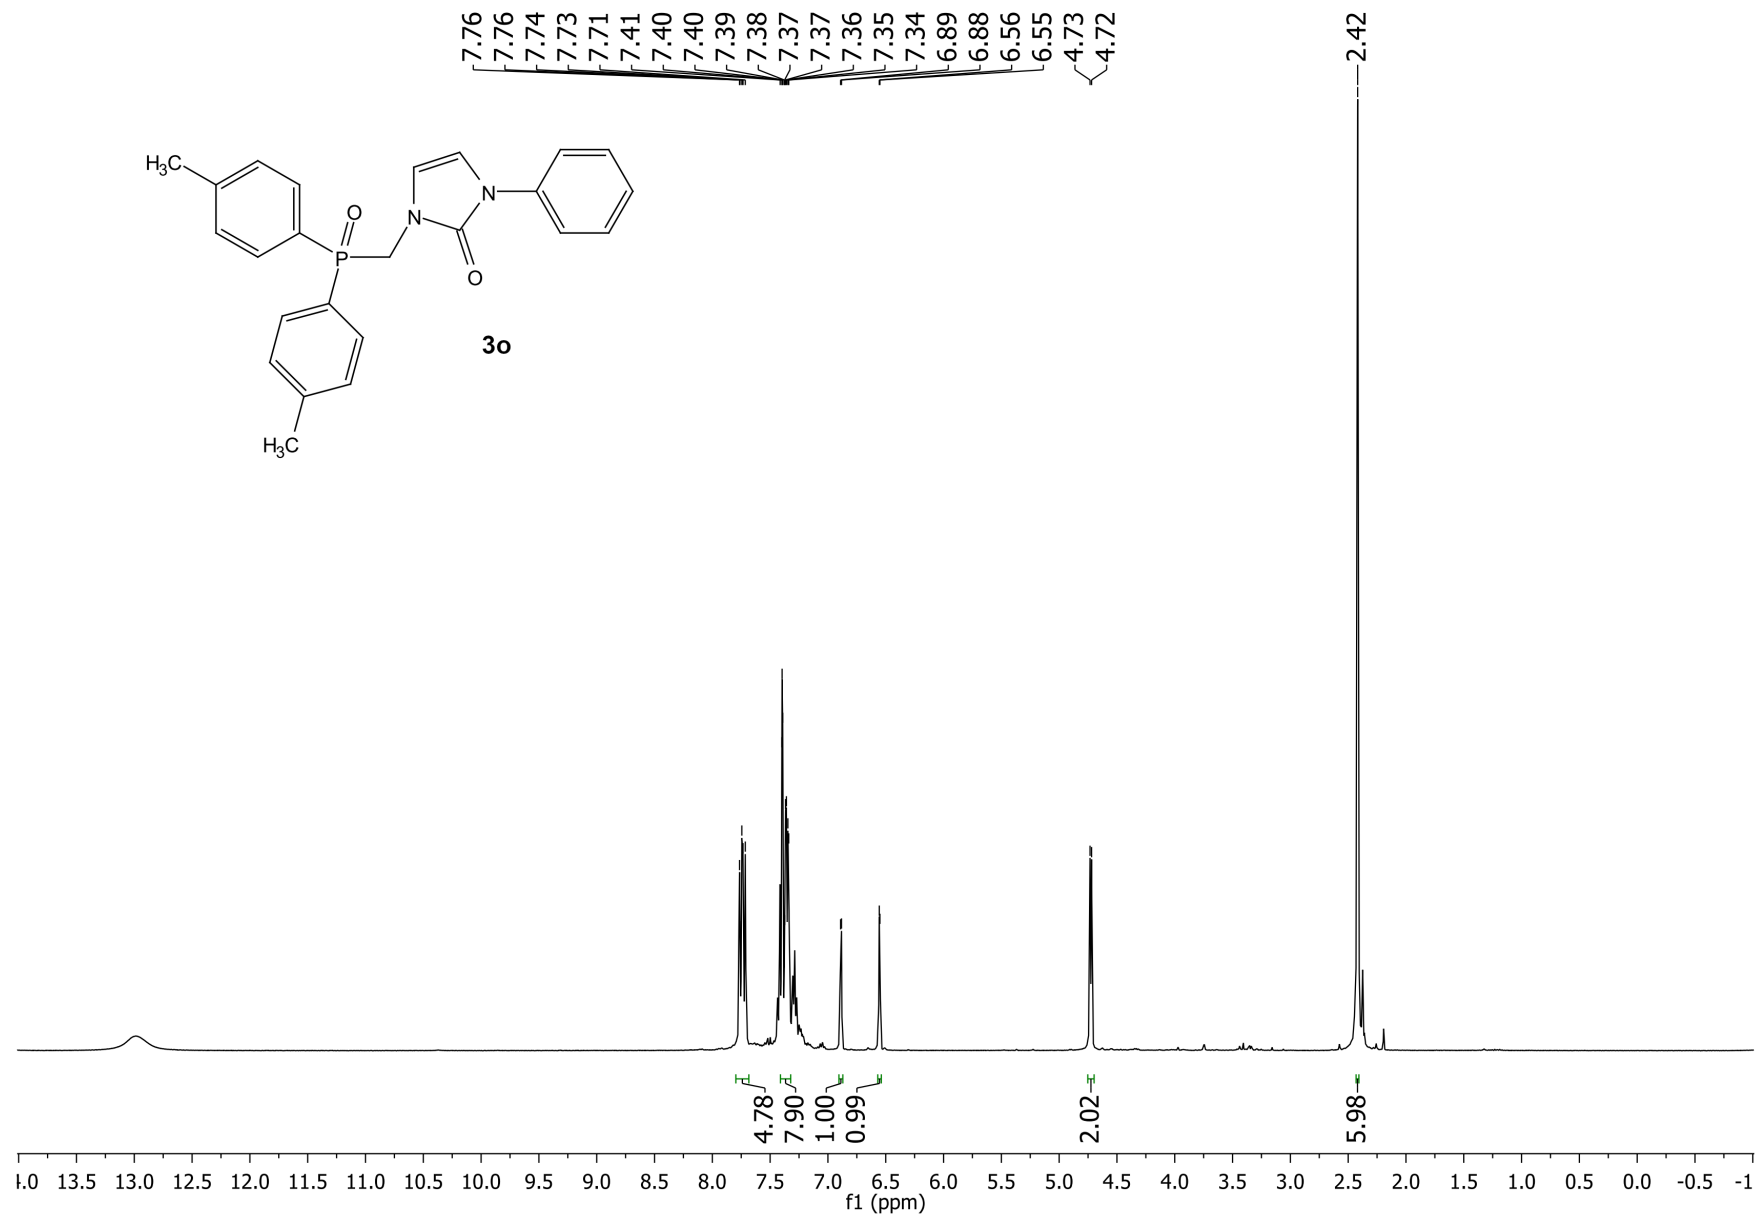

**Figure S76.** <sup>1</sup>H NMR spectrum (CDCl<sub>3</sub>, 400MHz) of the compound **3o**



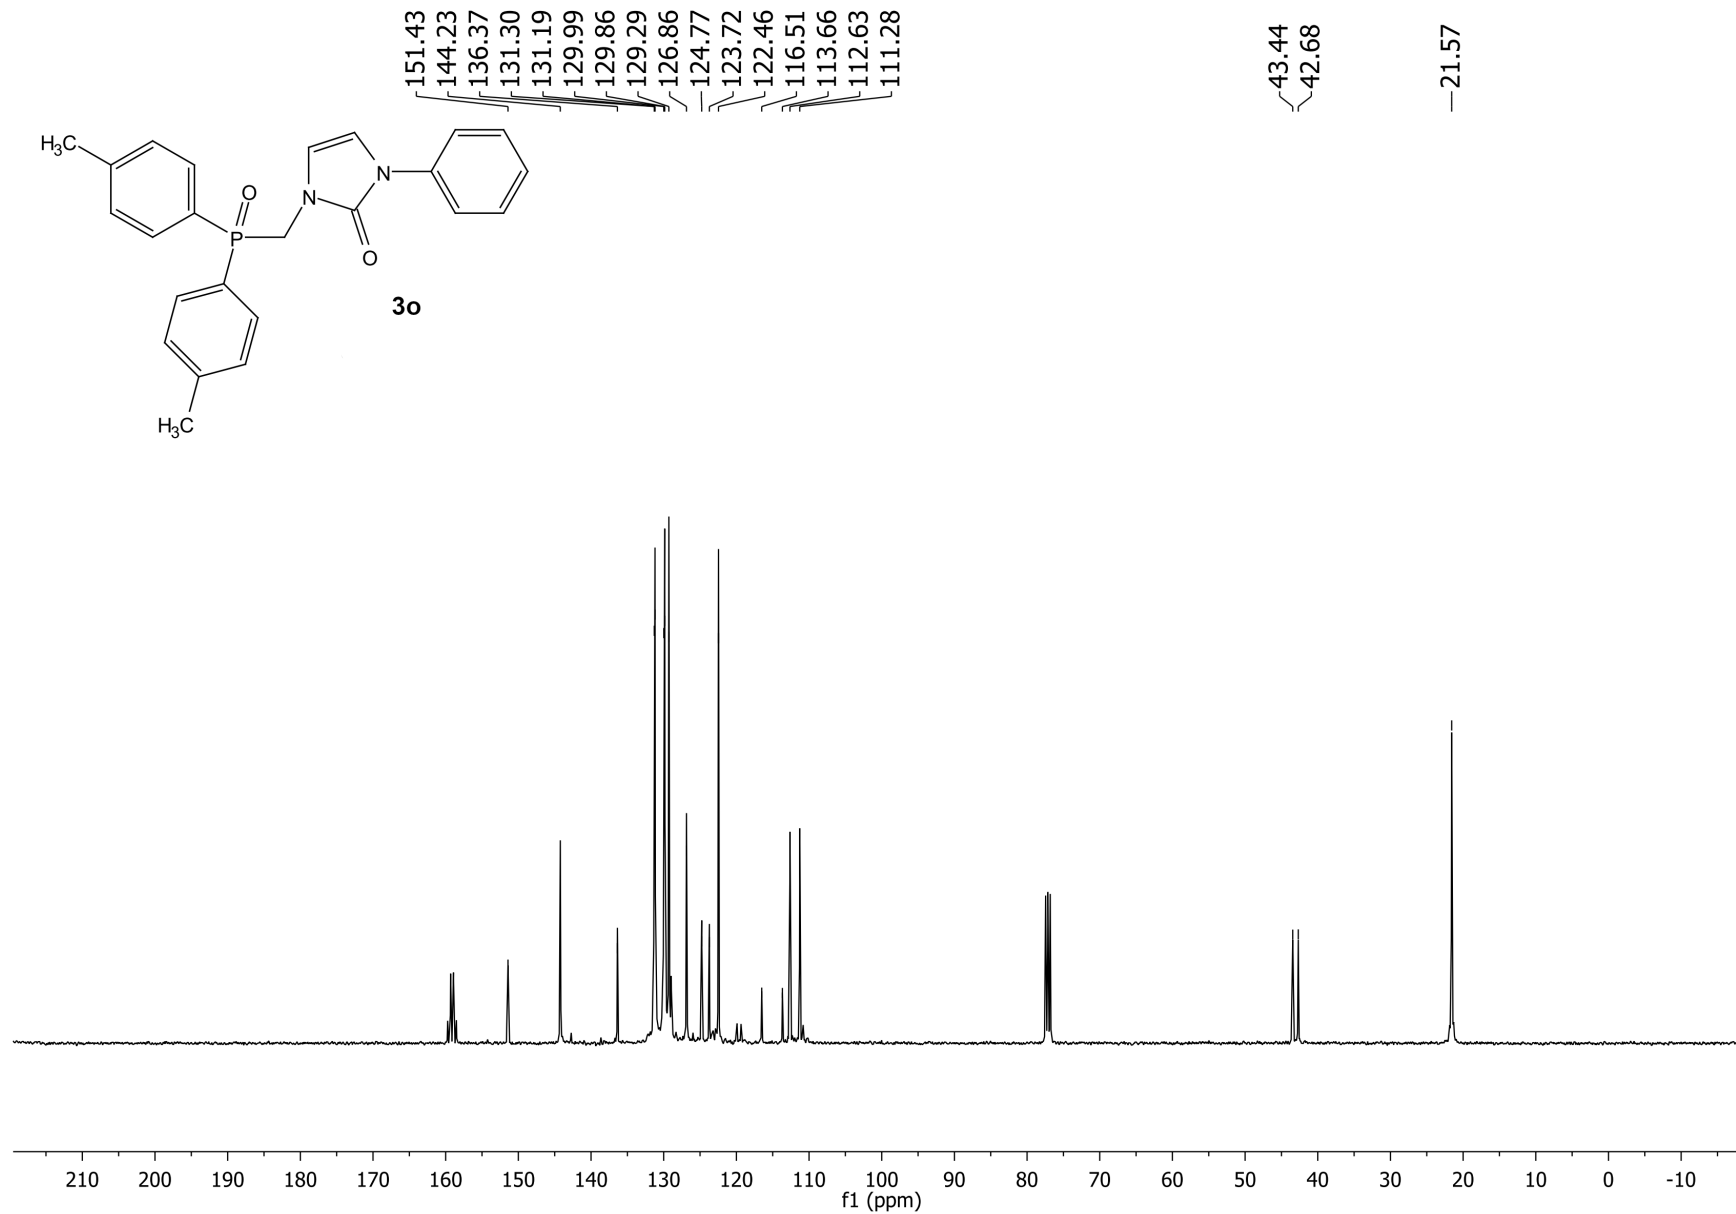

Figure S77.  $^{13}\text{C}$  NMR spectrum (CDCl<sub>3</sub>, 151MHz) of the compound **3o**

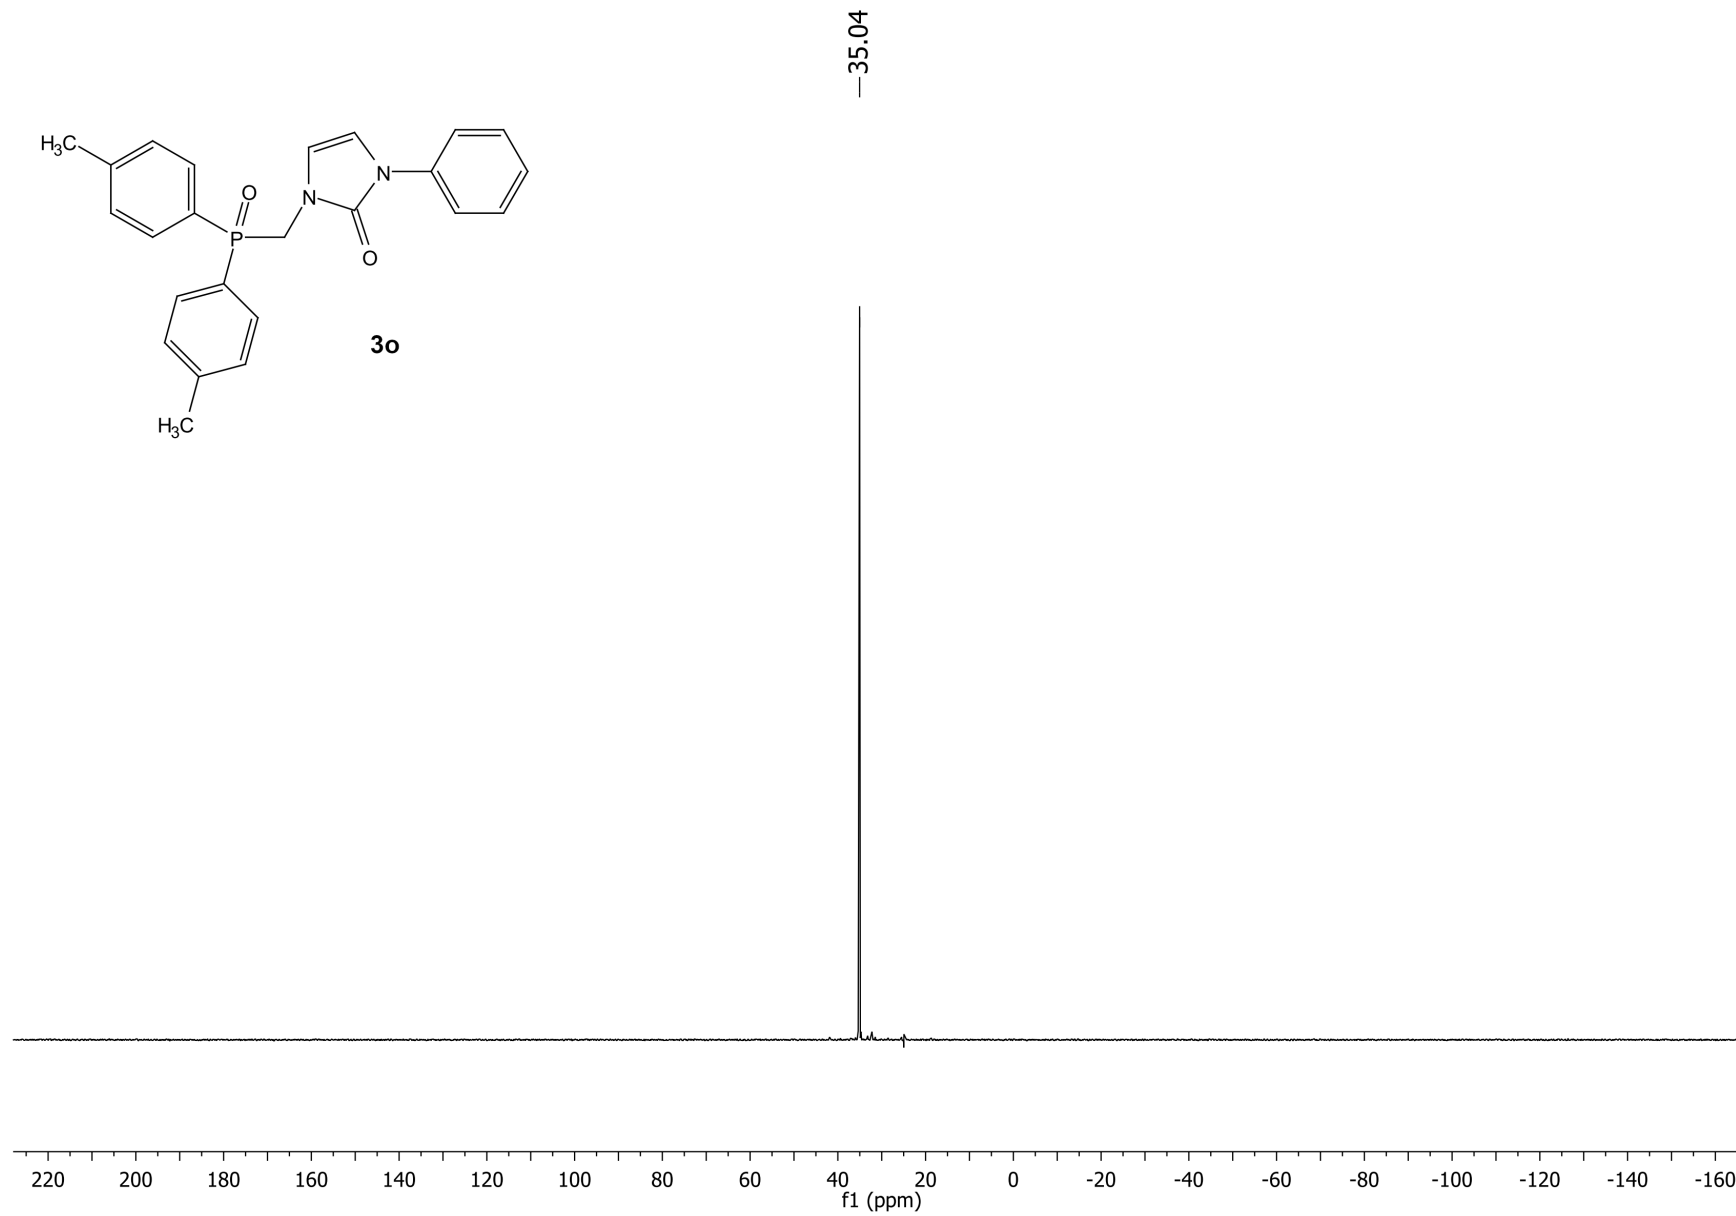

**Figure S78.**  $^{31}\text{P}$  NMR spectrum ( $\text{CDCl}_3$ , 161MHz) of the compound **3o**

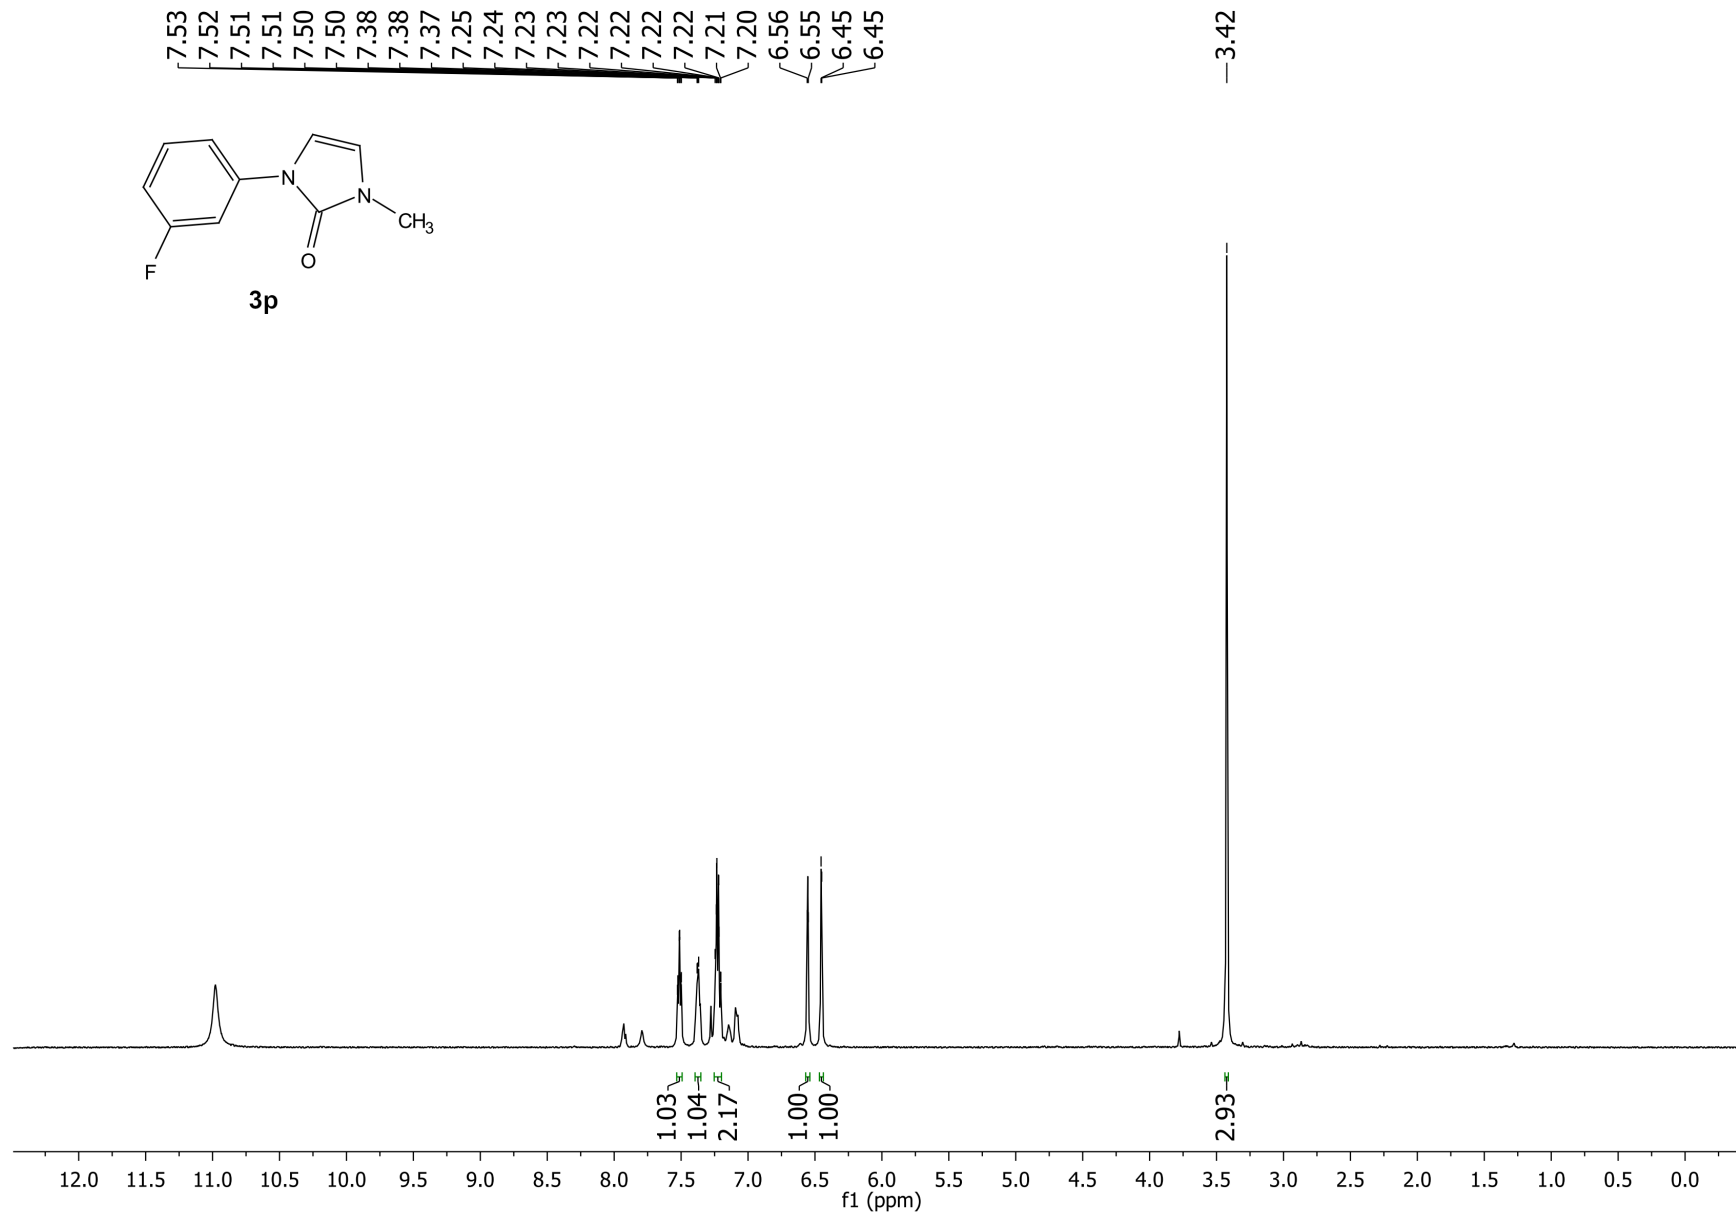

Figure S79. <sup>1</sup>H NMR spectrum (CDCl<sub>3</sub>, 600MHz) of the compound **3p**

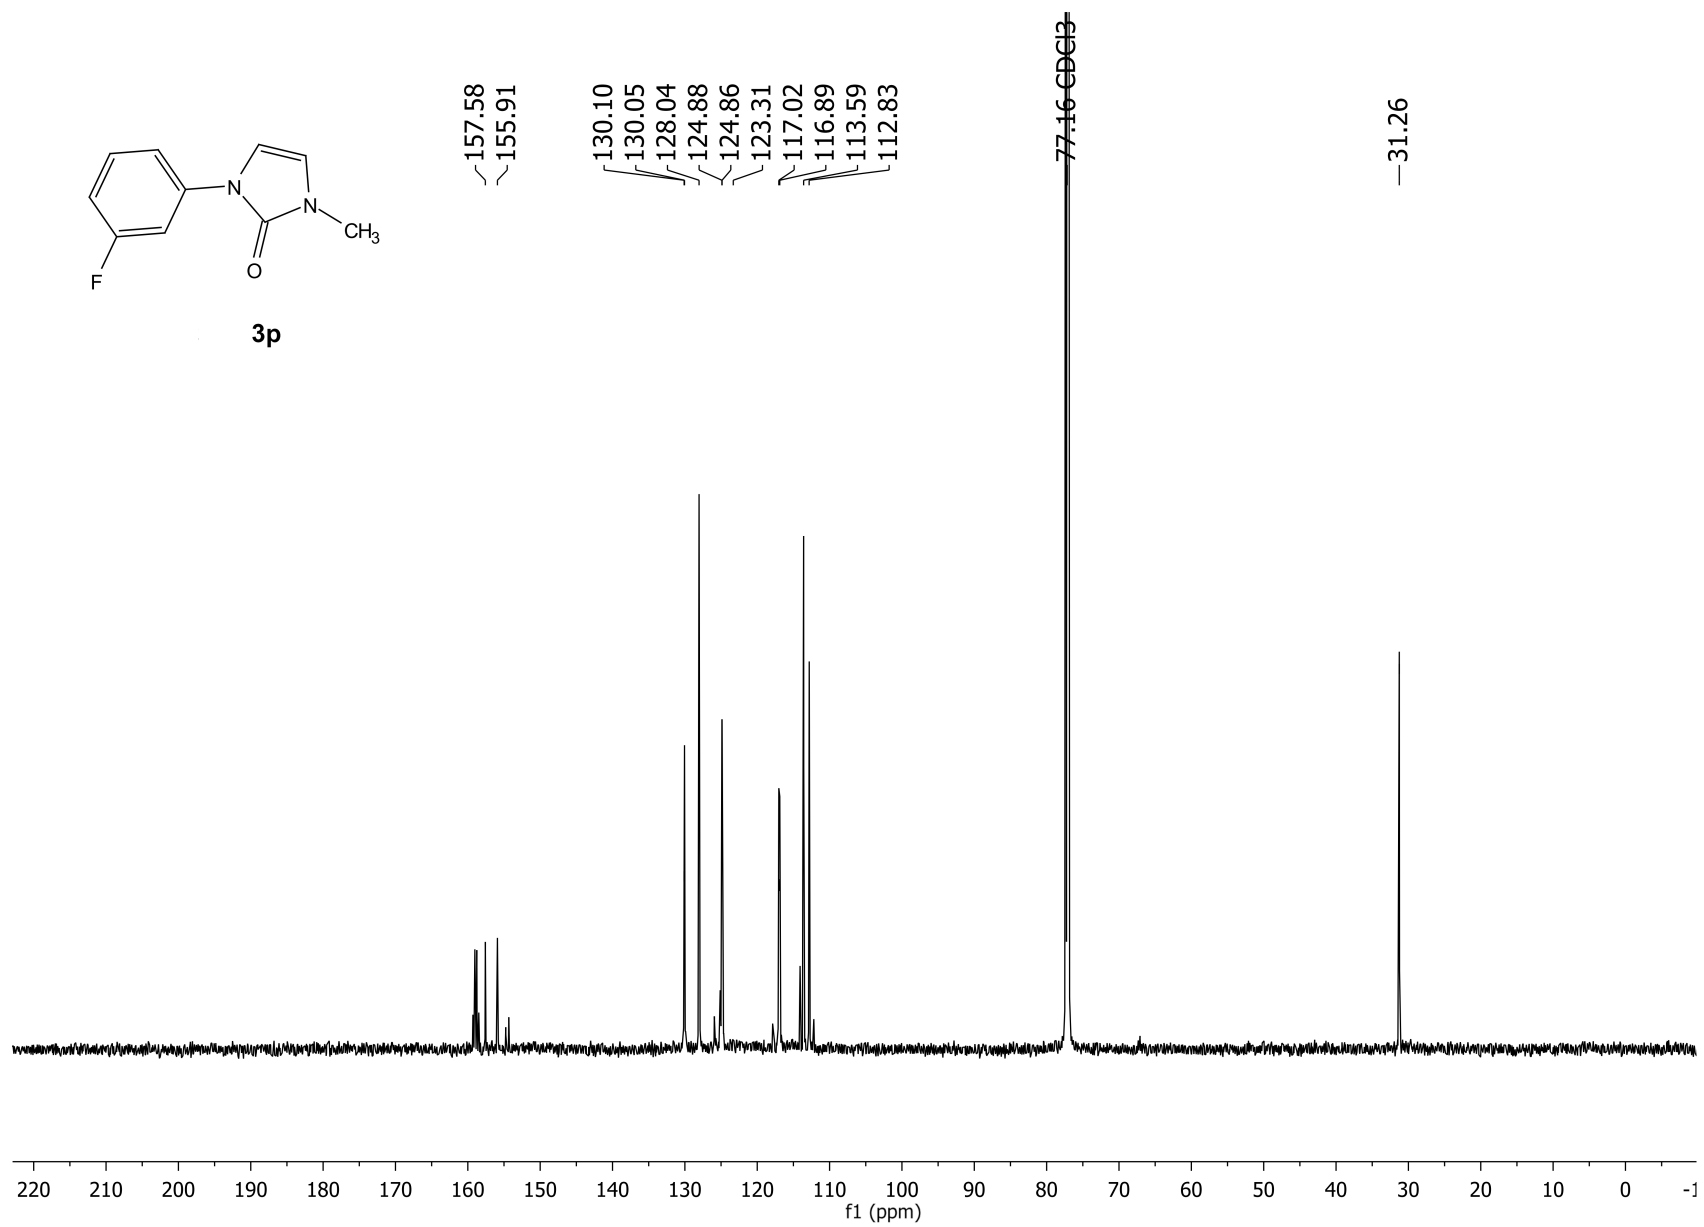

Figure S80. <sup>13</sup>C NMR spectrum (CDCl<sub>3</sub>, 151MHz) of the compound **3p**

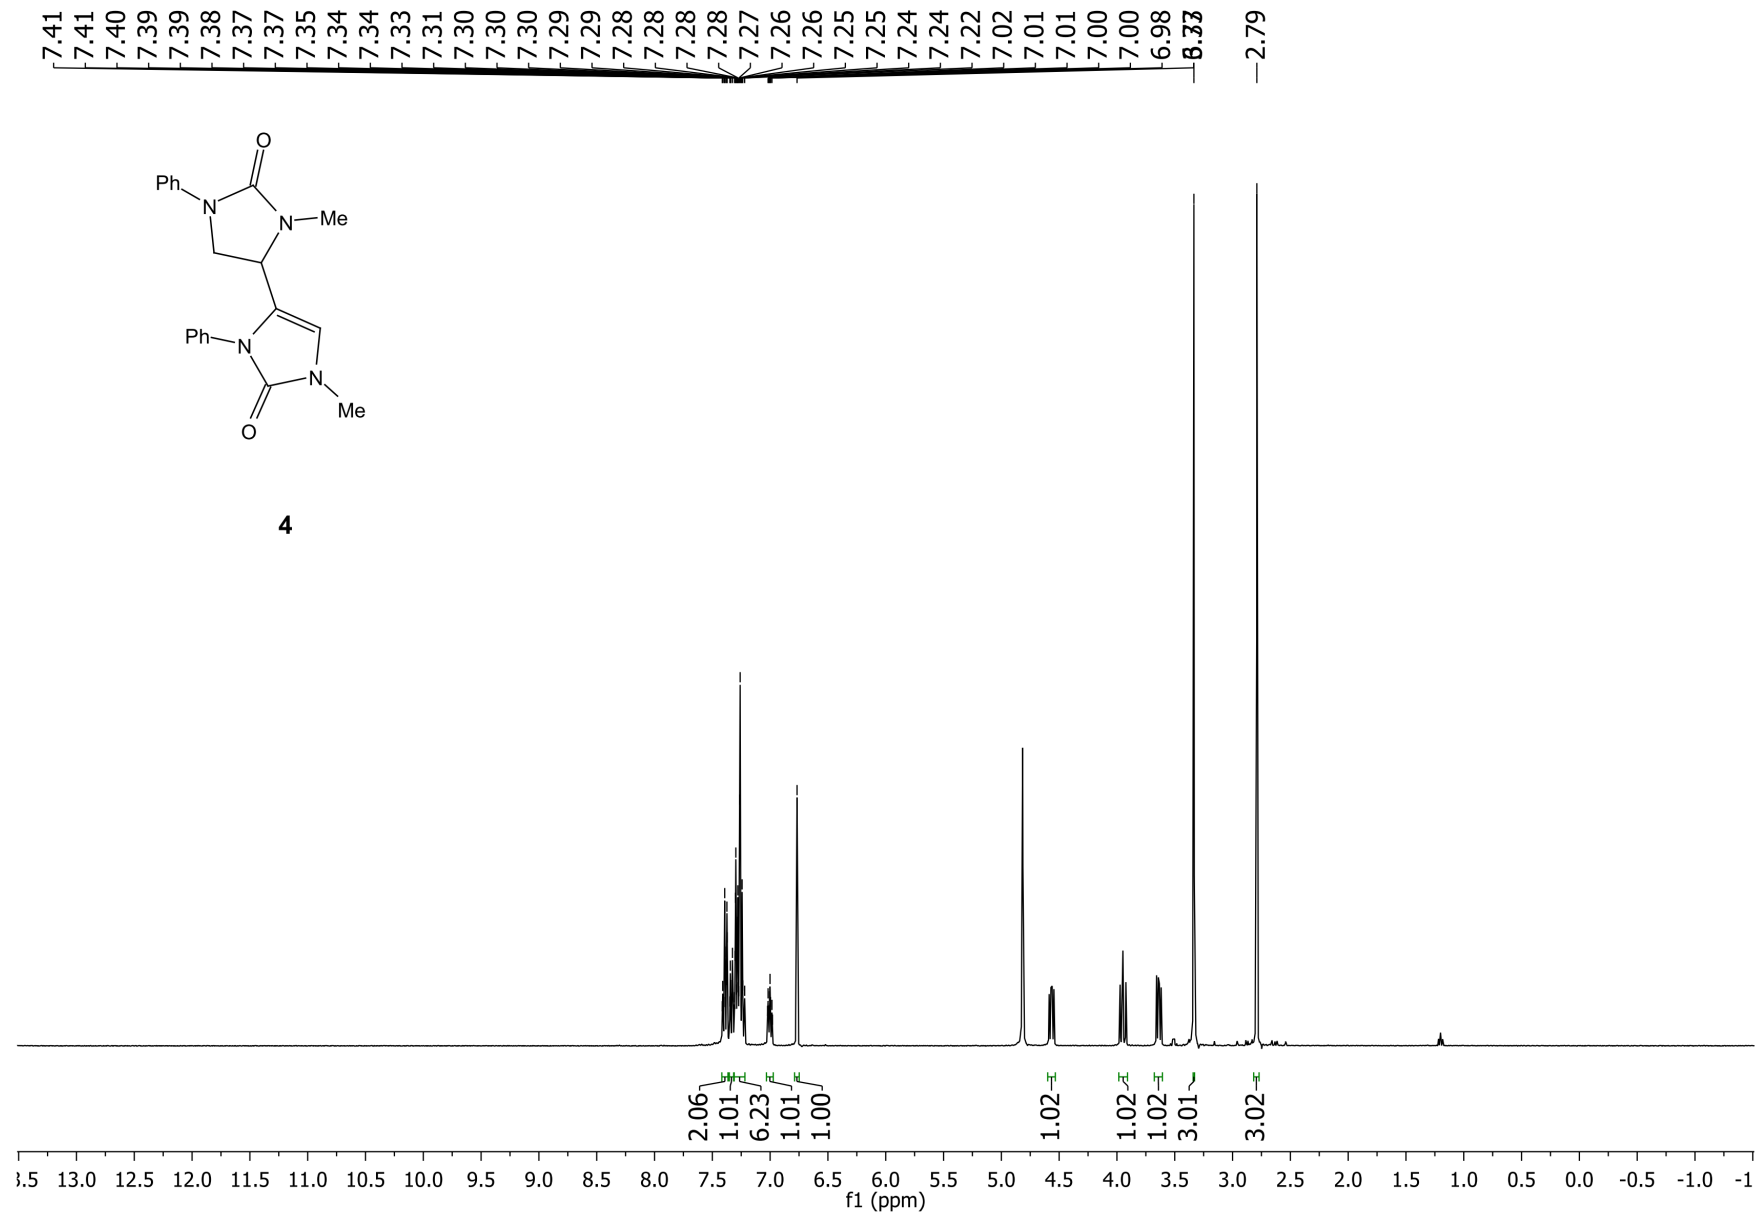

Figure S81. <sup>1</sup>H NMR spectrum (CDCl<sub>3</sub>, 400MHz) of the compound 4

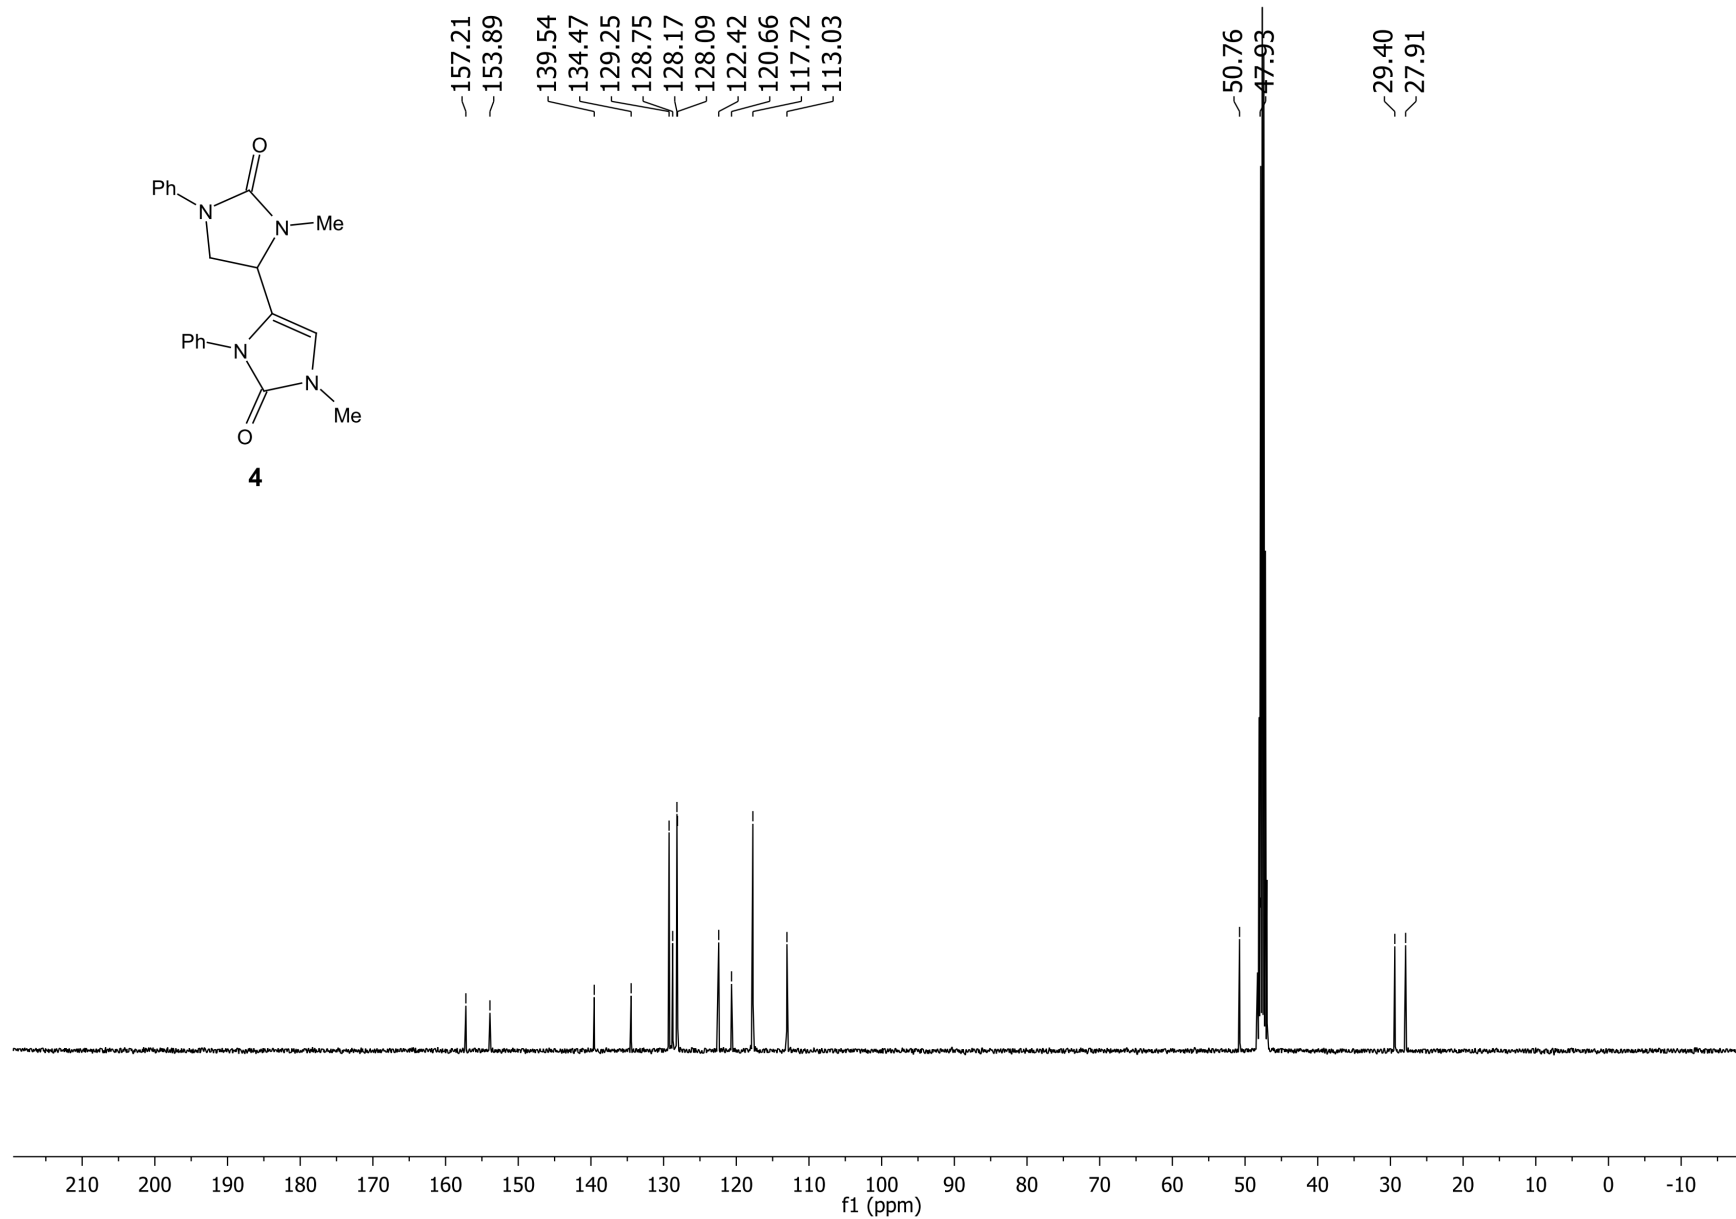

Figure S82.  $^{13}\text{C}$  NMR spectrum (CD<sub>3</sub>OD, 151MHz) of the compound 4

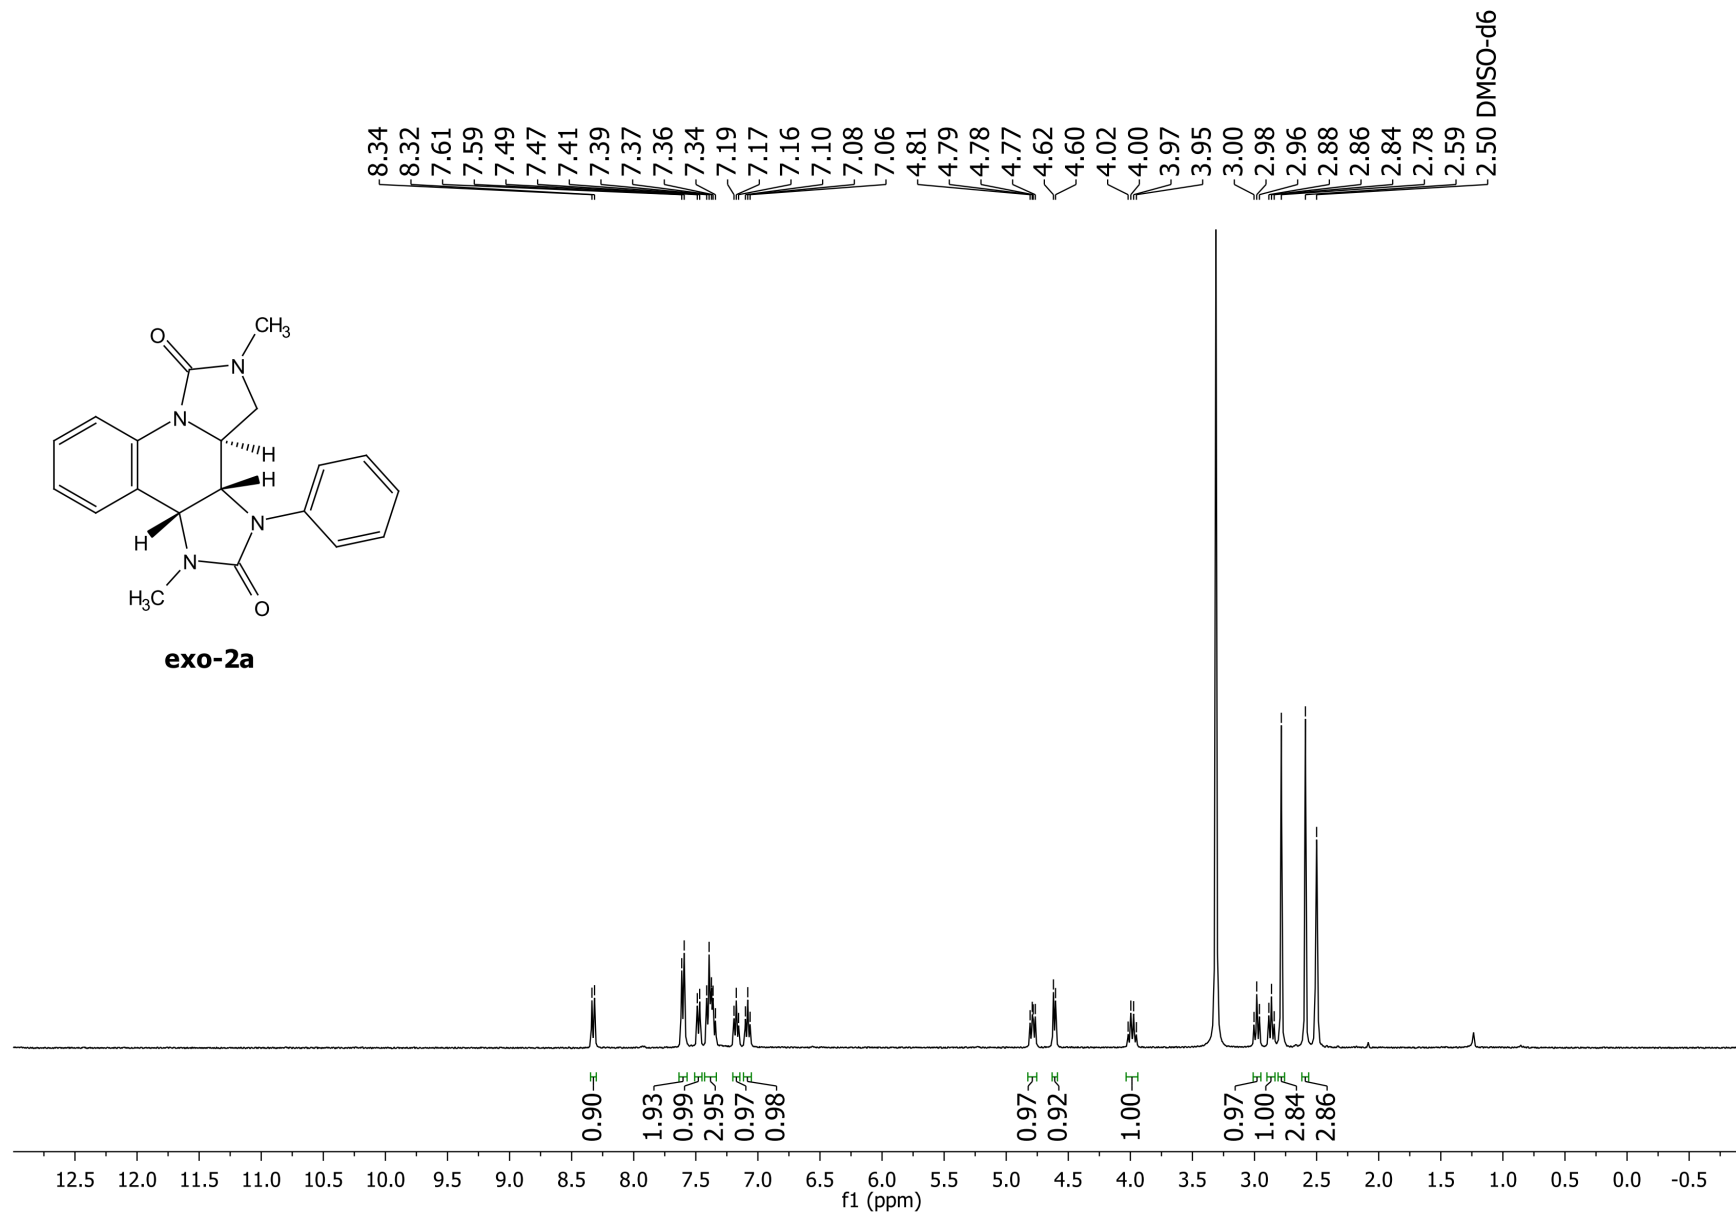

Figure S83. <sup>1</sup>H NMR spectrum ((CD<sub>3</sub>)<sub>2</sub>SO, 500MHz) of the compound **exo-2a**

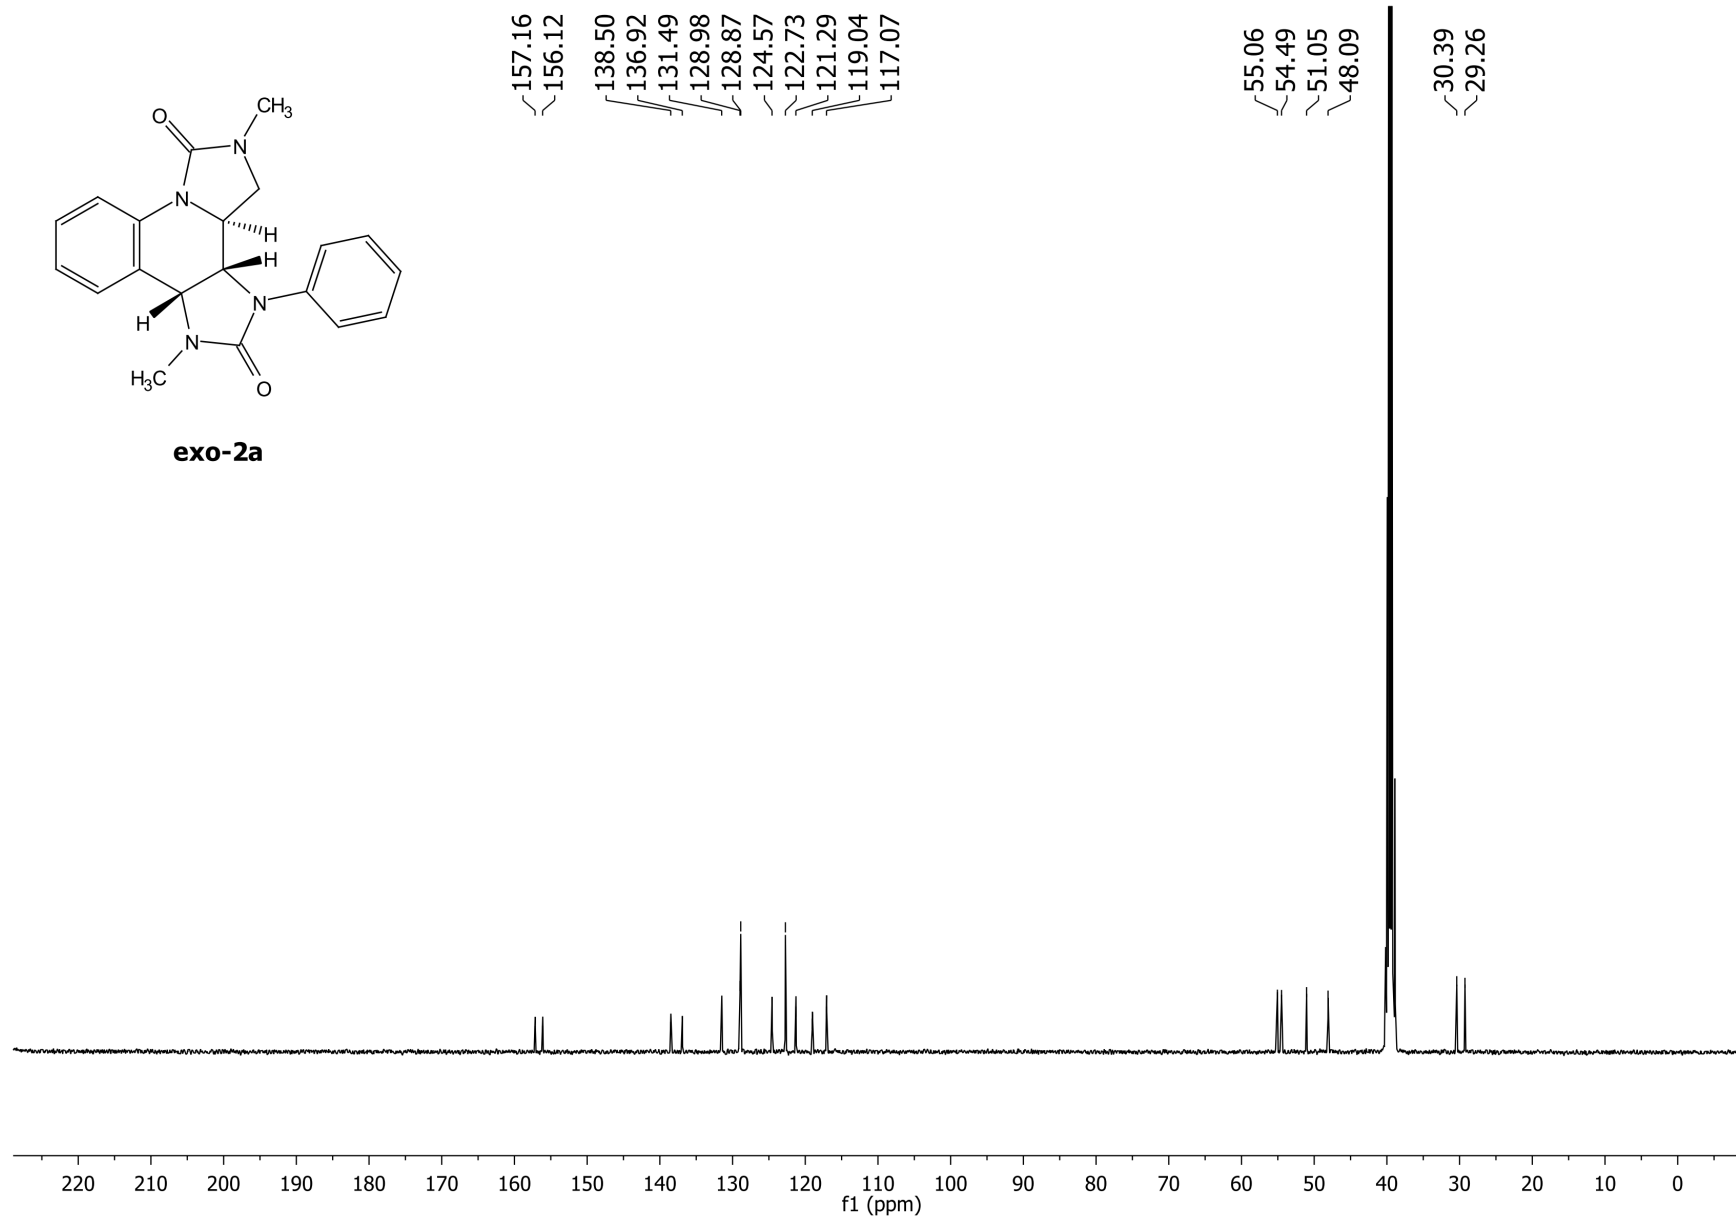

Figure S84. <sup>13</sup>C NMR spectrum ((CD<sub>3</sub>)<sub>2</sub>SO, 126MHz) of the compound *exo-2a*



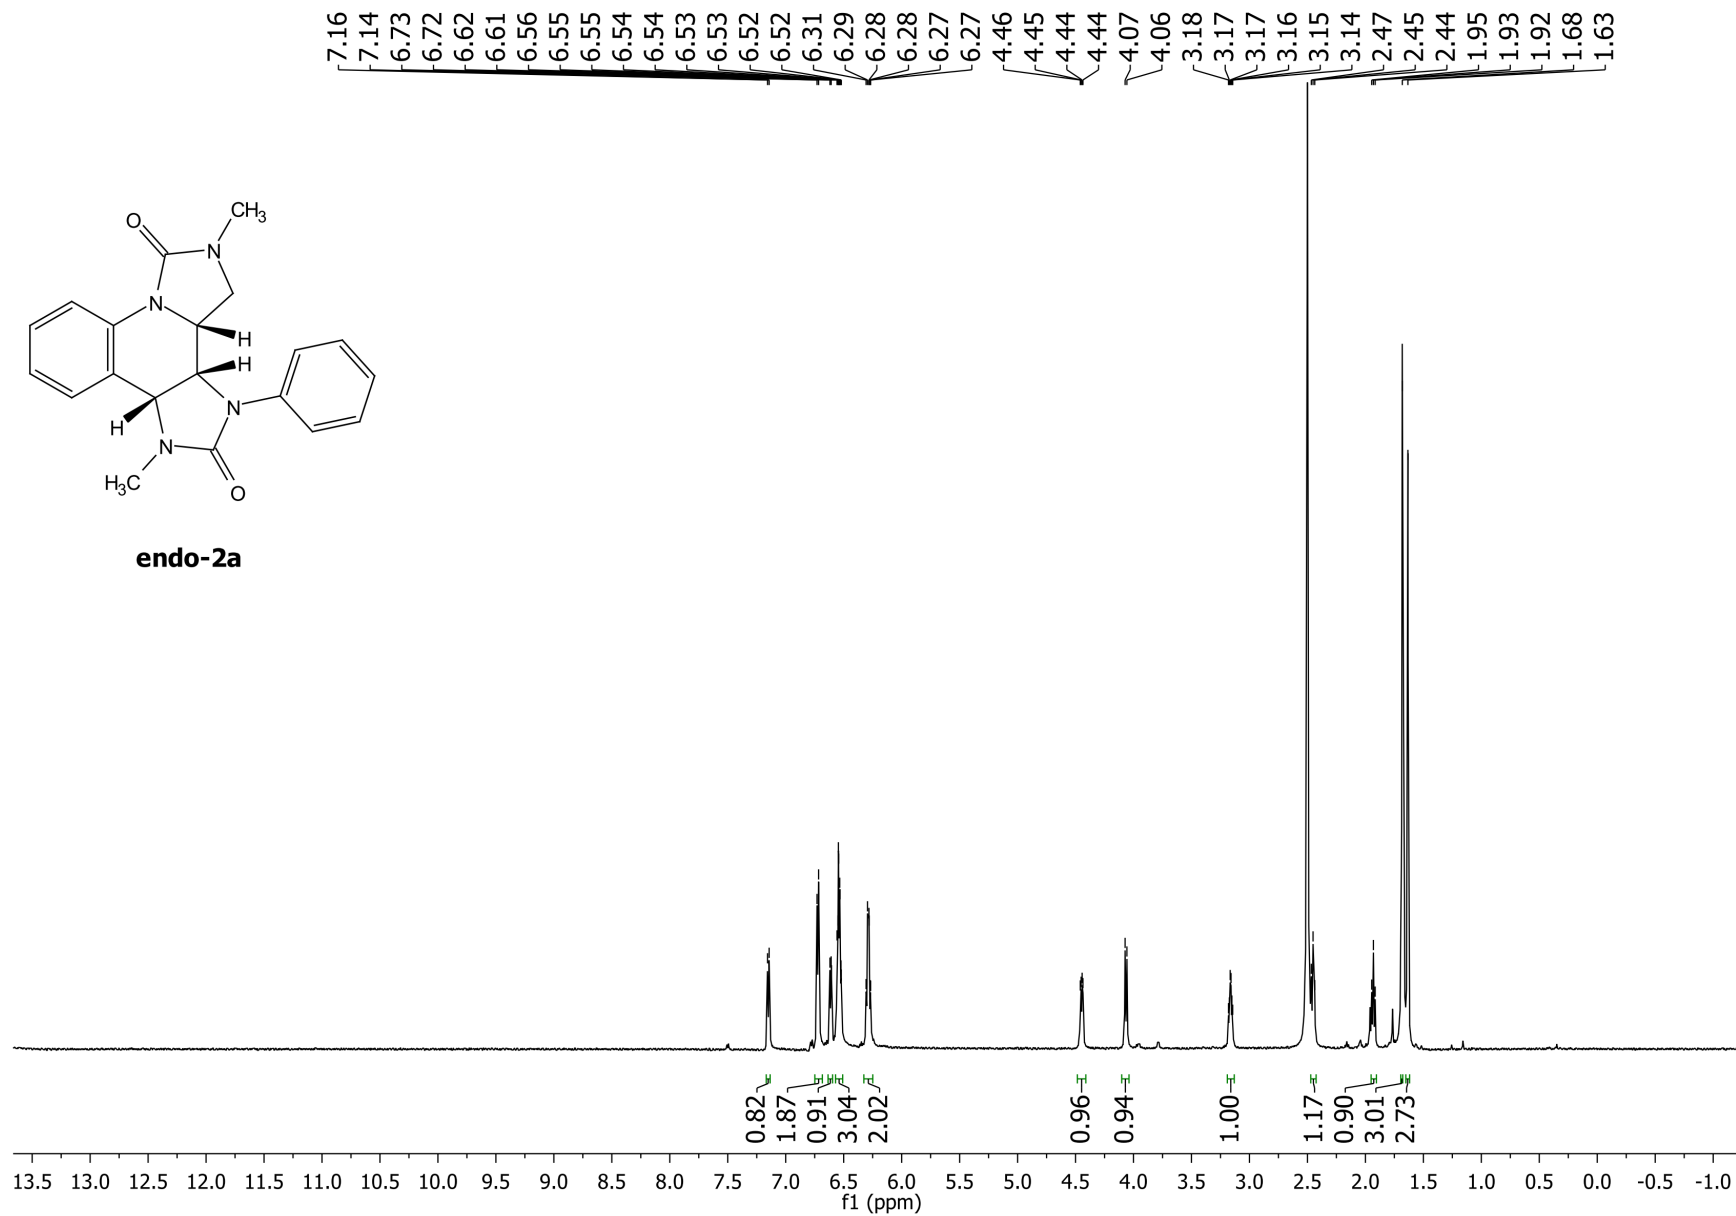

**Figure S85.** <sup>1</sup>H NMR spectrum ((CD<sub>3</sub>)<sub>2</sub>SO, 500MHz) of the compound **endo-2a**

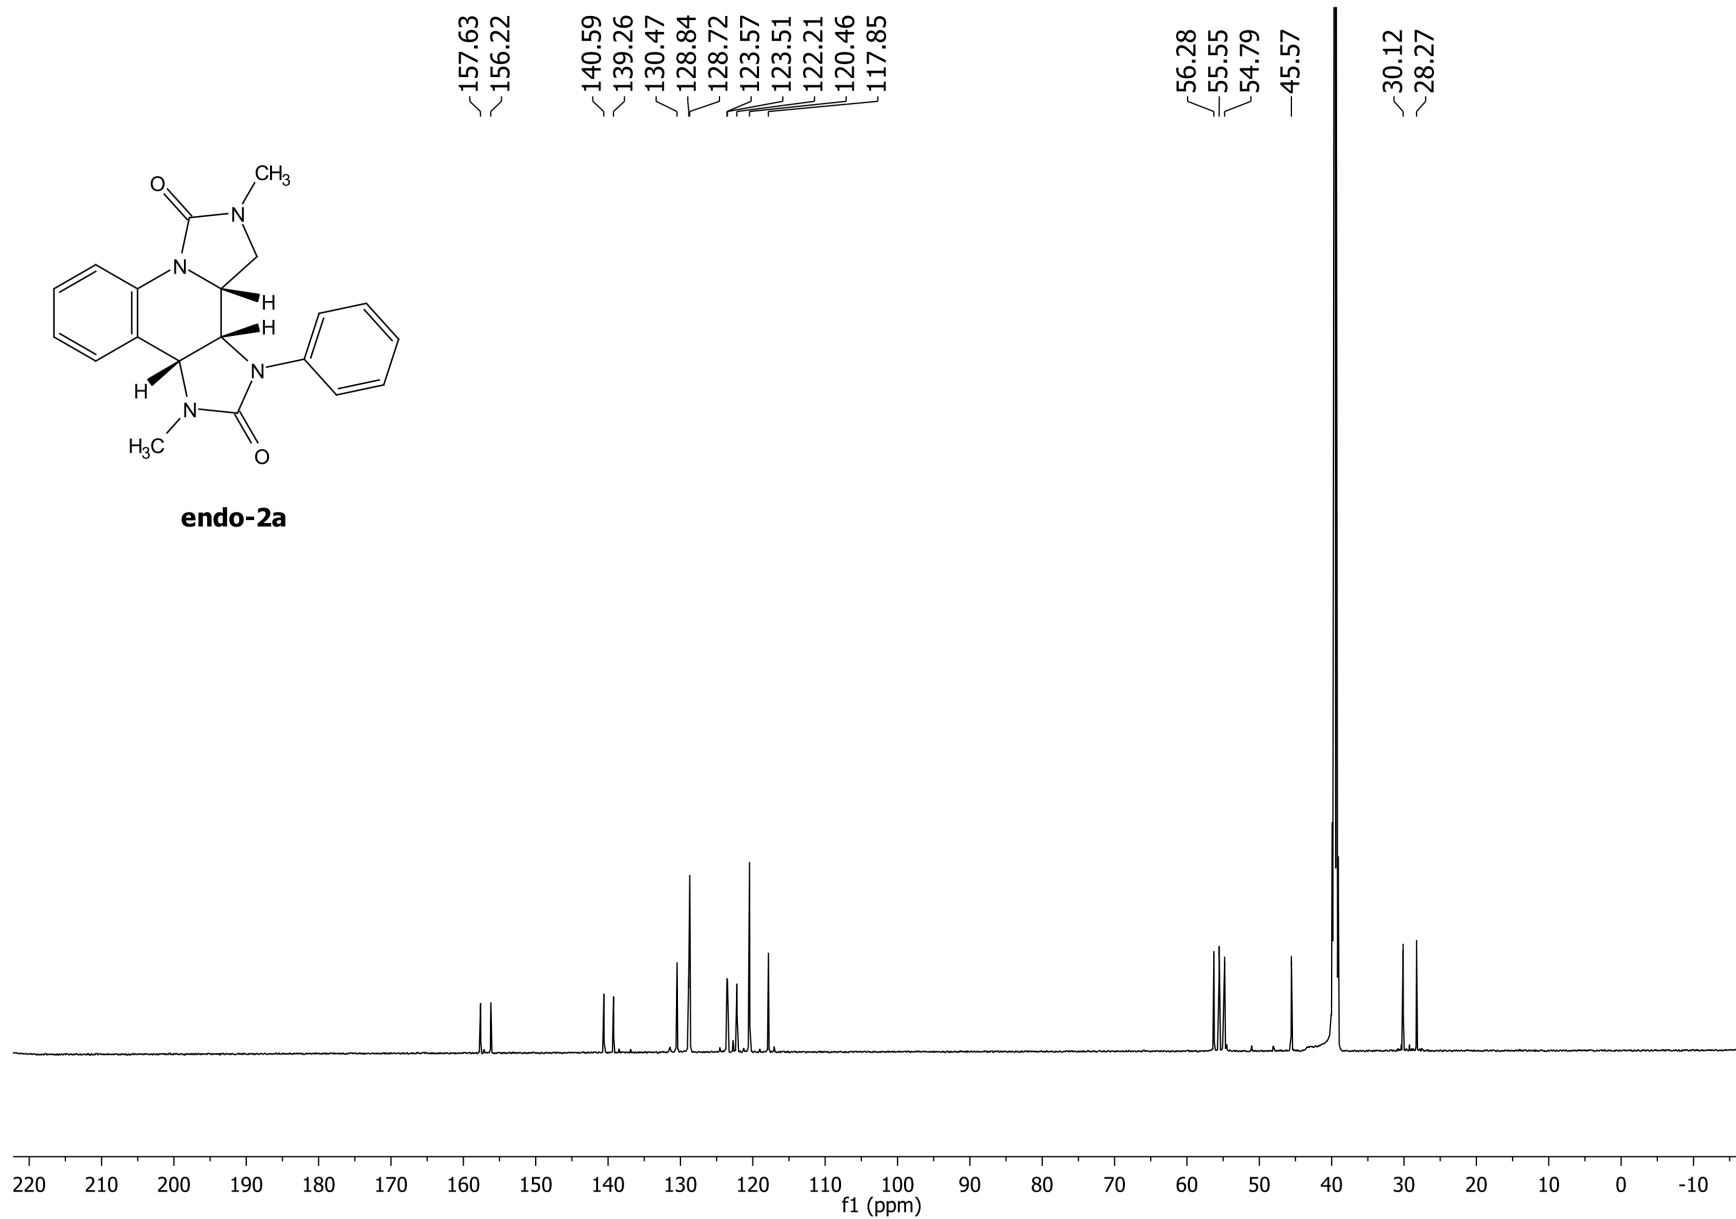

Figure S86. <sup>13</sup>C NMR spectrum ((CD<sub>3</sub>)<sub>2</sub>SO, 126MHz) of the compound **endo-2a**

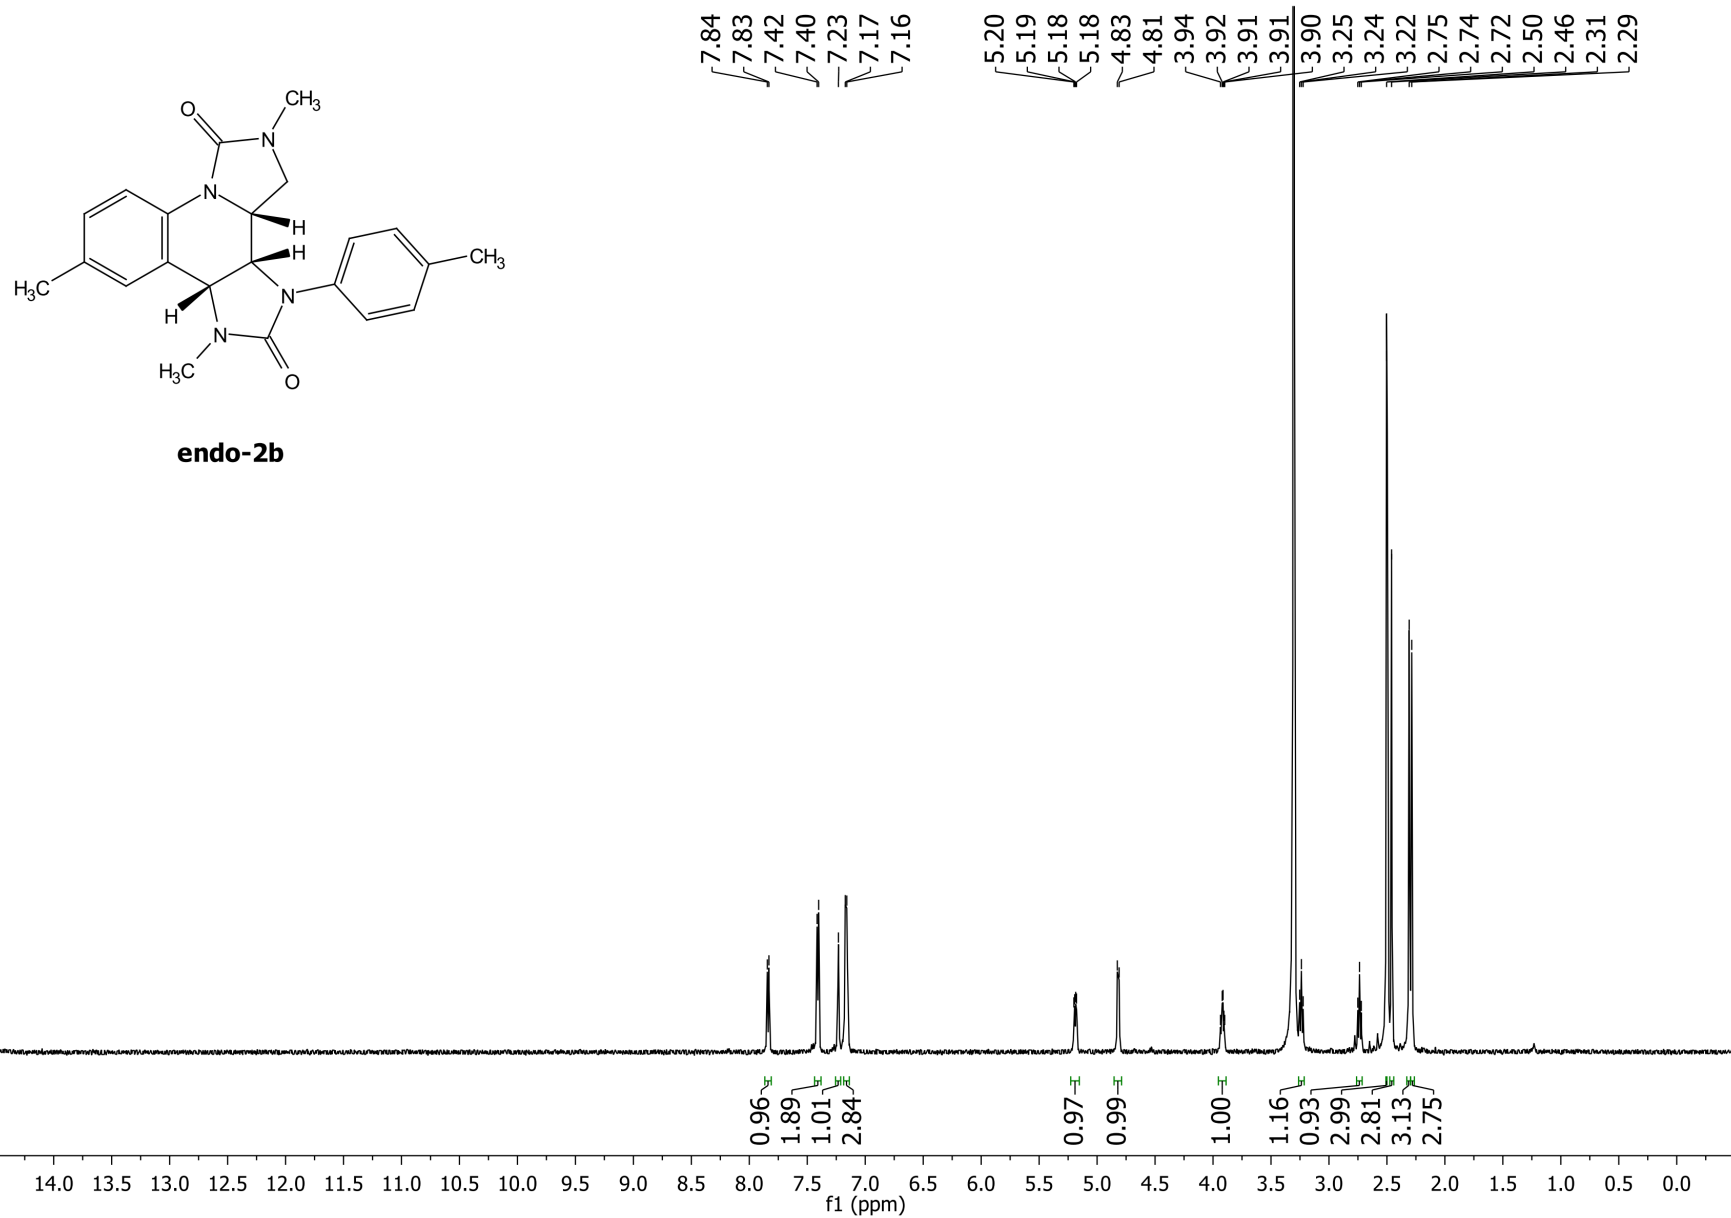

Figure S87. <sup>1</sup>H NMR spectrum ((CD<sub>3</sub>)<sub>2</sub>SO, 400MHz) of the compound **endo-2b**

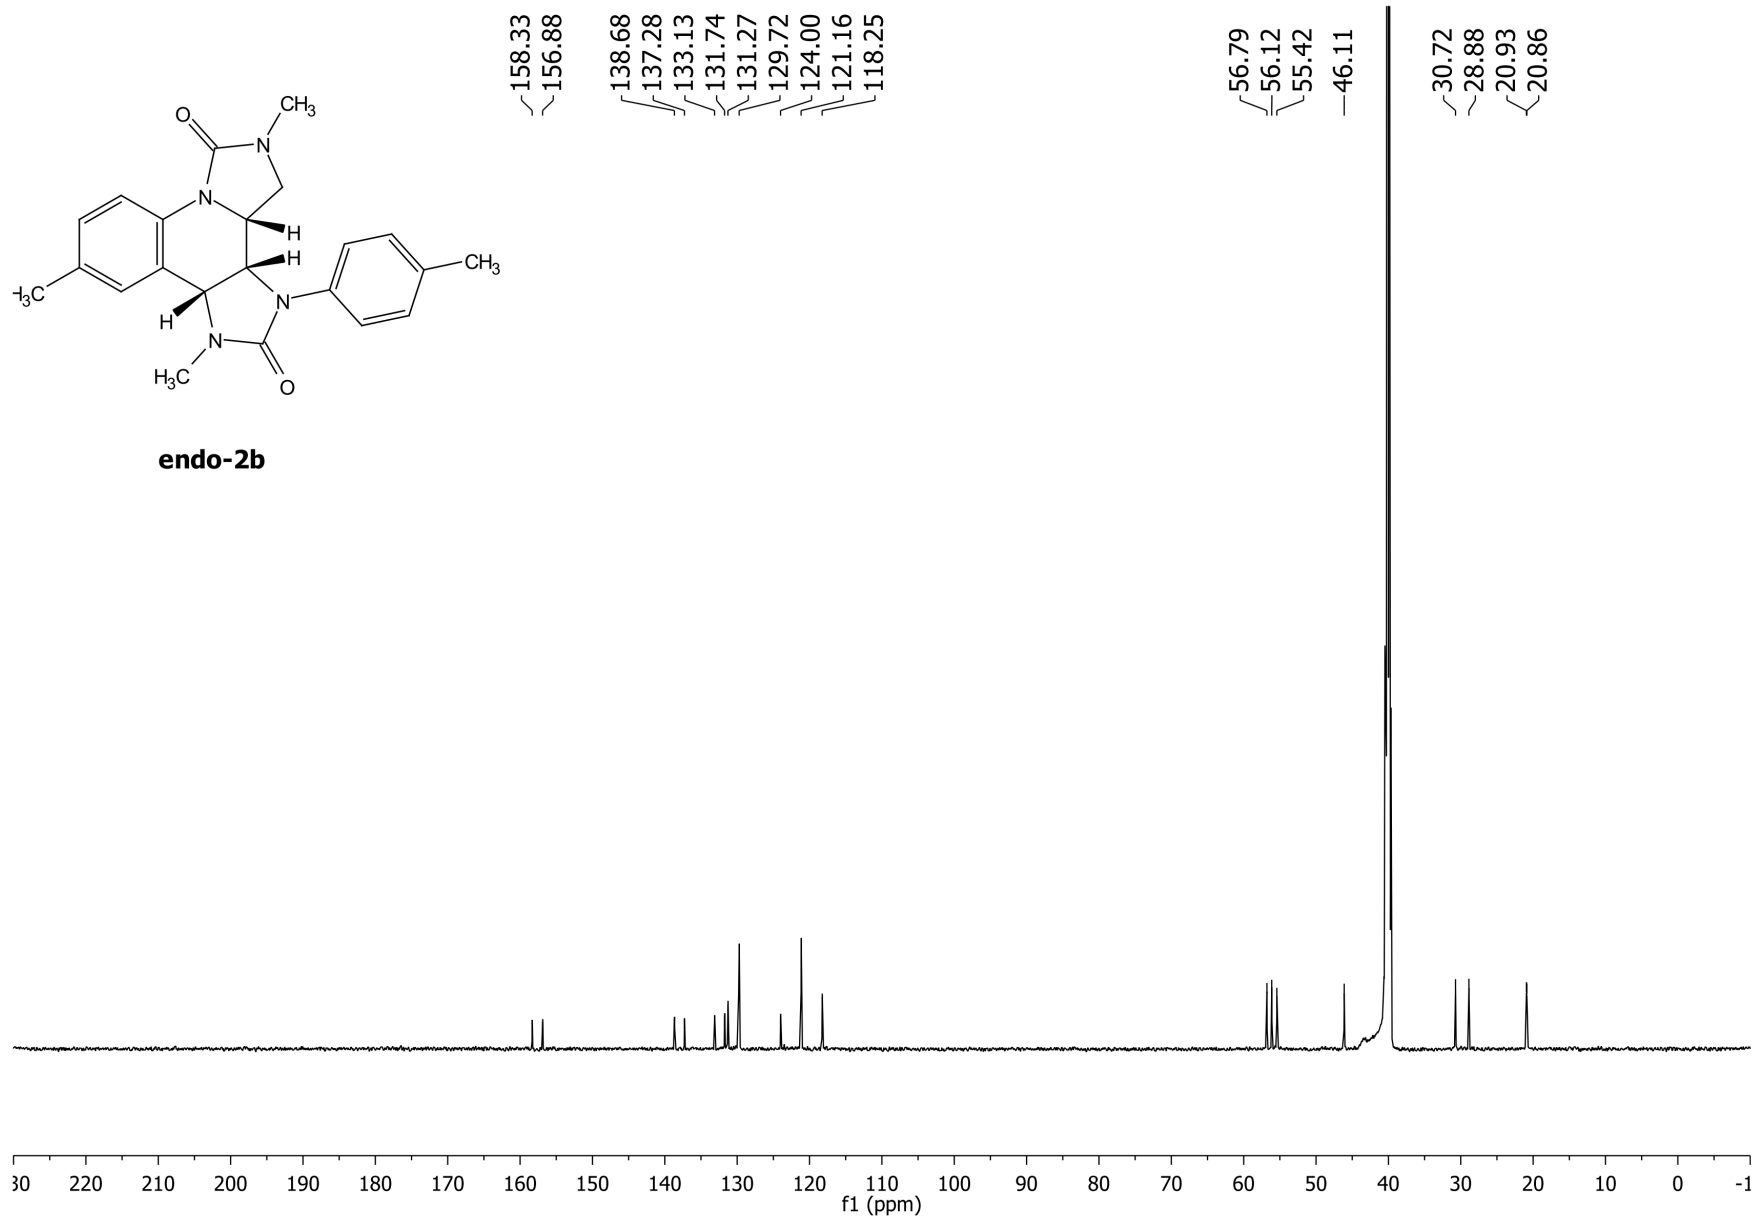

Figure S88.  $^{13}\text{C}$  NMR spectrum ( $(\text{CD}_3)_2\text{SO}$ , 151MHz) of the compound **endo-2b**

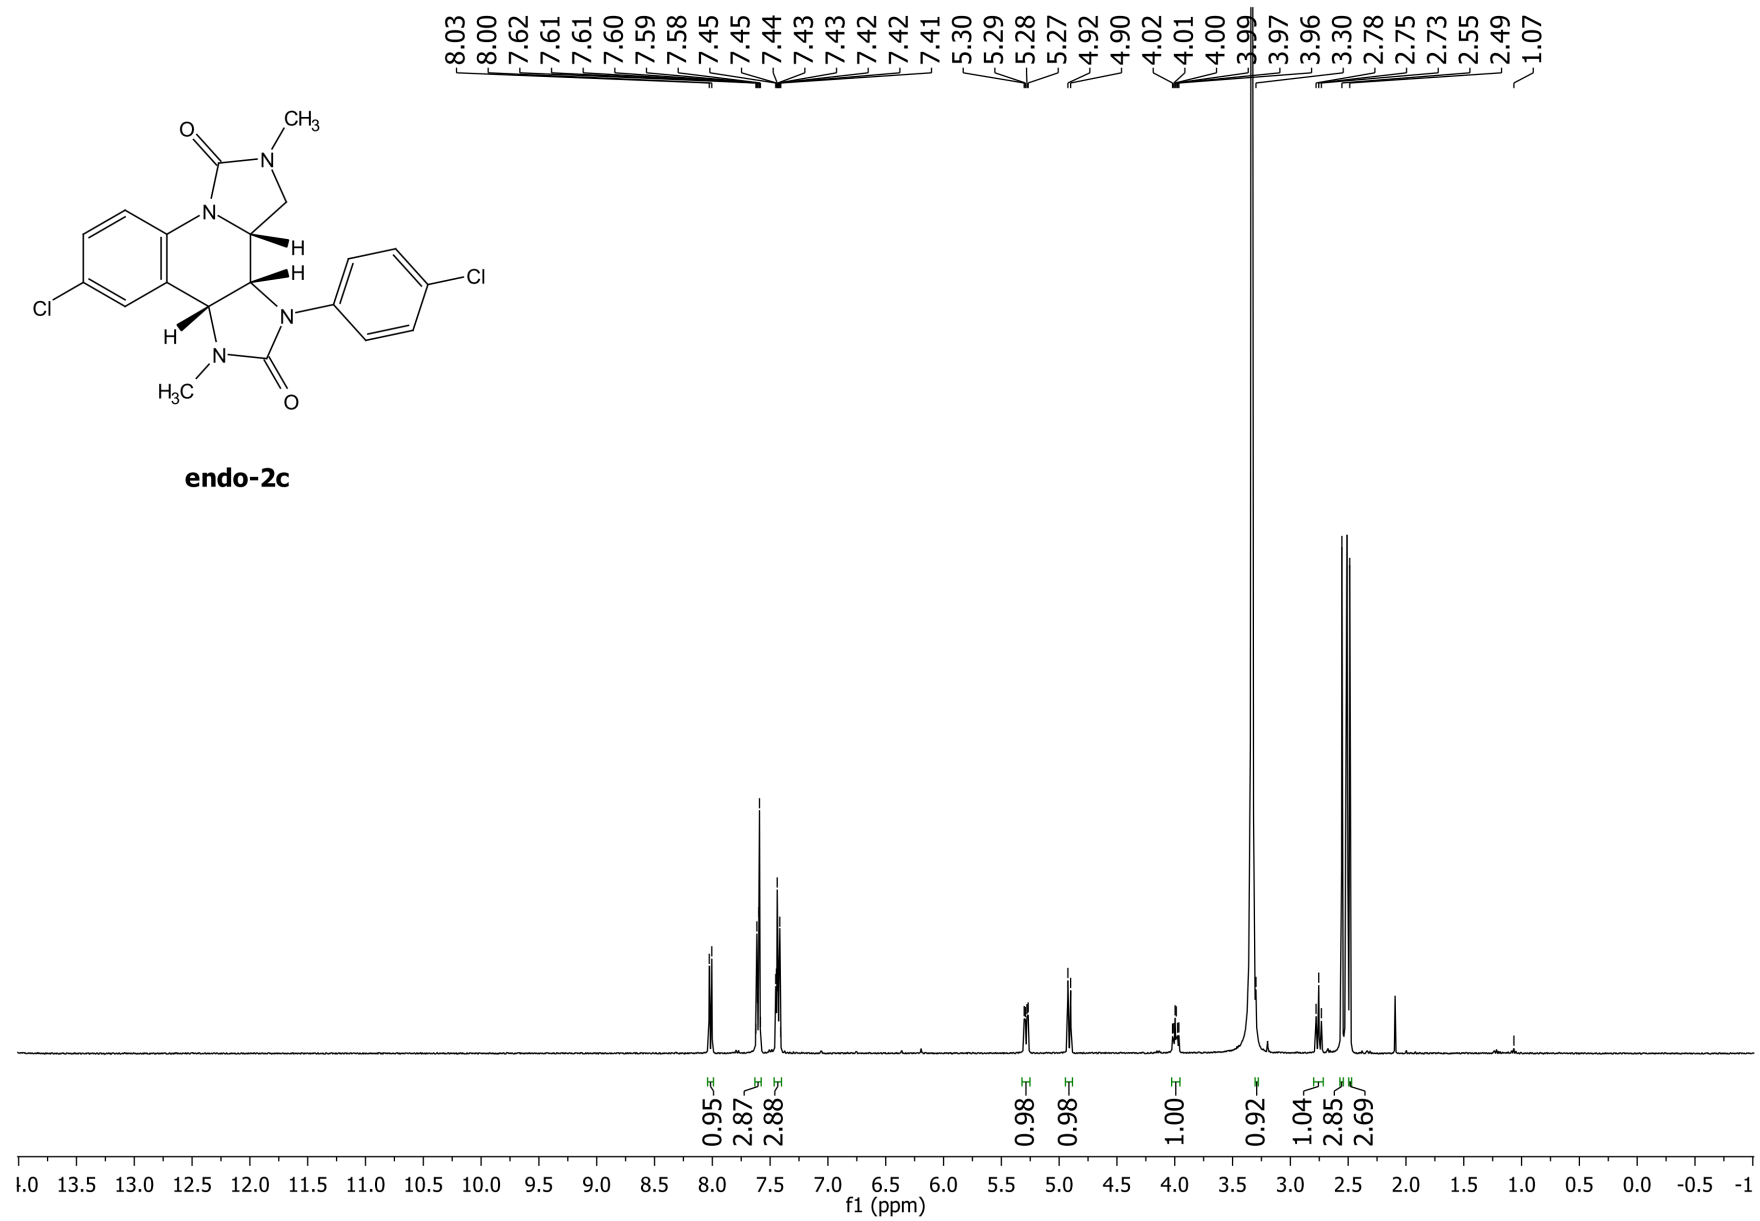

Figure S89.  $^1\text{H}$  NMR spectrum ( $(\text{CD}_3)_2\text{SO}$ , 400MHz) of the compound **endo-2c**

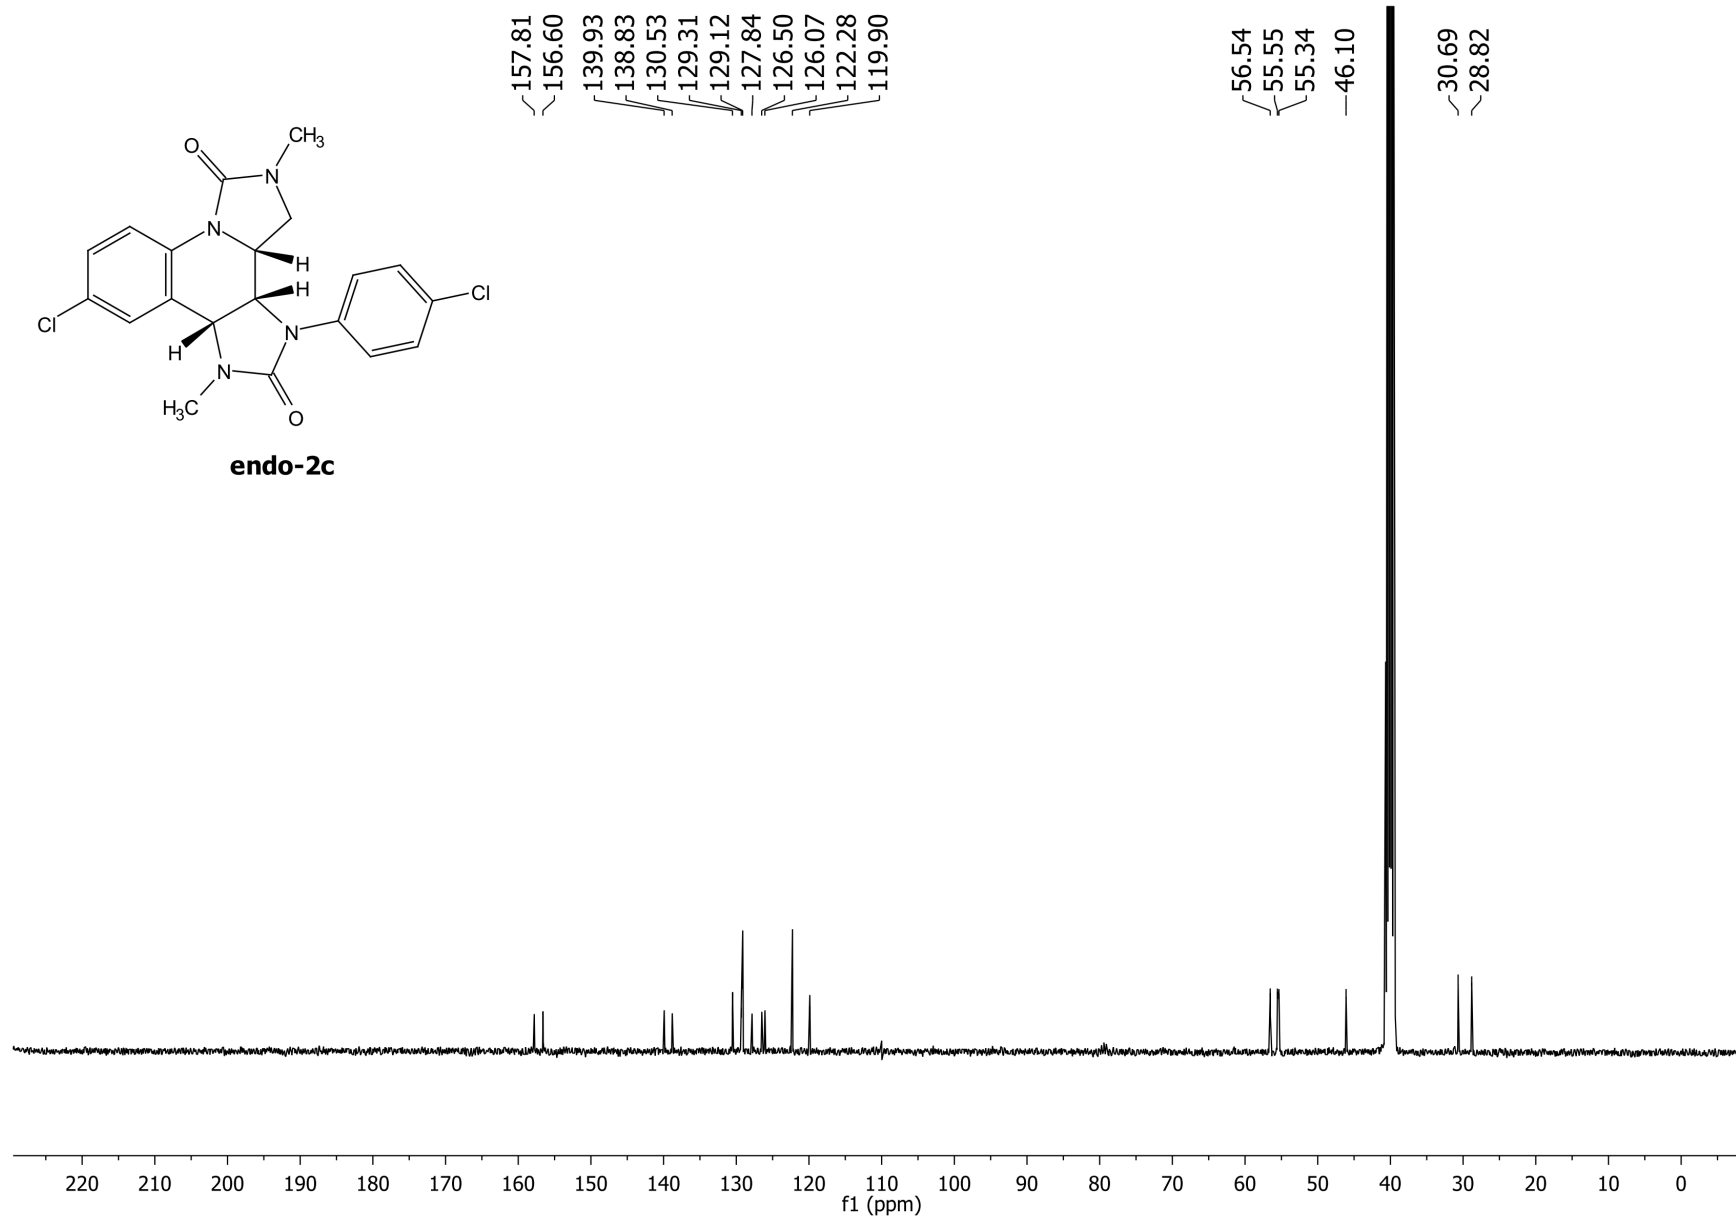

Figure S90. <sup>13</sup>C NMR spectrum ((CD<sub>3</sub>)<sub>2</sub>SO, 151MHz) of the compound **endo-2c**

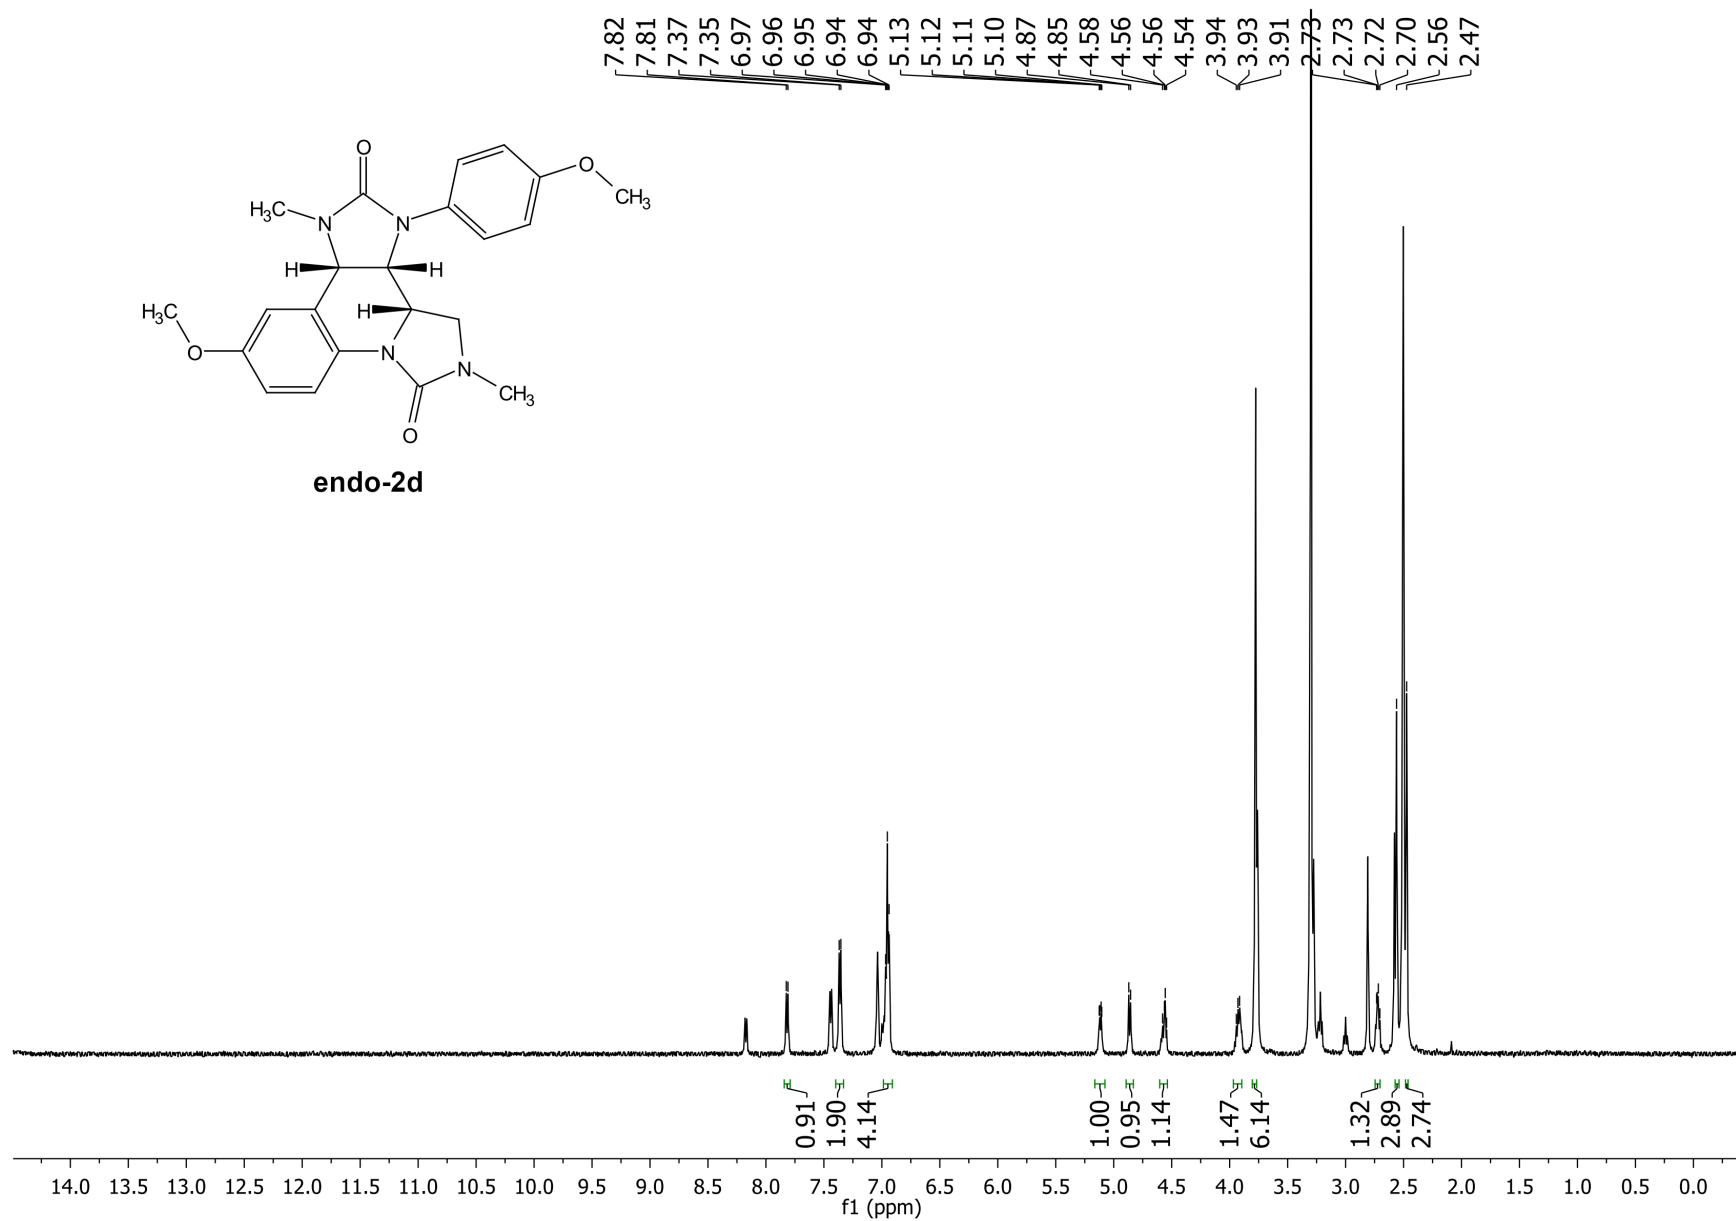

**Figure S91.**  $^1\text{H}$  NMR spectrum ( $(\text{CD}_3)_2\text{SO}$ , 600MHz) of the compound **endo-2d**

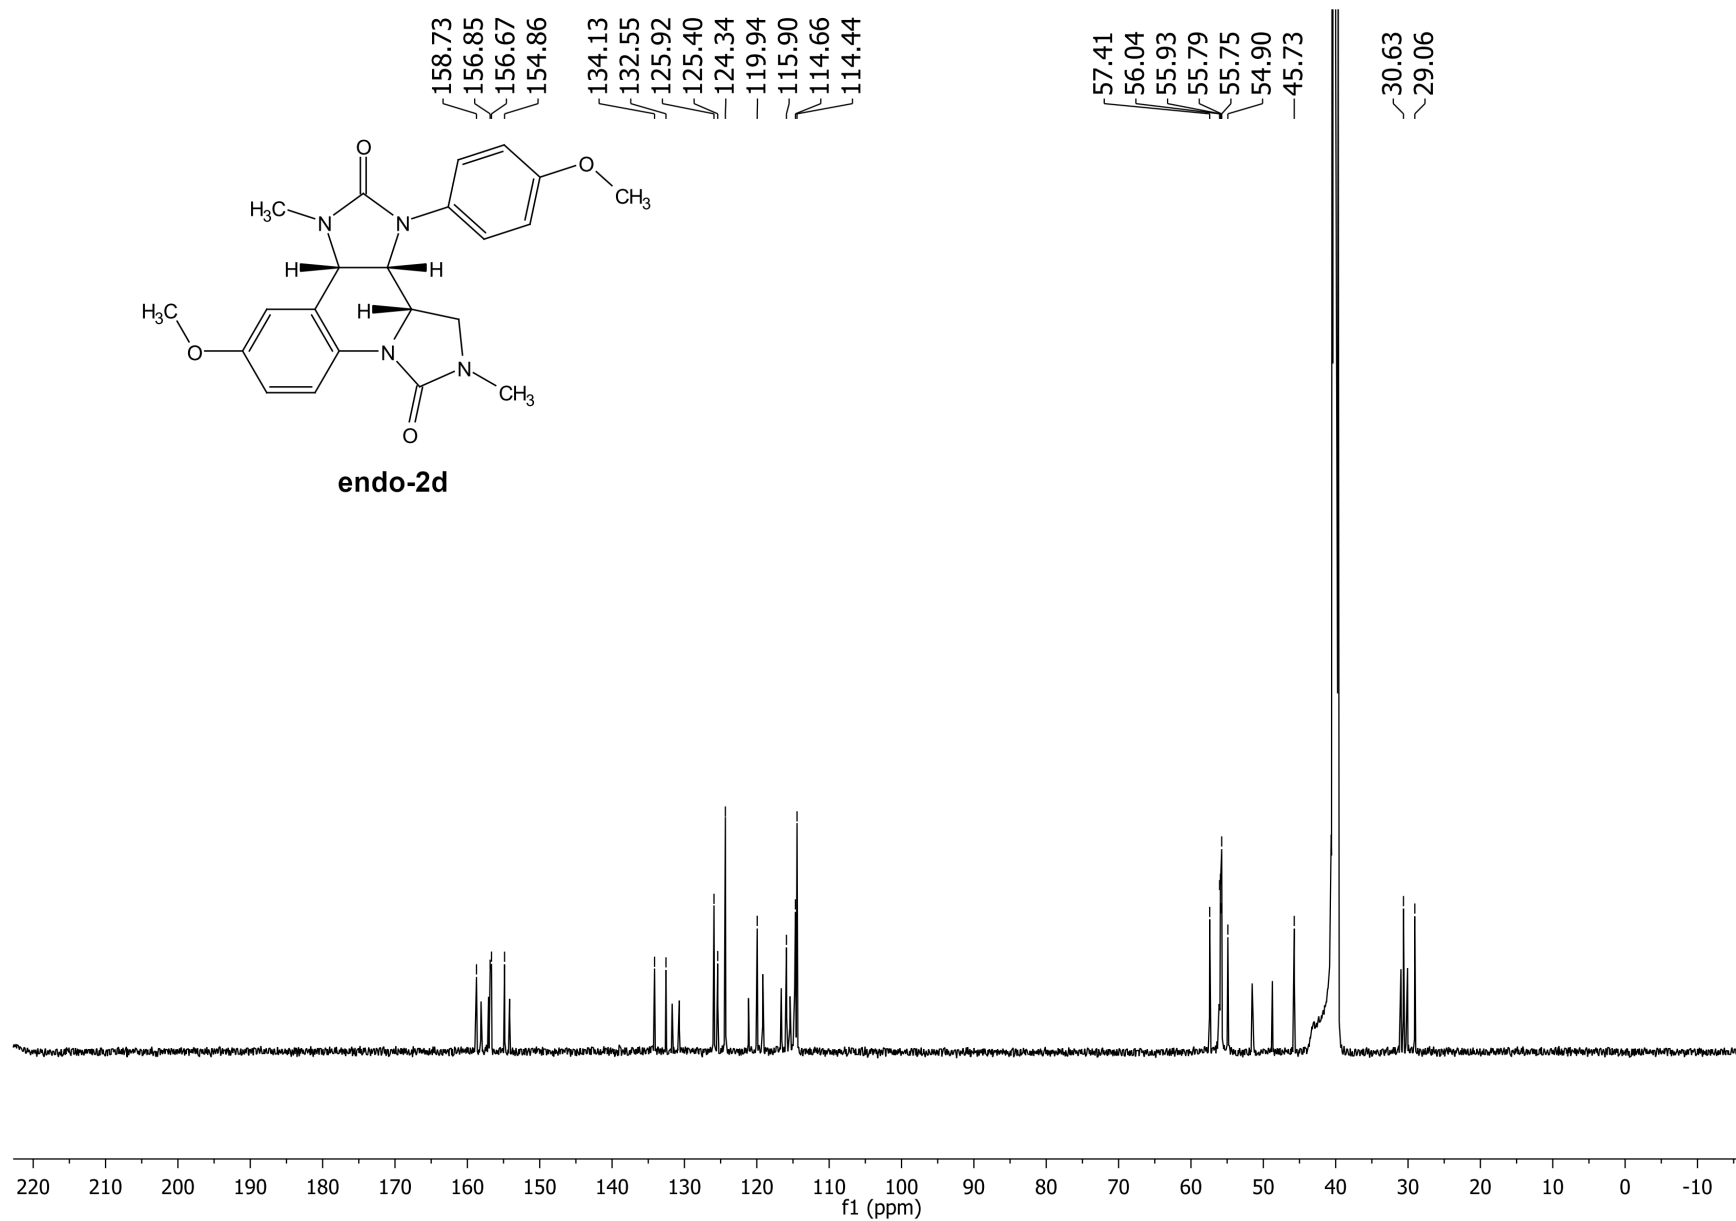

Figure S92. <sup>13</sup>C NMR spectrum ((CD<sub>3</sub>)<sub>2</sub>SO, 151MHz) of the compound **endo-2d**



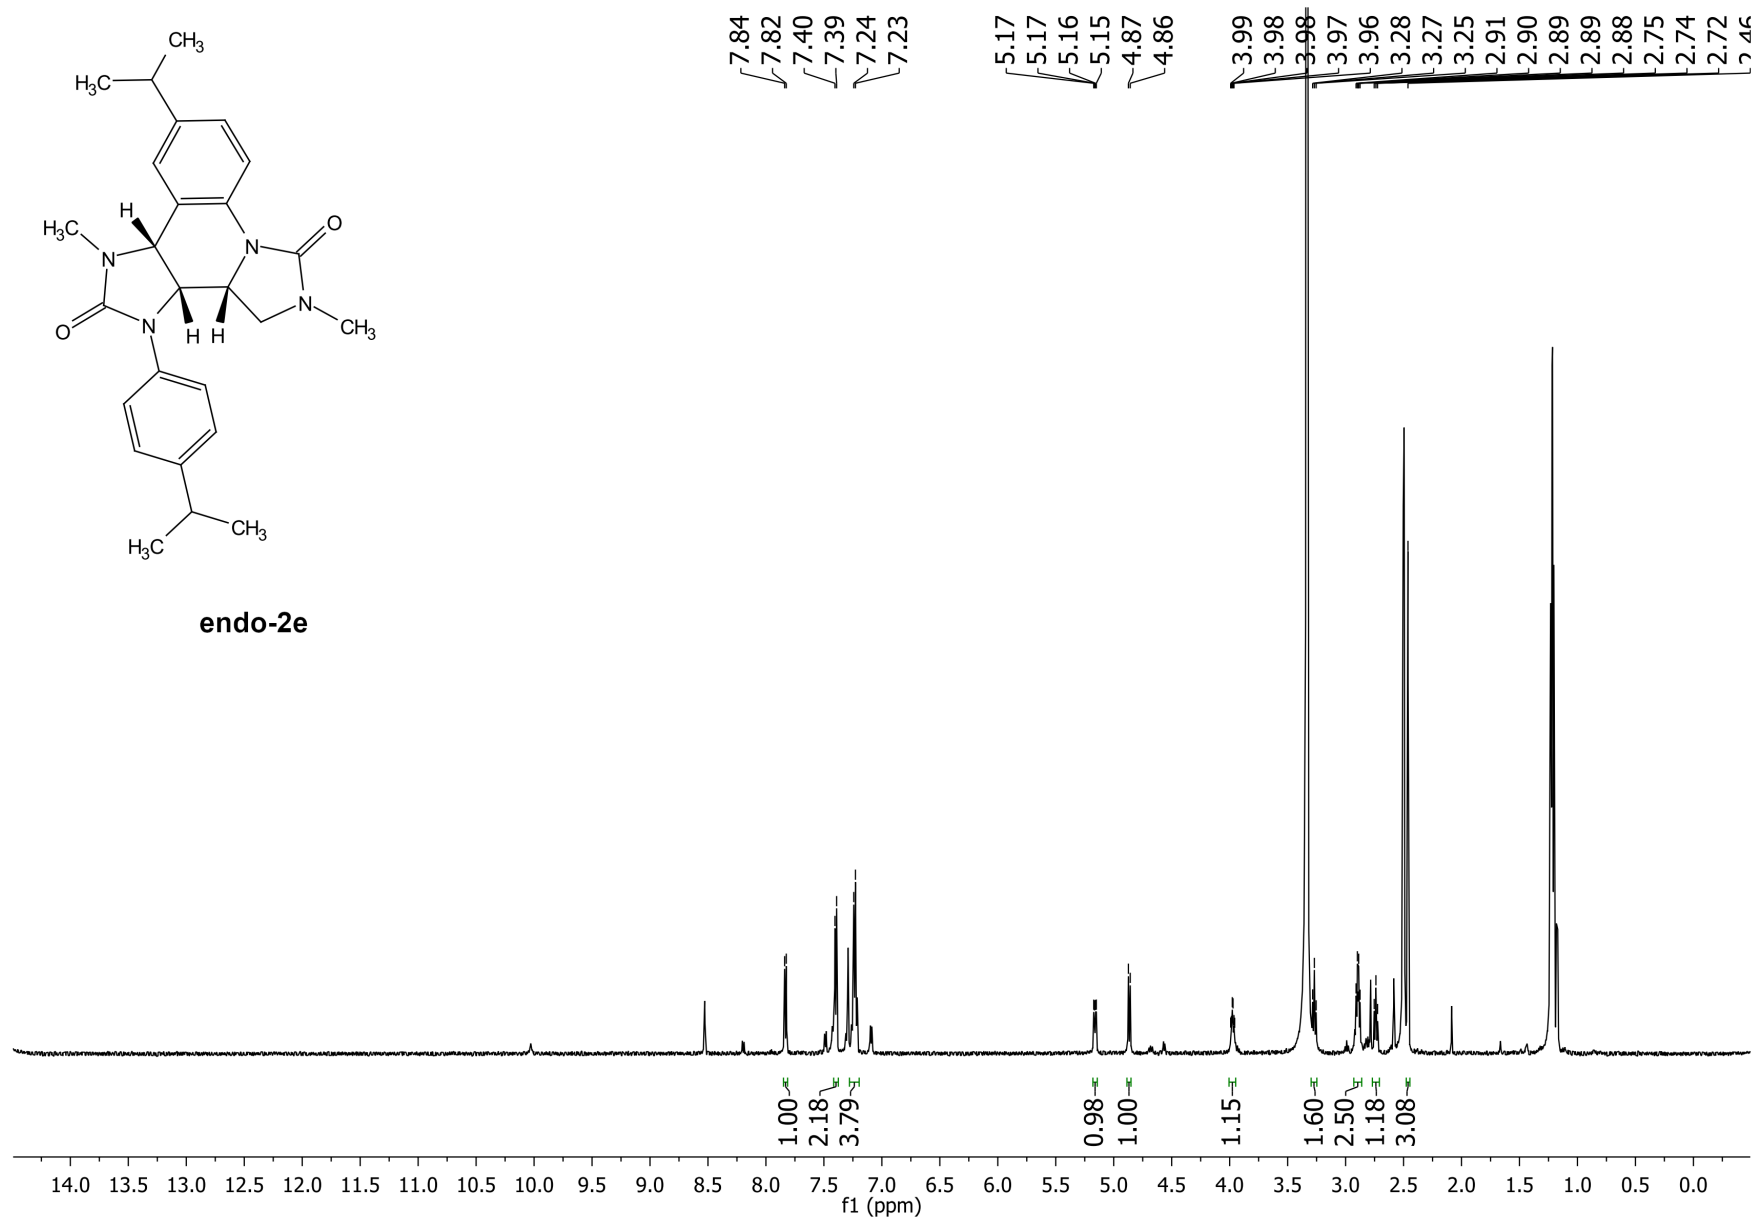

**Figure S93.**  $^1\text{H}$  NMR spectrum ( $(\text{CD}_3)_2\text{SO}$ , 600MHz) of the compound **endo-2e**

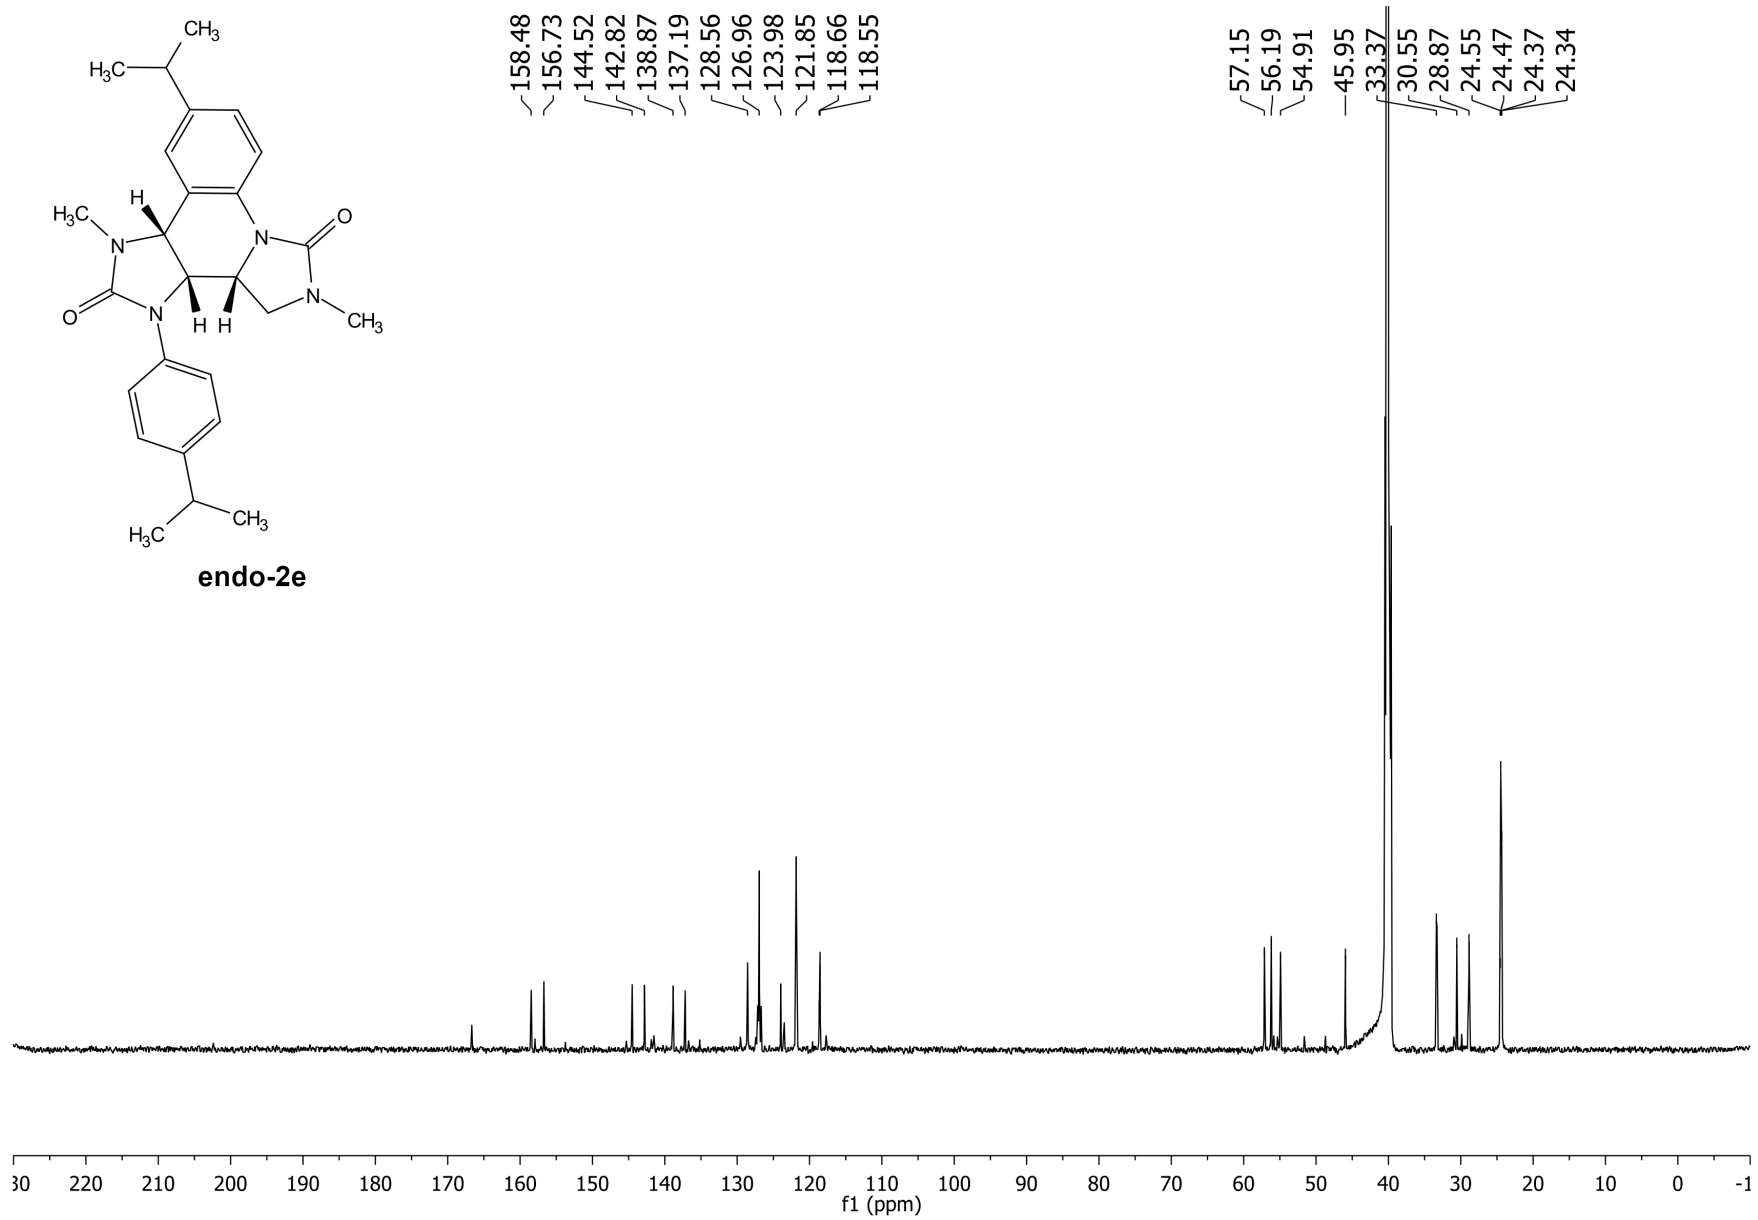

Figure S94.  $^{13}\text{C}$  NMR spectrum ( $(\text{CD}_3)_2\text{SO}$ , 151MHz) of the compound *endo-2e*

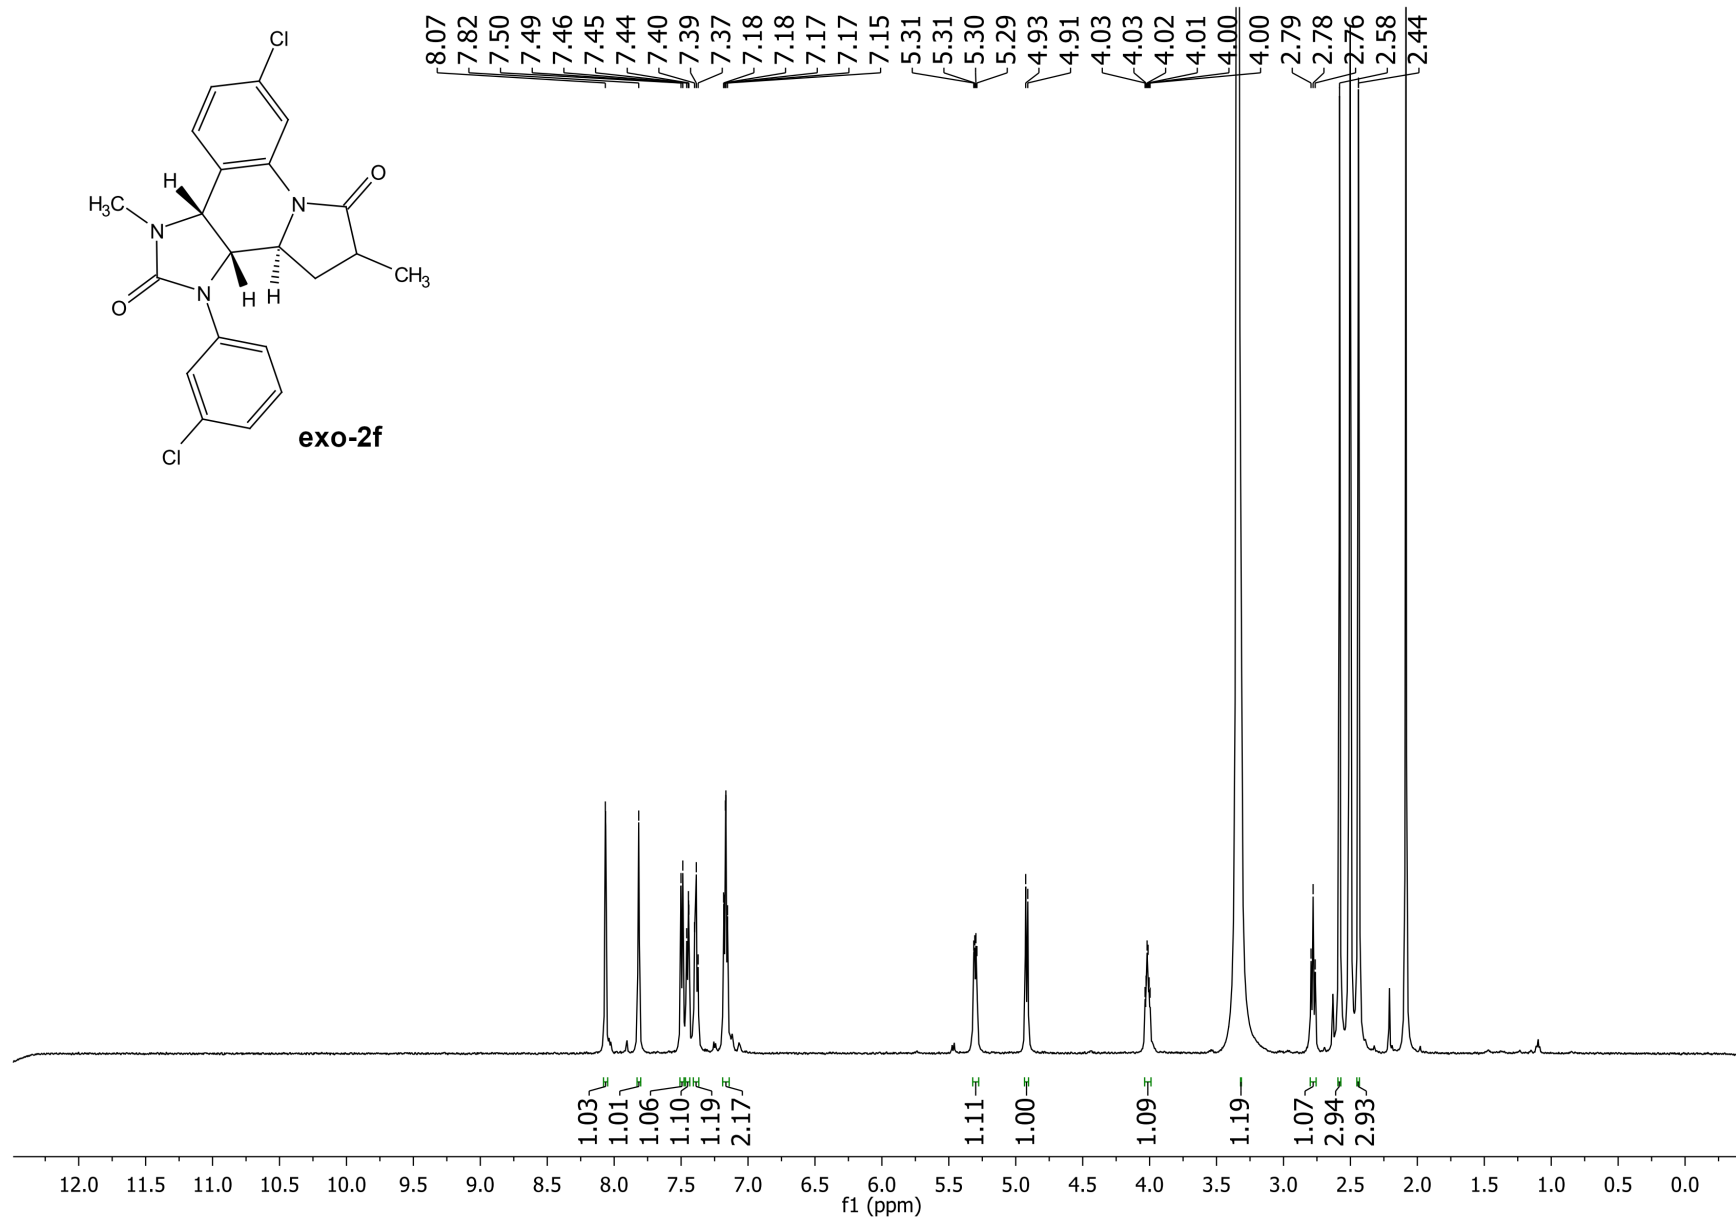

Figure S95. <sup>1</sup>H NMR spectrum ((CD<sub>3</sub>)<sub>2</sub>SO, 600MHz) of the compound **exo-2f**

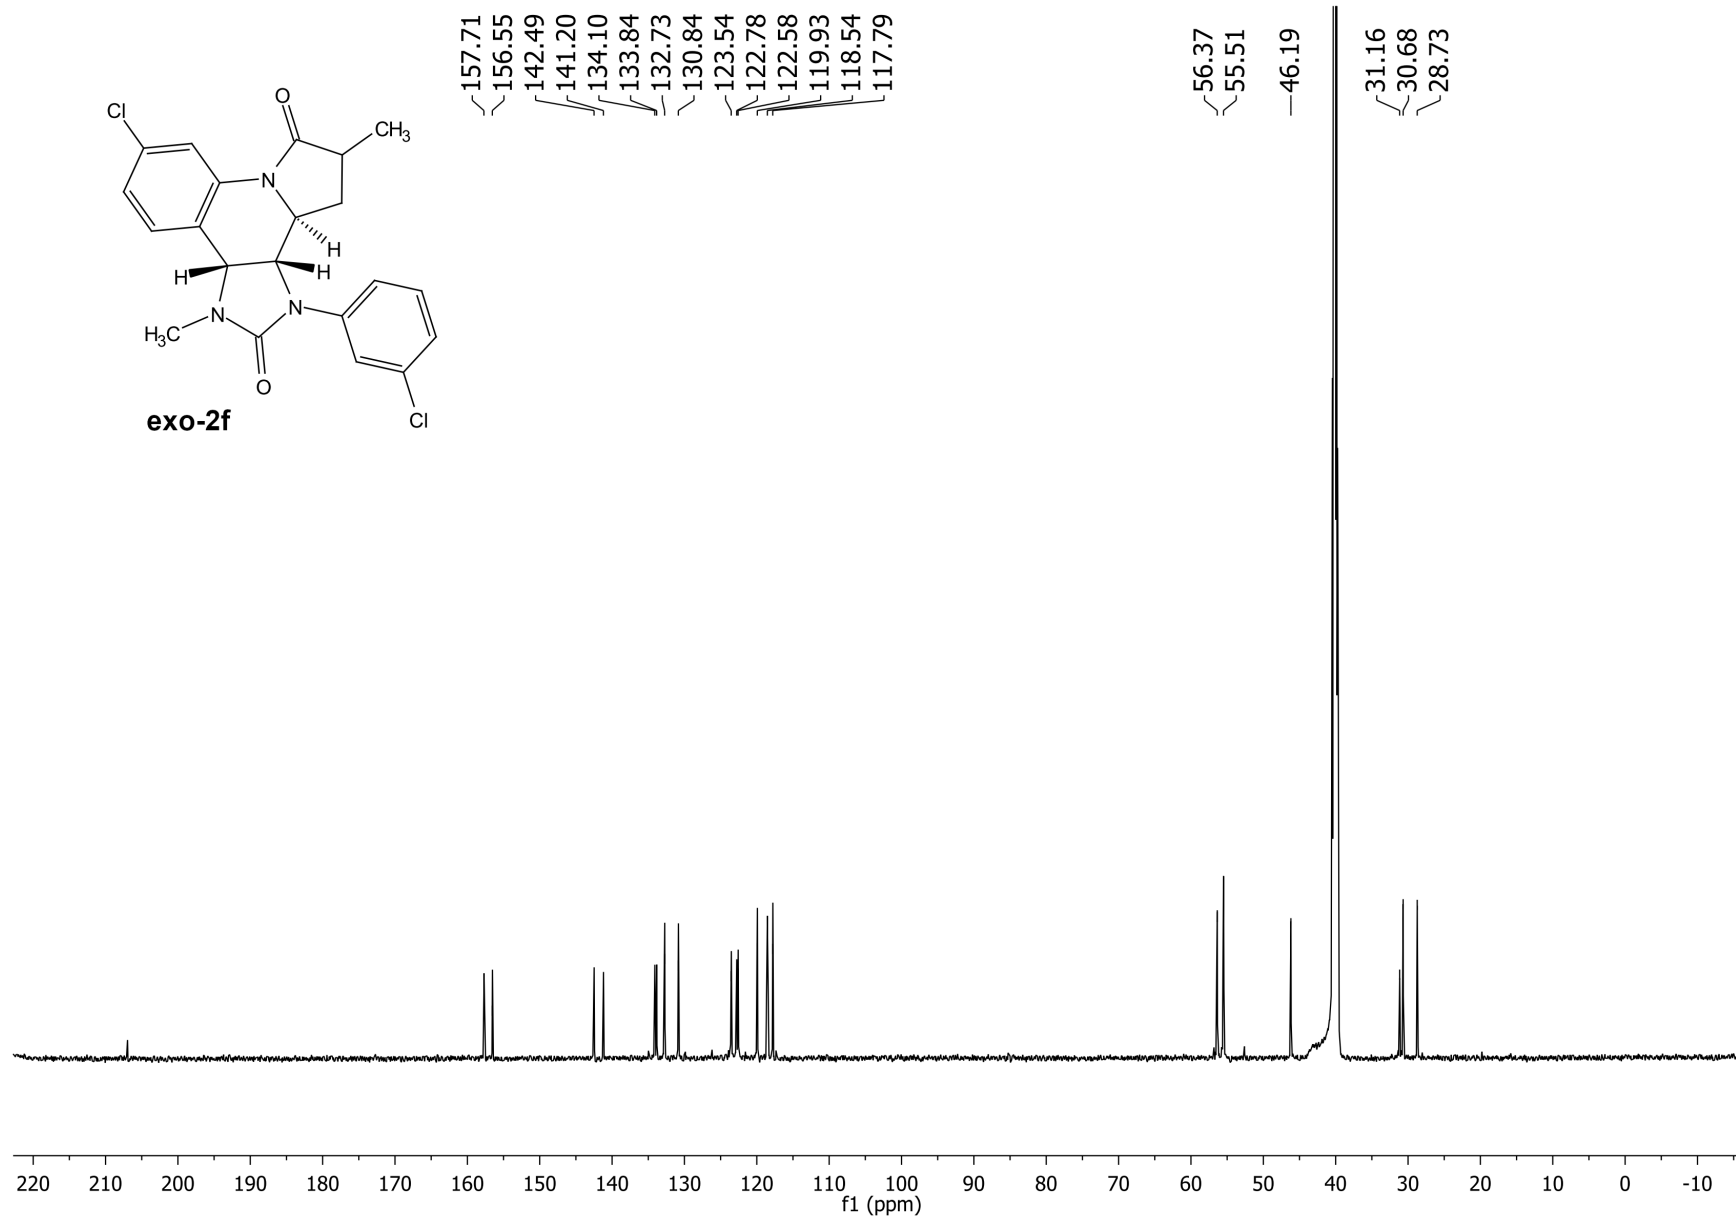

Figure S96. <sup>13</sup>C NMR spectrum ((CD<sub>3</sub>)<sub>2</sub>SO, 151MHz) of the compound **exo-2f**

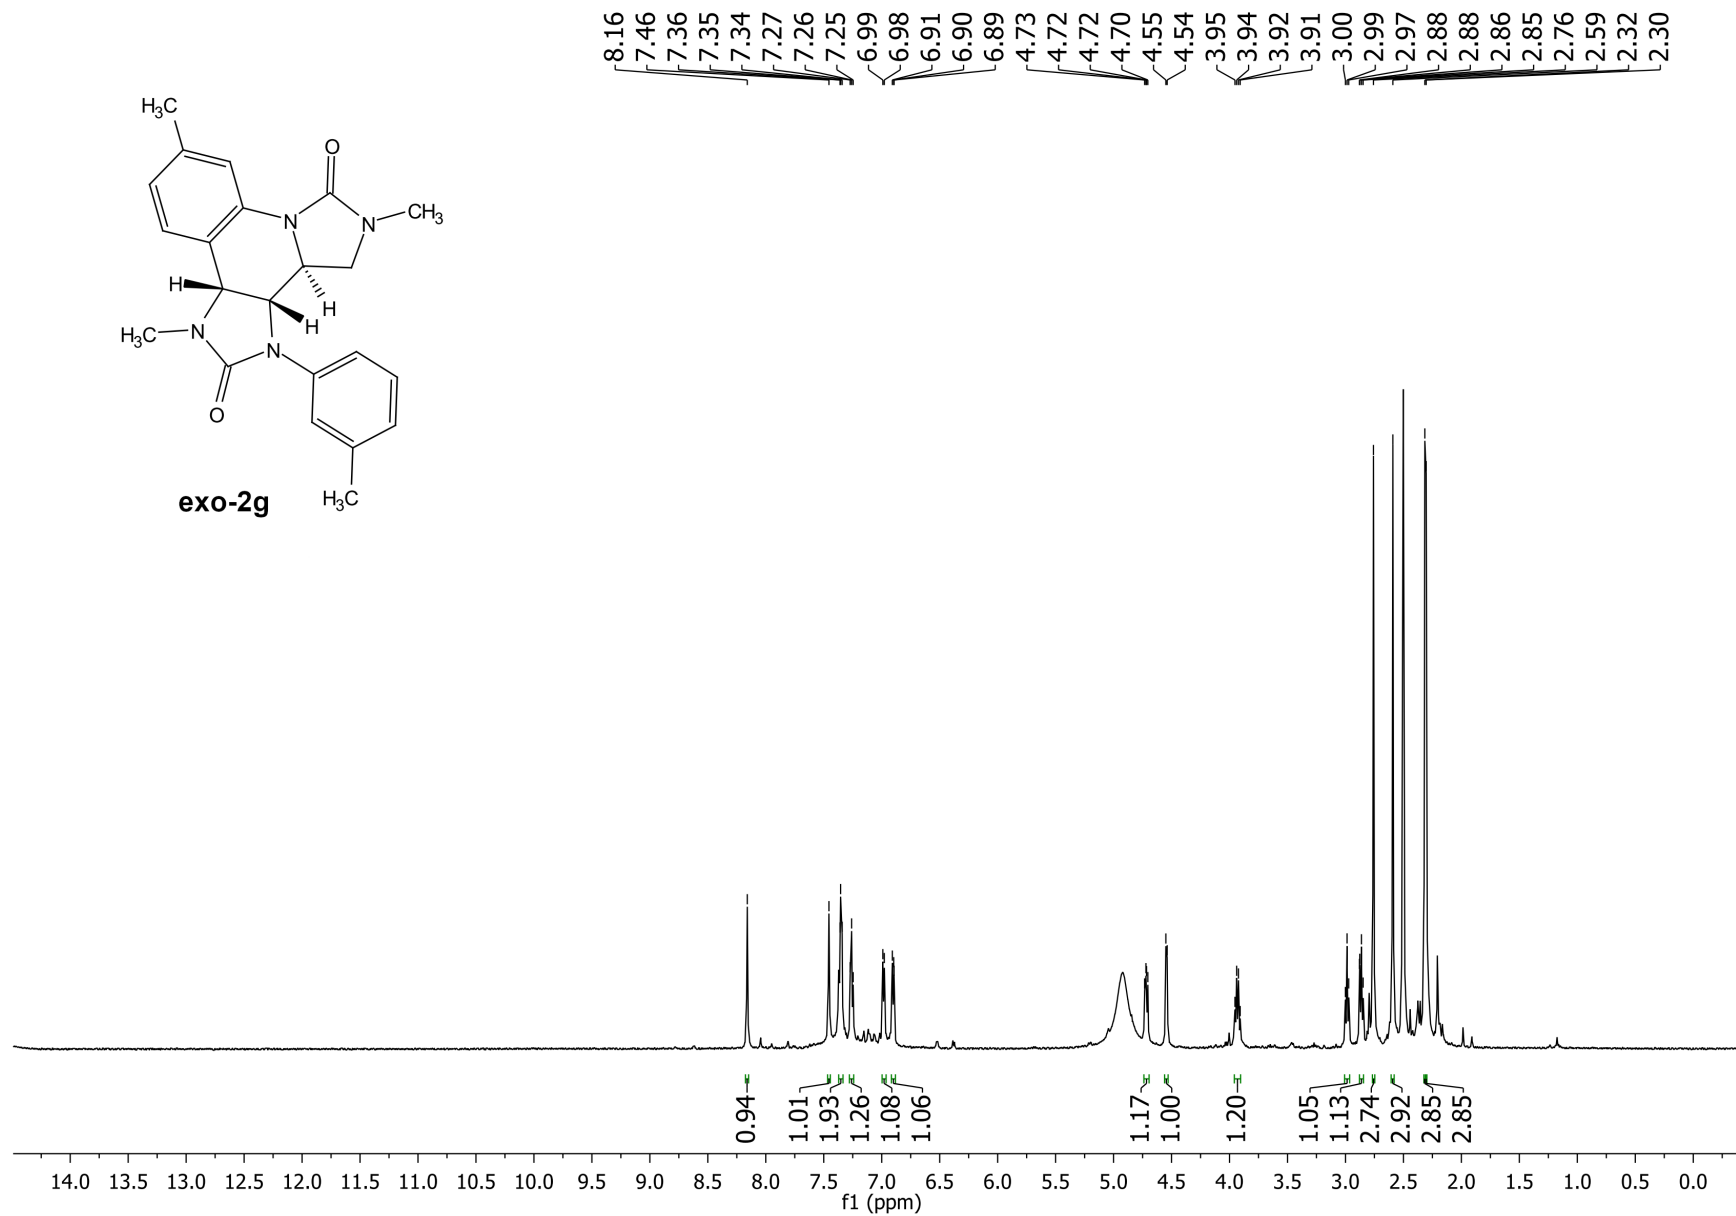

Figure S97.  $^1\text{H}$  NMR spectrum ( $(\text{CD}_3)_2\text{SO}$ , 500MHz) of the compound **exo-2g**

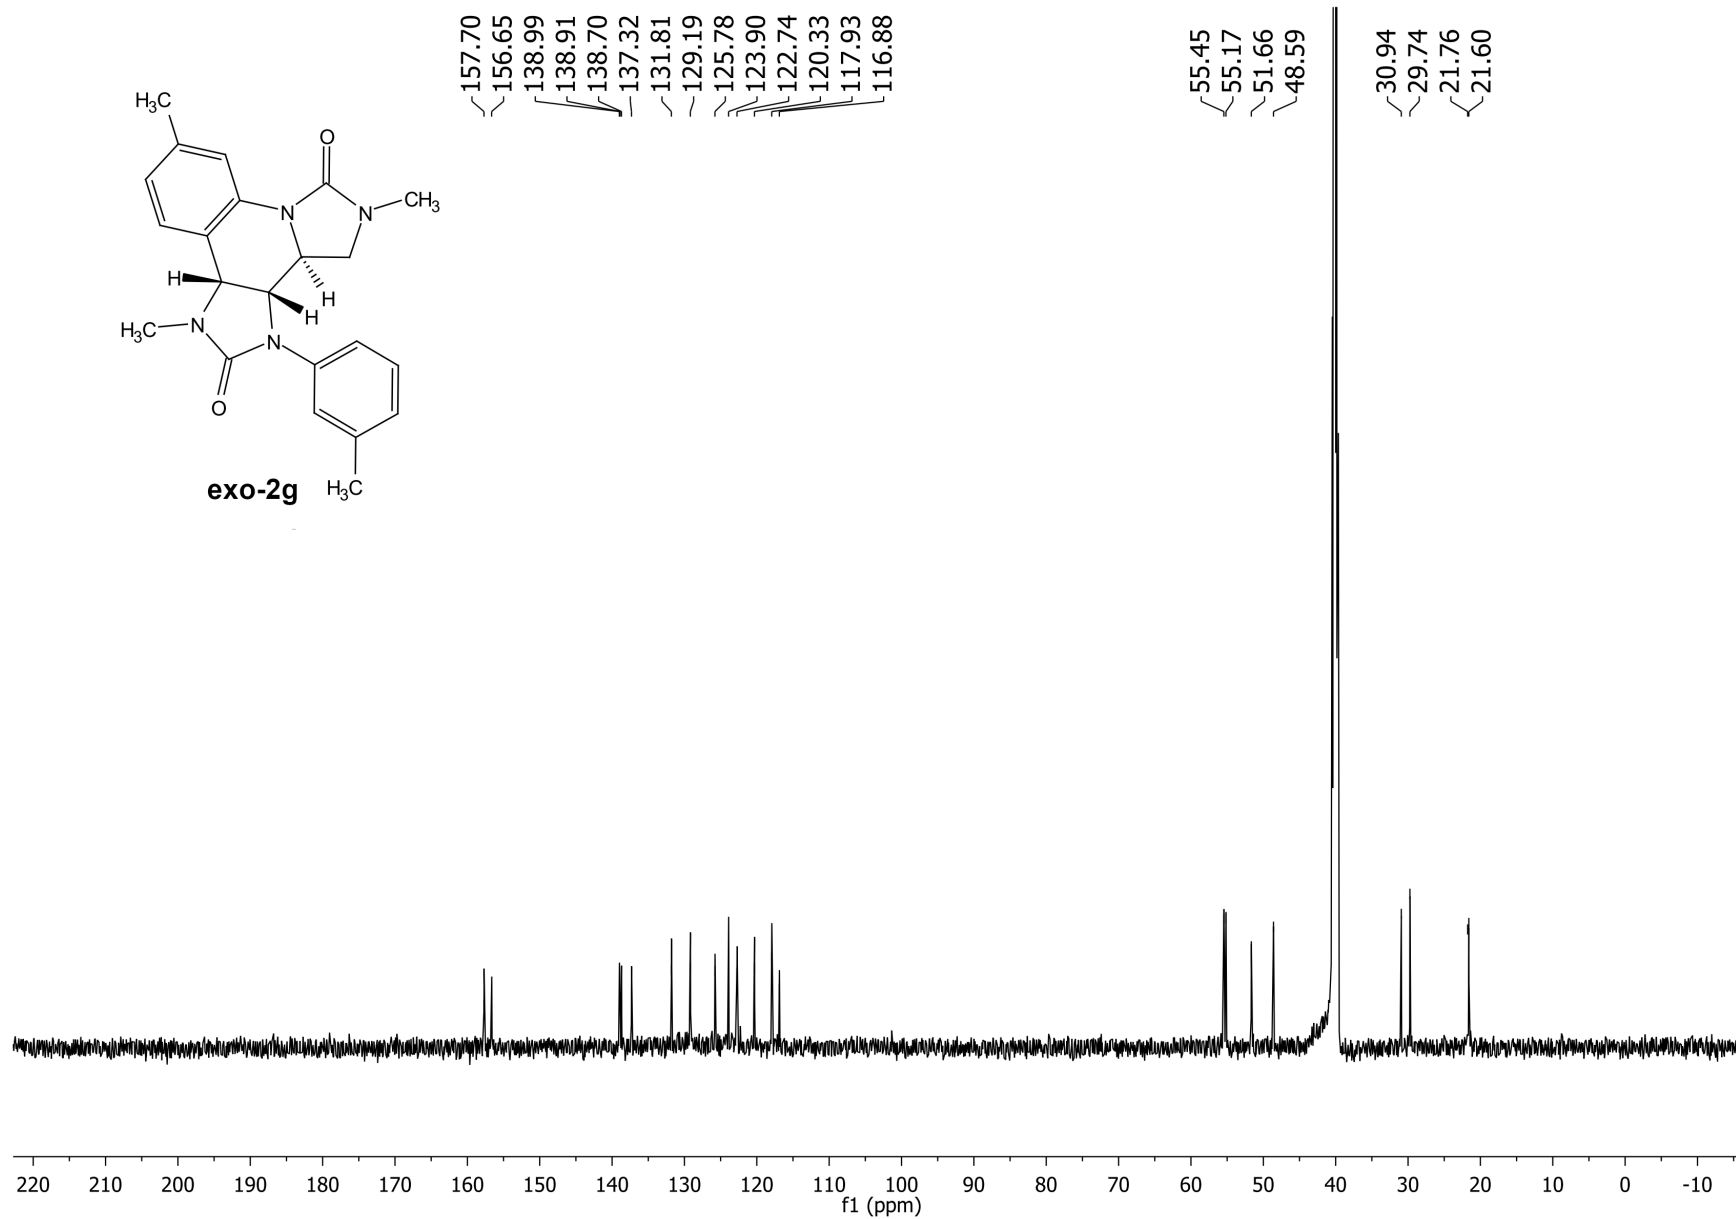

Figure S98. <sup>13</sup>C NMR spectrum ((CD<sub>3</sub>)<sub>2</sub>SO, 126MHz) of the compound **exo-2g**

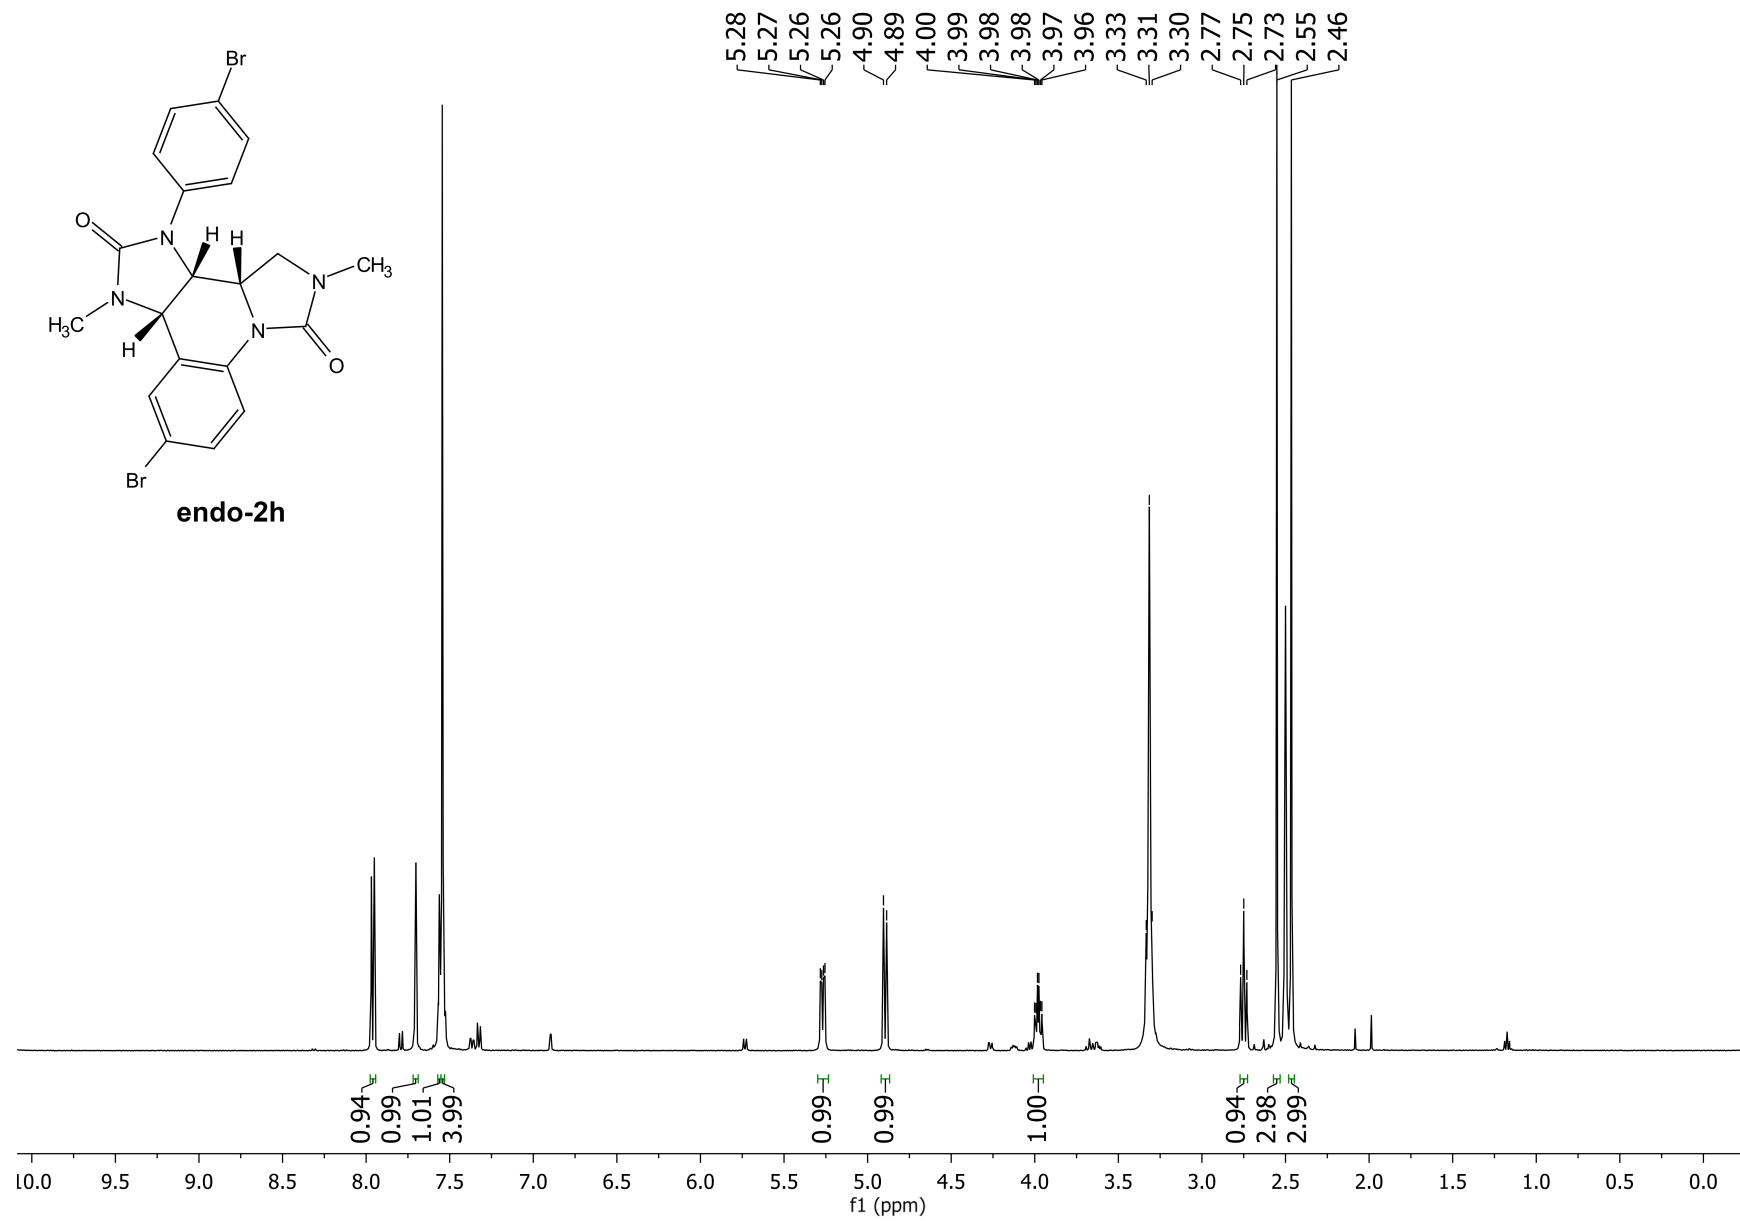

Figure S99. <sup>1</sup>H NMR spectrum ((CD<sub>3</sub>)<sub>2</sub>SO, 500MHz) of the compound **endo-2h**

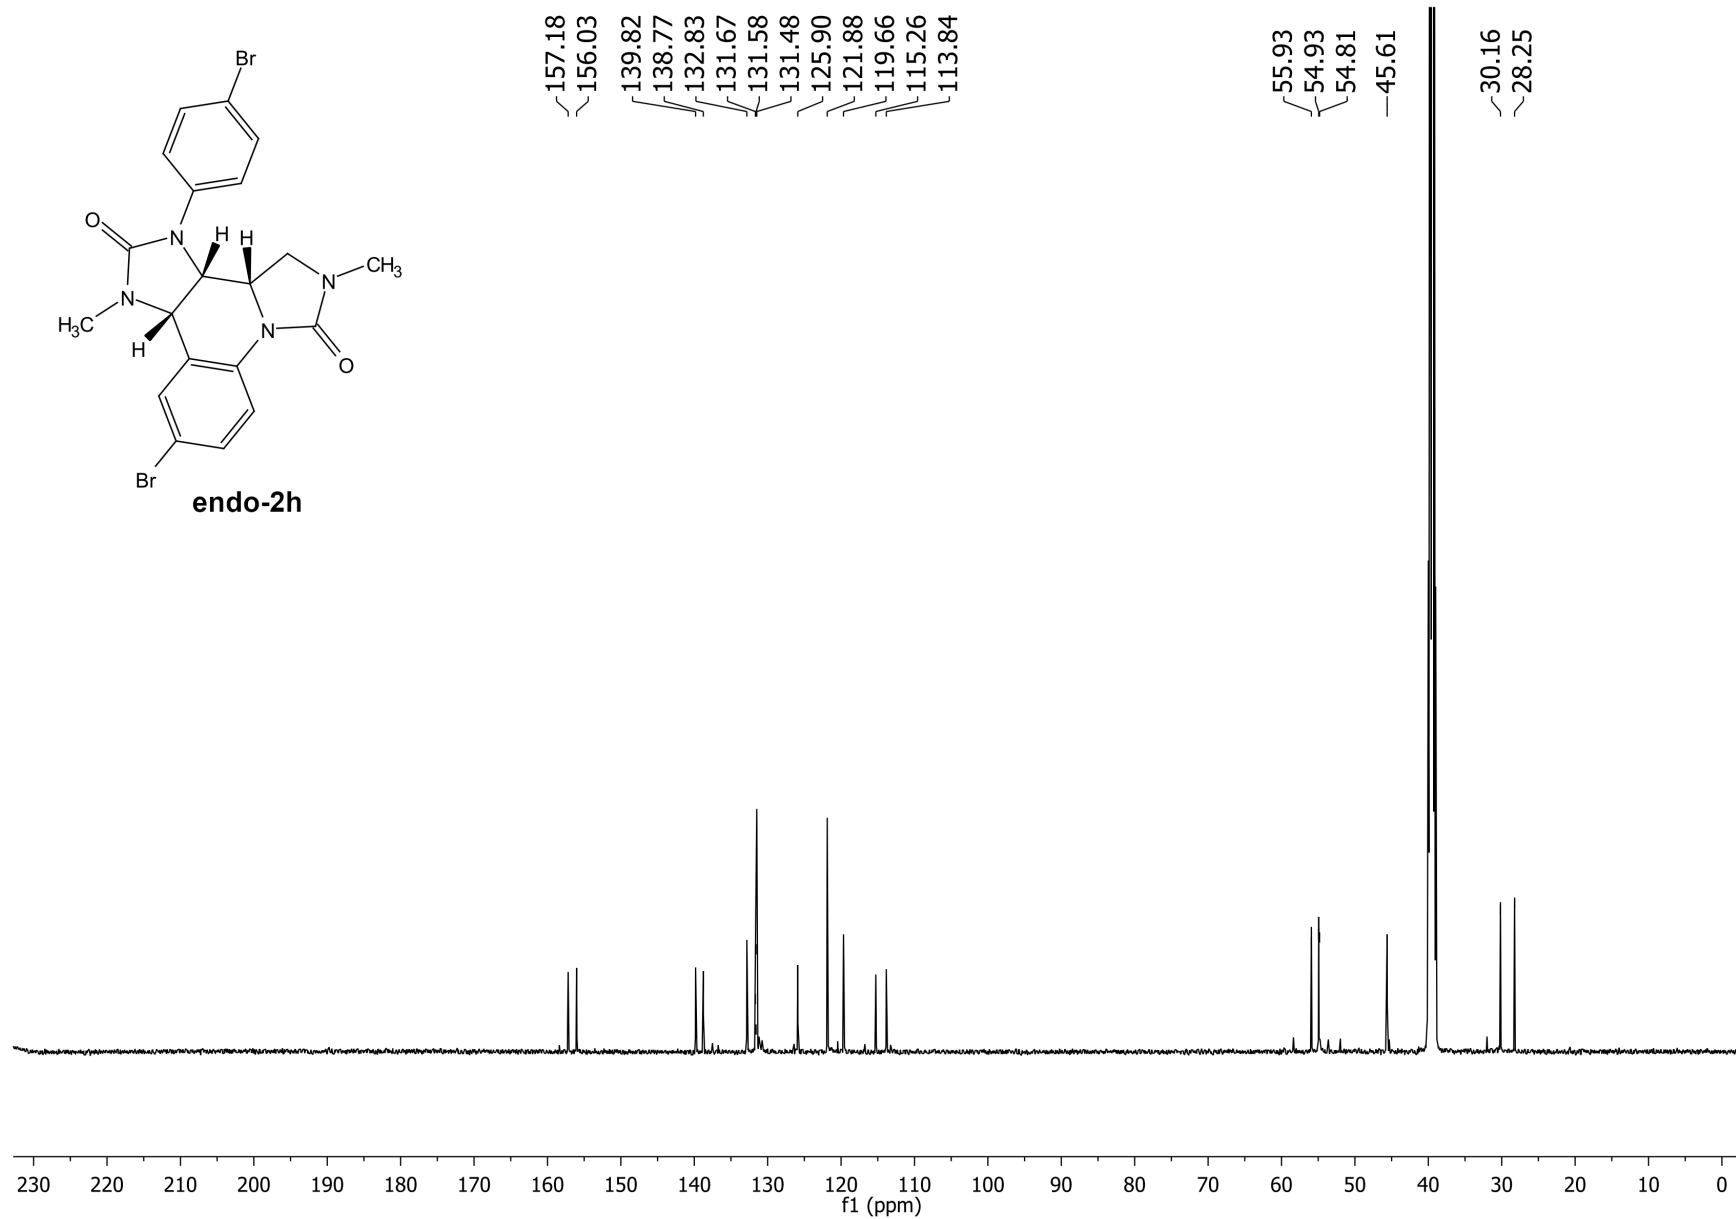

Figure S100.  $^{13}\text{C}$  NMR spectrum ( $(\text{CD}_3)_2\text{SO}$ , 151MHz) of the compound **endo-2h**



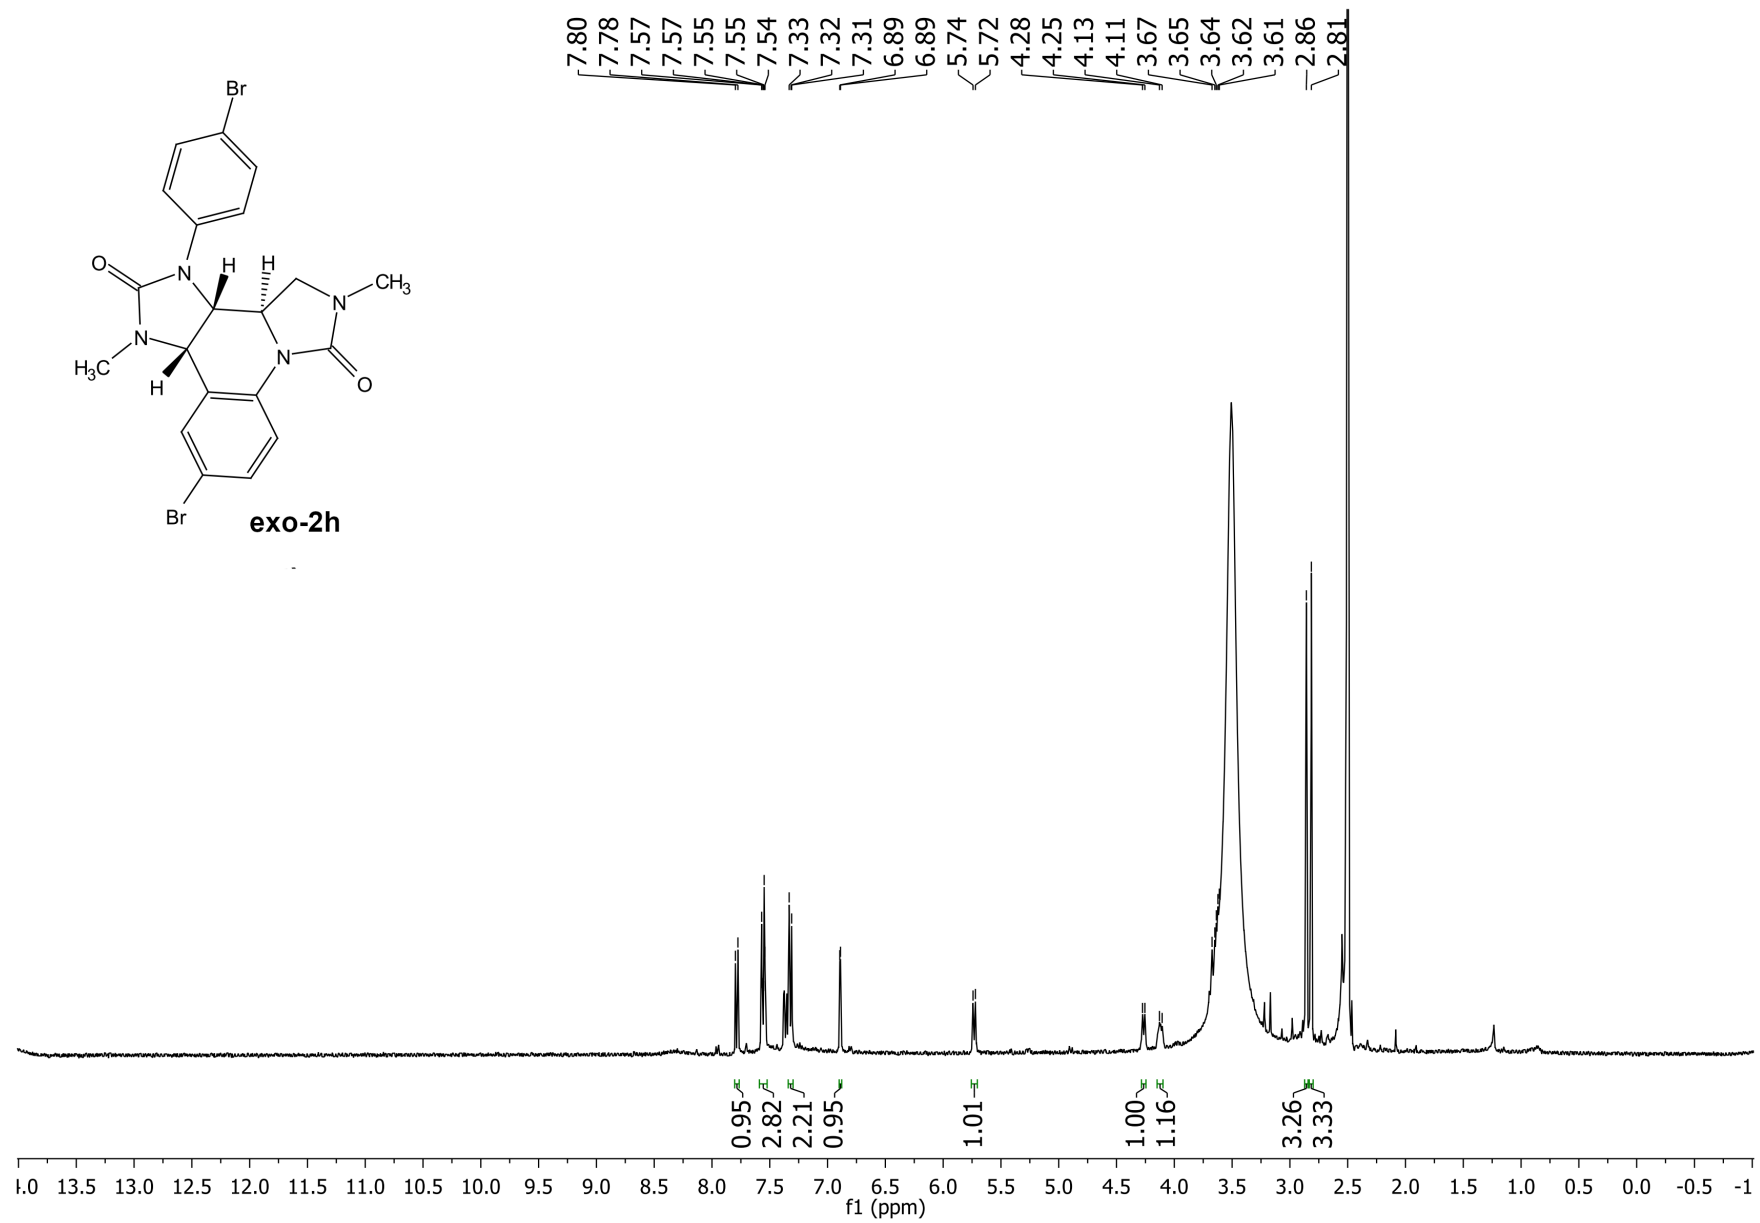

Figure S101. <sup>1</sup>H NMR spectrum ((CD<sub>3</sub>)<sub>2</sub>SO, 400MHz) of the compound **exo-2h**

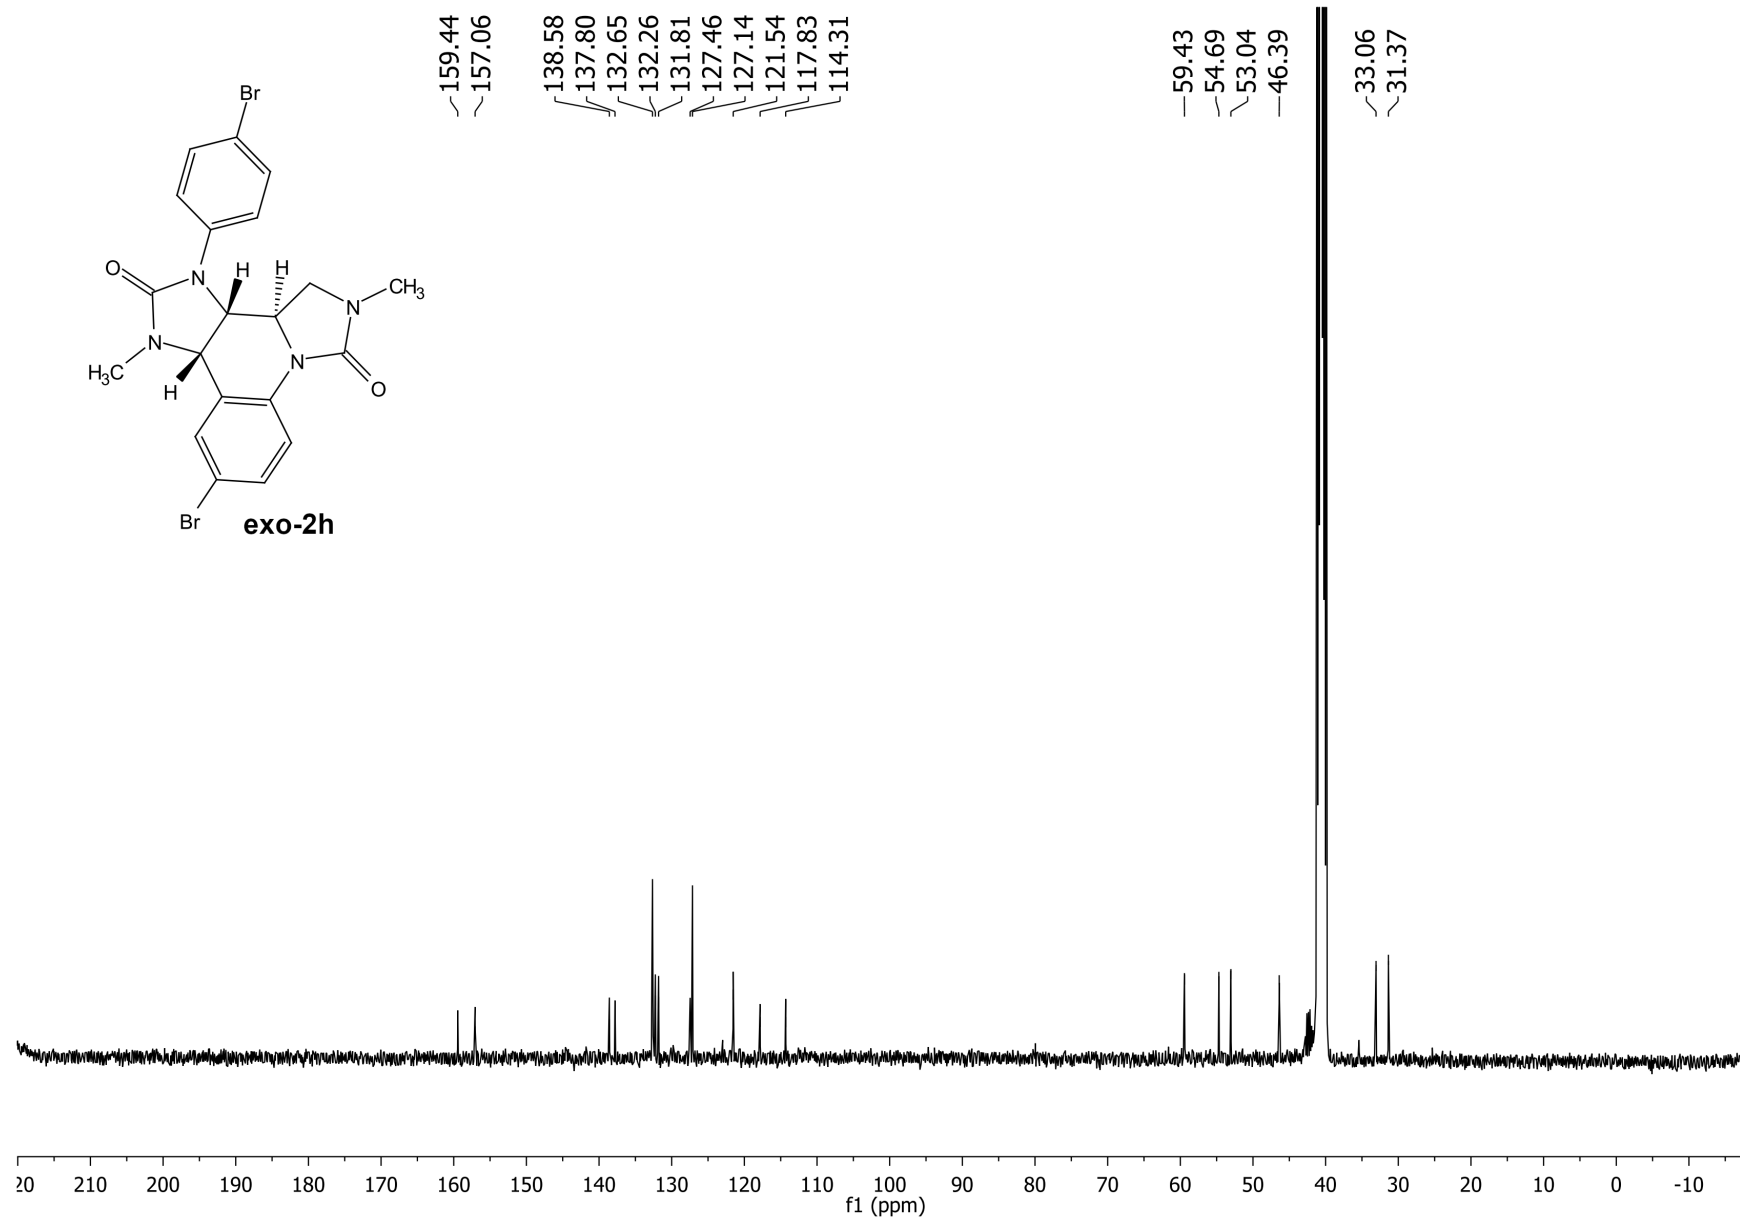

Figure S102. <sup>13</sup>C NMR spectrum ((CD<sub>3</sub>)<sub>2</sub>SO, 151MHz) of the compound **exo-2h**

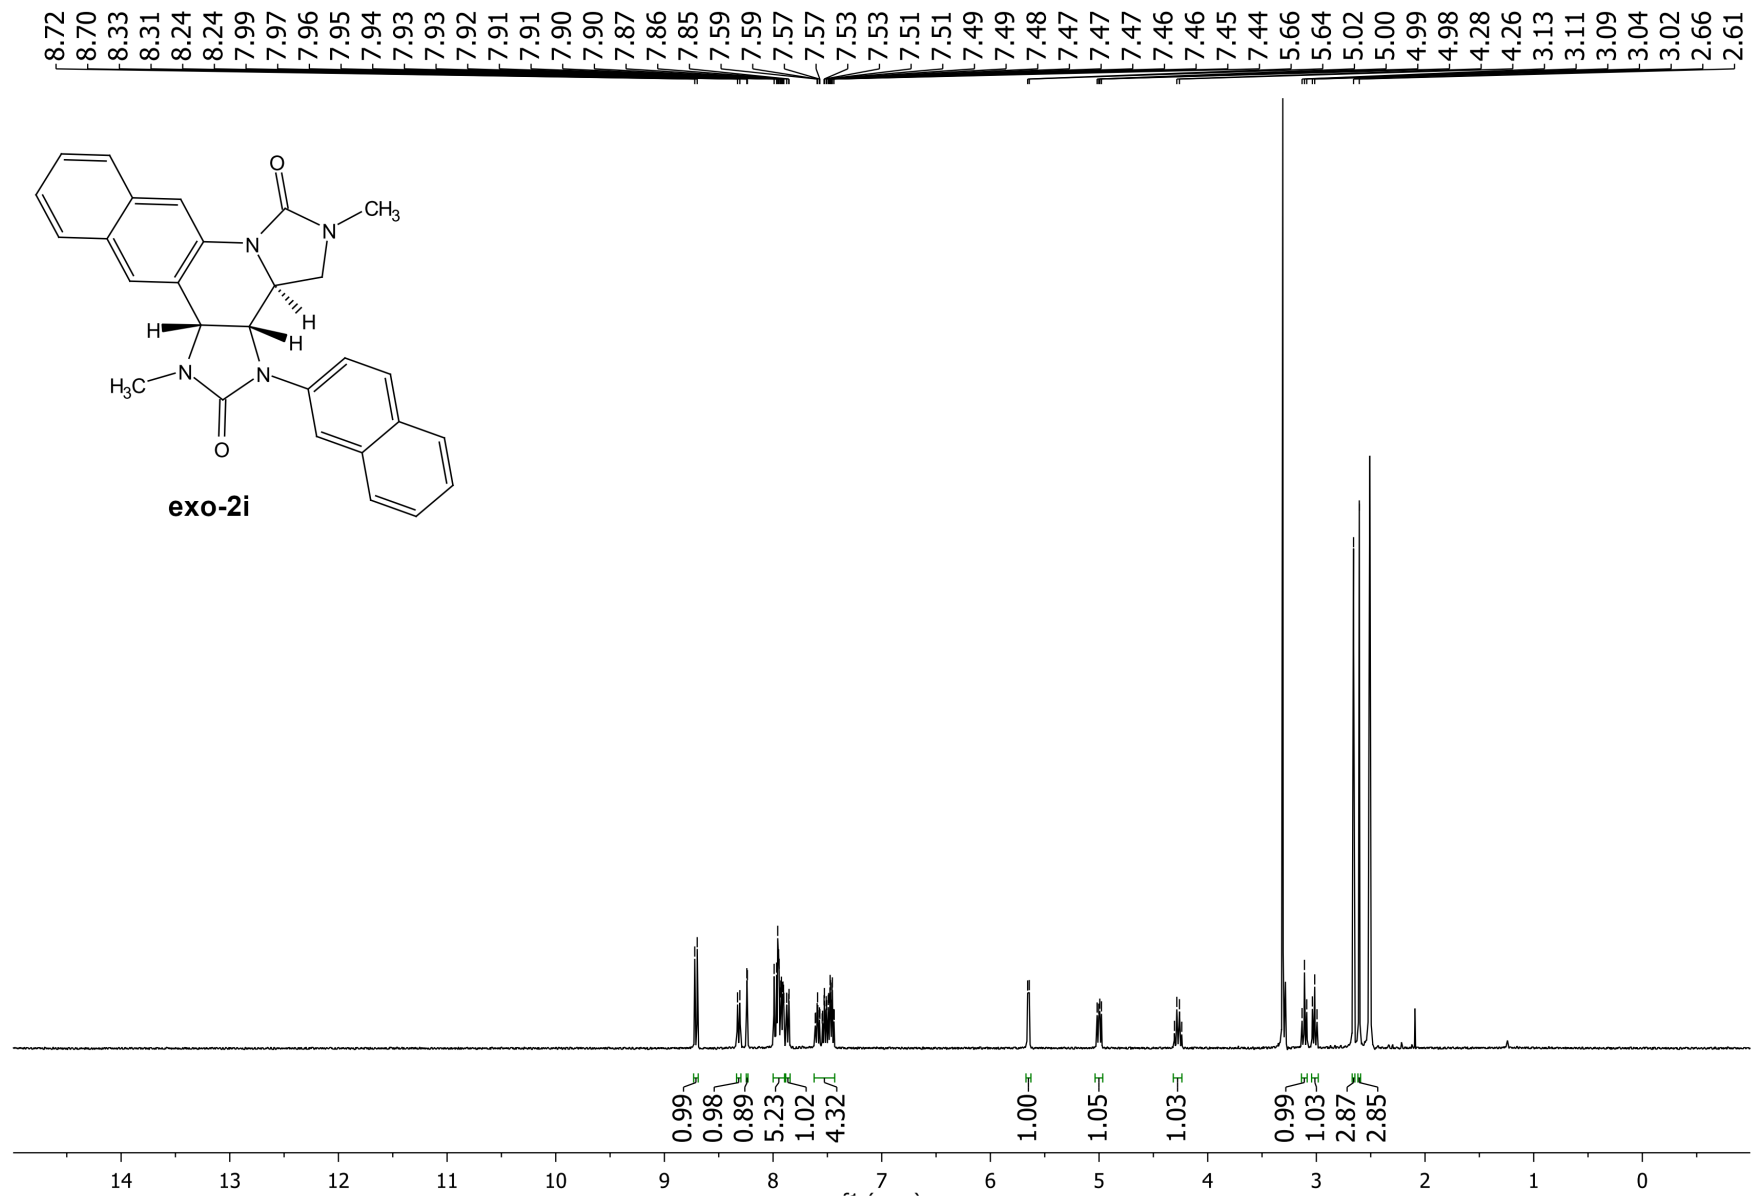

Figure S103. <sup>1</sup>H NMR spectrum ((CD<sub>3</sub>)<sub>2</sub>SO, 400MHz) of the compound **exo-2i**

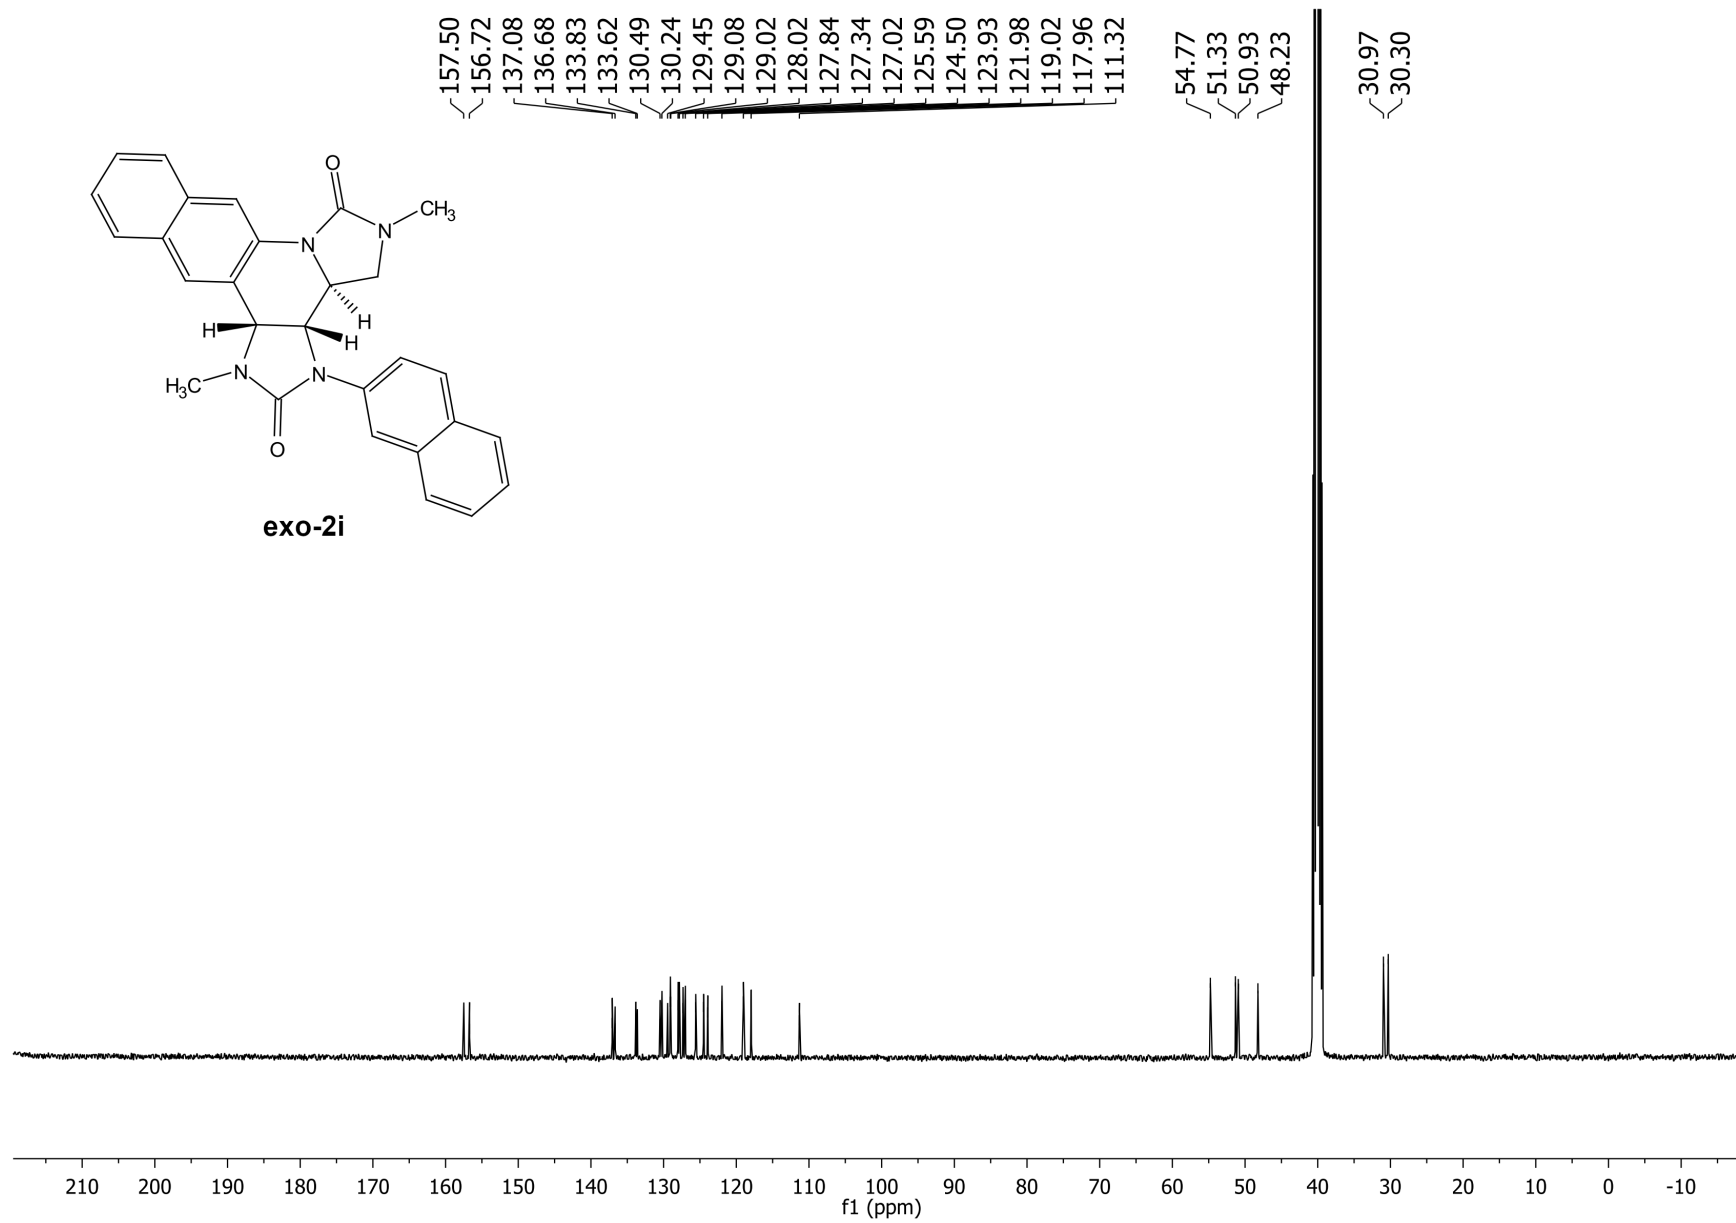

Figure S104. <sup>13</sup>C NMR spectrum ((CD<sub>3</sub>)<sub>2</sub>SO, 151MHz) of the compound **exo-2i**

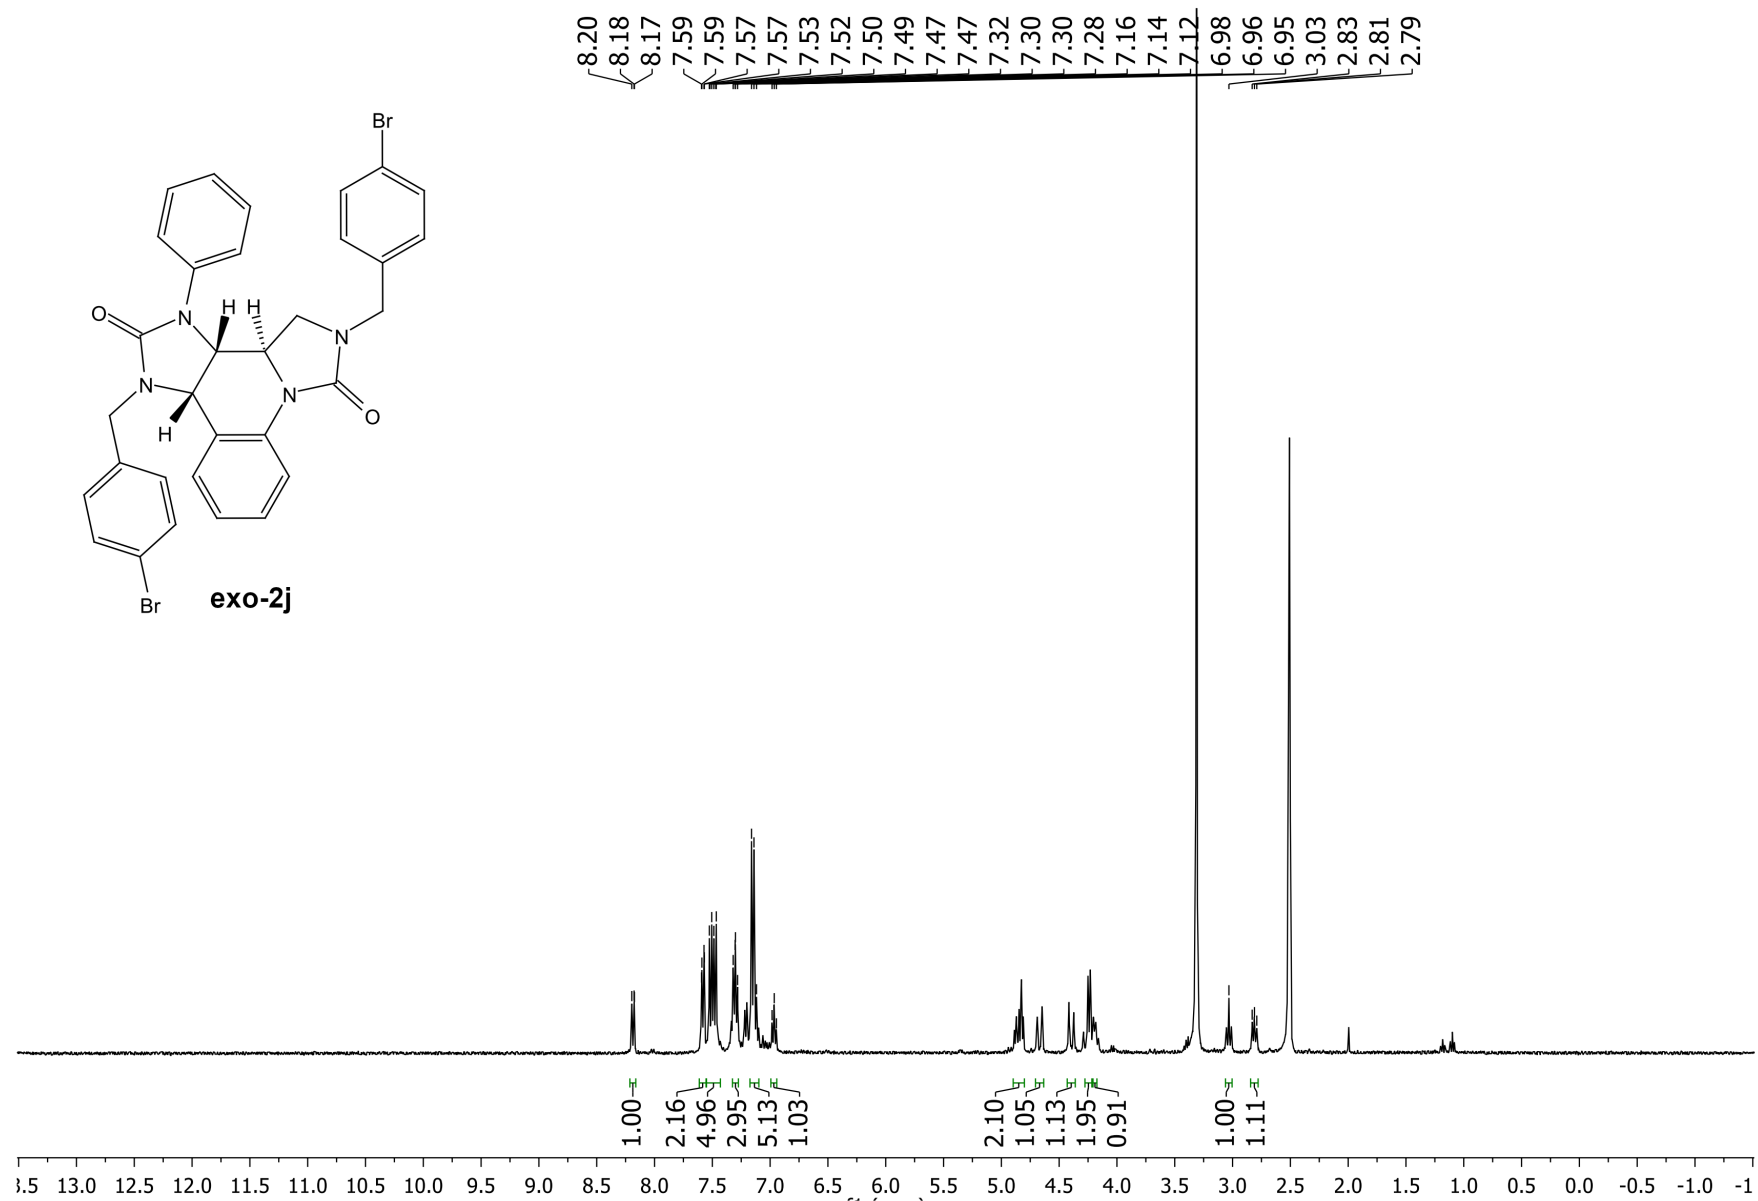

Figure S105.  $^1\text{H}$  NMR spectrum ( $(\text{CD}_3)_2\text{SO}$ , 400MHz) of the compound **exo-2j**

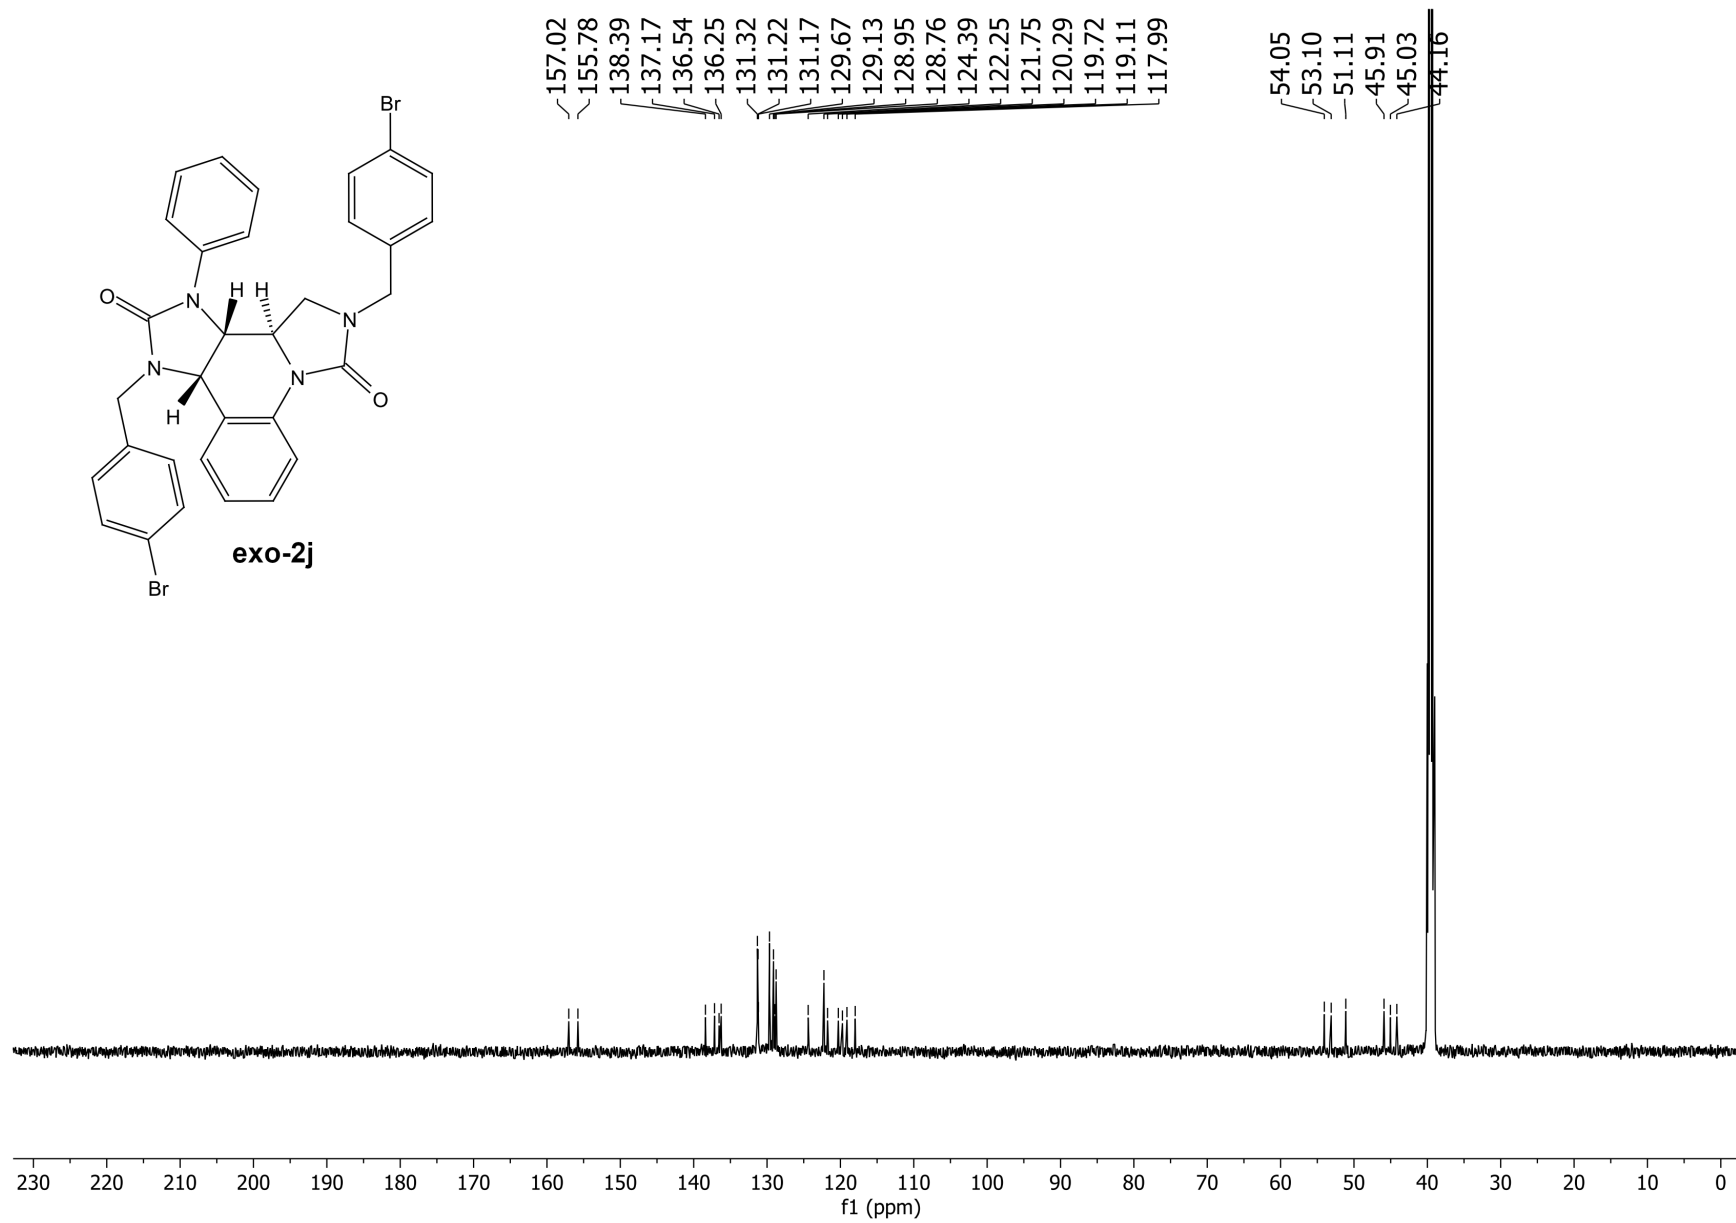

Figure S106. <sup>13</sup>C NMR spectrum ((CD<sub>3</sub>)<sub>2</sub>SO, 151MHz) of the compound **exo-2j**

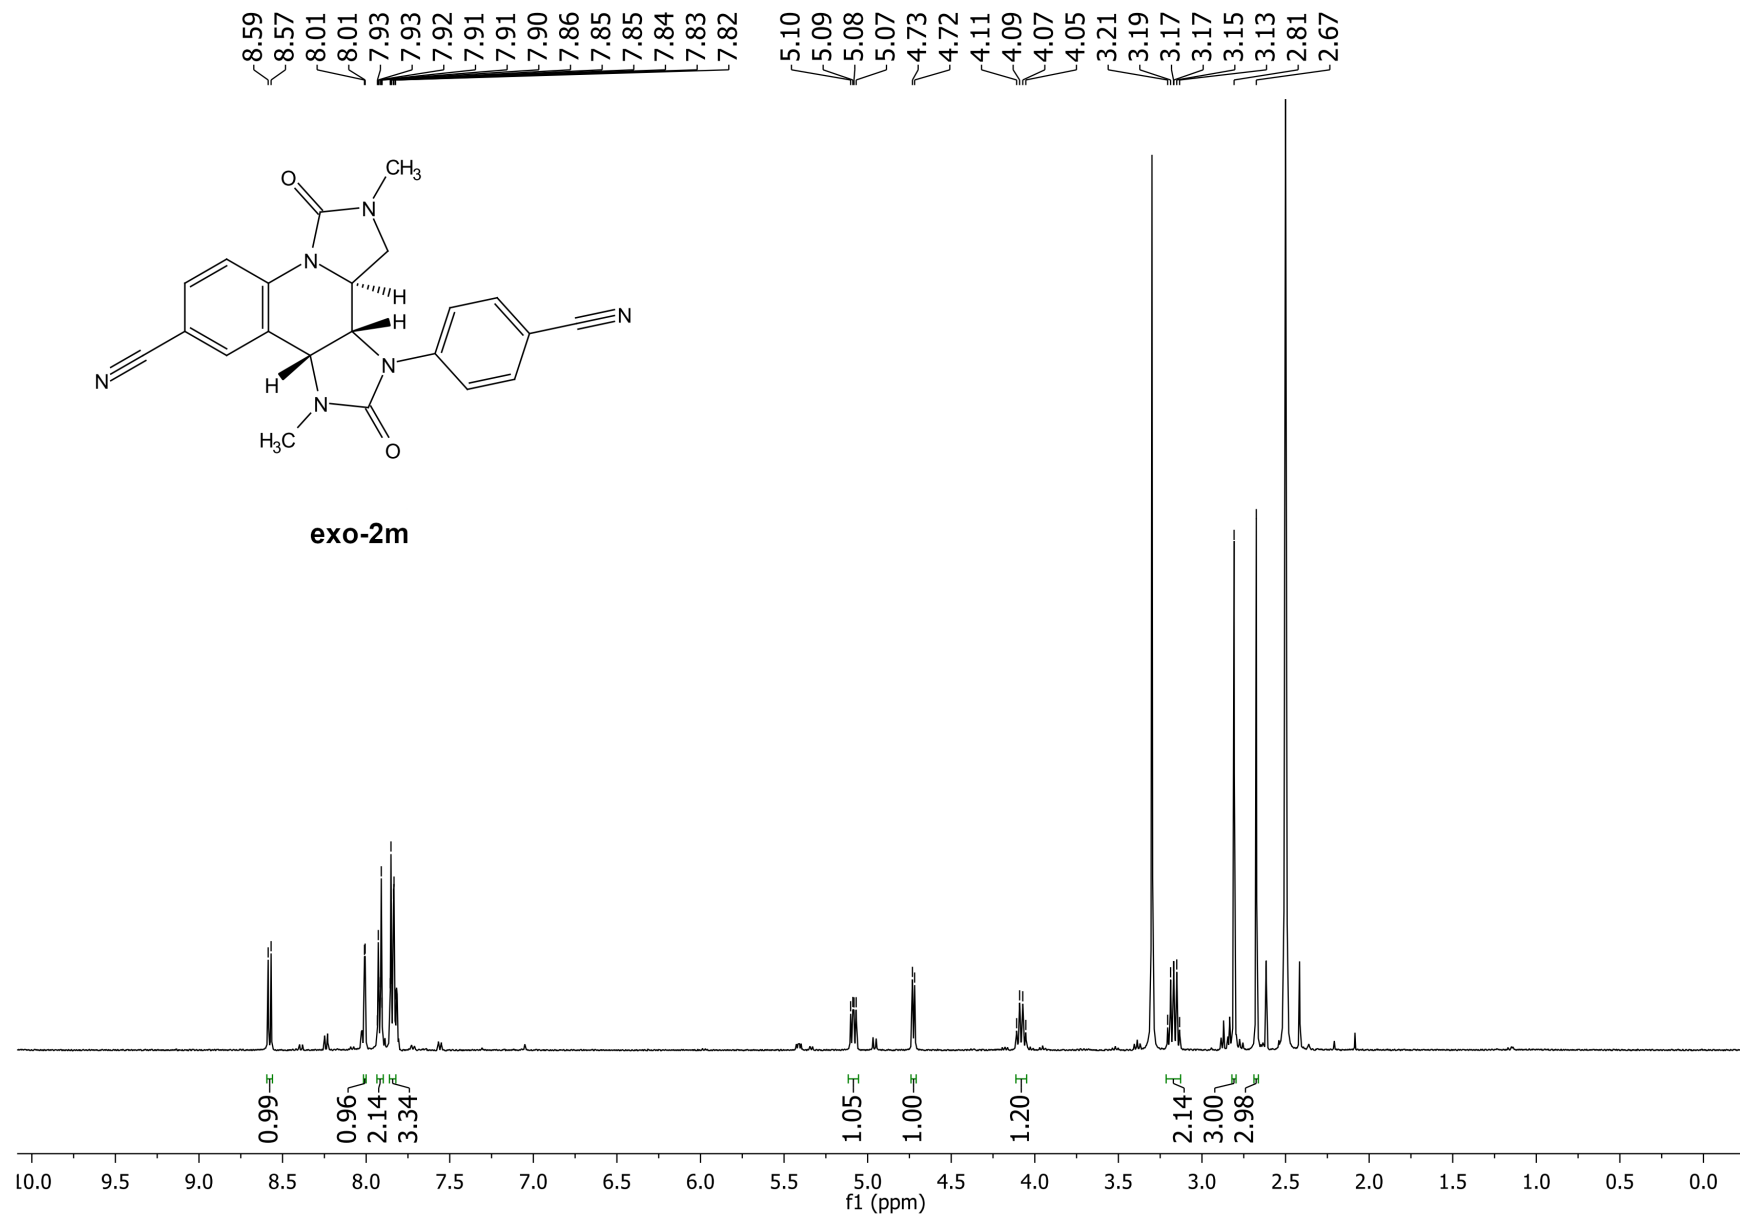

Figure S107.  $^1\text{H}$  NMR spectrum ( $(\text{CD}_3)_2\text{SO}$ , 400MHz) of the compound **exo-2m**

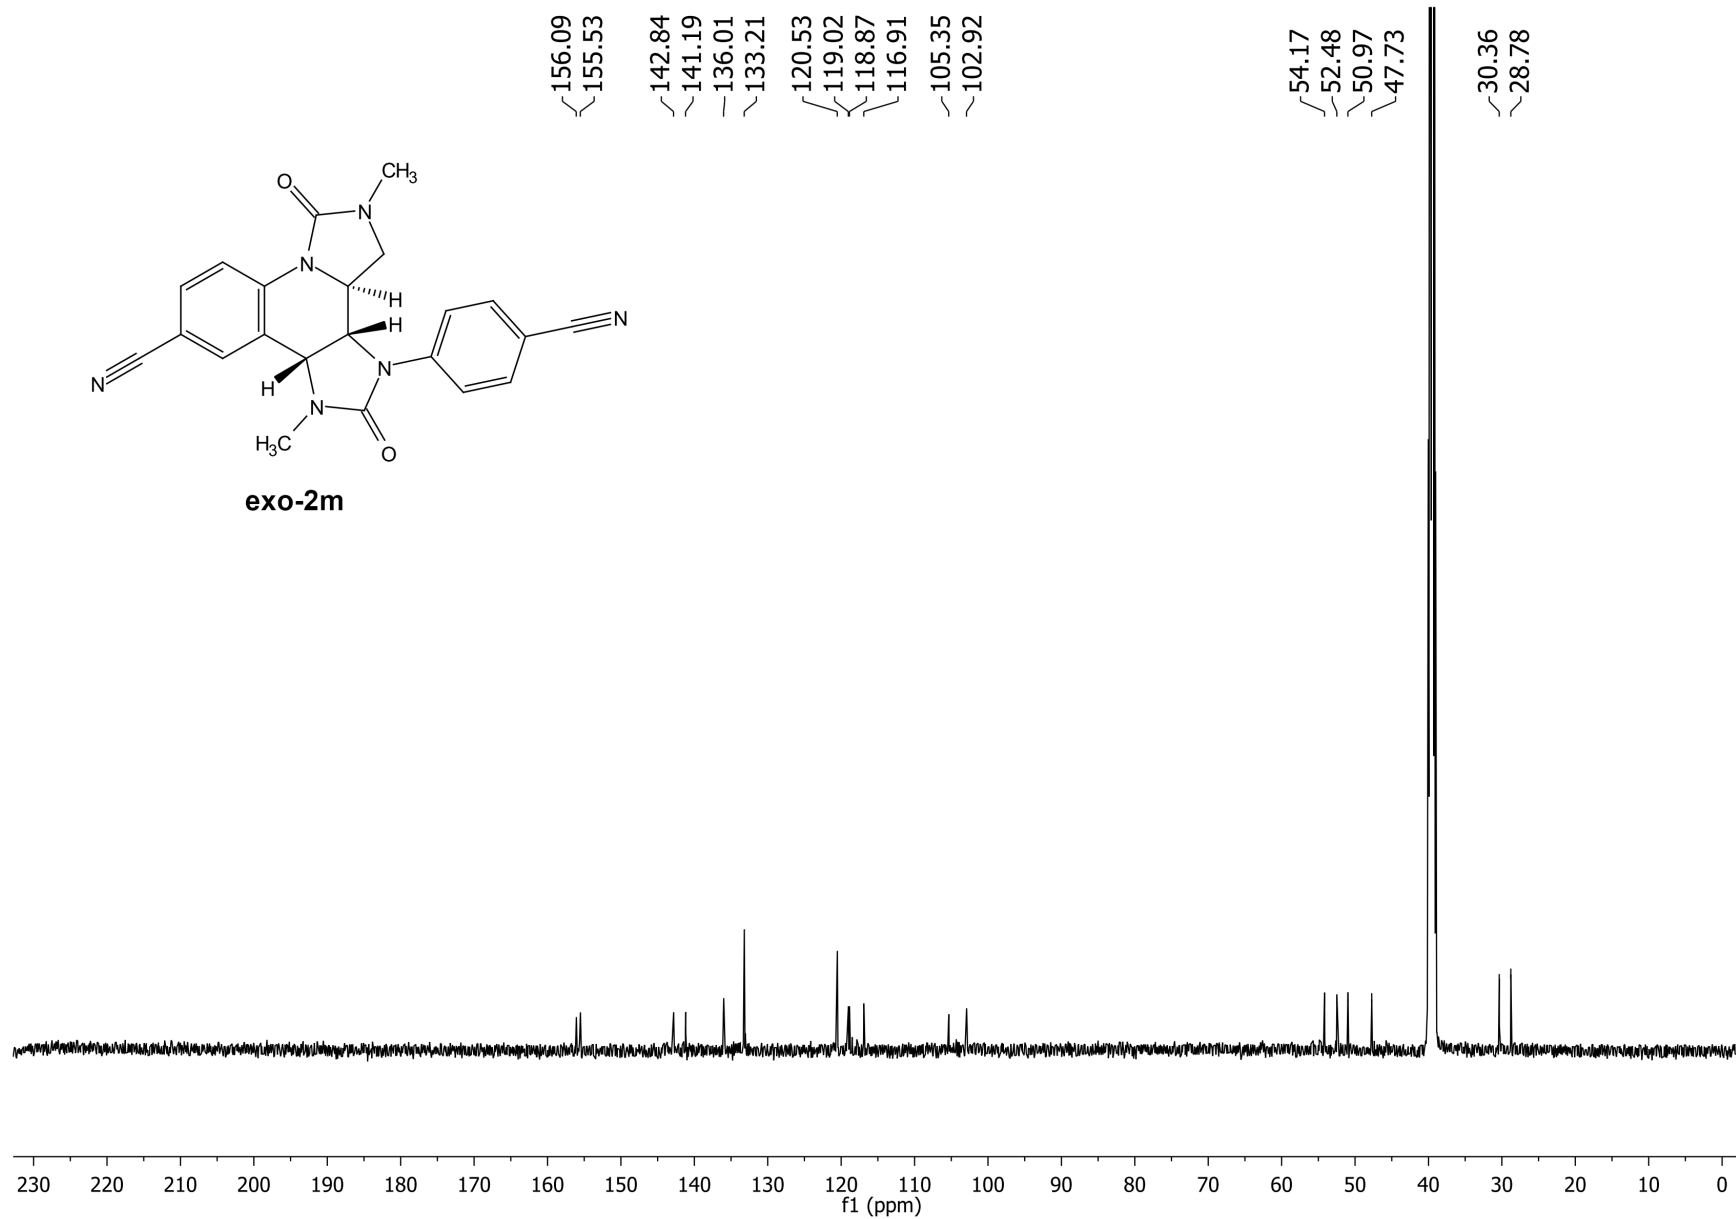

Figure S108.  $^{13}\text{C}$  NMR spectrum ( $(\text{CD}_3)_2\text{SO}$ , 151MHz) of the compound **exo-2m**



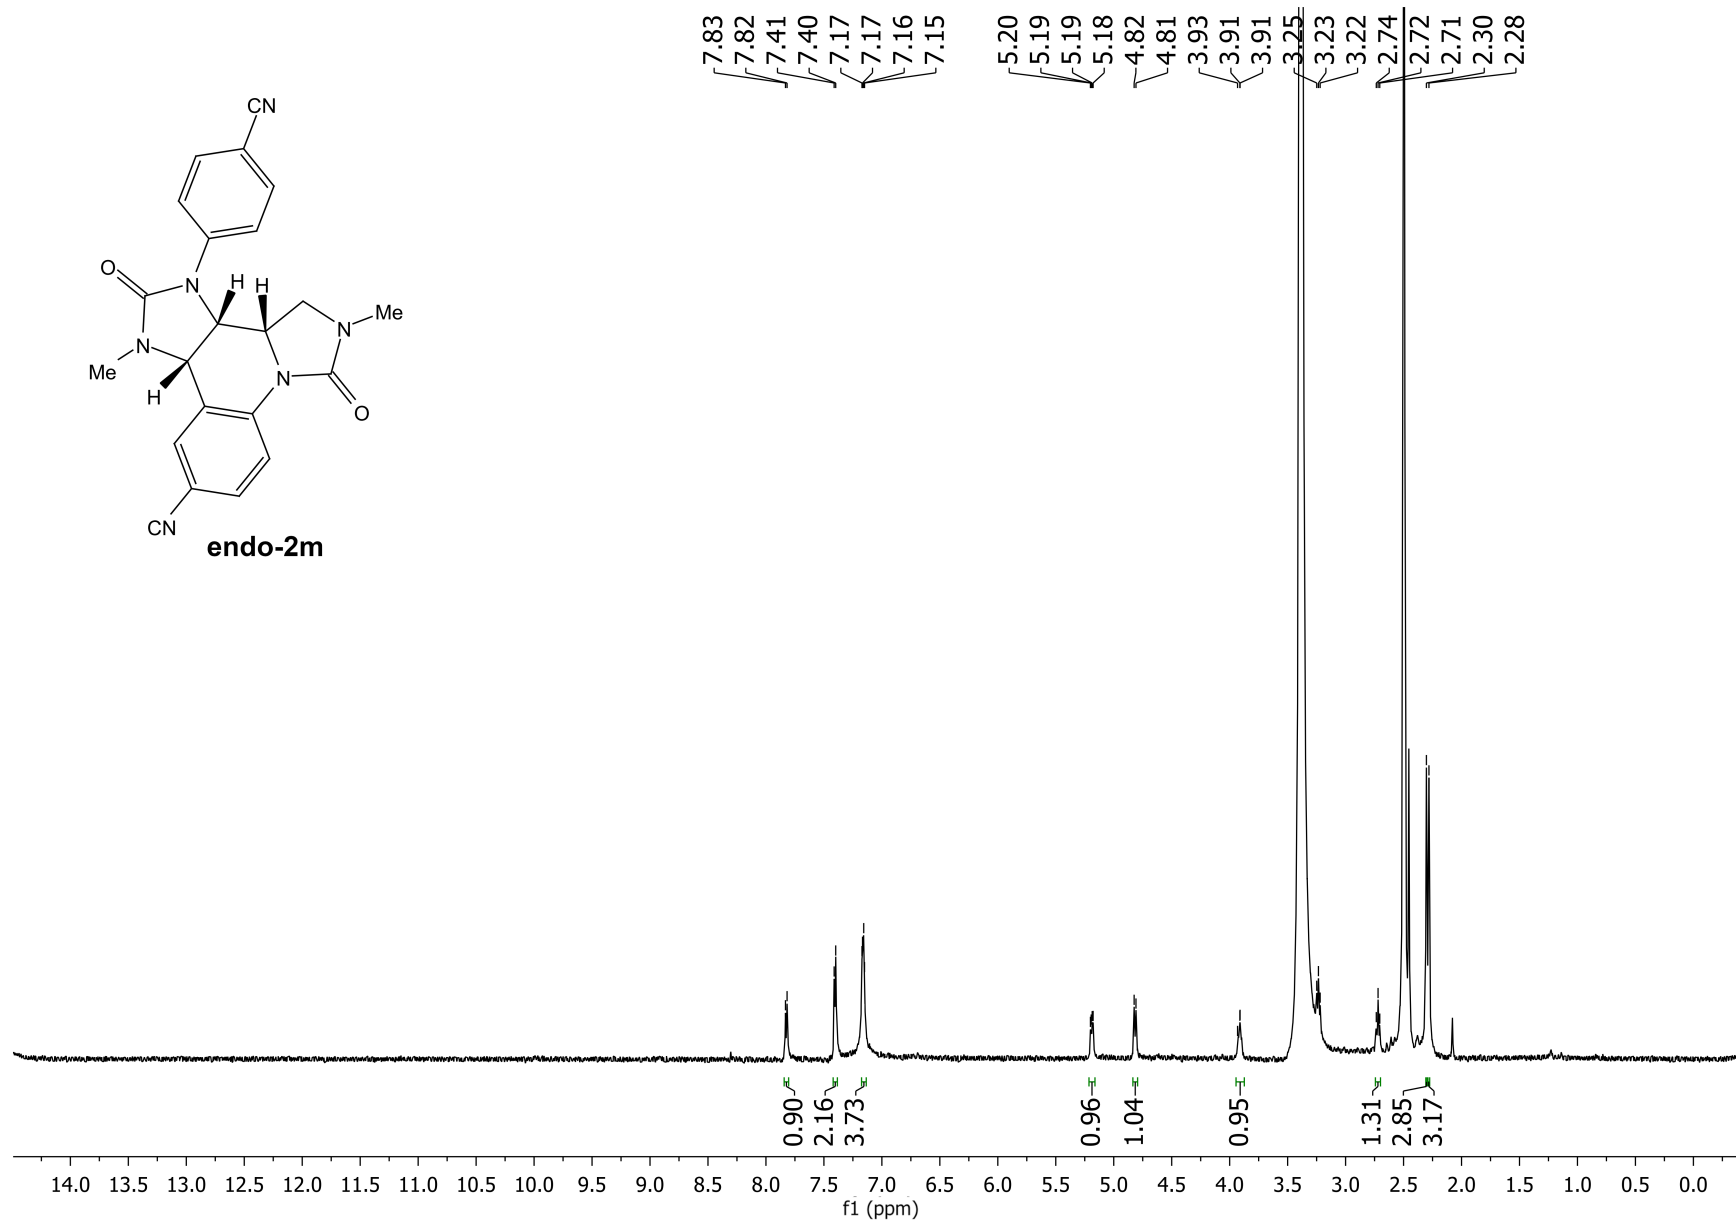

Figure S109. <sup>1</sup>H NMR spectrum ((CD<sub>3</sub>)<sub>2</sub>SO, 600MHz) of the compound **endo-2m**

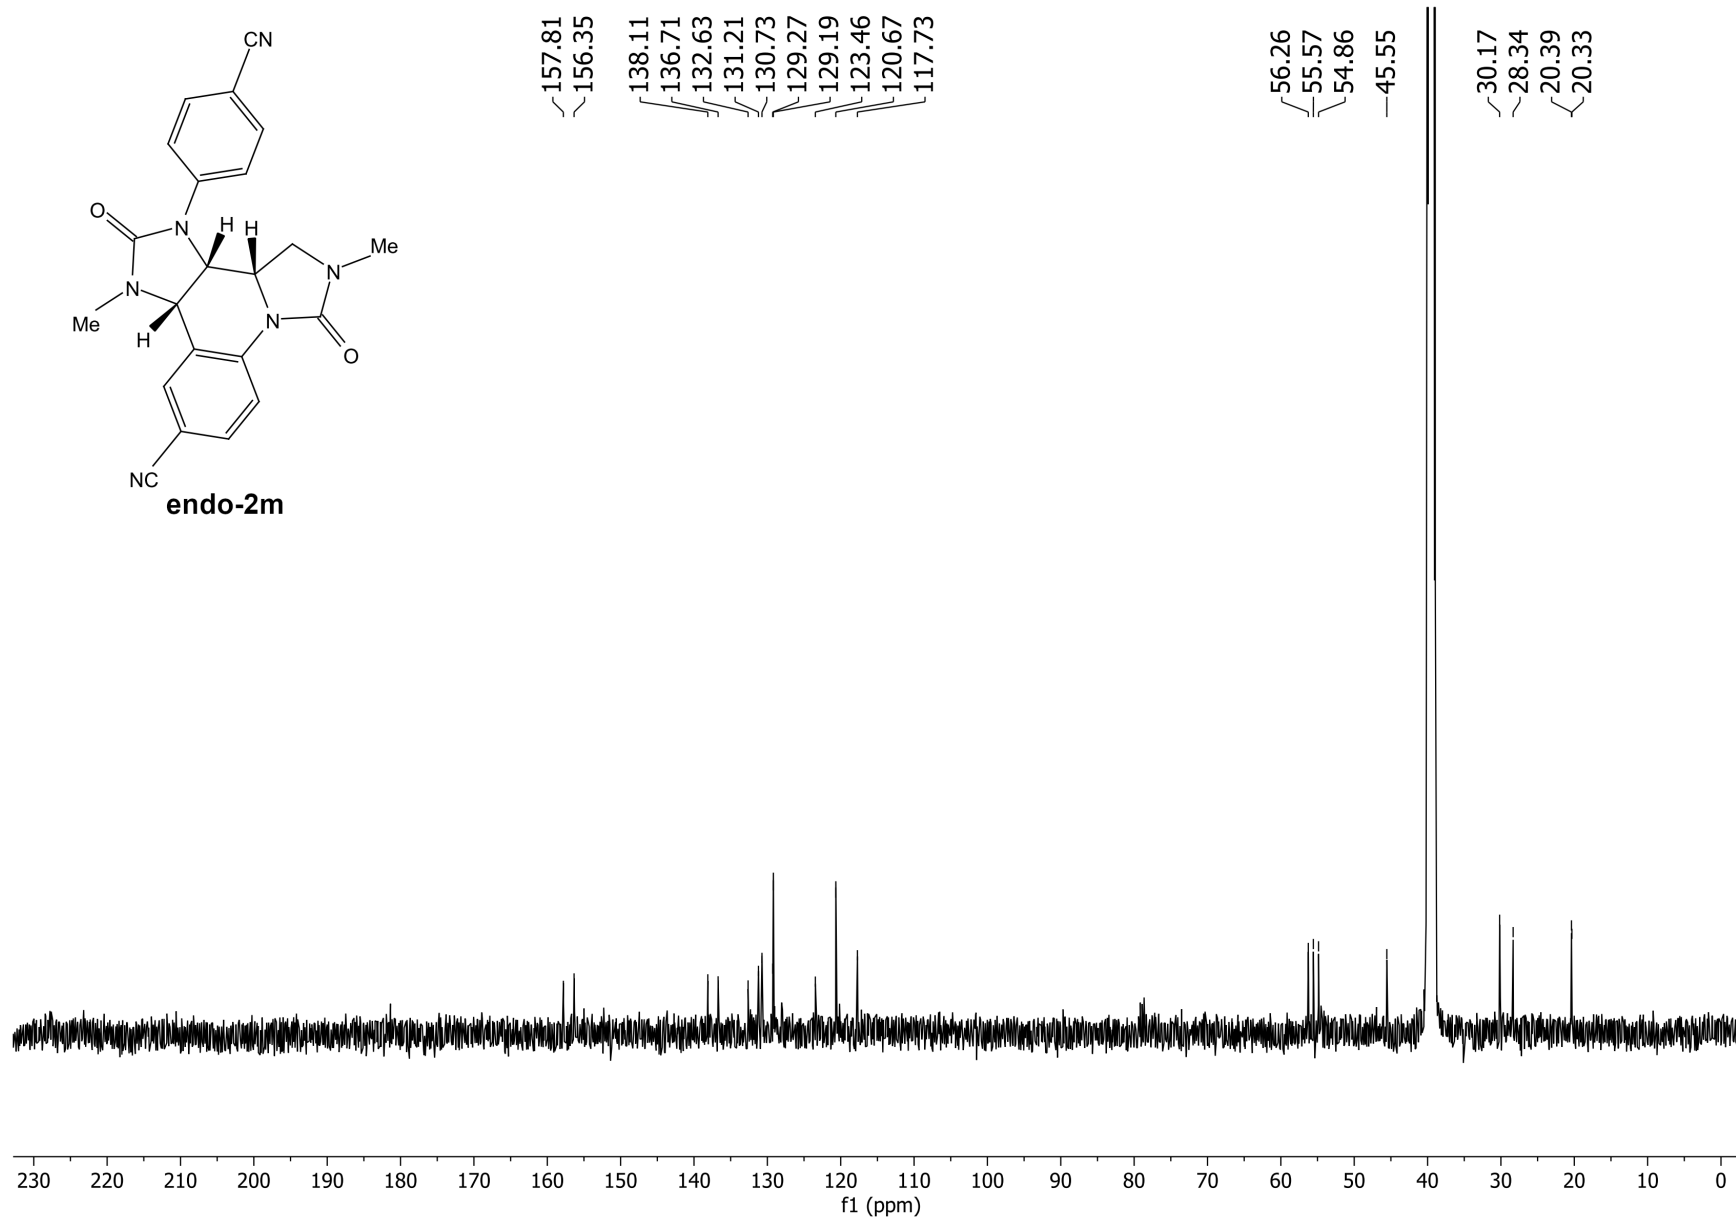

Figure S110.  $^{13}\text{C}$  NMR spectrum ( $(\text{CD}_3)_2\text{SO}$ , 151MHz) of the compound **endo-2m**

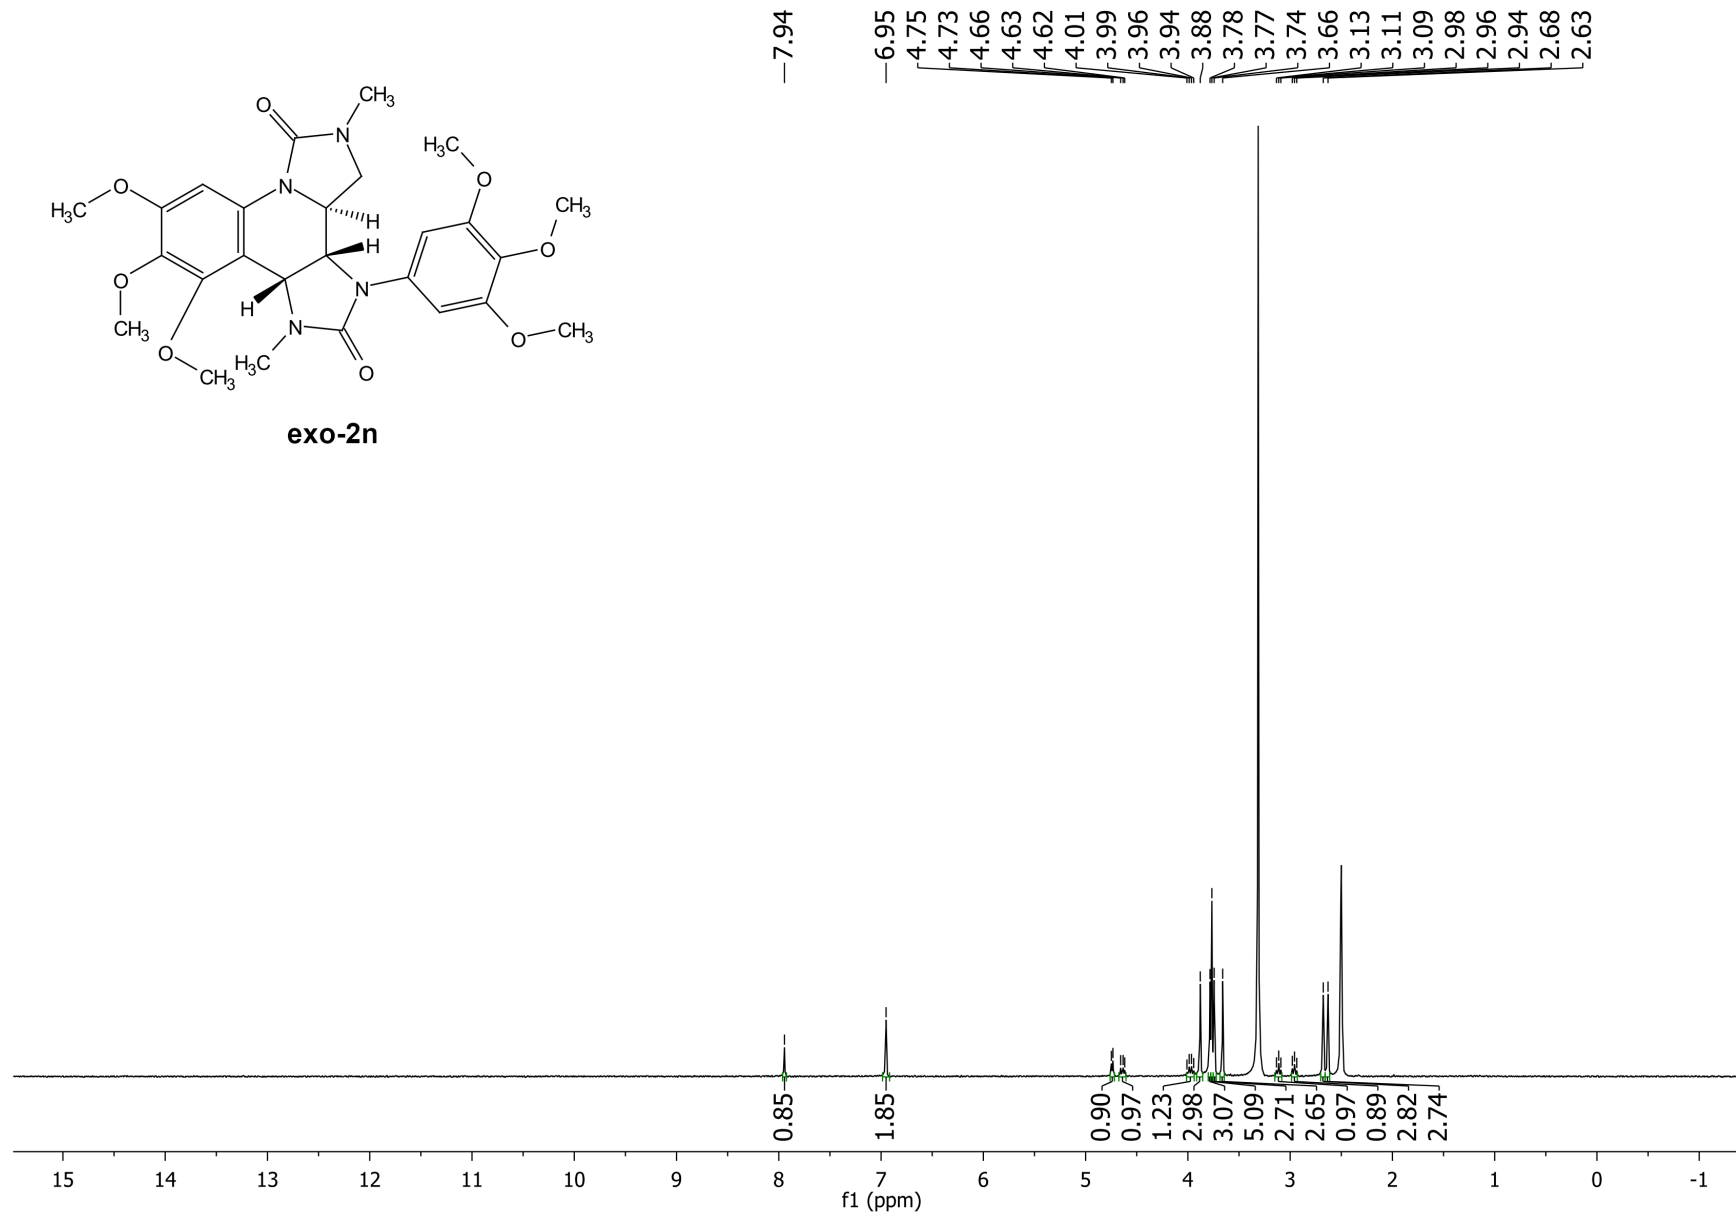

**Figure S111.** <sup>1</sup>H NMR spectrum ((CD<sub>3</sub>)<sub>2</sub>SO, 400MHz) of the compound *exo-2n*

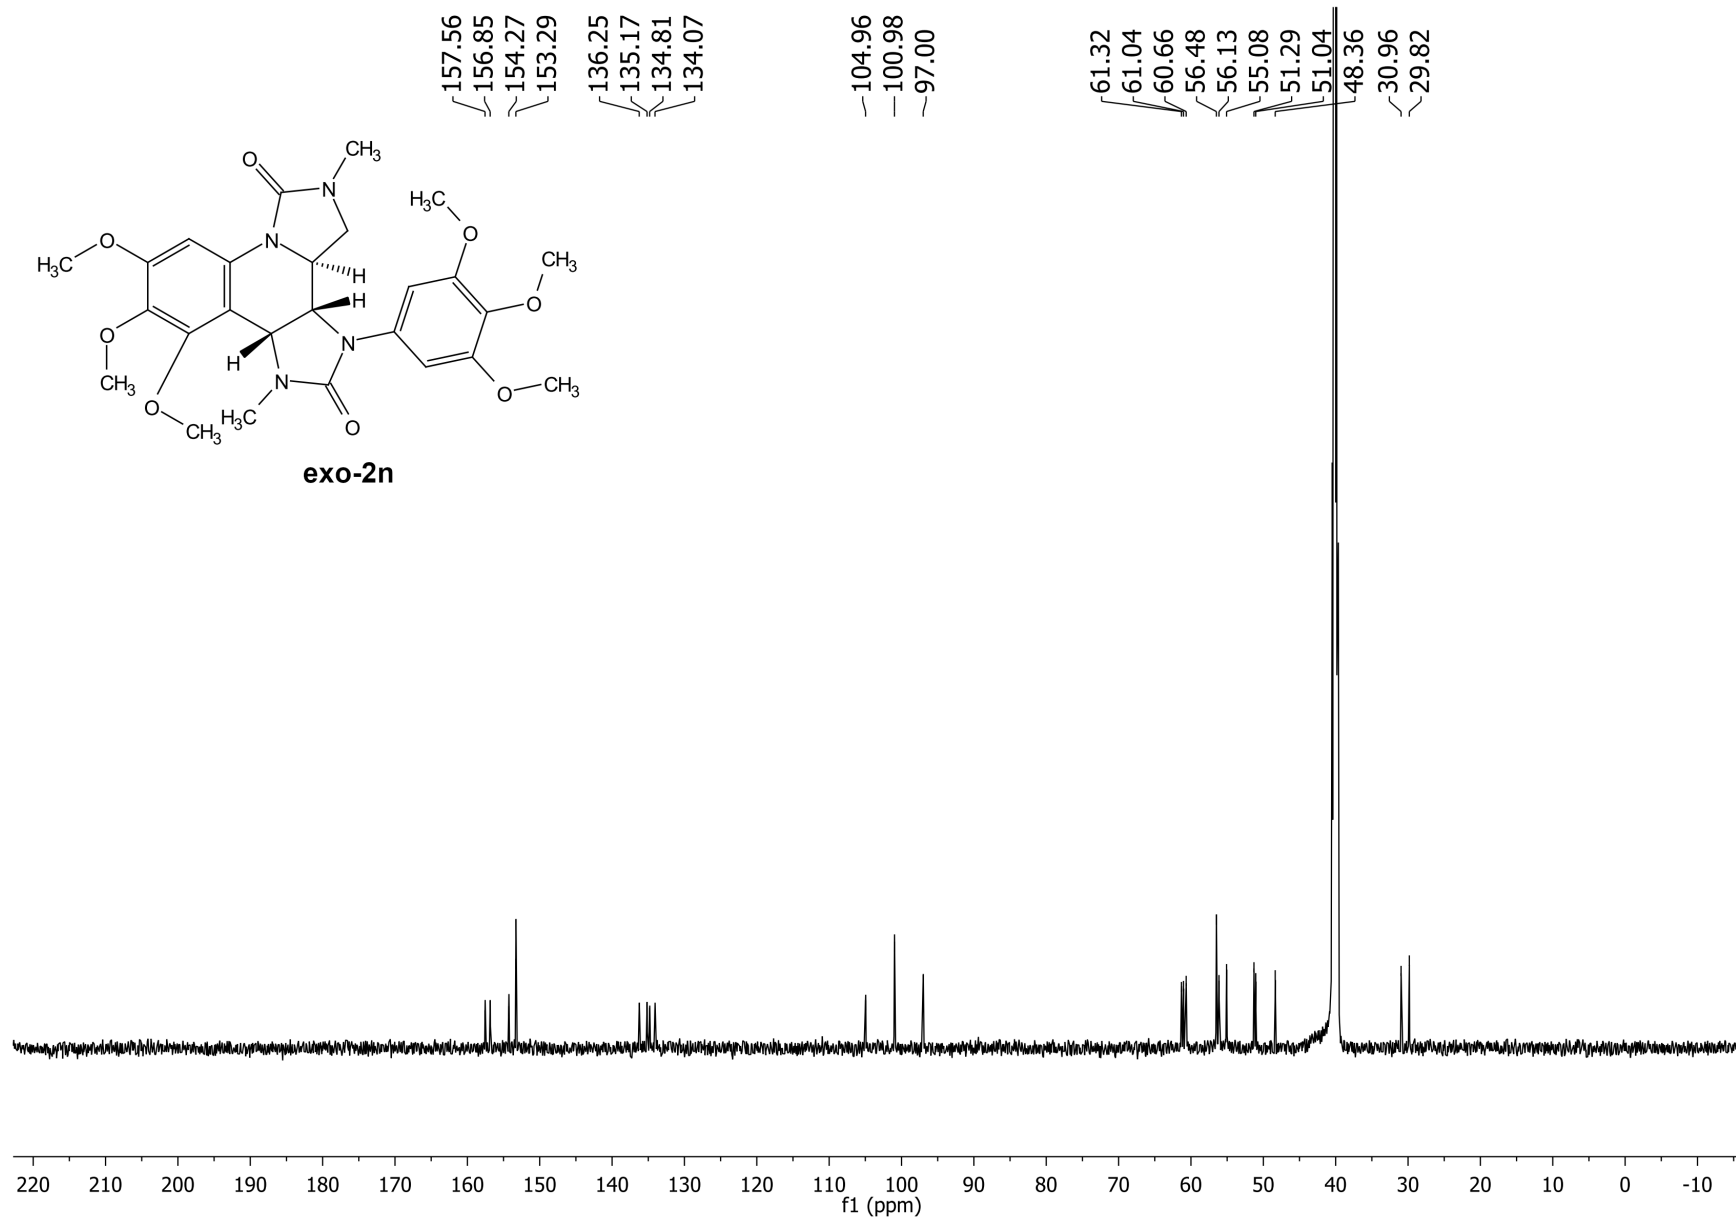

**Figure S112.** <sup>13</sup>C NMR spectrum ((CD<sub>3</sub>)<sub>2</sub>SO, 151MHz) of the compound **exo-2n**

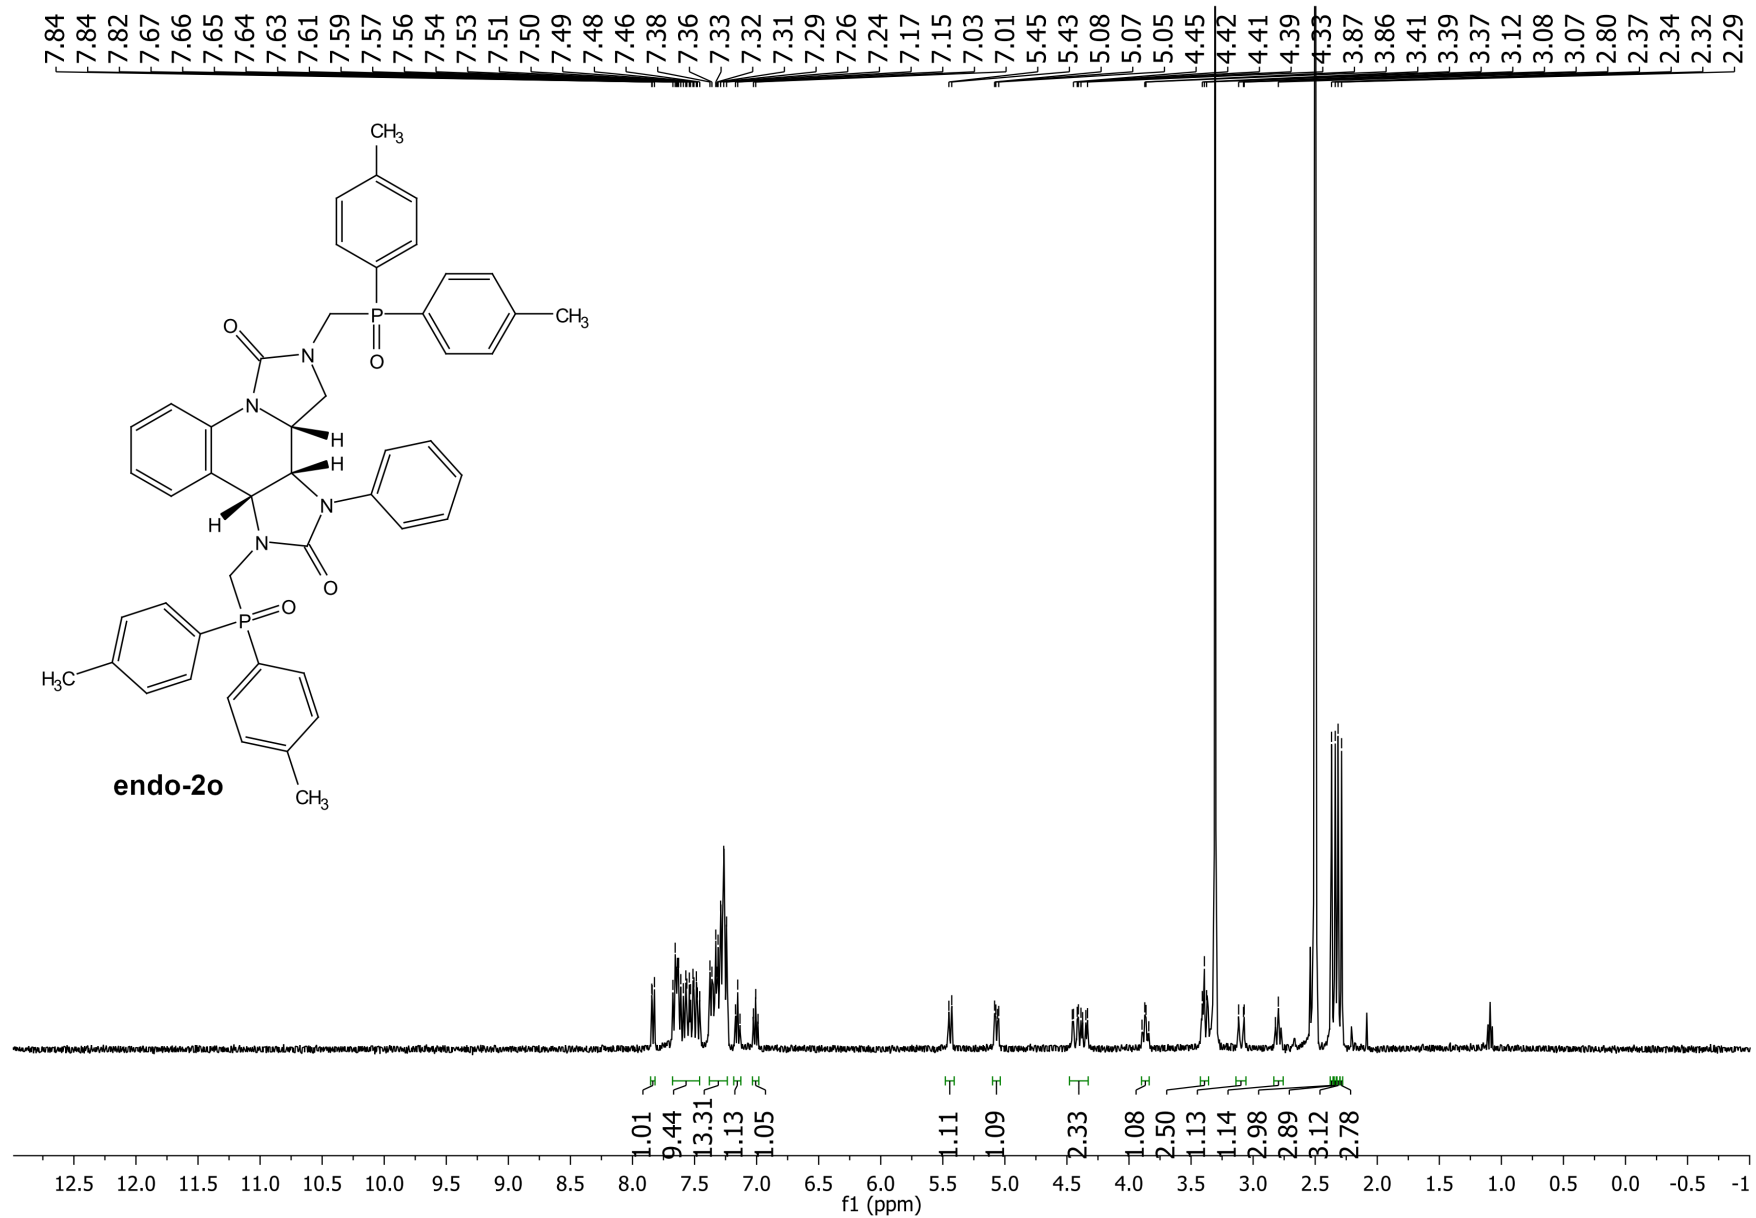

Figure S113. <sup>1</sup>H NMR spectrum ((CD<sub>3</sub>)<sub>2</sub>SO, 500MHz) of the compound **endo-2o**

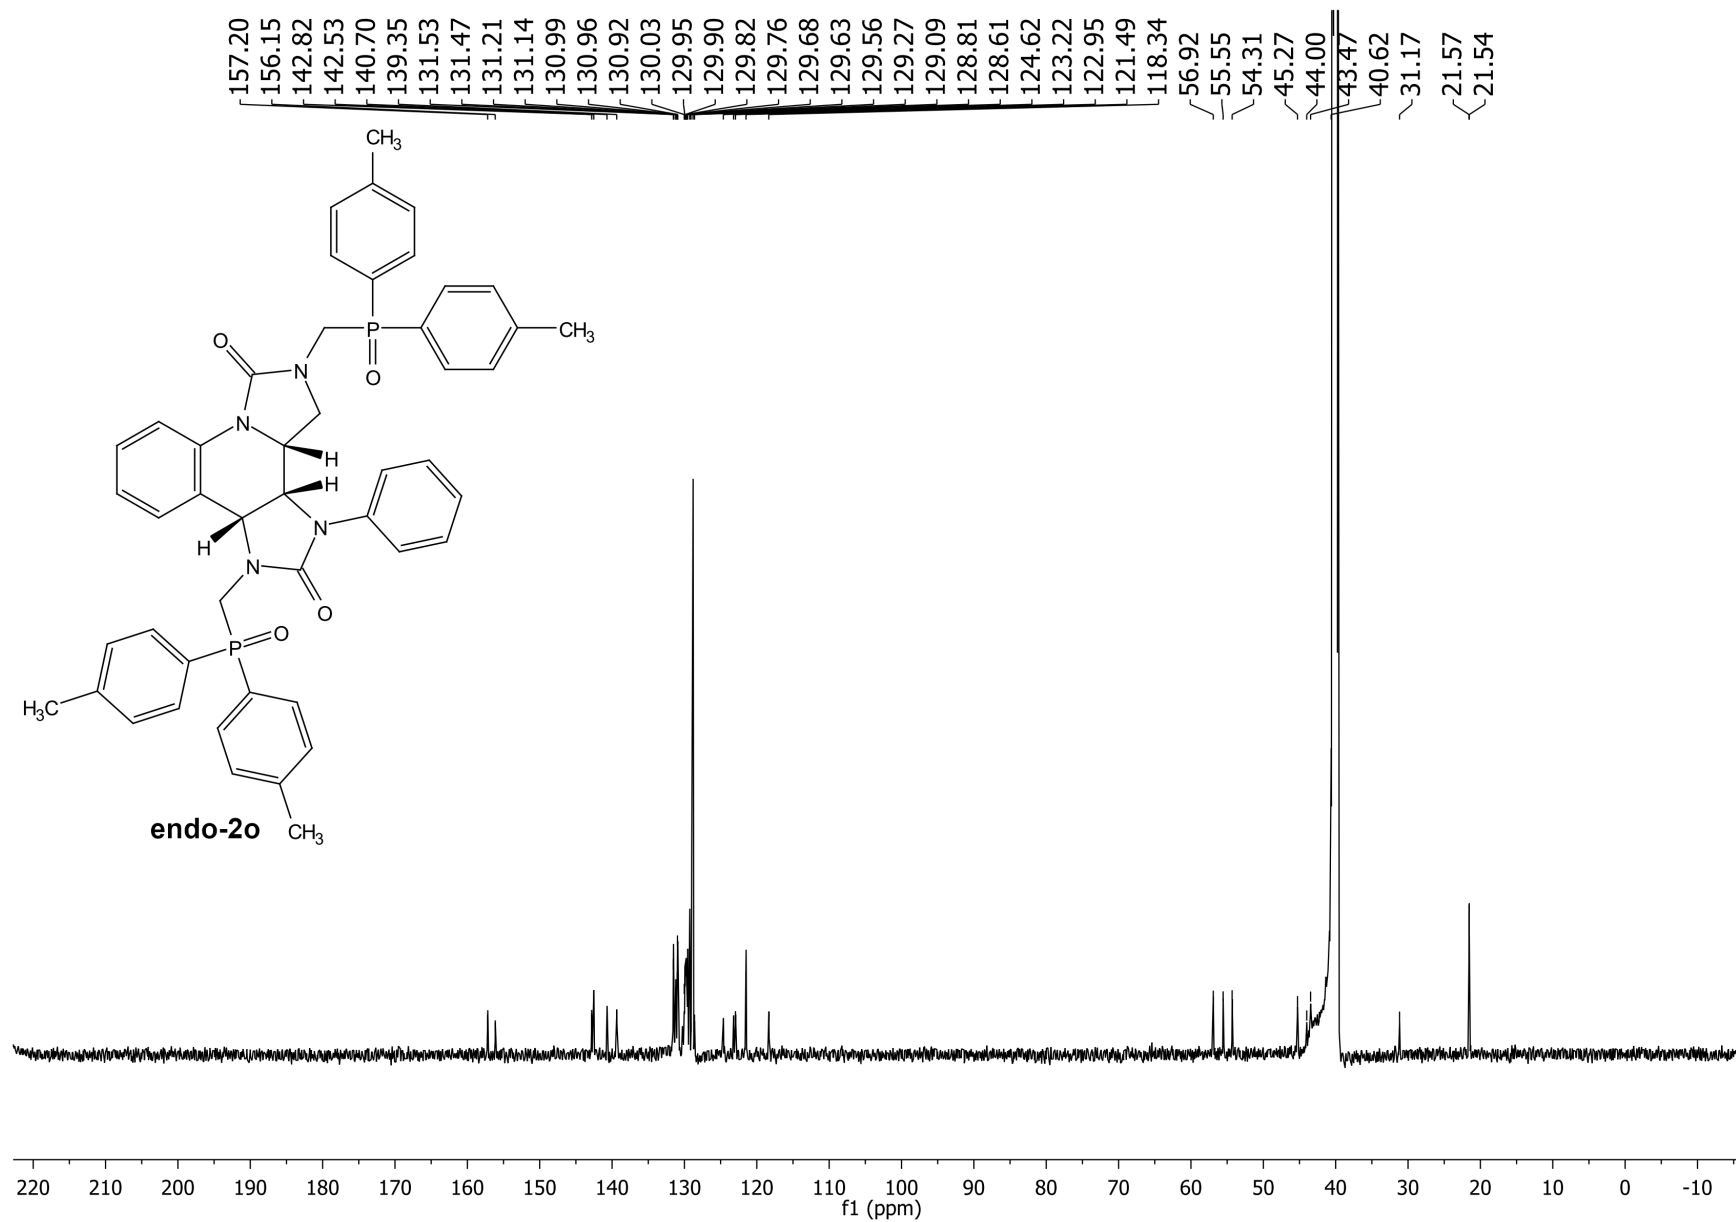

Figure S114. <sup>13</sup>C NMR spectrum ((CD<sub>3</sub>)<sub>2</sub>SO, 126MHz) of the compound *endo-2o*

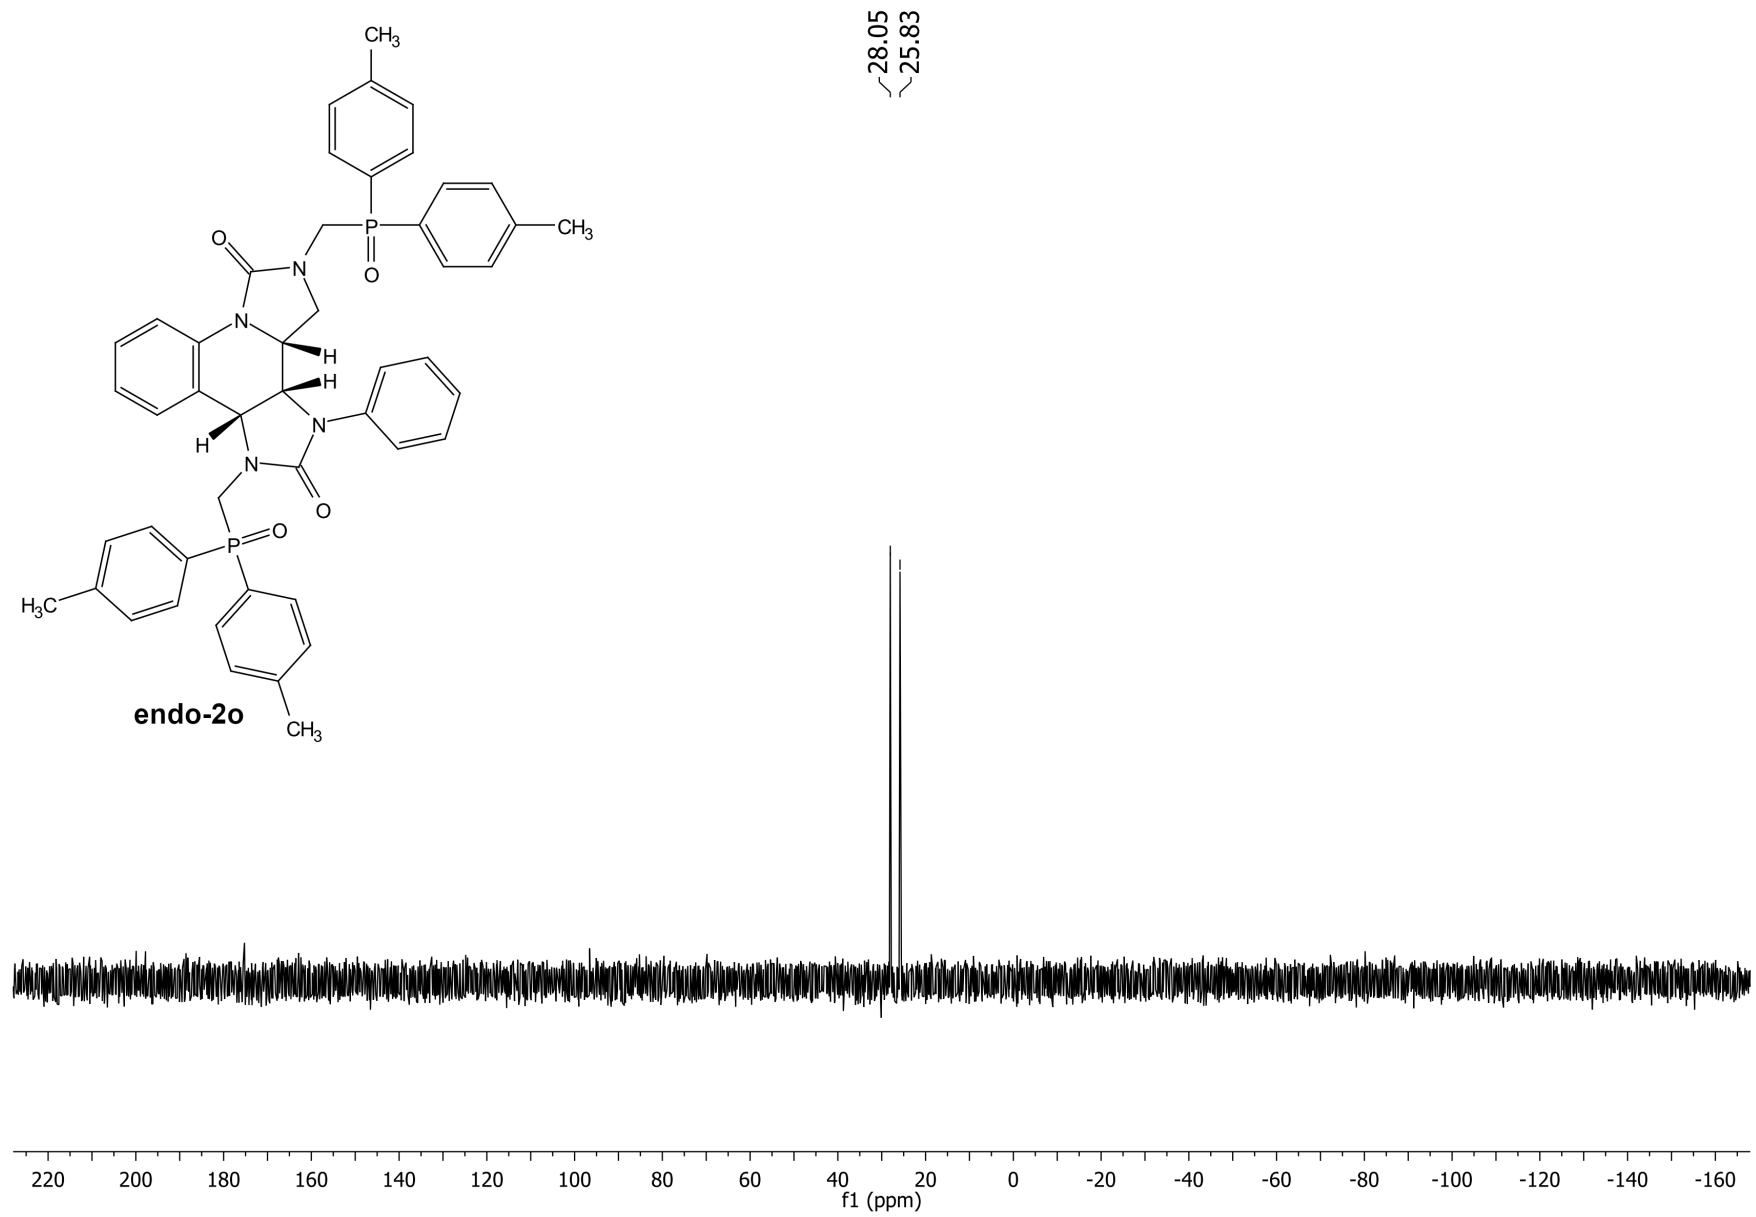

Figure S115.  $^{31}\text{P}$  NMR spectrum ( $(\text{CD}_3)_2\text{SO}$ , 161MHz) of the compound *endo-2o*

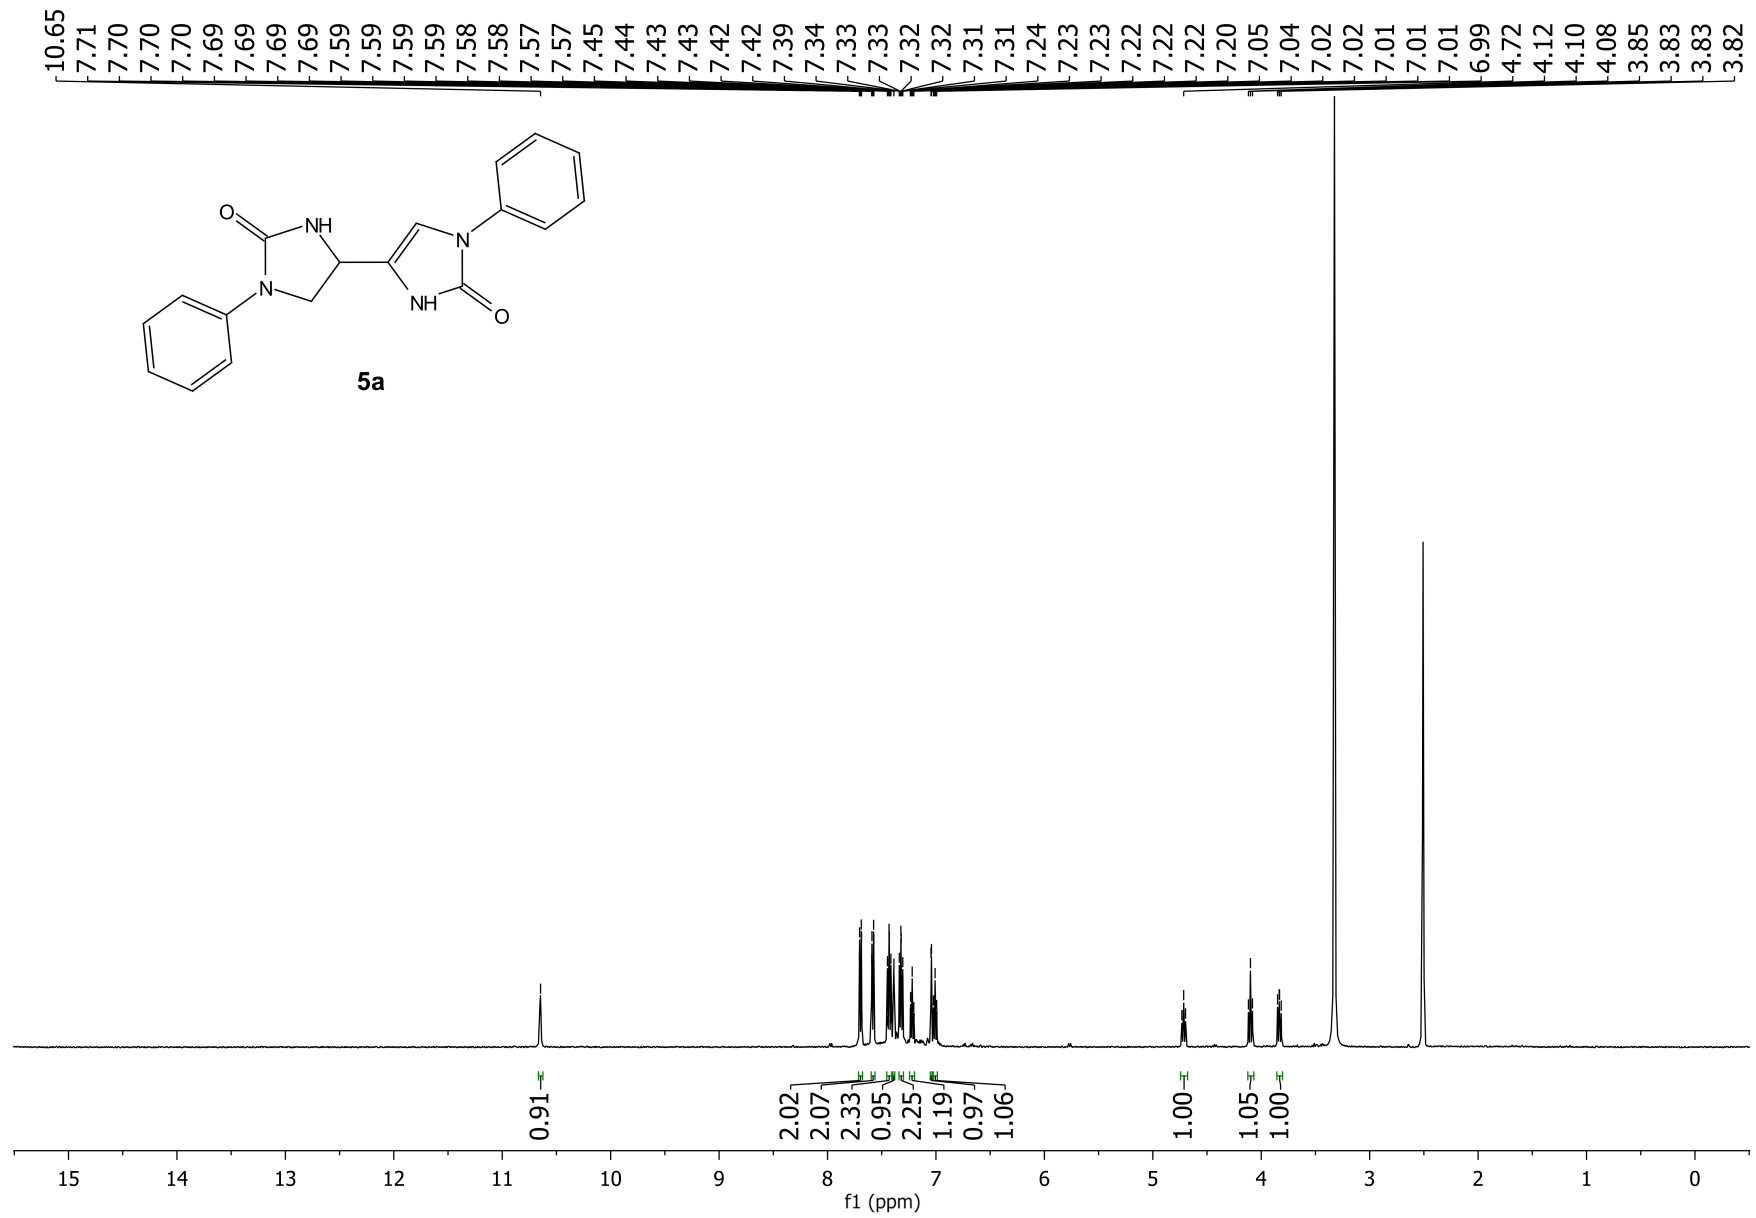

Figure S116.  $^1\text{H}$  NMR spectrum ( $(\text{CD}_3)_2\text{SO}$ , 500MHz) of the compound 5a



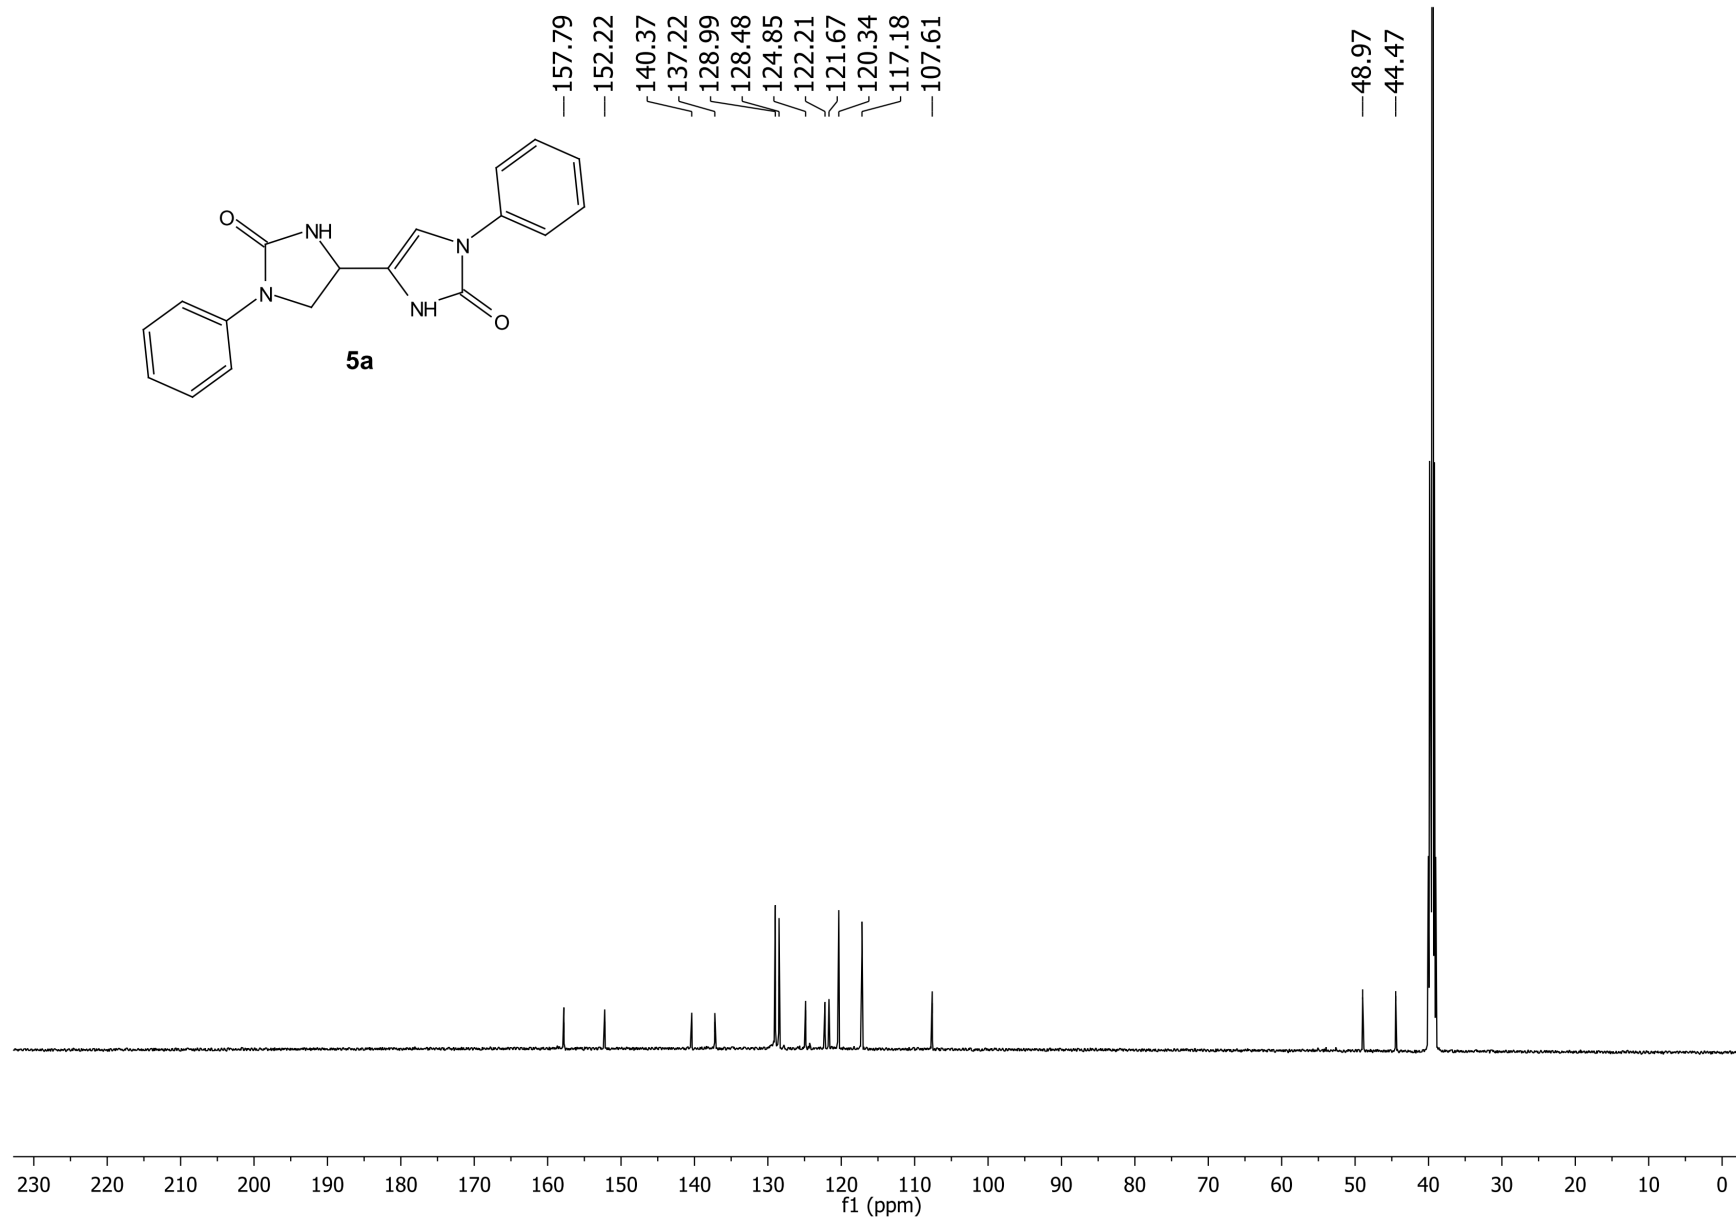

Figure S117. <sup>13</sup>C NMR spectrum ((CD<sub>3</sub>)<sub>2</sub>SO, 151MHz) of the compound 5a

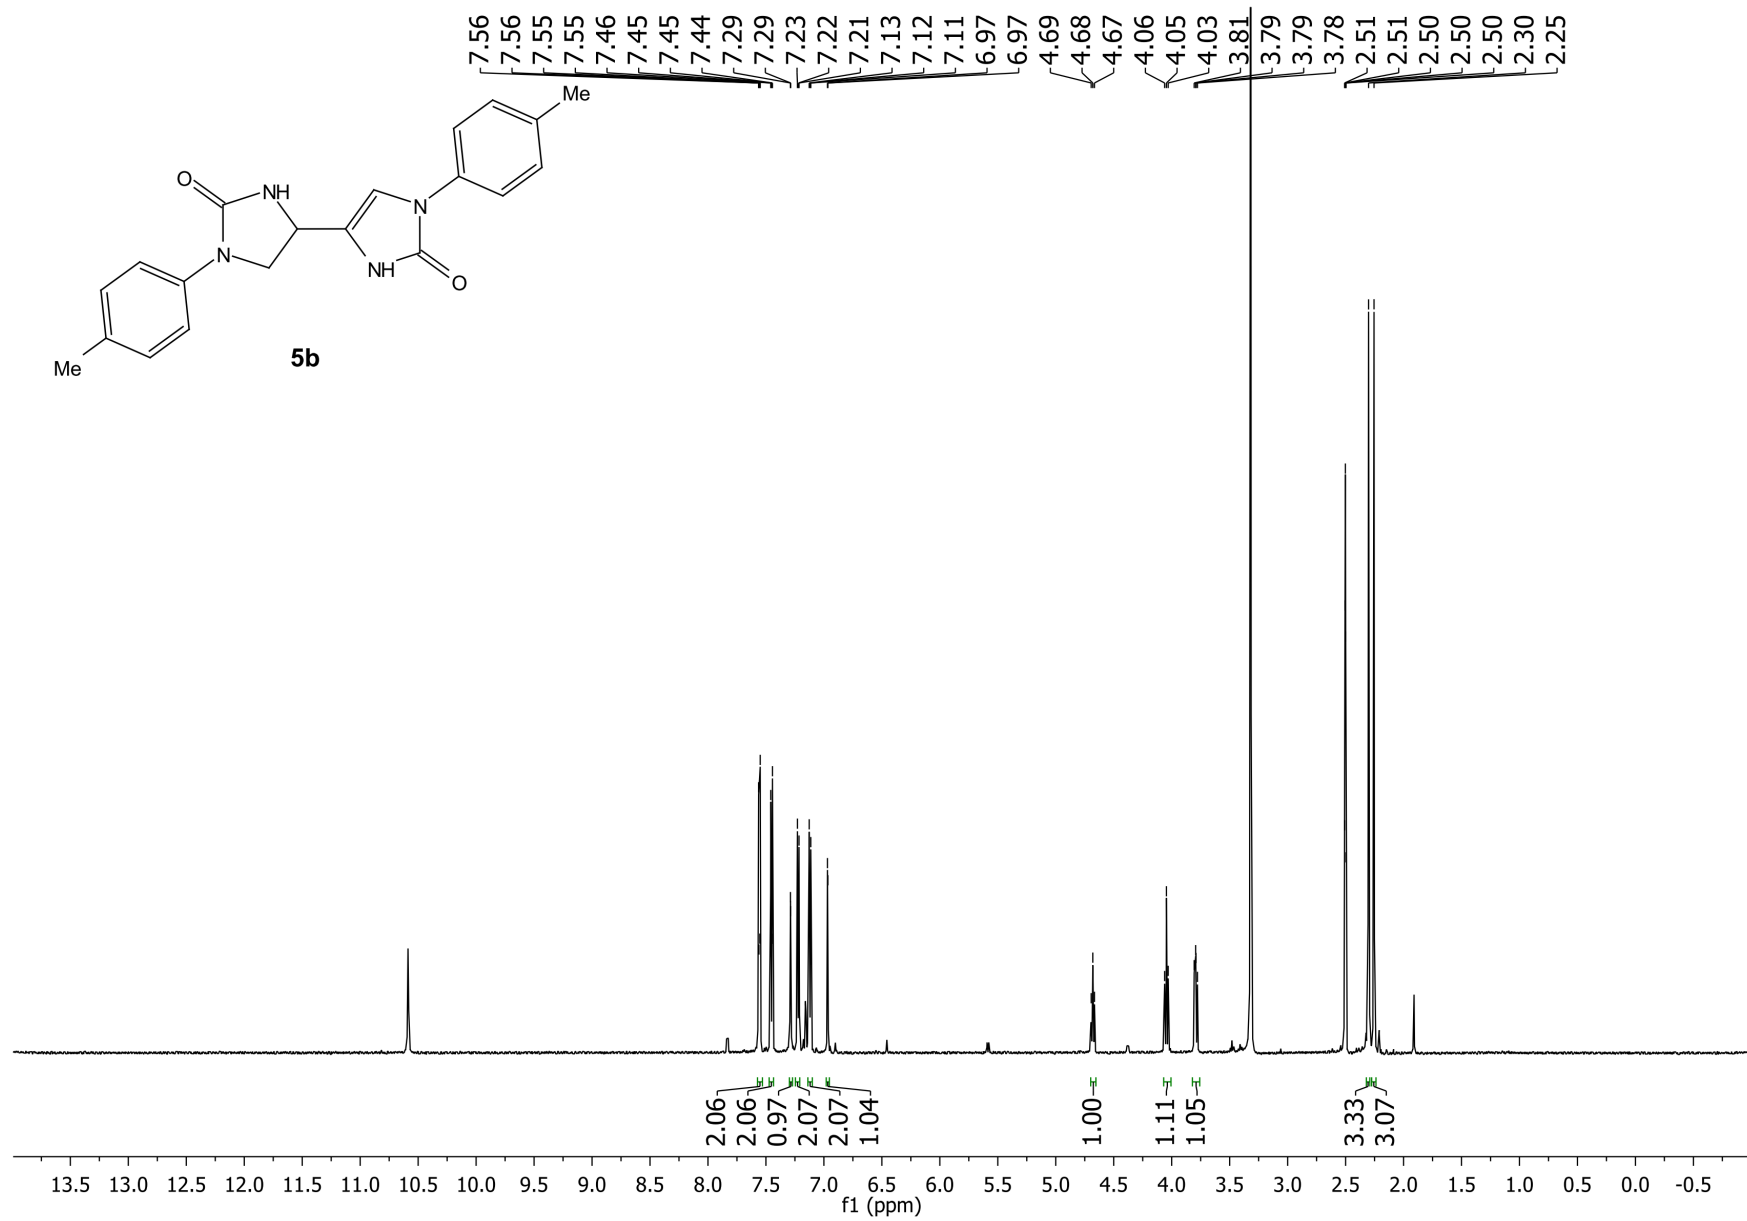

Figure S118.  $^1\text{H}$  NMR spectrum ( $(\text{CD}_3)_2\text{SO}$ , 500MHz) of the compound **5b**

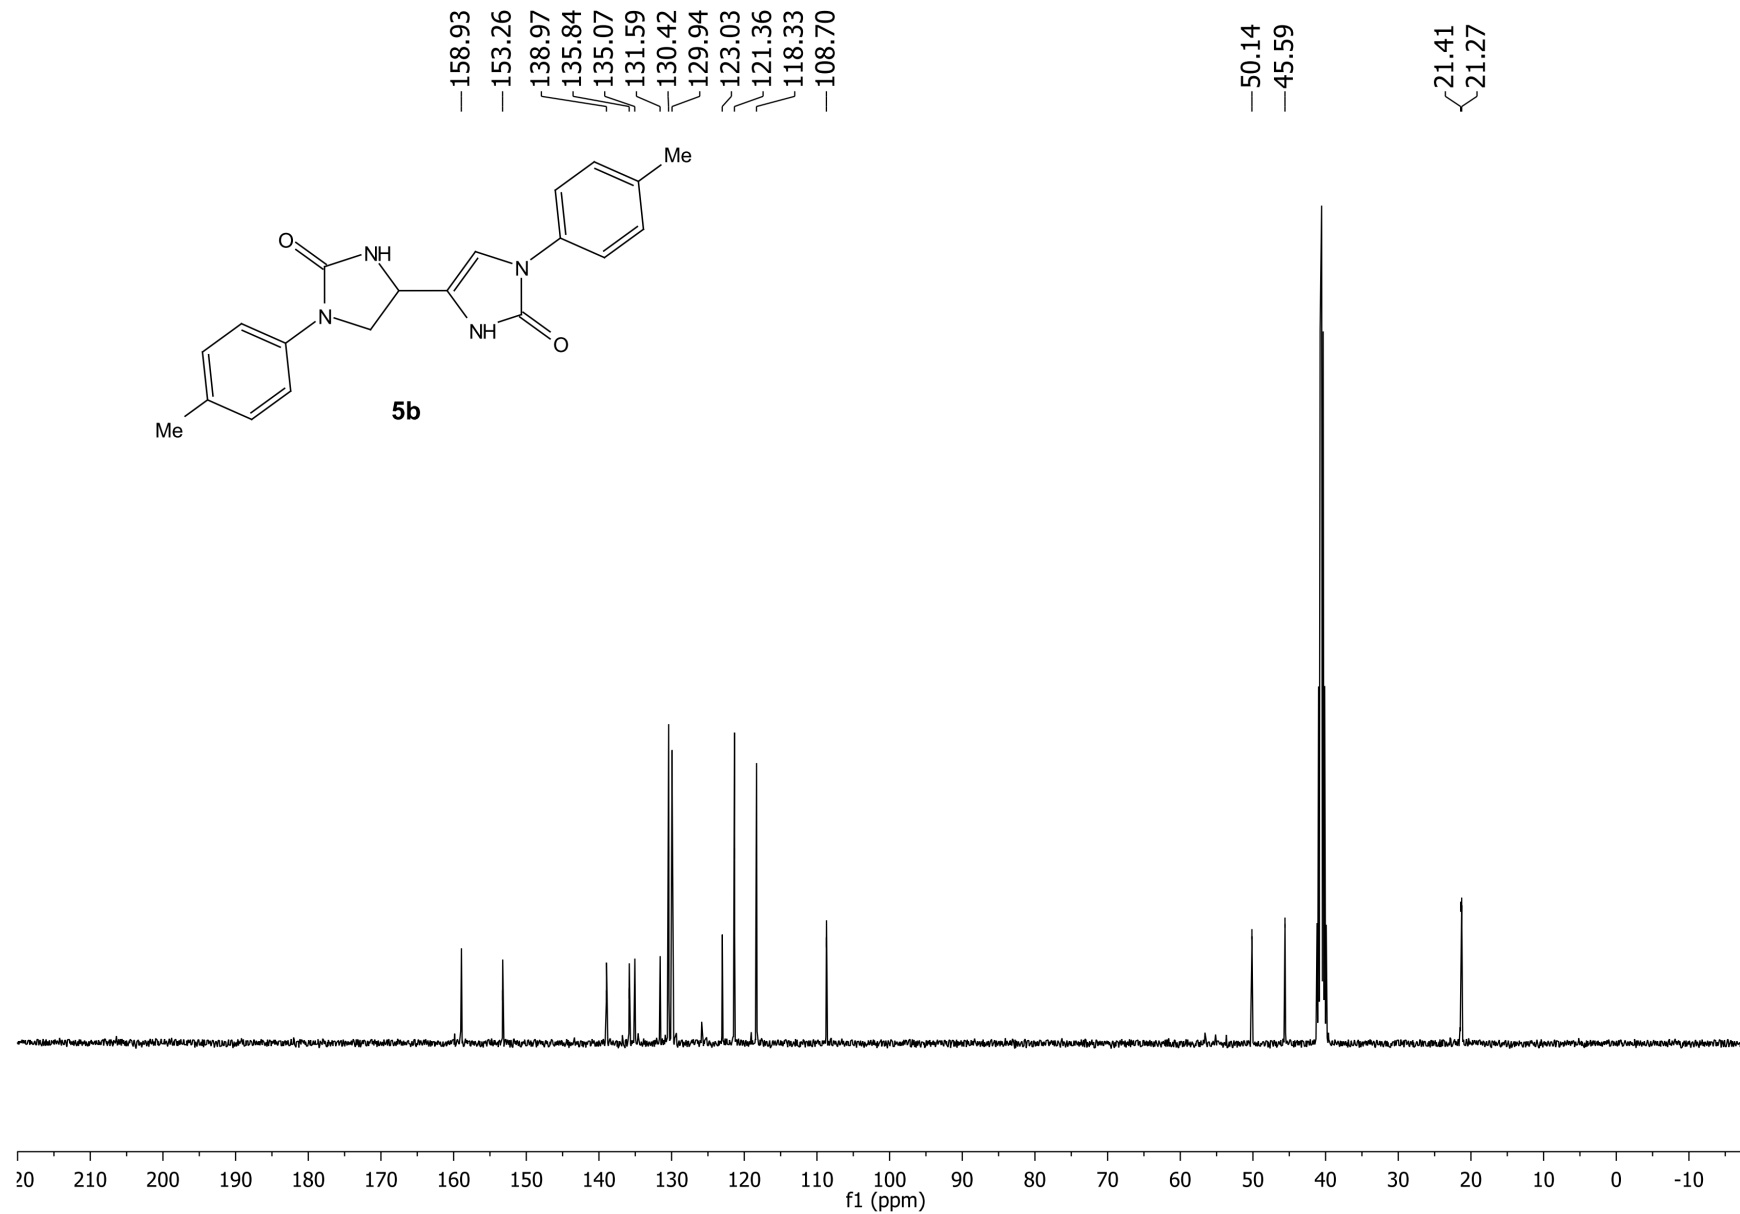

Figure S119. <sup>13</sup>C NMR spectrum ((CD<sub>3</sub>)<sub>2</sub>SO, 151MHz) of the compound **5b**

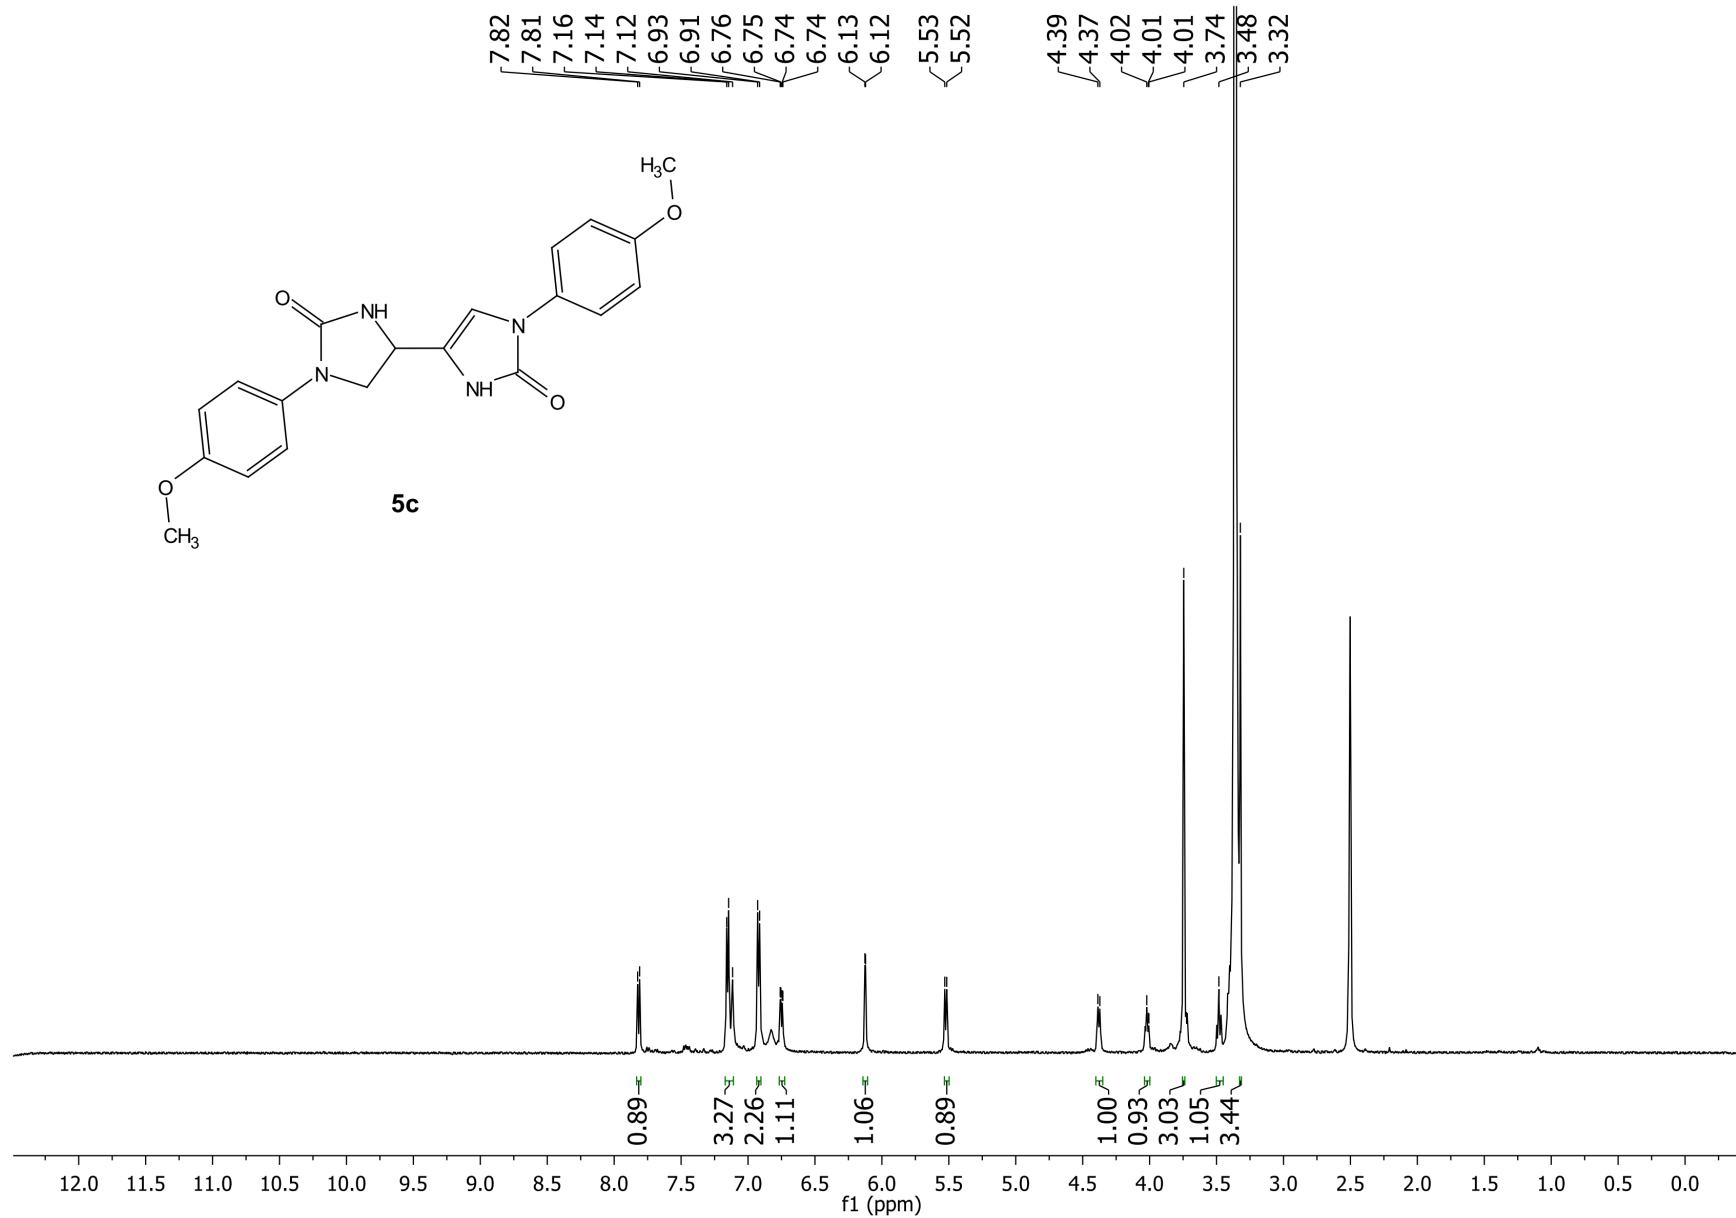

Figure S120.  $^1\text{H}$  NMR spectrum ( $(\text{CD}_3)_2\text{SO}$ , 600MHz) of the compound **5c**

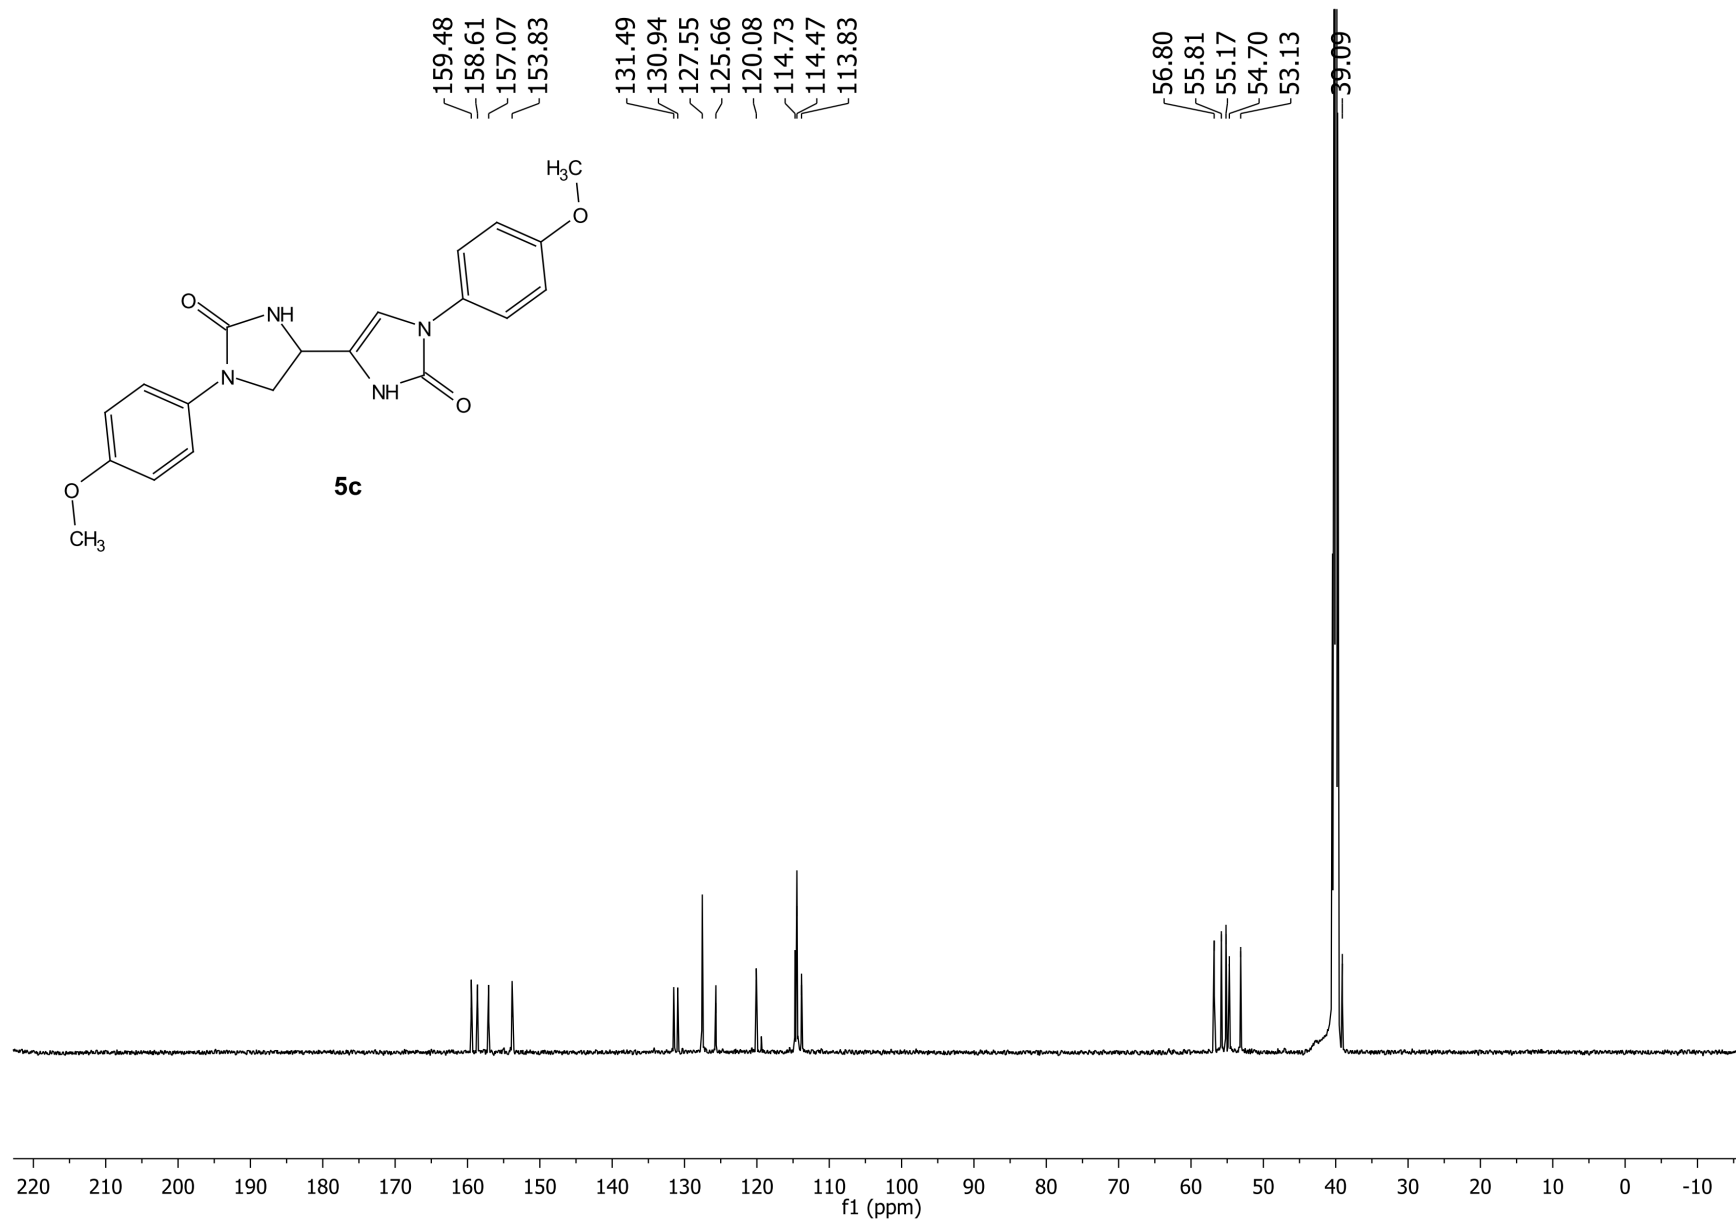

Figure S121. <sup>13</sup>C NMR spectrum ((CD<sub>3</sub>)<sub>2</sub>SO, 151MHz) of the compound **5c**

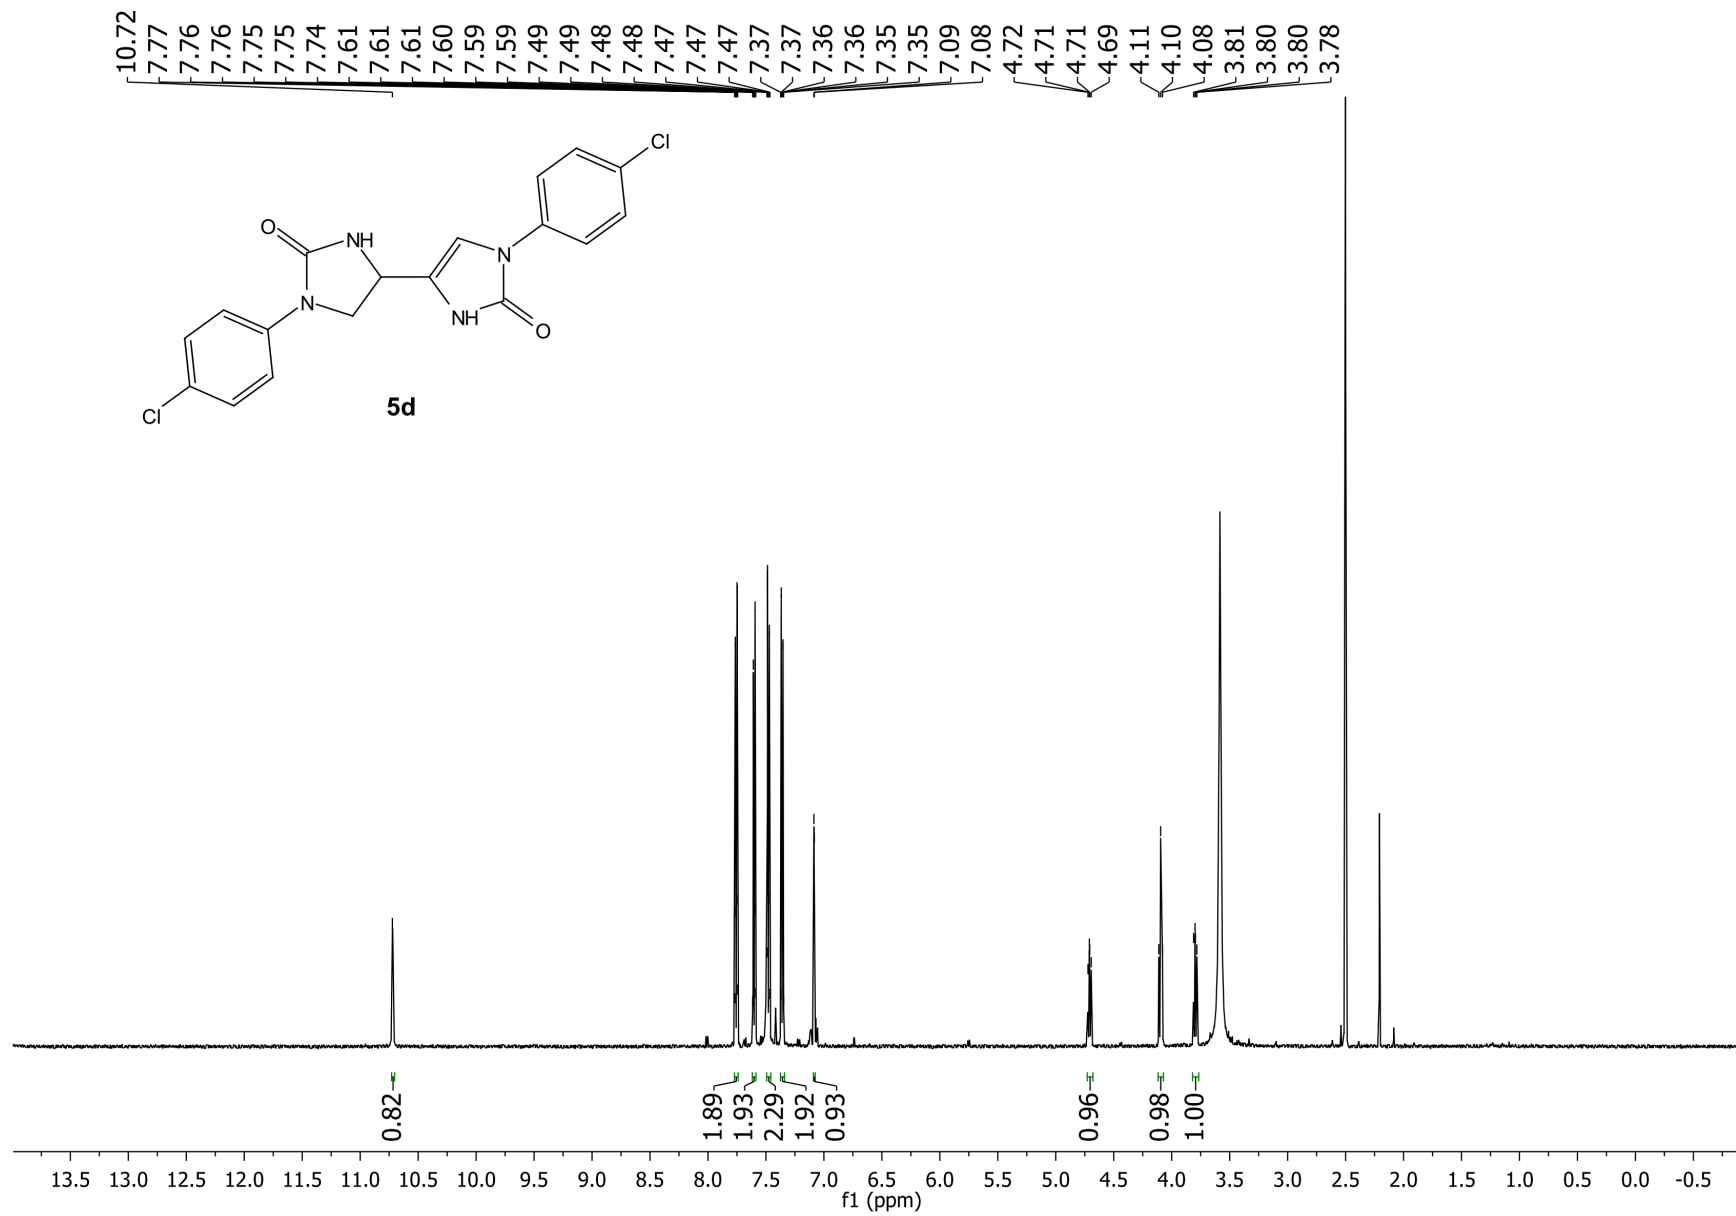

Figure S122. <sup>1</sup>H NMR spectrum ((CD<sub>3</sub>)<sub>2</sub>SO, 600MHz) of the compound **5d**

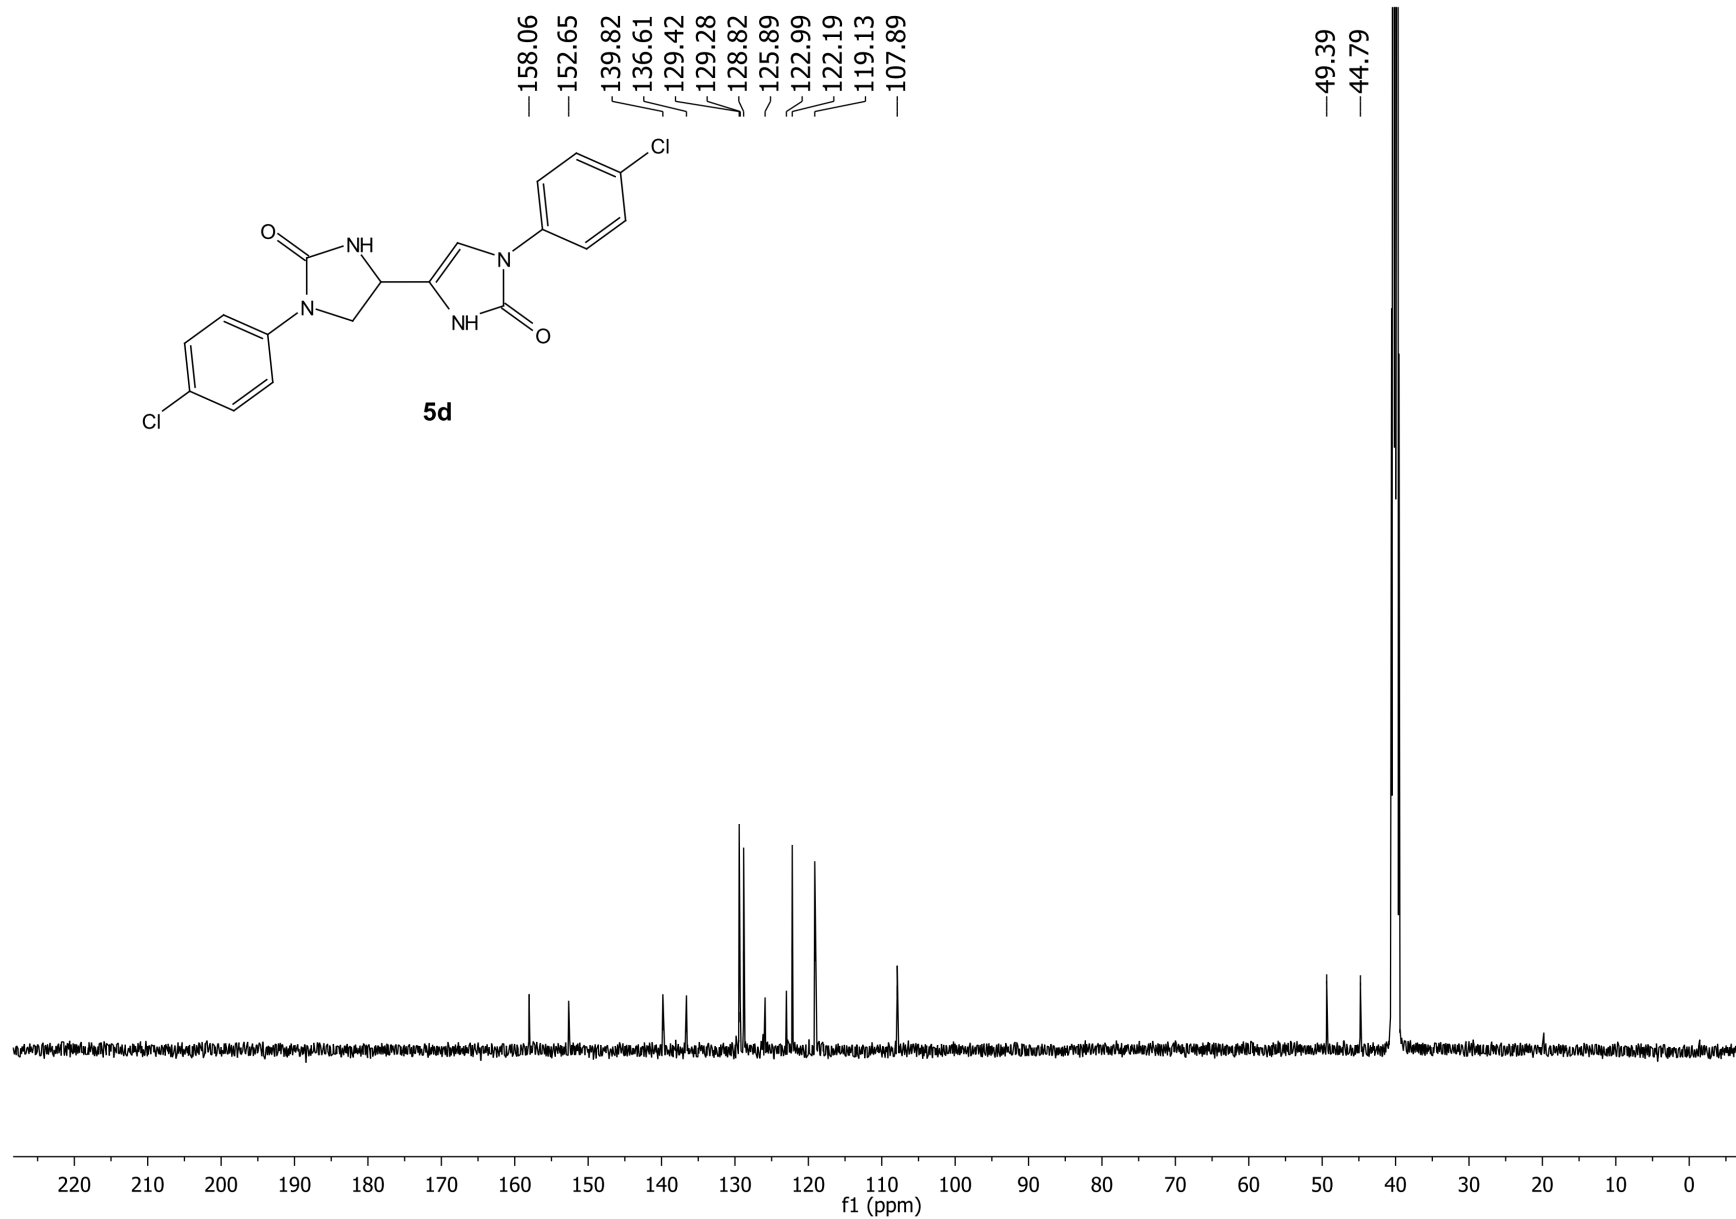

Figure S123.  $^{13}\text{C}$  NMR spectrum ( $(\text{CD}_3)_2\text{SO}$ , 151MHz) of the compound **5d**

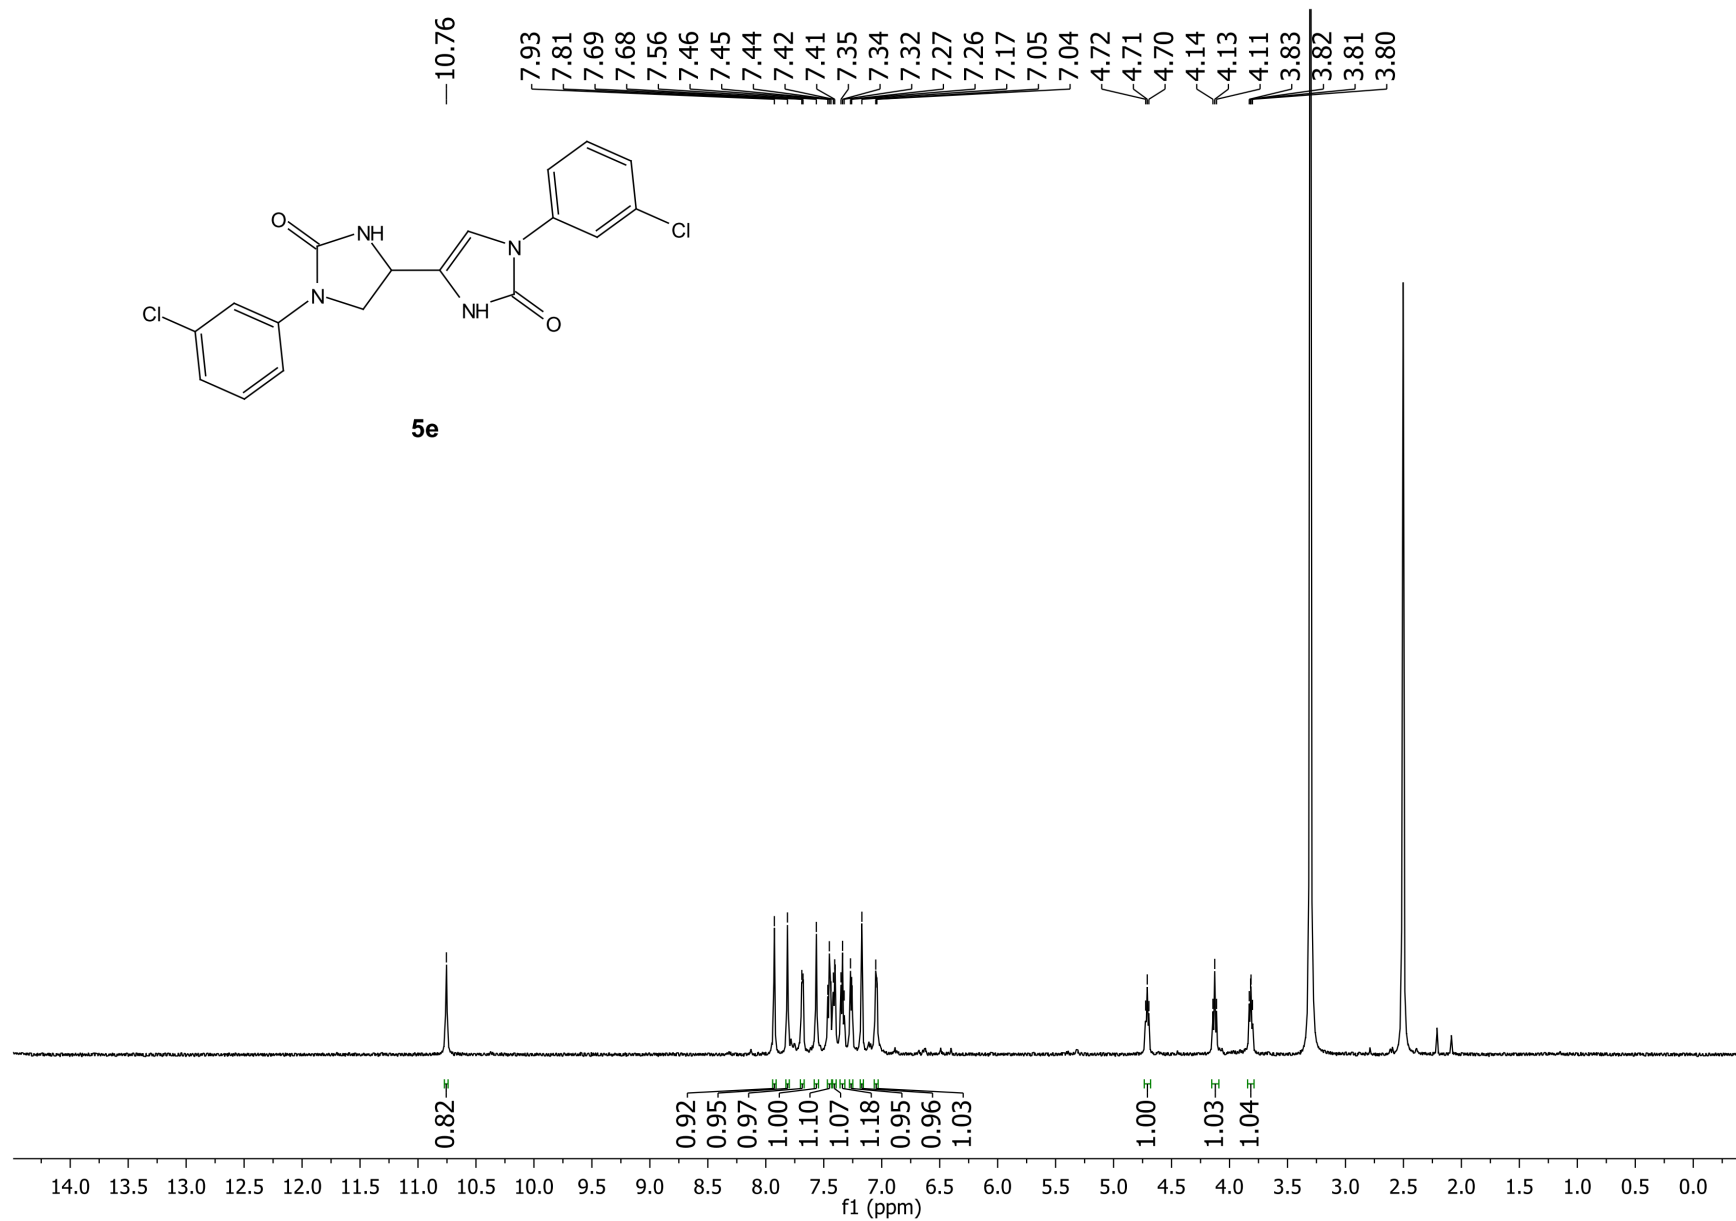

Figure S124.  $^1\text{H}$  NMR spectrum ( $(\text{CD}_3)_2\text{SO}$ , 500MHz) of the compound **5e**



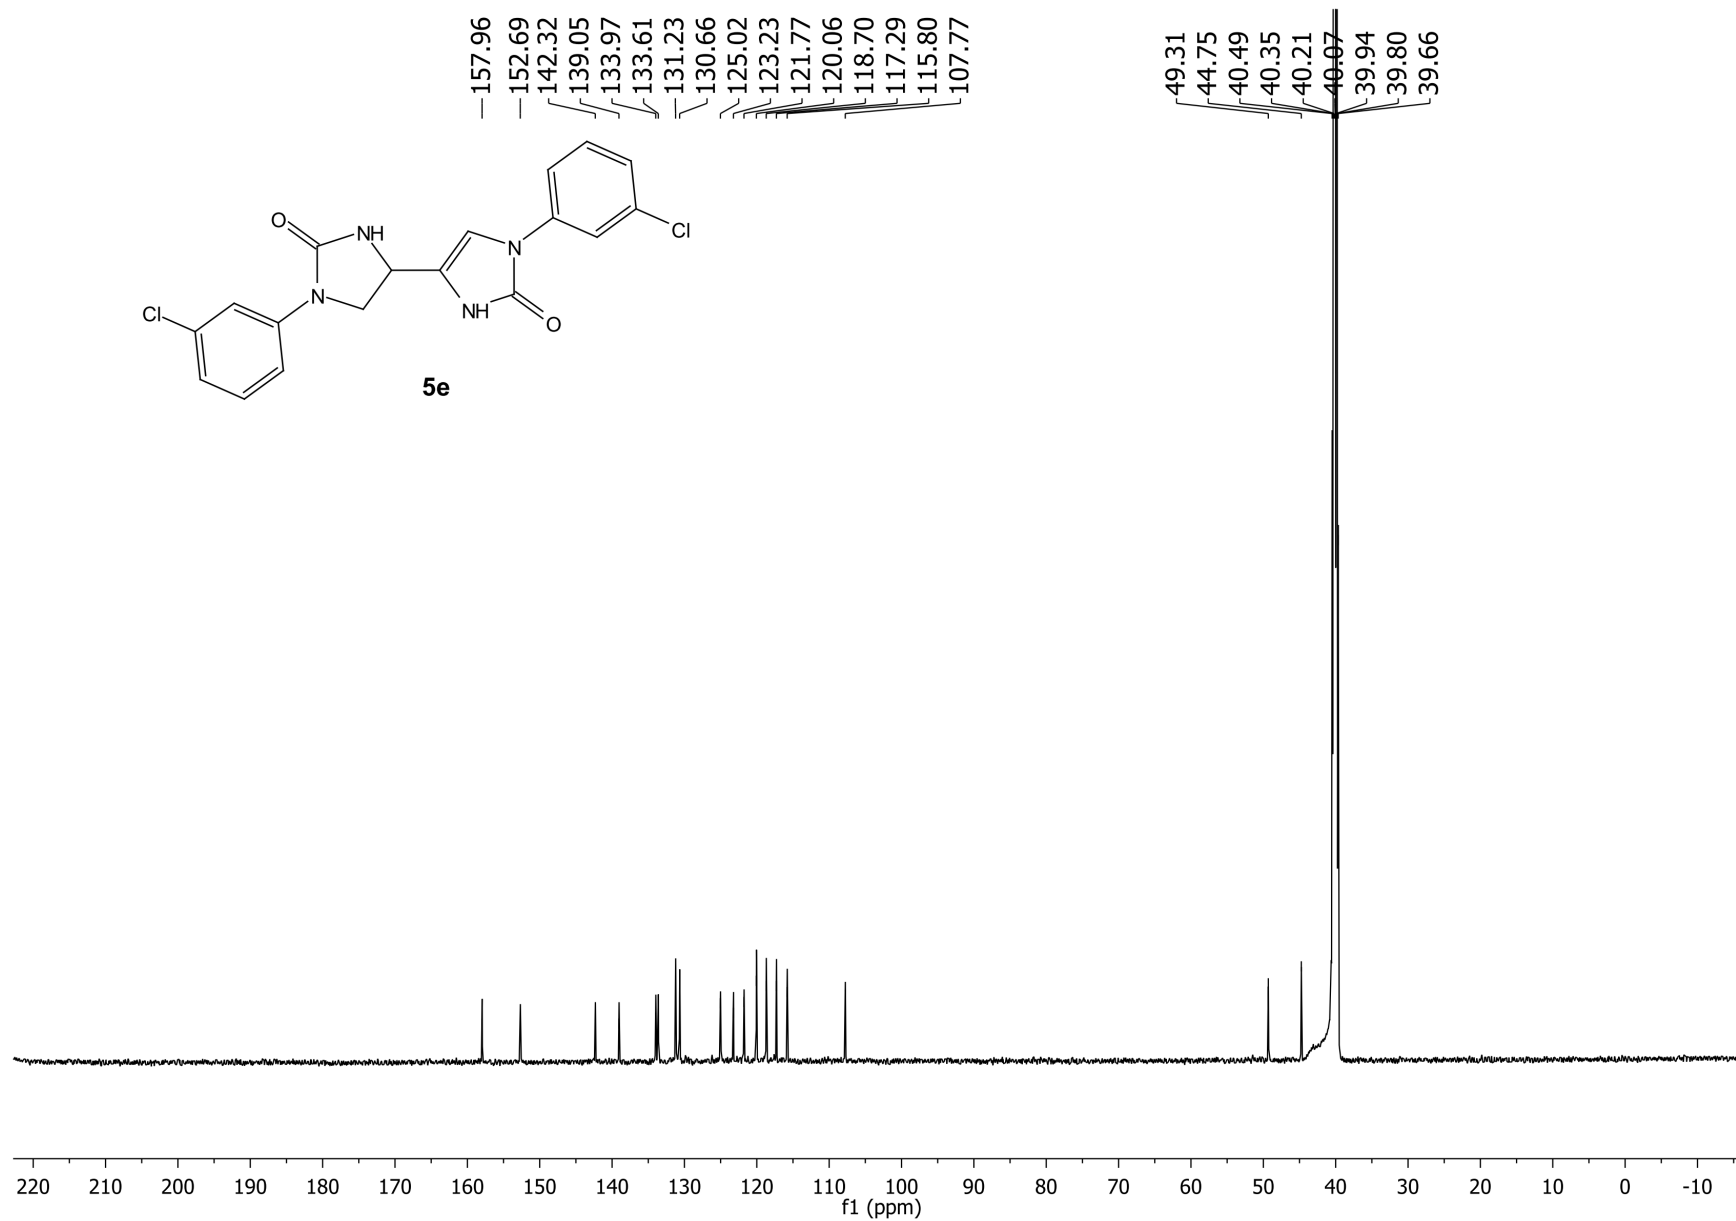

Figure S125. <sup>13</sup>C NMR spectrum ((CD<sub>3</sub>)<sub>2</sub>SO, 151MHz) of the compound 5e
